# Supplementary material for: Super-dense point clouds acquired by an ultralight 10 g solid-state single photon LiDAR.
Source: Research Square preprint supplement (doi:10.21203/rs.3.rs-6814788/v1), 2025-06-11
Supplement: Supplementary file 1 [file 75a0d9214f38649e45ef8160.xlsx]

## Sheet: Fig3b
Time [ns]	Power of pulse[W]	Power of tail [W]
0.105967	0.0181019	0
0.108087	0.022704	0
0.110205	0.0269994	0
0.112322	0.0349765	0
0.114437	0.02117	0
0.11655	0.0282266	0
0.118662	0.0239313	0
0.120772	0.027613	0
0.12288	0.0141133	0
0.124987	0.0297607	0
0.127092	0.0233177	0
0.129196	0.0331356	0
0.131298	0.02117	0
0.133399	0.0199427	0
0.135498	0.0159542	0
0.137595	0.022704	0
0.139691	0.0334424	0
0.141785	0.0337492	0
0.143877	0.0217836	0
0.145968	0.0297607	0
0.148058	0.0371242	0
0.150146	0.0331356	0
0.152232	0.0279198	0
0.154317	0.0309879	0
0.1564	0.0236245	0
0.158482	0.0291471	0
0.160562	0.0248517	0
0.162641	0.0322152	0
0.164718	0.0322152	0
0.166793	0.0386582	0
0.168867	0.0309879	0
0.17094	0.0420332	0
0.173011	0.038965	0
0.175081	0.0401923	0
0.177149	0.0457149	0
0.179215	0.0444876	0
0.18128	0.0512375	0
0.183344	0.0582942	0
0.185406	0.0702598	0
0.187466	0.0708734	0
0.189526	0.0668849	0
0.191583	0.0902026	0
0.193639	0.0874412	0
0.195694	0.101248	0
0.197747	0.123338	0
0.199799	0.13469	0
0.201849	0.140826	0
0.203898	0.165985	0
0.205946	0.187155	0
0.207992	0.219984	0
0.210036	0.252199	0
0.212079	0.300675	0
0.214121	0.368787	0
0.216161	0.439354	0
0.2182	0.539681	0
0.220238	0.656883	0
0.222274	0.77838	0
0.224308	0.930559	0
0.226341	1.10268	0
0.228373	1.27879	0
0.230404	1.47945	0
0.232433	1.68347	0
0.23446	1.91082	0
0.236487	2.12866	0
0.238511	2.32778	0
0.240535	2.50542	0
0.242557	2.68399	0
0.244578	2.82359	0
0.246597	2.93404	0
0.248615	3.01135	0
0.250632	3.03252	0
0.252648	3.04203	0
0.254662	2.99939	0
0.256674	2.91471	0
0.258686	2.81868	0
0.260696	2.73216	0
0.262704	2.61557	0
0.264712	2.49376	0
0.266718	2.36398	0
0.268723	2.22224	0
0.270726	2.08632	0
0.272728	1.9596	0
0.274729	1.8197	0
0.276729	1.69575	0
0.278727	1.56535	0
0.280724	1.44876	0
0.28272	1.33678	0
0.284714	1.24075	0
0.286707	1.14349	0
0.288699	1.04868	0
0.290689	0.982103	0
0.292679	0.903559	0
0.294667	0.839436	0
0.296654	0.774699	0
0.298639	0.707507	0
0.300623	0.67161	0
0.302607	0.618532	0
0.304588	0.582021	0
0.306569	0.543363	0
0.308548	0.505011	0
0.310526	0.482307	0
0.312503	0.458683	0
0.314479	0.434138	0
0.316453	0.400389	0
0.318427	0.392718	0
0.320399	0.347004	0
0.32237	0.326754	0
0.324339	0.307118	0
0.326308	0.299141	0
0.328275	0.280732	0
0.330241	0.257721	0
0.332206	0.233177	0
0.33417	0.206484	0
0.336133	0.193905	0
0.338094	0.180405	0
0.340054	0.167212	0
0.342014	0.16353	0
0.343971	0.154326	0
0.345928	0.14144	0
0.347884	0.129168	0
0.349838	0.122418	0
0.351792	0.120884	0
0.353744	0.107384	0
0.355695	0.104316	0
0.357645	0.0917366	0
0.359594	0.0932707	0
0.361542	0.0780615	0.01705
0.363488	0.0722153	0.00264667
0.365434	0.06681	0.0055975
0.367378	0.0618115	0.010596
0.369322	0.0571896	0.0265699
0.371264	0.0529153	0.0323782
0.373205	0.0489628	0.0332627
0.375145	0.0453072	0.0310888
0.377084	0.0419263	0.0350833
0.379022	0.0387994	0.0314605
0.380959	0.0359072	0.0297503
0.382895	0.0332319	0.0339598
0.384829	0.0307573	0.0416502
0.386763	0.0284682	0.0513028
0.388696	0.0263505	0.0482046
0.390627	0.0243914	0.0553796
0.392558	0.0225788	0.0565785
0.394487	0.0209018	0.0493581
0.396416	0.0193501	0.0493757
0.398343	0.0179144	0.0532659
0.400269	0.0165859	0.060117
0.402195	0.0153566	0.0518352
0.404119	0.0142189	0.0440753
0.406042	0.013166	0.0353102
0.407964	0.0121917	0.0375118
0.409886	0.0112899	0.034425
0.411806	0.0104551	0.0398619
0.413725	0.00968256	0.0311233
0.415643	0.00896739	0.0324521
0.417561	0.00830541	0.0321937
0.419477	0.00769257	0.0364883
0.421392	0.00712527	0.0358283
0.423306	0.00660004	0.0311378
0.42522	0.00611377	0.0383739
0.427132	0.00566353	0.0336083
0.429044	0.00524666	0.0401614
0.430954	0.00486067	0.0368657
0.432863	0.00450326	0.0347686
0.434772	0.00417227	0.0338723
0.436679	0.00386577	0.0332584
0.438586	0.00358191	0.0304741
0.440491	0.00331903	0.0371801
0.442396	0.00307554	0.0257647
0.4443	0.00285004	0.0355014
0.446203	0.00264116	0.0283468
0.448105	0.00244768	0.0343697
0.450006	0.00226846	0.0308672
0.451906	0.00210244	0.0356354
0.453805	0.00194863	0.0370164
0.455703	0.00180616	0.0343976
0.457601	0.00167415	0.0372909
0.459497	0.00155185	0.0325042
0.461393	0.00143853	0.0310835
0.463287	0.00133355	0.0290408
0.465181	0.00123626	0.037422
0.467074	0.00114611	0.0335236
0.468966	0.00106257	0.036982
0.470857	0.00098516	0.0373663
0.472747	0.000913417	0.0319154
0.474637	0.000846929	0.0457884
0.476525	0.000785305	0.0461568
0.478413	0.000728195	0.0495889
0.4803	0.000675256	0.0536304
0.482186	0.000626192	0.0545999
0.484071	0.000580708	0.0534181
0.485955	0.000538548	0.0589828
0.487839	0.000499464	0.06209
0.489721	0.000463234	0.0673421
0.491603	0.000429645	0.0689097
0.493484	0.000398505	0.0671
0.495364	0.000369635	0.0668221
0.497244	0.000342868	0.0708374
0.499122	0.000318047	0.0739303
0.501	0.000295035	0.0751805
0.502877	0.000273696	0.0773495
0.504753	0.000253908	0.0936304
0.506628	0.000235558	0.0970237
0.508503	0.000218542	0.0905976
0.510377	0.000202761	0.0820227
0.51225	0.000188125	0.0924688
0.514122	0.000174552	0.090028
0.515993	0.000161963	0.0986313
0.517864	0.000150287	0.0863705
0.519733	0.000139456	0.0876086
0.521603	0.00012941	0.0839369
0.523471	0.000120091	0.0848666
0.525339	0.000111447	0.0879434
0.527205	0.000103428	0.0977694
0.529072	9.59885e-05	0.101459
0.530937	8.90873e-05	0.103306
0.532801	8.26845e-05	0.0999378
0.534665	7.67441e-05	0.0919666
0.536528	7.12324e-05	0.0843019
0.538391	6.61187e-05	0.0999544
0.540253	6.13736e-05	0.102107
0.542114	5.69709e-05	0.105793
0.543974	5.28855e-05	0.100888
0.545834	4.90944e-05	0.0981305
0.547693	4.55763e-05	0.098134
0.549551	4.23116e-05	0.0864785
0.551408	3.92818e-05	0.0929245
0.553265	3.64701e-05	0.0794277
0.555121	3.38603e-05	0.0769758
0.556976	3.14383e-05	0.0677739
0.558831	2.91904e-05	0.0671626
0.560685	2.71039e-05	0.0656304
0.562539	2.51672e-05	0.0714619
0.564391	2.33695e-05	0.0702365
0.566244	2.17008e-05	0.0656358
0.568095	2.01519e-05	0.05674
0.569946	1.87139e-05	0.0659457
0.571796	1.73789e-05	0.0622654
0.573645	1.61397e-05	0.0601188
0.575494	1.49891e-05	0.0558247
0.577342	1.3921e-05	0.0555189
0.57919	1.29293e-05	0.0521451
0.581037	1.20086e-05	0.0530663
0.582883	1.11536e-05	0.05184
0.584729	1.03598e-05	0.0613519
0.586574	9.62281e-06	0.0598186
0.588418	8.9384e-06	0.058592
0.590262	8.30286e-06	0.0647289
0.592105	7.71273e-06	0.0674908
0.593948	7.16469e-06	0.0585937
0.59579	6.65574e-06	0.0561397
0.597632	6.1831e-06	0.0506176
0.599473	5.74416e-06	0.0616633
0.601313	5.33651e-06	0.0598229
0.603153	4.95789e-06	0.0518462
0.604992	4.60624e-06	0.0420285
0.606831	4.27964e-06	0.0423357
0.608668	3.97629e-06	0.0466313
0.610506	3.69451e-06	0.0441771
0.612343	3.43279e-06	0.0469387
0.614179	3.18967e-06	0.0414163
0.616015	2.96384e-06	0.04878
0.61785	2.75405e-06	0.052462
0.619685	2.55917e-06	0.0573712
0.621519	2.37813e-06	0.0607463
0.623353	2.20995e-06	0.0576784
0.625186	2.05369e-06	0.0521559
0.627019	1.90854e-06	0.047247
0.628851	1.77367e-06	0.049088
0.630683	1.64837e-06	0.0539971
0.632514	1.53195e-06	0.0533836
0.634344	1.42379e-06	0.0490884
0.636174	1.32328e-06	0.0411114
0.638004	1.2299e-06	0.050009
0.639833	1.14312e-06	0.0460206
0.641662	1.06249e-06	0.0506227
0.64349	9.87574e-07	0.0509297
0.645317	9.17954e-07	0.0441799
0.647145	8.53256e-07	0.0358961
0.648971	7.93134e-07	0.039271
0.650798	7.37259e-07	0.0380439
0.652623	6.85335e-07	0.0392712
0.654449	6.3708e-07	0.0319077
0.656274	5.92233e-07	0.0490892
0.658098	5.50553e-07	0.0503165
0.659922	5.11817e-07	0.0401918
0.661745	4.75812e-07	0.0340556
0.663569	4.42349e-07	0.0269989
0.665391	4.11248e-07	0.0291467
0.667213	3.82339e-07	0.0279195
0.669035	3.55468e-07	0.0245445
0.670857	3.30491e-07	0.0208628
0.672678	3.07275e-07	0.0266923
0.674498	2.85694e-07	0.0251582
0.676318	2.65633e-07	0.0236242
0.678138	2.46984e-07	0.0187152
0.679957	2.29649e-07	0.0236242
0.681776	2.13533e-07	0.015954
0.683595	1.98552e-07	0.0251583
0.685413	1.84624e-07	0.0285333
0.687231	1.71676e-07	0.0156472
0.689048	1.59639e-07	0.0196358
0.690865	1.48448e-07	0.01442
0.692682	1.38043e-07	0.0165677
0.694498	1.2837e-07	0.0196358
0.696314	1.19376e-07	0.0171813
0.69813	1.11014e-07	0.0181018
0.699945	1.03239e-07	0.00613611
0.70176	9.60099e-08	0.01442
0.703574	8.92884e-08	0.007977
0.705388	8.30384e-08	0.00859062
0.707202	7.72272e-08	0.00521571
0.709016	7.18235e-08	0.00521572
0.710829	6.67987e-08	0.0138064
0.712642	6.21262e-08	0.0107383
0.714454	5.77814e-08	0.0141133
0.716267	5.37412e-08	0.00582935
0.718079	4.99838e-08	0.0067498
0.71989	4.64899e-08	-4.64899e-08
0.721701	4.32408e-08	0.00767024
0.723513	4.02192e-08	0.0092043
0.725323	3.7409e-08	0.00889748
0.727134	3.47958e-08	0.00859067
0.728944	3.23655e-08	0.00828387
0.730754	3.01051e-08	0.0236244
0.732563	2.8003e-08	0.0202495
0.734373	2.6048e-08	0.0156474
0.736182	2.42296e-08	0.00797706
0.73799	2.25385e-08	0.00767026
0.739799	2.09656e-08	0.00674983
0.741607	1.95028e-08	0.00920432
0.743415	1.81421e-08	0.00859069
0.745223	1.68765e-08	0.00460215
0.747031	1.56994e-08	0.0101248
0.748838	1.46045e-08	0.00736346
0.750645	1.35862e-08	0.00490897
0.752452	1.26389e-08	0.0134997
0.754258	1.17578e-08	0.00736346
0.756065	1.09382e-08	0.0116588
0.757871	1.01758e-08	0.00705665
0.759677	9.46669e-09	0.00797708
0.761482	8.80701e-09	0.0138065
0.763288	8.19342e-09	0.0184087
0.765093	7.62259e-09	0.0248517
0.766898	7.0916e-09	0.0230108
0.768703	6.59766e-09	0.0174882
0.770508	6.13815e-09	0.0214768
0.772312	5.71071e-09	0.0196359
0.774117	5.31306e-09	0.0107384
0.775921	4.94313e-09	0.0144201
0.777725	4.59898e-09	0.00981796
0.779529	4.27885e-09	0.00644302
0.781333	3.98101e-09	0.00644302
0.783136	3.70393e-09	0.0104316
0.78494	3.44616e-09	0.0110452
0.786743	3.20634e-09	0.0141133
0.788546	2.98323e-09	0.0184087
0.790349	2.77567e-09	0.0217836
0.792152	2.58256e-09	0.02117
0.793954	2.40289e-09	0.0128861
0.795757	2.23574e-09	0.0082839
0.797559	2.08022e-09	0.0156474
0.799361	1.93553e-09	0.0168746
0.801164	1.80092e-09	0.0184087
0.802966	1.67567e-09	0.0101248
0.804768	1.55914e-09	0.0199427
0.80657	1.45073e-09	0.011352
0.808371	1.34985e-09	0.011352
0.810173	1.25599e-09	0.0177951
0.811975	1.16867e-09	0.00797709
0.813776	1.08742e-09	0.0156474
0.815577	1.01182e-09	0.00613622
0.817379	9.41482e-10	0.0125793
0.81918	8.76032e-10	0.0174882
0.820981	8.15139e-10	0.0223972
0.822782	7.58476e-10	0.0208632
0.824583	7.05757e-10	0.0131929
0.826384	6.56702e-10	0.0153406
0.828185	6.1106e-10	0.0131929
0.829986	5.6859e-10	0.000613618
0.831787	5.29073e-10	0.0055226
0.833588	4.92305e-10	0.0107384
0.835388	4.58091e-10	0.0165678
0.837189	4.26255e-10	0.0138065
0.83899	3.96633e-10	0.0165678
0.84079	3.6907e-10	0.0177951
0.842591	3.43422e-10	0.0181019
0.844392	3.19557e-10	0.0141133
0.846192	2.97349e-10	0.00736347
0.847993	2.76685e-10	0.0134997
0.849794	2.57458e-10	0.00490898
0.851594	2.39566e-10	0.00736347
0.853395	2.22919e-10	0.00521579
0.855195	2.07427e-10	0.00644303
0.856996	1.93012e-10	0.00368173
0.858797	1.79599e-10	0.000306809
0.860597	1.67118e-10	0.0153406
0.862398	1.55505e-10	0.00521579
0.864199	1.44698e-10	-0.00153406
0.866	1.34641e-10	0.00429536
0.8678	1.25284e-10	-0.00153406
0.869601	1.16577e-10	0.00306811
0.871402	1.08474e-10	-0.00368174
0.873203	1.00935e-10	-0.00337493
0.875004	9.39196e-11	-0.00153406
0.876805	8.73916e-11	0.00767028

## Sheet: Fig3cd
Pulse width of gate driver [ns]	Peak power [W]	Average power [mW]	Laser pulse width [ns]	Tail ratio	Center wavelength pulse [nm]	Center wavelength tail [nm]
2.78876	0.649077	0.37	88.9	0.458016	821.738	821.907
3.17318	1.37833	0.53	64.8	0.360787	822.92	822.962
3.30133	1.59258	0.64	61.4	0.392636	823.046	822.793
3.55761	2.04436	0.64	56.1	0.318792	823.848	823.046
3.94204	2.42408	0.67	55	0.209491	824.692	822.45
4.07018	2.55753	0.67	55.1	0.187537	824.439	822.287
4.32646	2.67003	0.64	53.6	0.129061	824.481	820.388
4.71089	2.90127	0.61	49	0.11041	824.692	820.388
5.09531	2.8058	0.62	51.8	0.103398	824.819	819.798
5.22346	3.04203	0.63	48.7	0.0956005	824.945	819.924

## Sheet: Fig3e
Time [s]	Intensity [a. u.]
0	0.0266565
3.906e-12	3.823e-05
7.813e-12	-0.0245965
1.1719e-11	-0.0303552
1.5625e-11	-0.0192216
1.9531e-11	0.00323754
2.3438e-11	0.0250569
2.7344e-11	0.0313915
3.125e-11	0.0256327
3.5156e-11	0.0215376
3.9063e-11	0.0240331
4.2969e-11	0.0346548
4.6875e-11	0.0470681
5.0781e-11	0.0425891
5.4688e-11	0.0165467
5.8594e-11	-0.0149345
6.25e-11	-0.0341944
6.6406e-11	-0.0306112
7.0313e-11	-0.00975167
7.4219e-11	0.0133474
7.8125e-11	0.0271044
8.2031e-11	0.0204498
8.5938e-11	-0.00040967
8.9844e-11	-0.0133349
9.375e-11	-0.0135908
9.7656e-11	-0.0072562
1.01563e-10	0.00554105
1.05469e-10	0.0164827
1.09375e-10	0.0156509
1.13281e-10	0.00976414
1.17188e-10	0.00630888
1.21094e-10	0.00784456
1.25e-10	0.015203
1.28906e-10	0.01981
1.32813e-10	0.0181463
1.36719e-10	0.0182743
1.40625e-10	0.0177624
1.44531e-10	0.0109159
1.48438e-10	0.00586098
1.52344e-10	0.00605294
1.5625e-10	0.00208579
1.60156e-10	-0.00674431
1.64063e-10	-0.0148706
1.67969e-10	-0.0194136
1.71875e-10	-0.0181979
1.75781e-10	-0.0133349
1.79688e-10	-0.00610445
1.83594e-10	-0.00021771
1.875e-10	-0.00392892
1.91406e-10	-0.0116713
1.95313e-10	-0.0110314
1.99219e-10	-0.00501668
2.03125e-10	0.00131796
2.07031e-10	0.00944421
2.10938e-10	0.0119397
2.14844e-10	0.00618091
2.1875e-10	-0.00130548
2.22656e-10	-0.0114793
2.26563e-10	-0.0167262
2.30469e-10	-0.0039929
2.34375e-10	0.0182743
2.38281e-10	0.0327352
2.42188e-10	0.0341429
2.46094e-10	0.0274883
2.5e-10	0.0183383
2.53906e-10	0.00867638
2.57813e-10	0.00413335
2.61719e-10	0.00707672
2.65625e-10	0.010532
2.69531e-10	0.0110439
2.73438e-10	0.00694875
2.77344e-10	-0.00386493
2.8125e-10	-0.0110314
2.85156e-10	-0.00207332
2.89063e-10	0.0134754
2.92969e-10	0.0201299
2.96875e-10	0.0206418
3.00781e-10	0.020002
3.04688e-10	0.0131554
3.08594e-10	0.00266167
3.125e-10	-0.00098555
3.16406e-10	-0.00162541
3.20313e-10	-0.00655235
3.24219e-10	-0.0119912
3.28125e-10	-0.0153185
3.32031e-10	-0.0117992
3.35938e-10	-0.00040967
3.39844e-10	0.00970016
3.4375e-10	0.0173785
3.47656e-10	0.0179544
3.51563e-10	0.0052851
3.55469e-10	-0.00572053
3.59375e-10	-0.00258521
3.63281e-10	0.0109159
3.67188e-10	0.0296639
3.71094e-10	0.0446367
3.75e-10	0.0425251
3.78906e-10	0.0192341
3.82813e-10	-0.0116713
3.86719e-10	-0.031315
3.90625e-10	-0.0379056
3.94531e-10	-0.0337465
3.98438e-10	-0.0141027
4.02344e-10	0.00912428
4.0625e-10	0.0187222
4.10156e-10	0.0159708
4.14063e-10	0.00317356
4.17969e-10	-0.0139748
4.21875e-10	-0.0210772
4.25781e-10	-0.0158304
4.29688e-10	-0.00252122
4.33594e-10	0.0162268
4.375e-10	0.0310716
4.41406e-10	0.0322233
4.45313e-10	0.0211537
4.49219e-10	0.0062449
4.53125e-10	-0.00776809
4.57031e-10	-0.0146146
4.60938e-10	-0.0135269
4.64844e-10	-0.0158944
4.6875e-10	-0.0238286
4.72656e-10	-0.0261321
4.76563e-10	-0.0203094
4.80469e-10	-0.0119272
4.84375e-10	-0.00181737
4.88281e-10	0.00707672
4.92188e-10	0.00419734
4.96094e-10	-0.00923978
5e-10	-0.0188377
5.03906e-10	-0.0210772
5.07813e-10	-0.0172381
5.11719e-10	-0.00700026
5.15625e-10	0.0029816
5.19531e-10	0.00586098
5.23438e-10	0.0034295
5.27344e-10	0.00272565
5.3125e-10	0.00688476
5.35156e-10	0.0107879
5.39063e-10	0.00778057
5.42969e-10	-0.00476074
5.46875e-10	-0.0197975
5.50781e-10	-0.0251724
5.54688e-10	-0.0198615
5.58594e-10	-0.00994363
5.625e-10	0.00055012
5.66406e-10	0.00150992
5.70313e-10	-0.0141027
5.74219e-10	-0.0308032
5.78125e-10	-0.0303552
5.82031e-10	-0.0183258
5.85938e-10	-0.00245723
5.89844e-10	0.014947
5.9375e-10	0.0180184
5.97656e-10	0.0062449
6.01563e-10	-0.00104954
6.05469e-10	0.00042215
6.09375e-10	0.0085484
6.13281e-10	0.0188502
6.17188e-10	0.0203219
6.21094e-10	0.0112998
6.25e-10	-0.00092156
6.28906e-10	-0.00648837
6.32813e-10	0.00291761
6.36719e-10	0.0229453
6.40625e-10	0.0342709
6.44531e-10	0.0249929
6.48438e-10	0.00042215
6.52344e-10	-0.026836
6.5625e-10	-0.0405291
6.60156e-10	-0.0331706
6.64063e-10	-0.00968768
6.67969e-10	0.0185303
6.71875e-10	0.0328632
6.75781e-10	0.0246729
6.79688e-10	0.00720469
6.83594e-10	-0.0049527
6.875e-10	-0.00341703
6.91406e-10	0.0114278
6.95313e-10	0.0251209
6.99219e-10	0.0292799
7.03125e-10	0.0268485
7.07031e-10	0.0175705
7.10938e-10	0.00771658
7.14844e-10	0.00835645
7.1875e-10	0.0137313
7.22656e-10	0.015203
7.26563e-10	0.0136673
7.30469e-10	0.00701273
7.34375e-10	3.823e-05
7.38281e-10	0.00106201
7.42188e-10	0.00419734
7.46094e-10	0.00752462
7.5e-10	0.0122596
7.53906e-10	0.00867638
7.57813e-10	-0.00367297
7.61719e-10	-0.0110314
7.65625e-10	-0.00764012
7.69531e-10	0.00195782
7.73438e-10	0.0148191
7.77344e-10	0.0269764
7.8125e-10	0.0294079
7.85156e-10	0.0238411
7.89063e-10	0.0173785
7.92969e-10	0.00886834
7.96875e-10	0.0052851
8.00781e-10	0.0119397
8.04688e-10	0.0186582
8.08594e-10	0.0177624
8.125e-10	0.00797253
8.16406e-10	-0.00834397
8.20313e-10	-0.022101
8.24219e-10	-0.0269
8.28125e-10	-0.0208853
8.32031e-10	-0.00335304
8.35938e-10	0.0159708
8.39844e-10	0.0238411
8.4375e-10	0.0159708
8.47656e-10	-0.00488871
8.51563e-10	-0.022037
8.55469e-10	-0.0190297
8.59375e-10	-0.00162541
8.63281e-10	0.0173145
8.67188e-10	0.02896
8.71094e-10	0.0246729
8.75e-10	0.00688476
8.78906e-10	-0.0123111
8.82813e-10	-0.0228688
8.86719e-10	-0.0197975
8.90625e-10	-0.0100716
8.94531e-10	-0.00463277
8.98438e-10	-0.00700026
9.02344e-10	-0.0123111
9.0625e-10	-0.0124391
9.10156e-10	-0.00738418
9.14063e-10	-0.00162541
9.17969e-10	0.00080607
9.21875e-10	-0.0063604
9.25781e-10	-0.0203094
9.29688e-10	-0.0296514
9.33594e-10	-0.0289475
9.375e-10	-0.0204374
9.41406e-10	-0.00879187
9.45313e-10	-0.00034569
9.49219e-10	0.00310957
9.53125e-10	0.00291761
9.57031e-10	0.00118998
9.60938e-10	0.00502916
9.64844e-10	0.0125156
9.6875e-10	0.0122596
9.72656e-10	0.0052851
9.76563e-10	3.823e-05
9.80469e-10	-0.00117751
9.84375e-10	0.00330153
9.88281e-10	0.010468
9.92188e-10	0.00918827
9.96094e-10	-8.974e-05
1e-09	-0.00872789
1.00391e-09	-0.0141027
1.00781e-09	-0.0121832
1.01172e-09	0.00118998
1.01562e-09	0.019682
1.01953e-09	0.028896
1.02344e-09	0.0205778
1.02734e-09	-0.00079359
1.03125e-09	-0.017622
1.03516e-09	-0.0146786
1.03906e-09	-8.974e-05
1.04297e-09	0.0131554
1.04687e-09	0.0225614
1.05078e-09	0.0211537
1.05469e-09	0.00541308
1.05859e-09	-0.0119272
1.0625e-09	-0.0183898
1.06641e-09	-0.0157024
1.07031e-09	-0.0110314
1.07422e-09	-0.00885586
1.07812e-09	-0.0100716
1.08203e-09	-0.00565655
1.08594e-09	0.00925225
1.08984e-09	0.0209617
1.09375e-09	0.0235212
1.09766e-09	0.0247369
1.10156e-09	0.0218575
1.10547e-09	0.0143072
1.10937e-09	0.0146271
1.11328e-09	0.0221775
1.11719e-09	0.0230733
1.12109e-09	0.0143711
1.125e-09	0.00163789
1.12891e-09	-0.012951
1.13281e-09	-0.0233807
1.13672e-09	-0.0219091
1.14062e-09	-0.0125671
1.14453e-09	-0.00661634
1.14844e-09	-0.0114153
1.15234e-09	-0.0206933
1.15625e-09	-0.0194776
1.16016e-09	-0.00412088
1.16406e-09	0.0153949
1.16797e-09	0.0293439
1.17187e-09	0.0327992
1.17578e-09	0.0230093
1.17969e-09	0.00496517
1.18359e-09	-0.00546459
1.1875e-09	-0.00296912
1.19141e-09	0.00304559
1.19531e-09	0.00656483
1.19922e-09	0.00355748
1.20312e-09	-0.00431283
1.20703e-09	-0.00802404
1.21094e-09	-0.00469675
1.21484e-09	0.0001662
1.21875e-09	0.00067809
1.22266e-09	-0.00136947
1.22656e-09	-0.00104954
1.23047e-09	0.00150992
1.23437e-09	0.00490119
1.23828e-09	0.00733267
1.24219e-09	0.00771658
1.24609e-09	0.00451727
1.25e-09	-0.0054006
1.25391e-09	-0.0117352
1.25781e-09	-0.00303311
1.26172e-09	0.0113638
1.26562e-09	0.0189782
1.26953e-09	0.0205138
1.27344e-09	0.0164827
1.27734e-09	0.00694875
1.28125e-09	0.00010222
1.28516e-09	-0.00207332
1.28906e-09	-0.0072562
1.29297e-09	-0.0155744
1.29687e-09	-0.0201174
1.30078e-09	-0.0188377
1.30469e-09	-0.0168541
1.30859e-09	-0.0161503
1.3125e-09	-0.0148066
1.31641e-09	-0.0143587
1.32031e-09	-0.0132709
1.32422e-09	-0.00360899
1.32812e-09	0.0162268
1.33203e-09	0.0371503
1.33594e-09	0.047516
1.33984e-09	0.0379181
1.34375e-09	0.0125795
1.34766e-09	-0.0101996
1.35156e-09	-0.0153825
1.35547e-09	-0.0021373
1.35937e-09	0.0144351
1.36328e-09	0.0190422
1.36719e-09	0.00874036
1.37109e-09	-0.00565655
1.375e-09	-0.00847194
1.37891e-09	0.00131796
1.38281e-09	0.0143711
1.38672e-09	0.019938
1.39062e-09	0.00976414
1.39453e-09	-0.00661634
1.39844e-09	-0.0155104
1.40234e-09	-0.0144227
1.40625e-09	-0.00117751
1.41016e-09	0.0144351
1.41406e-09	0.0136673
1.41797e-09	-0.00060163
1.42187e-09	-0.0112233
1.42578e-09	-0.0106475
1.42969e-09	0.00195782
1.43359e-09	0.0216656
1.4375e-09	0.029088
1.44141e-09	0.0116837
1.44531e-09	-0.01775
1.44922e-09	-0.0436004
1.45312e-09	-0.0558218
1.45703e-09	-0.0467997
1.46094e-09	-0.0261961
1.46484e-09	-0.0107755
1.46875e-09	-0.00661634
1.47266e-09	-0.0100076
1.47656e-09	-0.00802404
1.48047e-09	0.00618091
1.48437e-09	0.0257607
1.48828e-09	0.043037
1.49219e-09	0.0465562
1.49609e-09	0.0322233
1.5e-09	0.010532
1.50391e-09	-0.0101996
1.50781e-09	-0.0230608
1.51172e-09	-0.0217171
1.51562e-09	-0.0111594
1.51953e-09	0.00138194
1.52344e-09	0.0128355
1.52734e-09	0.0173145
1.53125e-09	0.0170586
1.53516e-09	0.0181463
1.53906e-09	0.0143711
1.54297e-09	0.0043893
1.54688e-09	-0.00290514
1.55078e-09	-0.00840796
1.55469e-09	-0.0155104
1.55859e-09	-0.0185178
1.5625e-09	-0.0141667
1.56641e-09	-0.00380094
1.57031e-09	0.010468
1.57422e-09	0.0224974
1.57812e-09	0.0268485
1.58203e-09	0.0215376
1.58594e-09	0.00848442
1.58984e-09	-0.00200933
1.59375e-09	0.00093404
1.59766e-09	0.015203
1.60156e-09	0.0256327
1.60547e-09	0.0206418
1.60937e-09	0.00234174
1.61328e-09	-0.0235087
1.61719e-09	-0.0462238
1.62109e-09	-0.0481434
1.625e-09	-0.0280517
1.62891e-09	-0.00124149
1.63281e-09	0.0176984
1.63672e-09	0.0188502
1.64062e-09	0.00874036
1.64453e-09	0.00163789
1.64844e-09	0.00138194
1.65234e-09	0.00982813
1.65625e-09	0.020002
1.66016e-09	0.0190422
1.66406e-09	0.0111718
1.66797e-09	0.00509315
1.67187e-09	0.00598895
1.67578e-09	0.0144991
1.67969e-09	0.0191061
1.68359e-09	0.0111079
1.6875e-09	-0.00552857
1.69141e-09	-0.0203734
1.69531e-09	-0.0243405
1.69922e-09	-0.0157024
1.70312e-09	0.00061411
1.70703e-09	0.0122596
1.71094e-09	0.0114918
1.71484e-09	0.00630888
1.71875e-09	0.00573301
1.72266e-09	0.0108519
1.72656e-09	0.0174425
1.73047e-09	0.0183383
1.73437e-09	0.0099561
1.73828e-09	-0.00303311
1.74219e-09	-0.0112873
1.74609e-09	-0.00853593
1.75e-09	0.00310957
1.75391e-09	0.0137953
1.75781e-09	0.0134114
1.76172e-09	0.00304559
1.76562e-09	-0.00732019
1.76953e-09	-0.00776809
1.77344e-09	0.00266167
1.77734e-09	0.0116837
1.78125e-09	0.0102121
1.78516e-09	0.00458126
1.78906e-09	0.00138194
1.79297e-09	0.00547706
1.79687e-09	0.0213457
1.80078e-09	0.0349107
1.80469e-09	0.0288321
1.80859e-09	0.00790854
1.8125e-09	-0.0142307
1.81641e-09	-0.0260042
1.82031e-09	-0.0171741
1.82422e-09	0.0107239
1.82812e-09	0.0358705
1.83203e-09	0.038174
1.83594e-09	0.0221135
1.83984e-09	0.00509315
1.84375e-09	-0.00200933
1.84766e-09	-0.00015373
1.85156e-09	0.00707672
1.85547e-09	0.0143072
1.85937e-09	0.0115558
1.86328e-09	-0.00188136
1.86719e-09	-0.0119272
1.87109e-09	-0.008216
1.875e-09	0.00029418
1.87891e-09	0.00336552
1.88281e-09	0.00400538
1.88672e-09	0.00374943
1.89062e-09	0.00221376
1.89453e-09	0.00573301
1.89844e-09	0.0138593
1.90234e-09	0.0143072
1.90625e-09	0.00477321
1.91016e-09	-0.00386493
1.91406e-09	-0.00578452
1.91797e-09	0.00163789
1.92187e-09	0.0134114
1.92578e-09	0.0118117
1.92969e-09	-0.00648837
1.93359e-09	-0.0245325
1.9375e-09	-0.0322108
1.94141e-09	-0.0278598
1.94531e-09	-0.0110954
1.94922e-09	0.00630888
1.95312e-09	0.00982813
1.95703e-09	-0.0007296
1.96094e-09	-0.0131429
1.96484e-09	-0.0146146
1.96875e-09	-0.00482473
1.97266e-09	0.00368545
1.97656e-09	0.00214978
1.98047e-09	-0.0054006
1.98437e-09	-0.0151905
1.98828e-09	-0.021973
1.99219e-09	-0.0151265
1.99609e-09	0.00170187
2e-09	0.00886834
2.00391e-09	0.00035816
2.00781e-09	-0.0112873
2.01172e-09	-0.0178779
2.01562e-09	-0.017686
2.01953e-09	-0.0112873
2.02344e-09	-0.00776809
2.02734e-09	-0.0137188
2.03125e-09	-0.026836
2.03516e-09	-0.0370098
2.03906e-09	-0.0319549
2.04297e-09	-0.0135269
2.04687e-09	0.00470923
2.05078e-09	0.0111718
2.05469e-09	0.00195782
2.05859e-09	-0.0169181
2.0625e-09	-0.0299073
2.06641e-09	-0.0238926
2.07031e-09	-0.00322507
2.07422e-09	0.0157149
2.07812e-09	0.0202579
2.08203e-09	0.00874036
2.08594e-09	-0.00834397
2.08984e-09	-0.0141027
2.09375e-09	-0.00194534
2.09766e-09	0.0134114
2.10156e-09	0.0164187
2.10547e-09	0.0100841
2.10937e-09	0.00368545
2.11328e-09	0.0043893
2.11719e-09	0.0165467
2.12109e-09	0.0331191
2.125e-09	0.0351667
2.12891e-09	0.0109159
2.13281e-09	-0.0240846
2.13672e-09	-0.0437924
2.14062e-09	-0.0416168
2.14453e-09	-0.0235087
2.14844e-09	0.00189383
2.15234e-09	0.0182743
2.15625e-09	0.0138593
2.16016e-09	-0.00450479
2.16406e-09	-0.0213332
2.16797e-09	-0.0295874
2.17187e-09	-0.0297154
2.17578e-09	-0.0217811
2.17969e-09	-0.0117352
2.18359e-09	-0.00226527
2.1875e-09	0.010596
2.19141e-09	0.019618
2.19531e-09	0.0165467
2.19922e-09	0.00381342
2.20312e-09	-0.0151905
2.20703e-09	-0.031315
2.21094e-09	-0.0298434
2.21484e-09	-0.0120552
2.21875e-09	0.00688476
2.22266e-09	0.0139232
2.22656e-09	0.00163789
2.23047e-09	-0.0231888
2.23437e-09	-0.040721
2.23828e-09	-0.0404011
2.24219e-09	-0.0247244
2.24609e-09	-0.00175338
2.25e-09	0.0180184
2.25391e-09	0.02896
2.25781e-09	0.0323513
2.26172e-09	0.0303677
2.26562e-09	0.024545
2.26953e-09	0.0143711
2.27344e-09	-0.0002817
2.27734e-09	-0.0133349
2.28125e-09	-0.0165342
2.28516e-09	-0.00629641
2.28906e-09	0.0143711
2.29297e-09	0.0353586
2.29687e-09	0.0422692
2.30078e-09	0.0268485
2.30469e-09	-0.00322507
2.30859e-09	-0.0300993
2.3125e-09	-0.036242
2.31641e-09	-0.0180059
2.32031e-09	0.010532
2.32422e-09	0.0296639
2.32812e-09	0.0308156
2.33203e-09	0.019746
2.33594e-09	0.00419734
2.33984e-09	-0.00655235
2.34375e-09	-0.00661634
2.34766e-09	-0.00104954
2.35156e-09	0.0081005
2.35547e-09	0.0173785
2.35937e-09	0.015203
2.36328e-09	0.00419734
2.36719e-09	-0.0049527
2.37109e-09	-0.012951
2.375e-09	-0.0212692
2.37891e-09	-0.0243405
2.38281e-09	-0.0164702
2.38672e-09	-2.576e-05
2.39062e-09	0.0131554
2.39453e-09	0.0161628
2.39844e-09	0.00982813
2.40234e-09	-0.00207332
2.40625e-09	-0.0100076
2.41016e-09	-0.00802404
2.41406e-09	0.00061411
2.41797e-09	0.00688476
2.42187e-09	0.00227775
2.42578e-09	-0.0107115
2.42969e-09	-0.0231248
2.43359e-09	-0.0263881
2.4375e-09	-0.0107115
2.44141e-09	0.0186582
2.44531e-09	0.038238
2.44922e-09	0.0354226
2.45312e-09	0.0171226
2.45703e-09	-0.00661634
2.46094e-09	-0.0241486
2.46484e-09	-0.0253643
2.46875e-09	-0.013079
2.47266e-09	0.00234174
2.47656e-09	0.0118757
2.48047e-09	0.00899631
2.48437e-09	-0.00066562
2.48828e-09	-0.00386493
2.49219e-09	0.0034295
2.49609e-09	0.0157149
2.5e-09	0.0265285
2.50391e-09	0.0310076
2.50781e-09	0.0277443
2.51172e-09	0.0178264
2.51562e-09	0.00598895
2.51953e-09	0.00150992
2.52344e-09	0.0043893
2.52734e-09	0.0062449
2.53125e-09	0.0062449
2.53516e-09	0.00566902
2.53906e-09	0.00234174
2.54297e-09	-0.00463277
2.54687e-09	-0.0114153
2.55078e-09	-0.00955971
2.55469e-09	-0.00239325
2.55859e-09	-0.00111352
2.5625e-09	-0.00194534
2.56641e-09	0.00061411
2.57031e-09	0.00023019
2.57422e-09	-0.00444081
2.57812e-09	-0.00335304
2.58203e-09	0.0029816
2.58594e-09	0.00125397
2.58984e-09	-0.00808802
2.59375e-09	-0.012695
2.59766e-09	-0.0108394
2.60156e-09	-0.00770411
2.60547e-09	-0.00482473
2.60938e-09	-0.00412088
2.61328e-09	-0.00751215
2.61719e-09	-0.0146146
2.62109e-09	-0.022037
2.625e-09	-0.0237007
2.62891e-09	-0.0146786
2.63281e-09	0.0015739
2.63672e-09	0.0109799
2.64062e-09	0.00662882
2.64453e-09	-0.00527263
2.64844e-09	-0.0198615
2.65234e-09	-0.0285636
2.65625e-09	-0.0242766
2.66016e-09	-0.0149985
2.66406e-09	-0.00783208
2.66797e-09	-0.00245723
2.67187e-09	-0.00130548
2.67578e-09	-0.00373696
2.67969e-09	-0.0049527
2.68359e-09	-0.00450479
2.6875e-09	-0.00226527
2.69141e-09	0.00451727
2.69531e-09	0.0135393
2.69922e-09	0.019554
2.70312e-09	0.0187222
2.70703e-09	0.00906029
2.71094e-09	-0.00194534
2.71484e-09	-0.00808802
2.71875e-09	-0.00674431
2.72266e-09	0.00477321
2.72656e-09	0.0174425
2.73047e-09	0.0208338
2.73437e-09	0.0127075
2.73828e-09	-0.00418486
2.74219e-09	-0.0164062
2.74609e-09	-0.0132069
2.75e-09	-0.00060163
2.75391e-09	0.0131554
2.75781e-09	0.0217936
2.76172e-09	0.0181463
2.76562e-09	0.00675679
2.76953e-09	0.00163789
2.77344e-09	0.00650084
2.77734e-09	0.0111079
2.78125e-09	0.00694875
2.78516e-09	-0.00053765
2.78906e-09	-0.00386493
2.79297e-09	-0.0039929
2.79687e-09	-0.00124149
2.80078e-09	0.00522112
2.80469e-09	0.010276
2.80859e-09	0.00886834
2.8125e-09	0.00509315
2.81641e-09	0.00579699
2.82031e-09	0.00502916
2.82422e-09	-0.00156143
2.82812e-09	-0.00936775
2.83203e-09	-0.022165
2.83594e-09	-0.0367539
2.83984e-09	-0.0365619
2.84375e-09	-0.0211412
2.84766e-09	-0.00316108
2.85156e-09	0.00944421
2.85547e-09	0.0117477
2.85937e-09	0.0052851
2.86328e-09	-0.00232926
2.86719e-09	-0.00412088
2.87109e-09	0.00195782
2.875e-09	0.01034
2.87891e-09	0.0135393
2.88281e-09	0.010404
2.88672e-09	0.00451727
2.89062e-09	0.00490119
2.89453e-09	0.0121316
2.89844e-09	0.0119397
2.90234e-09	0.00278964
2.90625e-09	-0.00431283
2.91016e-09	-0.00975167
2.91406e-09	-0.0125671
2.91797e-09	-0.00668033
2.92187e-09	0.00234174
2.92578e-09	0.00918827
2.92969e-09	0.0139872
2.93359e-09	0.0141792
2.9375e-09	0.0130914
2.94141e-09	0.0139232
2.94531e-09	0.0125156
2.94922e-09	0.00733267
2.95312e-09	-2.576e-05
2.95703e-09	-0.00367297
2.96094e-09	0.00317356
2.96484e-09	0.015011
2.96875e-09	0.0208338
2.97266e-09	0.0155229
2.97656e-09	0.00087005
2.98047e-09	-0.0125031
2.98437e-09	-0.0168541
2.98828e-09	-0.0119912
2.99219e-09	-0.0002817
2.99609e-09	0.00816449
3e-09	0.00656483
3.00391e-09	0.00406937
3.00781e-09	0.00656483
3.01172e-09	0.0112998
3.01562e-09	0.0154589
3.01953e-09	0.0107239
3.02344e-09	-0.00706424
3.02734e-09	-0.0263241
3.03125e-09	-0.0348983
3.03516e-09	-0.0321469
3.03906e-09	-0.0234447
3.04297e-09	-0.0142307
3.04687e-09	-0.0110314
3.05078e-09	-0.0185178
3.05469e-09	-0.0296514
3.05859e-09	-0.0321469
3.0625e-09	-0.0232528
3.06641e-09	-0.00744816
3.07031e-09	0.00874036
3.07422e-09	0.0203219
3.07812e-09	0.024289
3.08203e-09	0.0192981
3.08594e-09	0.00918827
3.08984e-09	-0.00136947
3.09375e-09	-0.0105835
3.09766e-09	-0.0151265
3.10156e-09	-0.0148706
3.10547e-09	-0.0117992
3.10937e-09	-0.00226527
3.11328e-09	0.0135393
3.11719e-09	0.0251209
3.12109e-09	0.0274244
3.125e-09	0.0230093
3.12891e-09	0.0127715
3.13281e-09	-0.0030971
3.13672e-09	-0.0189657
3.14062e-09	-0.0240846
3.14453e-09	-0.0160863
3.14844e-09	-0.00386493
3.15234e-09	0.00714071
3.15625e-09	0.0137953
3.16016e-09	0.0121316
3.16406e-09	0.00656483
3.16797e-09	0.00214978
3.17187e-09	-0.0063604
3.17578e-09	-0.0142307
3.17969e-09	-0.0100716
3.18359e-09	-2.576e-05
3.1875e-09	0.00861239
3.19141e-09	0.0173785
3.19531e-09	0.0203859
3.19922e-09	0.0121316
3.20312e-09	-0.00117751
3.20703e-09	-0.0086639
3.21094e-09	-0.00668033
3.21484e-09	0.00534909
3.21875e-09	0.0263366
3.22266e-09	0.0435489
3.22656e-09	0.0457884
3.23047e-09	0.0342709
3.23437e-09	0.015011
3.23828e-09	0.00067809
3.24219e-09	-0.00111352
3.24609e-09	0.00381342
3.25e-09	0.00938023
3.25391e-09	0.0119397
3.25781e-09	0.0107239
3.26172e-09	0.00925225
3.26562e-09	0.00790854
3.26953e-09	0.0076526
3.27344e-09	0.00906029
3.27734e-09	0.00490119
3.28125e-09	-0.00200933
3.28516e-09	0.00240572
3.28906e-09	0.0167387
3.29297e-09	0.0311356
3.29687e-09	0.0374062
3.30078e-09	0.024545
3.30469e-09	-0.0016894
3.30859e-09	-0.0198615
3.3125e-09	-0.0240846
3.31641e-09	-0.017686
3.32031e-09	-0.00085758
3.32422e-09	0.0113638
3.32812e-09	0.00189383
3.33203e-09	-0.0148066
3.33594e-09	-0.0178139
3.33984e-09	-0.00815201
3.34375e-09	0.0114918
3.34766e-09	0.0310716
3.35156e-09	0.0306237
3.35547e-09	0.0145631
3.35937e-09	0.00170187
3.36328e-09	-0.00079359
3.36719e-09	0.00957218
3.37109e-09	0.0256967
3.375e-09	0.0315835
3.37891e-09	0.0210257
3.38281e-09	-0.00060163
3.38672e-09	-0.0189017
3.39062e-09	-0.0202454
3.39453e-09	-0.00533662
3.39844e-09	0.0134114
3.40234e-09	0.0226254
3.40625e-09	0.0156509
3.41016e-09	-0.00546459
3.41406e-09	-0.0254923
3.41797e-09	-0.026772
3.42187e-09	-0.0119272
3.42578e-09	0.00547706
3.42969e-09	0.0209617
3.43359e-09	0.0304957
3.4375e-09	0.0271684
3.44141e-09	0.0184023
3.44531e-09	0.0136673
3.44922e-09	0.00982813
3.45312e-09	0.00739665
3.45703e-09	0.010532
3.46094e-09	0.0138593
3.46484e-09	0.0111718
3.46875e-09	0.00349349
3.47266e-09	-0.00431283
3.47656e-09	-0.00668033
3.48047e-09	-0.00162541
3.48437e-09	0.00822847
3.48828e-09	0.0193621
3.49219e-09	0.0280002
3.49609e-09	0.0297279
3.5e-09	0.0214096
3.50391e-09	0.00982813
3.50781e-09	0.00874036
3.51172e-09	0.0181463
3.51562e-09	0.0262086
3.51953e-09	0.0269764
3.52344e-09	0.0182103
3.52734e-09	-0.00181737
3.53125e-09	-0.0238286
3.53516e-09	-0.0329787
3.53906e-09	-0.0256203
3.54297e-09	-0.00687229
3.54687e-09	0.0141792
3.55078e-09	0.0251848
3.55469e-09	0.0218575
3.55859e-09	0.0120037
3.5625e-09	0.00598895
3.56641e-09	0.0101481
3.57031e-09	0.0203219
3.57422e-09	0.0265285
3.57812e-09	0.024161
3.58203e-09	0.0153949
3.58594e-09	0.00464524
3.58984e-09	-0.00079359
3.59375e-09	0.0048372
3.59766e-09	0.0136033
3.60156e-09	0.0132194
3.60547e-09	0.00547706
3.60937e-09	-0.00085758
3.61328e-09	-0.00239325
3.61719e-09	0.00272565
3.62109e-09	0.0158428
3.625e-09	0.0285121
3.62891e-09	0.0304317
3.63281e-09	0.0233292
3.63672e-09	0.0148191
3.64062e-09	0.0107239
3.64453e-09	0.0118117
3.64844e-09	0.0112358
3.65234e-09	0.00259768
3.65625e-09	-0.0134629
3.66016e-09	-0.0262601
3.66406e-09	-0.022037
3.66797e-09	-0.00188136
3.67188e-09	0.0201939
3.67578e-09	0.0317114
3.67969e-09	0.0277443
3.68359e-09	0.0111718
3.6875e-09	-0.00546459
3.69141e-09	-0.0112873
3.69531e-09	-0.00456878
3.69922e-09	0.01034
3.70312e-09	0.0212177
3.70703e-09	0.0200659
3.71094e-09	0.0101481
3.71484e-09	-0.00341703
3.71875e-09	-0.013079
3.72266e-09	-0.0145506
3.72656e-09	-0.0144227
3.73047e-09	-0.0162783
3.73437e-09	-0.0132069
3.73828e-09	-0.00021771
3.74219e-09	0.0157149
3.74609e-09	0.0236492
3.75e-09	0.0180824
3.75391e-09	0.00227775
3.75781e-09	-0.012887
3.76172e-09	-0.0190297
3.76562e-09	-0.0133989
3.76953e-09	-8.974e-05
3.77344e-09	0.00899631
3.77734e-09	0.0107239
3.78125e-09	0.00842043
3.78516e-09	0.00413335
3.78906e-09	0.00547706
3.79297e-09	0.0141792
3.79687e-09	0.0185303
3.80078e-09	0.0121956
3.80469e-09	0.00304559
3.80859e-09	0.00118998
3.8125e-09	0.0101481
3.81641e-09	0.0272324
3.82031e-09	0.0409255
3.82422e-09	0.038174
3.82812e-09	0.020002
3.83203e-09	-0.00380094
3.83594e-09	-0.0226129
3.83984e-09	-0.0249804
3.84375e-09	-0.00815201
3.84766e-09	0.0158428
3.85156e-09	0.0297279
3.85547e-09	0.0283202
3.85937e-09	0.0185942
3.86328e-09	0.00893232
3.86719e-09	0.00387741
3.87109e-09	0.00061411
3.875e-09	-0.00232926
3.87891e-09	-0.00175338
3.88281e-09	0.00099802
3.88672e-09	0.00029418
3.89062e-09	-0.00508067
3.89453e-09	-0.00757613
3.89844e-09	-0.00418486
3.90234e-09	-0.0021373
3.90625e-09	0.00055012
3.91016e-09	0.00726868
3.91406e-09	0.00912428
3.91797e-09	0.00618091
3.92187e-09	0.0062449
3.92578e-09	0.00707672
3.92969e-09	0.00541308
3.93359e-09	0.00150992
3.9375e-09	-0.00162541
3.94141e-09	-0.00047366
3.94531e-09	0.00240572
3.94922e-09	0.00598895
3.95312e-09	0.00931624
3.95703e-09	0.0066928
3.96094e-09	0.00048613
3.96484e-09	-0.00476074
3.96875e-09	-0.0100716
3.97266e-09	-0.0104555
3.97656e-09	0.00106201
3.98047e-09	0.0175065
3.98437e-09	0.0248649
3.98828e-09	0.0187862
3.99219e-09	0.00592497
3.99609e-09	-0.00316108
4e-09	-0.00232926
4.00391e-09	0.00963617
4.00781e-09	0.0256327
4.01172e-09	0.0297279
4.01562e-09	0.0180184
4.01953e-09	0.00208579
4.02344e-09	-0.0114793
4.02734e-09	-0.017302
4.03125e-09	-0.00789607
4.03516e-09	0.00989212
4.03906e-09	0.0208338
4.04297e-09	0.0208338
4.04687e-09	0.0117477
4.05078e-09	-0.00220129
4.05469e-09	-0.0133989
4.05859e-09	-0.0170461
4.0625e-09	-0.0103915
4.06641e-09	0.00618091
4.07031e-09	0.024225
4.07422e-09	0.0332471
4.07812e-09	0.0309436
4.08203e-09	0.019682
4.08594e-09	0.0015739
4.08984e-09	-0.0154464
4.09375e-09	-0.0199895
4.09766e-09	-0.00757613
4.10156e-09	0.0159708
4.10547e-09	0.0360625
4.10937e-09	0.0427811
4.11328e-09	0.0356786
4.11719e-09	0.0190422
4.12109e-09	0.0062449
4.125e-09	0.00739665
4.12891e-09	0.0156509
4.13281e-09	0.0228173
4.13672e-09	0.0239691
4.14062e-09	0.0139872
4.14453e-09	-0.00476074
4.14844e-09	-0.0167262
4.15234e-09	-0.013079
4.15625e-09	-0.00277716
4.16016e-09	0.00714071
4.16406e-09	0.0118757
4.16797e-09	0.00534909
4.17187e-09	-0.00348101
4.17578e-09	-0.00303311
4.17969e-09	0.00362146
4.18359e-09	0.00976414
4.1875e-09	0.0115558
4.19141e-09	0.00554105
4.19531e-09	-0.00520864
4.19922e-09	-0.0111594
4.20312e-09	-0.00520864
4.20703e-09	0.00797253
4.21094e-09	0.0173785
4.21484e-09	0.0183383
4.21875e-09	0.00637287
4.22266e-09	-0.0133989
4.22656e-09	-0.0197335
4.23047e-09	-0.0054006
4.23437e-09	0.0142432
4.23828e-09	0.024609
4.24219e-09	0.0254408
4.24609e-09	0.0187862
4.25e-09	0.00349349
4.25391e-09	-0.0116073
4.25781e-09	-0.01743
4.26172e-09	-0.0162143
4.26562e-09	-0.00981565
4.26953e-09	-0.00322507
4.27344e-09	-0.00264919
4.27734e-09	-0.00418486
4.28125e-09	-0.00380094
4.28516e-09	-0.00431283
4.28906e-09	-0.00476074
4.29297e-09	-0.00175338
4.29687e-09	0.00202181
4.30078e-09	0.00317356
4.30469e-09	0.00336552
4.30859e-09	0.00400538
4.3125e-09	0.00330153
4.31641e-09	0.00118998
4.32031e-09	0.00010222
4.32422e-09	0.00189383
4.32812e-09	0.0025337
4.33203e-09	-0.00226527
4.33594e-09	-0.00706424
4.33984e-09	-0.0117992
4.34375e-09	-0.0228688
4.34766e-09	-0.0334906
4.35156e-09	-0.0354102
4.35547e-09	-0.0282437
4.35937e-09	-0.0114793
4.36328e-09	0.0117477
4.36719e-09	0.0295999
4.37109e-09	0.0355506
4.375e-09	0.0342709
4.37891e-09	0.0276803
4.38281e-09	0.0175065
4.38672e-09	0.0108519
4.39062e-09	0.00682077
4.39453e-09	-0.00040967
4.39844e-09	-0.00789607
4.40234e-09	-0.0109674
4.40625e-09	-0.0115433
4.41016e-09	-0.00738418
4.41406e-09	0.00419734
4.41797e-09	0.0114918
4.42187e-09	0.00861239
4.42578e-09	0.00598895
4.42969e-09	0.00989212
4.43359e-09	0.0189782
4.4375e-09	0.0310076
4.44141e-09	0.0390699
4.44531e-09	0.0328632
4.44922e-09	0.0157149
4.45312e-09	0.00509315
4.45703e-09	0.0052851
4.46094e-09	0.0119397
4.46484e-09	0.0247369
4.46875e-09	0.0317754
4.47266e-09	0.0247369
4.47656e-09	0.0123876
4.48047e-09	0.00061411
4.48437e-09	-0.0054006
4.48828e-09	0.00010222
4.49219e-09	0.0085484
4.49609e-09	0.0111079
4.5e-09	0.010276
4.50391e-09	0.00778057
4.50781e-09	0.00541308
4.51172e-09	0.00790854
4.51562e-09	0.015075
4.51953e-09	0.0204498
4.52344e-09	0.0212177
4.52734e-09	0.0220495
4.53125e-09	0.0206418
4.53516e-09	0.0134754
4.53906e-09	0.00746064
4.54297e-09	0.00272565
4.54687e-09	-0.00258521
4.55078e-09	-0.0016894
4.55469e-09	0.00125397
4.55859e-09	-0.00066562
4.5625e-09	-0.00322507
4.56641e-09	-0.0021373
4.57031e-09	0.00176586
4.57422e-09	0.00413335
4.57812e-09	0.00400538
4.58203e-09	0.00656483
4.58594e-09	0.00931624
4.58984e-09	0.00662882
4.59375e-09	0.00739665
4.59766e-09	0.0156509
4.60156e-09	0.0192981
4.60547e-09	0.0143072
4.60937e-09	0.0062449
4.61328e-09	-0.00136947
4.61719e-09	-0.00418486
4.62109e-09	-0.00136947
4.625e-09	0.00458126
4.62891e-09	0.0144991
4.63281e-09	0.0207058
4.63672e-09	0.0146911
4.64062e-09	0.00611693
4.64453e-09	0.00445328
4.64844e-09	0.00886834
4.65234e-09	0.020002
4.65625e-09	0.0316475
4.66016e-09	0.0280642
4.66406e-09	0.010532
4.66797e-09	-0.00181737
4.67187e-09	-0.00207332
4.67578e-09	0.00202181
4.67969e-09	0.00867638
4.68359e-09	0.0165467
4.6875e-09	0.015011
4.69141e-09	0.00381342
4.69531e-09	-0.00405689
4.69922e-09	-0.00668033
4.70312e-09	-0.00776809
4.70703e-09	-0.00482473
4.71094e-09	0.00138194
4.71484e-09	0.0062449
4.71875e-09	0.00688476
4.72266e-09	0.00125397
4.72656e-09	-0.0072562
4.73047e-09	-0.012823
4.73438e-09	-0.0153825
4.73828e-09	-0.0144867
4.74219e-09	-0.00444081
4.74609e-09	0.0120676
4.75e-09	0.0212177
4.75391e-09	0.0169306
4.75781e-09	0.0062449
4.76172e-09	-0.00444081
4.76562e-09	-0.0100076
4.76953e-09	-0.00732019
4.77344e-09	-0.00188136
4.77734e-09	-0.00060163
4.78125e-09	-0.0063604
4.78516e-09	-0.0118632
4.78906e-09	-0.00776809
4.79297e-09	-0.00040967
4.79687e-09	0.00227775
4.80078e-09	-0.00021771
4.80469e-09	-0.00751215
4.80859e-09	-0.0121832
4.8125e-09	-0.008216
4.81641e-09	0.00176586
4.82031e-09	0.0139232
4.82422e-09	0.0226894
4.82812e-09	0.0201299
4.83203e-09	0.0062449
4.83594e-09	-0.0068083
4.83984e-09	-0.0103915
4.84375e-09	-0.00373696
4.84766e-09	0.00771658
4.85156e-09	0.0113638
4.85547e-09	0.00842043
4.85937e-09	0.0113638
4.86328e-09	0.0188502
4.86719e-09	0.0238411
4.87109e-09	0.0236492
4.875e-09	0.0123876
4.87891e-09	-0.00847194
4.88281e-09	-0.0208213
4.88672e-09	-0.0125031
4.89062e-09	0.0099561
4.89453e-09	0.0310076
4.89844e-09	0.0370863
4.90234e-09	0.0239691
4.90625e-09	-0.00124149
4.91016e-09	-0.022357
4.91406e-09	-0.0237007
4.91797e-09	-0.00437682
4.92187e-09	0.0217936
4.92578e-09	0.0390059
4.92969e-09	0.0374062
4.93359e-09	0.0186582
4.9375e-09	-0.00258521
4.94141e-09	-0.0118632
4.94531e-09	-0.00853593
4.94922e-09	-0.00290514
4.95312e-09	-0.00360899
4.95703e-09	-0.0101996
4.96094e-09	-0.0208213
4.96484e-09	-0.0308671
4.96875e-09	-0.031443
4.97266e-09	-0.0208213
4.97656e-09	-0.00610445
4.98047e-09	0.00592497
4.98437e-09	0.00963617
4.98828e-09	0.00259768
4.99219e-09	-0.00552857
4.99609e-09	-0.00469675
5e-09	0.00362146
5.00391e-09	0.0133474
5.00781e-09	0.0177624
5.01172e-09	0.0121316
5.01562e-09	-0.00098555
5.01953e-09	-0.0104555
5.02344e-09	-0.00898383
5.02734e-09	-0.00098555
5.03125e-09	0.00758861
5.03516e-09	0.00912428
5.03906e-09	-0.00060163
5.04297e-09	-0.00975167
5.04687e-09	-0.00648837
5.05078e-09	0.00861239
5.05469e-09	0.0287681
5.05859e-09	0.0416933
5.0625e-09	0.0400296
5.06641e-09	0.0249289
5.07031e-09	0.00330153
5.07422e-09	-0.00597648
5.07812e-09	0.00566902
5.08203e-09	0.0217296
5.08594e-09	0.0251848
5.08984e-09	0.0111718
5.09375e-09	-0.0137828
5.09766e-09	-0.031699
5.10156e-09	-0.0322108
5.10547e-09	-0.0208853
5.10937e-09	-0.00642438
5.11328e-09	0.00509315
5.11719e-09	0.00874036
5.12109e-09	0.00317356
5.125e-09	-0.00181737
5.12891e-09	0.00240572
5.13281e-09	0.00842043
5.13672e-09	0.00803651
5.14062e-09	0.00291761
5.14453e-09	-0.0039929
5.14844e-09	-0.00930376
5.15234e-09	-0.0116713
5.15625e-09	-0.0118632
5.16016e-09	-0.013079
5.16406e-09	-0.0195416
5.16797e-09	-0.0241486
5.17187e-09	-0.0203094
5.17578e-09	-0.0149345
5.17969e-09	-0.00732019
5.18359e-09	0.00656483
5.1875e-09	0.014947
5.19141e-09	0.0125156
5.19531e-09	0.00778057
5.19922e-09	0.001126
5.20312e-09	-0.0072562
5.20703e-09	-0.0105195
5.21094e-09	-0.00827998
5.21484e-09	3.823e-05
5.21875e-09	0.0159708
5.22266e-09	0.0272324
5.22656e-09	0.0231373
5.23047e-09	0.00982813
5.23437e-09	-0.00437682
5.23828e-09	-0.0135269
5.24219e-09	-0.013015
5.24609e-09	-0.00482473
5.25e-09	0.00330153
5.25391e-09	0.00381342
5.25781e-09	-0.00181737
5.26172e-09	-0.00674431
5.26562e-09	-0.00885586
5.26953e-09	-0.00604046
5.27344e-09	0.00240572
5.27734e-09	0.00611693
5.28125e-09	-0.00136947
5.28516e-09	-0.00981565
5.28906e-09	-0.0124391
5.29297e-09	-0.0113513
5.29687e-09	-0.00450479
5.30078e-09	0.00464524
5.30469e-09	0.00675679
5.30859e-09	0.00464524
5.3125e-09	0.00362146
5.31641e-09	0.001126
5.32031e-09	-0.00194534
5.32422e-09	-0.00322507
5.32812e-09	-0.00584851
5.33203e-09	-0.0110314
5.33594e-09	-0.0163422
5.33984e-09	-0.0166622
5.34375e-09	-0.00668033
5.34766e-09	0.00957218
5.35156e-09	0.0229453
5.35547e-09	0.0304317
5.35937e-09	0.0302397
5.36328e-09	0.0224974
5.36719e-09	0.015139
5.37109e-09	0.0110439
5.375e-09	0.00592497
5.37891e-09	0.0029816
5.38281e-09	0.00381342
5.38672e-09	0.00080607
5.39062e-09	-0.00527263
5.39453e-09	-0.00469675
5.39844e-09	0.00618091
5.40234e-09	0.019938
5.40625e-09	0.0271684
5.41016e-09	0.0250569
5.41406e-09	0.0142432
5.41797e-09	-0.0021373
5.42187e-09	-0.0187737
5.42578e-09	-0.0310591
5.42969e-09	-0.0325948
5.43359e-09	-0.0235087
5.4375e-09	-0.0142947
5.44141e-09	-0.0100076
5.44531e-09	-0.00712823
5.44922e-09	-0.00514466
5.45312e-09	-0.00552857
5.45703e-09	-0.00226527
5.46094e-09	0.00605294
5.46484e-09	0.0121316
5.46875e-09	0.015011
5.47266e-09	0.0148191
5.47656e-09	0.00886834
5.48047e-09	0.00067809
5.48437e-09	-0.00533662
5.48828e-09	-0.00572053
5.49219e-09	0.0001662
5.49609e-09	0.00618091
5.5e-09	0.00707672
5.50391e-09	0.00195782
5.50781e-09	-0.00648837
5.51172e-09	-0.0108394
5.51562e-09	-0.0102636
5.51953e-09	-0.0100076
5.52344e-09	-0.00546459
5.52734e-09	0.0043893
5.53125e-09	0.0107879
5.53516e-09	0.0128995
5.53906e-09	0.0121316
5.54297e-09	0.00598895
5.54687e-09	-0.00450479
5.55078e-09	-0.0147426
5.55469e-09	-0.0179419
5.55859e-09	-0.00987964
5.5625e-09	0.0025337
5.56641e-09	0.00925225
5.57031e-09	0.00944421
5.57422e-09	0.00106201
5.57812e-09	-0.017558
5.58203e-09	-0.0352182
5.58594e-09	-0.0399532
5.58984e-09	-0.026964
5.59375e-09	-0.00328905
5.59766e-09	0.0130914
5.60156e-09	0.0138593
5.60547e-09	0.00496517
5.60937e-09	-0.00706424
5.61328e-09	-0.0169821
5.61719e-09	-0.0165982
5.62109e-09	-0.00783208
5.625e-09	-0.00661634
5.62891e-09	-0.0178139
5.63281e-09	-0.0303552
5.63672e-09	-0.0338745
5.64062e-09	-0.0251724
5.64453e-09	-0.0072562
5.64844e-09	0.0134754
5.65234e-09	0.0276163
5.65625e-09	0.0267845
5.66016e-09	0.0157789
5.66406e-09	0.00470923
5.66797e-09	-0.00258521
5.67187e-09	-0.00117751
5.67578e-09	0.00662882
5.67969e-09	0.00931624
5.68359e-09	0.0043893
5.6875e-09	-0.00572053
5.69141e-09	-0.017558
5.69531e-09	-0.0246605
5.69922e-09	-0.0224849
5.70312e-09	-0.0110954
5.70703e-09	0.00221376
5.71094e-09	0.00989212
5.71484e-09	0.010276
5.71875e-09	0.0034295
5.72266e-09	-0.00597648
5.72656e-09	-0.0125031
5.73047e-09	-0.0149345
5.73437e-09	-0.0106475
5.73828e-09	-0.00130548
5.74219e-09	0.00803651
5.74609e-09	0.0160348
5.75e-09	0.0176344
5.75391e-09	0.0106599
5.75781e-09	0.00010222
5.76172e-09	-0.00770411
5.76562e-09	-0.00456878
5.76953e-09	0.00829246
5.77344e-09	0.0220495
5.77734e-09	0.0341429
5.78125e-09	0.0388779
5.78516e-09	0.0286401
5.78906e-09	0.00874036
5.79297e-09	-0.00827998
5.79688e-09	-0.0109674
5.80078e-09	0.00067809
5.80469e-09	0.0157149
5.80859e-09	0.0249929
5.8125e-09	0.0189142
5.81641e-09	-0.00092156
5.82031e-09	-0.0164702
5.82422e-09	-0.0203734
5.82812e-09	-0.0140387
5.83203e-09	0.00182985
5.83594e-09	0.0186582
5.83984e-09	0.0272964
5.84375e-09	0.0228813
5.84766e-09	0.0115558
5.85156e-09	0.00630888
5.85547e-09	0.0099561
5.85937e-09	0.0200659
5.86328e-09	0.0315195
5.86719e-09	0.0344628
5.87109e-09	0.0276803
5.875e-09	0.0189782
5.87891e-09	0.0128355
5.88281e-09	0.00714071
5.88672e-09	0.00445328
5.89062e-09	0.00586098
5.89453e-09	0.00374943
5.89844e-09	-0.00207332
5.90234e-09	-0.0039929
5.90625e-09	0.00170187
5.91016e-09	0.0107239
5.91406e-09	0.0144351
5.91797e-09	0.0136673
5.92187e-09	0.0156509
5.92578e-09	0.0175705
5.92969e-09	0.0173785
5.93359e-09	0.0180824
5.9375e-09	0.0163547
5.94141e-09	0.0111079
5.94531e-09	0.00406937
5.94922e-09	-0.003545
5.95312e-09	-0.00482473
5.95703e-09	-0.00015373
5.96094e-09	0.00125397
5.96484e-09	3.823e-05
5.96875e-09	0.00227775
5.97266e-09	0.00726868
5.97656e-09	0.0116837
5.98047e-09	0.015139
5.98437e-09	0.0201299
5.98828e-09	0.0223694
5.99219e-09	0.0131554
5.99609e-09	-0.00207332
6e-09	-0.0111594
6.00391e-09	-0.00962369
6.00781e-09	-8.974e-05
6.01172e-09	0.00874036
6.01562e-09	0.00970016
6.01953e-09	0.00477321
6.02344e-09	-0.00264919
6.02734e-09	-0.0111594
6.03125e-09	-0.0131429
6.03516e-09	-0.00149744
6.03906e-09	0.0160988
6.04297e-09	0.0274244
6.04687e-09	0.0328632
6.05078e-09	0.0350387
6.05469e-09	0.0257607
6.05859e-09	0.00944421
6.0625e-09	0.00138194
6.06641e-09	-0.00162541
6.07031e-09	-0.0054006
6.07422e-09	-0.00668033
6.07812e-09	-0.00712823
6.08203e-09	-0.0100076
6.08594e-09	-0.0133349
6.08984e-09	-0.0137188
6.09375e-09	-0.00802404
6.09766e-09	0.00336552
6.10156e-09	0.0123236
6.10547e-09	0.00970016
6.10937e-09	-0.00188136
6.11328e-09	-0.0111594
6.11719e-09	-0.0132709
6.12109e-09	-0.00770411
6.125e-09	0.00643686
6.12891e-09	0.0193621
6.13281e-09	0.0153309
6.13672e-09	-0.00220129
6.14062e-09	-0.0164702
6.14453e-09	-0.0231888
6.14844e-09	-0.0212052
6.15234e-09	-0.00744816
6.15625e-09	0.00784456
6.16016e-09	0.0124516
6.16406e-09	0.00893232
6.16797e-09	0.00522112
6.17187e-09	0.00502916
6.17578e-09	0.0125156
6.17969e-09	0.0254408
6.18359e-09	0.0327992
6.1875e-09	0.0299198
6.19141e-09	0.0212817
6.19531e-09	0.0115558
6.19922e-09	0.00330153
6.20312e-09	-0.00040967
6.20703e-09	0.00214978
6.21094e-09	0.00720469
6.21484e-09	0.0116197
6.21875e-09	0.0134754
6.22266e-09	0.00829246
6.22656e-09	-0.00284115
6.23047e-09	-0.0121192
6.23437e-09	-0.0135908
6.23828e-09	-0.00700026
6.24219e-09	0.00541308
6.24609e-09	0.0183383
6.25e-09	0.0253768
6.25391e-09	0.0236492
6.25781e-09	0.00970016
6.26172e-09	-0.0121832
6.26562e-09	-0.027028
6.26953e-09	-0.0294594
6.27344e-09	-0.0258122
6.27734e-09	-0.0183258
6.28125e-09	-0.00853593
6.28516e-09	-0.0039929
6.28906e-09	-0.00642438
6.29297e-09	-0.0125671
6.29687e-09	-0.022101
6.30078e-09	-0.0294594
6.30469e-09	-0.026964
6.30859e-09	-0.0134629
6.3125e-09	0.00291761
6.31641e-09	0.0116197
6.32031e-09	0.0123876
6.32422e-09	0.00874036
6.32812e-09	0.00023019
6.33203e-09	-0.00642438
6.33594e-09	-0.00226527
6.33984e-09	0.00829246
6.34375e-09	0.0160988
6.34766e-09	0.01981
6.35156e-09	0.0136033
6.35547e-09	-0.00508067
6.35937e-09	-0.0247244
6.36328e-09	-0.0366899
6.36719e-09	-0.0368179
6.37109e-09	-0.0231888
6.375e-09	-0.0049527
6.37891e-09	0.00586098
6.38281e-09	0.00406937
6.38672e-09	-0.00796005
6.39062e-09	-0.0212692
6.39453e-09	-0.0232528
6.39844e-09	-0.0110314
6.40234e-09	0.00413335
6.40625e-09	0.0135393
6.41016e-09	0.0153949
6.41406e-09	0.0102121
6.41797e-09	0.00554105
6.42187e-09	0.00771658
6.42578e-09	0.0143711
6.42969e-09	0.0180824
6.43359e-09	0.0163547
6.4375e-09	0.0125156
6.44141e-09	0.00688476
6.44531e-09	0.00445328
6.44922e-09	0.00822847
6.45312e-09	0.0110439
6.45703e-09	0.0144351
6.46094e-09	0.0192341
6.46484e-09	0.0176344
6.46875e-09	0.0136673
6.47266e-09	0.0142432
6.47656e-09	0.0185942
6.48047e-09	0.024353
6.48437e-09	0.0251848
6.48828e-09	0.0192981
6.49219e-09	0.0120676
6.49609e-09	0.00515713
6.5e-09	-0.00316108
6.50391e-09	-0.0138468
6.50781e-09	-0.0217171
6.51172e-09	-0.0215251
6.51562e-09	-0.0186458
6.51953e-09	-0.0157664
6.52344e-09	-0.00955971
6.52734e-09	-0.00316108
6.53125e-09	0.00138194
6.53516e-09	0.00579699
6.53906e-09	0.00944421
6.54297e-09	0.0117477
6.54687e-09	0.0081005
6.55078e-09	-0.00463277
6.55469e-09	-0.0192216
6.55859e-09	-0.0258762
6.5625e-09	-0.0187097
6.56641e-09	-0.00092156
6.57031e-09	0.015203
6.57422e-09	0.0237771
6.57812e-09	0.0210257
6.58203e-09	0.00208579
6.58594e-09	-0.0182618
6.58984e-09	-0.017494
6.59375e-09	0.00259768
6.59766e-09	0.0238411
6.60156e-09	0.0308796
6.60547e-09	0.0168666
6.60937e-09	-0.00975167
6.61328e-09	-0.0308671
6.61719e-09	-0.0329787
6.62109e-09	-0.0145506
6.625e-09	0.0118757
6.62891e-09	0.0258887
6.63281e-09	0.0191061
6.63672e-09	0.00138194
6.64062e-09	-0.0125671
6.64453e-09	-0.00923978
6.64844e-09	0.0126435
6.65234e-09	0.0361905
6.65625e-09	0.0439968
6.66016e-09	0.0308156
6.66406e-09	0.00547706
6.66797e-09	-0.0136548
6.67187e-09	-0.0123111
6.67578e-09	0.00381342
6.67969e-09	0.020002
6.68359e-09	0.0278083
6.6875e-09	0.019746
6.69141e-09	0.00150992
6.69531e-09	-0.0110954
6.69922e-09	-0.0137188
6.70312e-09	-0.00827998
6.70703e-09	-8.974e-05
6.71094e-09	0.00163789
6.71484e-09	-0.00591249
6.71875e-09	-0.0148066
6.72266e-09	-0.0147426
6.72656e-09	-0.00834397
6.73047e-09	-0.00220129
6.73437e-09	0.00221376
6.73828e-09	0.00138194
6.74219e-09	-0.00136947
6.74609e-09	3.823e-05
6.75e-09	0.00541308
6.75391e-09	0.0141152
6.75781e-09	0.0191701
6.76172e-09	0.0132834
6.76562e-09	0.00234174
6.76953e-09	-0.00386493
6.77344e-09	-0.00290514
6.77734e-09	0.00509315
6.78125e-09	0.0166107
6.78516e-09	0.0180184
6.78906e-09	0.00451727
6.79297e-09	-0.0113513
6.79687e-09	-0.0212052
6.80078e-09	-0.0262601
6.80469e-09	-0.0265161
6.80859e-09	-0.0201174
6.8125e-09	-0.00981565
6.81641e-09	-0.00207332
6.82031e-09	0.00477321
6.82422e-09	0.0128995
6.82812e-09	0.015011
6.83203e-09	0.00944421
6.83594e-09	0.00285363
6.83984e-09	-0.0016894
6.84375e-09	-0.00424885
6.84766e-09	-0.00207332
6.85156e-09	0.00726868
6.85547e-09	0.0134114
6.85938e-09	0.00541308
6.86328e-09	-0.00668033
6.86719e-09	-0.0104555
6.87109e-09	-0.00693627
6.875e-09	0.0025337
6.87891e-09	0.0124516
6.88281e-09	0.0121956
6.88672e-09	0.00093404
6.89062e-09	-0.012695
6.89453e-09	-0.0207573
6.89844e-09	-0.0206933
6.90234e-09	-0.0142307
6.90625e-09	-0.00405689
6.91016e-09	0.00662882
6.91406e-09	0.0148191
6.91797e-09	0.0181463
6.92187e-09	0.0184023
6.92578e-09	0.0159708
6.92969e-09	0.00605294
6.93359e-09	-0.00700026
6.9375e-09	-0.0141667
6.94141e-09	-0.0153185
6.94531e-09	-0.0107755
6.94922e-09	0.00074208
6.95312e-09	0.0124516
6.95703e-09	0.0161628
6.96094e-09	0.0138593
6.96484e-09	0.00803651
6.96875e-09	-0.00245723
6.97266e-09	-0.012823
6.97656e-09	-0.017302
6.98047e-09	-0.0153185
6.98437e-09	-0.00955971
6.98828e-09	-0.00322507
6.99219e-09	0.00605294
6.99609e-09	0.0156509
7e-09	0.0136673
7.00391e-09	0.0015739
7.00781e-09	-0.00591249
7.01172e-09	-0.00501668
7.01562e-09	-0.00092156
7.01953e-09	0.00822847
7.02344e-09	0.0184023
7.02734e-09	0.0180184
7.03125e-09	0.0100201
7.03516e-09	0.00214978
7.03906e-09	-0.00776809
7.04297e-09	-0.0178139
7.04687e-09	-0.026644
7.05078e-09	-0.0398252
7.05469e-09	-0.0505749
7.05859e-09	-0.0450081
7.0625e-09	-0.022037
7.06641e-09	0.00586098
7.07031e-09	0.0219855
7.07422e-09	0.0185942
7.07812e-09	-0.00239325
7.08203e-09	-0.0293955
7.08594e-09	-0.0396333
7.08984e-09	-0.0243405
7.09375e-09	0.001126
7.09766e-09	0.0185942
7.10156e-09	0.0166747
7.10547e-09	-0.00450479
7.10937e-09	-0.0318909
7.11328e-09	-0.0496151
7.11719e-09	-0.0464798
7.12109e-09	-0.0224849
7.125e-09	0.00931624
7.12891e-09	0.0293439
7.13281e-09	0.0277443
7.13672e-09	0.00912428
7.14062e-09	-0.017302
7.14453e-09	-0.0339385
7.14844e-09	-0.0275399
7.15234e-09	-0.00341703
7.15625e-09	0.0269764
7.16016e-09	0.0482199
7.16406e-09	0.04758
7.16797e-09	0.0283842
7.17187e-09	0.00061411
7.17578e-09	-0.0226129
7.17969e-09	-0.0253003
7.18359e-09	-0.00533662
7.1875e-09	0.0211537
7.19141e-09	0.0352307
7.19531e-09	0.0279362
7.19922e-09	0.00701273
7.20312e-09	-0.0115433
7.20703e-09	-0.0160863
7.21094e-09	-0.00015373
7.21484e-09	0.0265285
7.21875e-09	0.042909
7.22266e-09	0.0381101
7.22656e-09	0.0157789
7.23047e-09	-0.012631
7.23437e-09	-0.0347063
7.23828e-09	-0.0379056
7.24219e-09	-0.0226129
7.24609e-09	-0.00469675
7.25e-09	0.00893232
7.25391e-09	0.0187222
7.25781e-09	0.0175065
7.26172e-09	0.0081005
7.26562e-09	0.00310957
7.26953e-09	0.00470923
7.27344e-09	0.010468
7.27734e-09	0.0193621
7.28125e-09	0.024353
7.28516e-09	0.0194261
7.28906e-09	0.00893232
7.29297e-09	-0.00277716
7.29687e-09	-0.0117352
7.30078e-09	-0.00930376
7.30469e-09	0.00317356
7.30859e-09	0.0169306
7.3125e-09	0.024609
7.31641e-09	0.0176984
7.32031e-09	-0.00124149
7.32422e-09	-0.0184538
7.32812e-09	-0.026708
7.33203e-09	-0.0234447
7.33594e-09	-0.0109674
7.33984e-09	-0.00476074
7.34375e-09	-0.0149985
7.34766e-09	-0.0336185
7.35156e-09	-0.0460319
7.35547e-09	-0.0398892
7.35937e-09	-0.0172381
7.36328e-09	0.0085484
7.36719e-09	0.0271684
7.37109e-09	0.0299198
7.375e-09	0.0136033
7.37891e-09	-0.00936775
7.38281e-09	-0.0212692
7.38672e-09	-0.0144867
7.39062e-09	0.00310957
7.39453e-09	0.0147551
7.39844e-09	0.015075
7.40234e-09	0.0109799
7.40625e-09	0.00502916
7.41016e-09	-0.00124149
7.41406e-09	-0.00367297
7.41797e-09	-0.0049527
7.42187e-09	-0.008216
7.42578e-09	-0.00923978
7.42969e-09	-0.00706424
7.43359e-09	-0.00770411
7.4375e-09	-0.0117352
7.44141e-09	-0.013015
7.44531e-09	-0.0112233
7.44922e-09	-0.0091118
7.45312e-09	-0.00271318
7.45703e-09	0.0052851
7.46094e-09	0.00534909
7.46484e-09	-0.00290514
7.46875e-09	-0.0148706
7.47266e-09	-0.0235727
7.47656e-09	-0.0203734
7.48047e-09	-0.00578452
7.48437e-09	0.0111718
7.48828e-09	0.019618
7.49219e-09	0.0139232
7.49609e-09	-0.00060163
7.5e-09	-0.0101996
7.50391e-09	-0.00616844
7.50781e-09	0.00554105
7.51172e-09	0.0141792
7.51562e-09	0.0141152
7.51953e-09	0.010468
7.52344e-09	0.0126435
7.52734e-09	0.0169306
7.53125e-09	0.0155869
7.53516e-09	0.00886834
7.53906e-09	-0.00296912
7.54297e-09	-0.0165342
7.54687e-09	-0.0260042
7.55078e-09	-0.0255563
7.55469e-09	-0.0123751
7.55859e-09	0.00272565
7.5625e-09	0.00848442
7.56641e-09	0.0085484
7.57031e-09	0.00803651
7.57422e-09	0.00874036
7.57812e-09	0.0131554
7.58203e-09	0.0167387
7.58594e-09	0.0124516
7.58984e-09	0.00464524
7.59375e-09	-0.00060163
7.59766e-09	-0.0030971
7.60156e-09	-0.00098555
7.60547e-09	0.0015739
7.60937e-09	-0.00412088
7.61328e-09	-0.0114153
7.61719e-09	-0.012631
7.62109e-09	-0.012631
7.625e-09	-0.0138468
7.62891e-09	-0.017302
7.63281e-09	-0.0249804
7.63672e-09	-0.0292675
7.64062e-09	-0.0216531
7.64453e-09	-0.00373696
7.64844e-09	0.0127715
7.65234e-09	0.0136673
7.65625e-09	-0.00367297
7.66016e-09	-0.0300353
7.66406e-09	-0.0489113
7.66797e-09	-0.0421927
7.67187e-09	-0.00847194
7.67578e-09	0.0309436
7.67969e-09	0.0537227
7.68359e-09	0.0509073
7.6875e-09	0.0257607
7.69141e-09	-0.00642438
7.69531e-09	-0.0243405
7.69922e-09	-0.0200535
7.70312e-09	-0.00802404
7.70703e-09	-0.00348101
7.71094e-09	-0.00693627
7.71484e-09	-0.0142947
7.71875e-09	-0.0205653
7.72266e-09	-0.0183898
7.72656e-09	-0.0086639
7.73047e-09	-0.00117751
7.73437e-09	-0.00245723
7.73828e-09	-0.0105835
7.74219e-09	-0.0166622
7.74609e-09	-0.0114153
7.75e-09	0.00349349
7.75391e-09	0.0164187
7.75781e-09	0.0166107
7.76172e-09	0.00387741
7.76562e-09	-0.0133349
7.76953e-09	-0.0277958
7.77344e-09	-0.0326588
7.77734e-09	-0.0238926
7.78125e-09	-0.00962369
7.78516e-09	0.00144593
7.78906e-09	0.00554105
7.79297e-09	0.00080607
7.79687e-09	-0.00584851
7.80078e-09	-0.0105195
7.80469e-09	-0.013015
[truncated: 510,001+ more rows]

## Sheet: Fig3f
Position of beam [mm]	Beam diameter D4s (H) [mm]	Beam diameter D4s (V) [mm]
-19.6	631.6	478.8
-18.6	604.2	418.1
-17.6	591.4	404.2
-16.6	561.8	407
-15.6	526.4	359.3
-14.6	501.4	334.7
-13.6	471.7	302.6
-12.6	453.7	287.6
-11.6	434.7	271.7
-10.6	421.9	259.7
-9.6	394.9	232.7
-8.6	365.2	206.4
-7.6	350.5	174.3
-6.6	326.8	147.1
-5.6	305.2	125.3
-4.6	292.9	108.6
-3.6	273.7	96.2
-2.6	249.7	78.2
-1.6	228.1	66.1
-0.6	205.3	56.3
0	199.8	55.3
0.4	181.8	56.2
1.4	161.1	62.5
2.4	138.2	82.1
3.4	135.5	110.4
4.4	100.3	116.6
5.4	79.6	151
6.4	74	188.1
7.4	66.8	229.2
8.4	51.8	276.7
9.4	70.3	279.3
10.4	82.8	295.2
11.4	107.1	316.1
12.4	125.9	333.4
13.4	146.2	349
14.4	180.7	374.4
15.4	176.3	407.5
16.4	208.8	426.1
17.4	224.8	449.9
18.4	255.1	475.3
19.4	287.3	507.9
20.4	311.6	550.2
21.4	331	573.3
22.4	346.2	596.2
23.4	369.7	625.8
24.4	392.1	654.9
25.4	429	687.9
26.4	437.6	723.5
27.4	474.4	718.9
28.4	491.3	737.6
29.4	530.7	777.4

## Sheet: Fig4(time)
Pulse width of gate driver 2.788758 [ns]				Pulse width of gate driver 3.173184 [ns]				Pulse width of gate driver 3.301326 [ns]				Pulse width of gate driver 3.55761 [ns]				Pulse width of gate driver 3.942036 [ns]				Pulse width of gate driver 4.070178 [ns]				Pulse width of gate driver 4.326462 [ns]				Pulse width of gate driver 4.710888 [ns]				Pulse width of gate driver 5.095314 [ns]				Pulse width of gate driver 5.223456 [ns]
Time [ns]	Power total [W]	Power pulse [W]	Power tail [W]	Time [ns]	Power total [W]	Power pulse [W]	Power tail [W]	Time [ns]	Power total [W]	Power pulse [W]	Power tail [W]	Time [ns]	Power total [W]	Power pulse [W]	Power tail [W]	Time [ns]	Power total [W]	Power pulse [W]	Power tail [W]	Time [ns]	Power total [W]	Power pulse [W]	Power tail [W]	Time [ns]	Power total [W]	Power pulse [W]	Power tail [W]	Time [ns]	Power total [W]	Power pulse [W]	Power tail [W]	Time [ns]	Power total [W]	Power pulse [W]	Power tail [W]	Time [ns]	Power total [W]	Power pulse [W]	Power tail [W]
0.133399	0.0058052	0.0058052	0	0.154317		0	0	0.12288		0	0	0.166793				0.154317		0	0	0.148058				0.11655				0.152232				0.11655				0.103846
0.135498	0.00387014	0.00387014	0	0.1564	0.014084	0.014084	0	0.124987	0.00858098	0.00858098	0	0.168867	0.0173077	0.0173077	0	0.1564	0.0250255	0.0250255	0	0.150146	0.0322081	0.0322081	0	0.118662	0.0259399	0.0259399	0	0.154317	0.0223095	0.0223095	0	0.118662	0.0160428	0.0160428	0	0.105967	0.0181019	0.0181019	0
0.137595	0.00276439	0.00276439	0	0.158482	0.0111047	0.0111047	0	0.127092	0.0128715	0.0128715	0	0.17094	0.0137875	0.0137875	0	0.158482	0.0210091	0.0210091	0	0.152232	0.0251626	0.0251626	0	0.120772	0.0280271	0.0280271	0	0.1564	0.0161315	0.0161315	0	0.120772	0.00956938	0.00956938	0	0.108087	0.022704	0.022704	0
0.139691	0.00331726	0.00331726	0	0.160562	0.00866706	0.00866706	0	0.129196	0.0142123	0.0142123	0	0.173011	0.0143742	0.0143742	0	0.160562	0.0169926	0.0169926	0	0.154317	0.0224786	0.0224786	0	0.12288	0.0247473	0.0247473	0	0.158482	0.0164747	0.0164747	0	0.12288	0.0143541	0.0143541	0	0.110205	0.0269994	0.0269994	0
0.141785	0.00110575	0.00110575	0	0.162641	0.00920875	0.00920875	0	0.131298	0.00831283	0.00831283	0	0.175081	0.00880053	0.00880053	0	0.162641	0.0191553	0.0191553	0	0.1564	0.0187881	0.0187881	0	0.124987	0.0196786	0.0196786	0	0.160562	0.016818	0.016818	0	0.124987	0.00928793	0.00928793	0	0.112322	0.0349765	0.0349765	0
0.143877	0.000276439	0.000276439	0	0.164718	0.0089379	0.0089379	0	0.133399	0.0144804	0.0144804	0	0.177149	0.0178944	0.0178944	0	0.164718	0.028424	0.028424	0	0.158482	0.0258336	0.0258336	0	0.127092	0.0211694	0.0211694	0	0.162641	0.0106399	0.0106399	0	0.127092	0.0146355	0.0146355	0	0.114437	0.02117	0.02117	0
0.145968	0.00856959	0.00856959	0	0.166793	0.0108338	0.0108338	0	0.135498	0.00938546	0.00938546	0	0.179215	0.0111473	0.0111473	0	0.166793	0.0222449	0.0222449	0	0.160562	0.0395892	0.0395892	0	0.129196	0.0181878	0.0181878	0	0.164718	0.0192205	0.0192205	0	0.129196	0.0121025	0.0121025	0	0.11655	0.0282266	0.0282266	0
0.148058	0.00746384	0.00746384	0	0.168867	0.0100213	0.0100213	0	0.137595	0.0126033	0.0126033	0	0.18128	0.0152542	0.0152542	0	0.168867	0.0225539	0.0225539	0	0.162641	0.0241561	0.0241561	0	0.131298	0.0193804	0.0193804	0	0.166793	0.0164747	0.0164747	0	0.131298	0.0154799	0.0154799	0	0.118662	0.0239313	0.0239313	0
0.150146	0.00608164	0.00608164	0	0.17094	0.0111047	0.0111047	0	0.139691	0.0104581	0.0104581	0	0.183344	0.0149609	0.0149609	0	0.17094	0.0225539	0.0225539	0	0.164718	0.0271756	0.0271756	0	0.133399	0.0187841	0.0187841	0	0.168867	0.0123561	0.0123561	0	0.133399	0.014917	0.014917	0	0.120772	0.027613	0.027613	0
0.152232	0.00552877	0.00552877	0	0.173011	0.0100213	0.0100213	0	0.141785	0.0160893	0.0160893	0	0.185406	0.0120274	0.0120274	0	0.173011	0.0265703	0.0265703	0	0.166793	0.0288531	0.0288531	0	0.135498	0.016697	0.016697	0	0.17094	0.0264282	0.0264282	0	0.135498	0.0154799	0.0154799	0	0.12288	0.0141133	0.0141133	0
0.154317	0.00276439	0.00276439	0	0.175081	0.0146257	0.0146257	0	0.143877	0.0147486	0.0147486	0	0.187466	0.00968058	0.00968058	0	0.175081	0.0176105	0.0176105	0	0.168867	0.0416022	0.0416022	0	0.137595	0.0175915	0.0175915	0	0.173011	0.013729	0.013729	0	0.137595	0.0171686	0.0171686	0	0.124987	0.0297607	0.0297607	0
0.1564	0.0071874	0.0071874	0	0.177149	0.0165216	0.0165216	0	0.145968	0.0198435	0.0198435	0	0.189526	0.0170144	0.0170144	0	0.177149	0.0265703	0.0265703	0	0.17094	0.0402602	0.0402602	0	0.139691	0.0199767	0.0199767	0	0.175081	0.0267715	0.0267715	0	0.139691	0.0146355	0.0146355	0	0.127092	0.0233177	0.0233177	0
0.158482	0.00746384	0.00746384	0	0.179215	0.0138131	0.0138131	0	0.148058	0.0176983	0.0176983	0	0.191583	0.015841	0.015841	0	0.179215	0.0262613	0.0262613	0	0.173011	0.0389182	0.0389182	0	0.141785	0.0268344	0.0268344	0	0.177149	0.0243689	0.0243689	0	0.141785	0.014917	0.014917	0	0.129196	0.0331356	0.0331356	0
0.160562	0.00276439	0.00276439	0	0.18128	0.0102921	0.0102921	0	0.150146	0.0211843	0.0211843	0	0.193639	0.015841	0.015841	0	0.18128	0.0234807	0.0234807	0	0.175081	0.0375762	0.0375762	0	0.143877	0.0247473	0.0247473	0	0.179215	0.0346656	0.0346656	0	0.143877	0.0126654	0.0126654	0	0.131298	0.02117	0.02117	0
0.162641	0.0035937	0.0035937	0	0.183344	0.0184175	0.0184175	0	0.152232	0.0252066	0.0252066	0	0.195694	0.0120274	0.0120274	0	0.183344	0.0305867	0.0305867	0	0.177149	0.0426087	0.0426087	0	0.145968	0.0286234	0.0286234	0	0.18128	0.0257418	0.0257418	0	0.145968	0.0227976	0.0227976	0	0.133399	0.0199427	0.0199427	0
0.164718	0.00414657	0.00414657	0	0.185406	0.0135423	0.0135423	0	0.154317	0.0235977	0.0235977	0	0.197747	0.0170144	0.0170144	0	0.185406	0.0312046	0.0312046	0	0.179215	0.0352276	0.0352276	0	0.148058	0.0256418	0.0256418	0	0.183344	0.0315766	0.0315766	0	0.148058	0.0208275	0.0208275	0	0.135498	0.0159542	0.0159542	0
0.166793	0.0035937	0.0035937	0	0.187466	0.0186883	0.0186883	0	0.1564	0.0230614	0.0230614	0	0.199799	0.015841	0.015841	0	0.187466	0.0253345	0.0253345	0	0.18128	0.0308661	0.0308661	0	0.150146	0.0226602	0.0226602	0	0.185406	0.0343224	0.0343224	0	0.150146	0.0270194	0.0270194	0	0.137595	0.022704	0.022704	0
0.168867	0.00331726	0.00331726	0	0.189526	0.0138131	0.0138131	0	0.158482	0.0284245	0.0284245	0	0.201849	0.0176011	0.0176011	0	0.189526	0.0256434	0.0256434	0	0.183344	0.0369052	0.0369052	0	0.152232	0.0265363	0.0265363	0	0.187466	0.0332927	0.0332927	0	0.152232	0.0182944	0.0182944	0	0.139691	0.0334424	0.0334424	0
0.17094	0.00746384	0.00746384	0	0.191583	0.0113755	0.0113755	0	0.160562	0.0260111	0.0260111	0	0.203898	0.015841	0.015841	0	0.191583	0.0256434	0.0256434	0	0.185406	0.0392537	0.0392537	0	0.154317	0.0274307	0.0274307	0	0.189526	0.0374114	0.0374114	0	0.154317	0.0219533	0.0219533	0	0.141785	0.0337492	0.0337492	0
0.173011	0.00469945	0.00469945	0	0.193639	0.010563	0.010563	0	0.162641	0.0187709	0.0187709	0	0.205946	0.0134942	0.0134942	0	0.193639	0.0296599	0.0296599	0	0.187466	0.0288531	0.0288531	0	0.1564	0.0277289	0.0277289	0	0.191583	0.0278011	0.0278011	0	0.1564	0.0250493	0.0250493	0	0.143877	0.0217836	0.0217836	0
0.175081	0.00691096	0.00691096	0	0.195694	0.00920875	0.00920875	0	0.164718	0.0281564	0.0281564	0	0.207992	0.0140808	0.0140808	0	0.195694	0.029042	0.029042	0	0.189526	0.0372407	0.0372407	0	0.158482	0.0330958	0.0330958	0	0.193639	0.0295173	0.0295173	0	0.158482	0.0180129	0.0180129	0	0.145968	0.0297607	0.0297607	0
0.177149	0.00967534	0.00967534	0	0.197747	0.0148965	0.0148965	0	0.166793	0.0262793	0.0262793	0	0.210036	0.0170144	0.0170144	0	0.197747	0.0420181	0.0420181	0	0.191583	0.0375762	0.0375762	0	0.160562	0.0274307	0.0274307	0	0.195694	0.0284876	0.0284876	0	0.160562	0.0261751	0.0261751	0	0.148058	0.0371242	0.0371242	0
0.179215	0	0	0	0.199799	0.0113755	0.0113755	0	0.168867	0.0217206	0.0217206	0	0.212079	0.0126141	0.0126141	0	0.199799	0.0383107	0.0383107	0	0.193639	0.0402602	0.0402602	0	0.162641	0.0238528	0.0238528	0	0.197747	0.0387843	0.0387843	0	0.162641	0.0199831	0.0199831	0	0.150146	0.0331356	0.0331356	0
0.18128	0.00304082	0.00304082	0	0.201849	0.0059586	0.0059586	0	0.17094	0.0214525	0.0214525	0	0.214121	0.00968058	0.00968058	0	0.201849	0.0346032	0.0346032	0	0.195694	0.0452927	0.0452927	0	0.164718	0.0277289	0.0277289	0	0.199799	0.0326063	0.0326063	0	0.164718	0.0211089	0.0211089	0	0.152232	0.0279198	0.0279198	0
0.183344	0.00856959	0.00856959	0	0.203898	0.0108338	0.0108338	0	0.173011	0.0230614	0.0230614	0	0.216161	0.0129074	0.0129074	0	0.203898	0.0389286	0.0389286	0	0.197747	0.0456282	0.0456282	0	0.166793	0.0238528	0.0238528	0	0.201849	0.0264282	0.0264282	0	0.166793	0.0273009	0.0273009	0	0.154317	0.0309879	0.0309879	0
0.185406	0.00304082	0.00304082	0	0.205946	0.0127297	0.0127297	0	0.175081	0.0268156	0.0268156	0	0.2182	0.0170144	0.0170144	0	0.205946	0.035839	0.035839	0	0.199799	0.0466347	0.0466347	0	0.168867	0.0292197	0.0292197	0	0.203898	0.0374114	0.0374114	0	0.168867	0.0261751	0.0261751	0	0.1564	0.0236245	0.0236245	0
0.187466	0.0127162	0.0127162	0	0.207992	0.0132714	0.0132714	0	0.177149	0.0294971	0.0294971	0	0.220238	0.0187745	0.0187745	0	0.207992	0.0364569	0.0364569	0	0.201849	0.0466347	0.0466347	0	0.17094	0.0259399	0.0259399	0	0.205946	0.0380979	0.0380979	0	0.17094	0.0247678	0.0247678	0	0.158482	0.0291471	0.0291471	0
0.189526	0.0105047	0.0105047	0	0.210036	0.0211259	0.0211259	0	0.179215	0.0211843	0.0211843	0	0.222274	0.022588	0.022588	0	0.210036	0.036148	0.036148	0	0.203898	0.0533447	0.0533447	0	0.173011	0.0304124	0.0304124	0	0.207992	0.0514836	0.0514836	0	0.173011	0.0247678	0.0247678	0	0.160562	0.0248517	0.0248517	0
0.191583	0.00635808	0.00635808	0	0.212079	0.0170633	0.0170633	0	0.18128	0.0238659	0.0238659	0	0.224308	0.022588	0.022588	0	0.212079	0.0398554	0.0398554	0	0.205946	0.0624033	0.0624033	0	0.175081	0.0283252	0.0283252	0	0.210036	0.0449623	0.0449623	0	0.175081	0.0273009	0.0273009	0	0.162641	0.0322152	0.0322152	0
0.193639	0.00193507	0.00193507	0	0.214121	0.0151673	0.0151673	0	0.183344	0.0222569	0.0222569	0	0.226341	0.0231747	0.0231747	0	0.214121	0.0389286	0.0389286	0	0.207992	0.0627388	0.0627388	0	0.177149	0.0304124	0.0304124	0	0.212079	0.0435894	0.0435894	0	0.177149	0.0340557	0.0340557	0	0.164718	0.0322152	0.0322152	0
0.195694	0.00138219	0.00138219	0	0.216161	0.0170633	0.0170633	0	0.185406	0.0225251	0.0225251	0	0.228373	0.0184811	0.0184811	0	0.216161	0.0401644	0.0401644	0	0.210036	0.0795138	0.0795138	0	0.179215	0.0313068	0.0313068	0	0.214121	0.0353521	0.0353521	0	0.179215	0.0379961	0.0379961	0	0.166793	0.0386582	0.0386582	0
0.197747	0.00663452	0.00663452	0	0.2182	0.0089379	0.0089379	0	0.187466	0.0230614	0.0230614	0	0.230404	0.0222947	0.0222947	0	0.2182	0.0401644	0.0401644	0	0.212079	0.0889079	0.0889079	0	0.18128	0.0256418	0.0256418	0	0.216161	0.0446191	0.0446191	0	0.18128	0.0363073	0.0363073	0	0.168867	0.0309879	0.0309879	0
0.199799	0.00884603	0.00884603	0	0.220238	0.0127297	0.0127297	0	0.189526	0.0281564	0.0281564	0	0.232433	0.0249348	0.0249348	0	0.220238	0.042945	0.042945	0	0.214121	0.103334	0.103334	0	0.183344	0.0301142	0.0301142	0	0.2182	0.0463352	0.0463352	0	0.183344	0.0396848	0.0396848	0	0.17094	0.0420332	0.0420332	0
0.201849	0.00691096	0.00691096	0	0.222274	0.0159799	0.0159799	0	0.191583	0.0260111	0.0260111	0	0.23446	0.0222947	0.0222947	0	0.222274	0.0423271	0.0423271	0	0.216161	0.0986375	0.0986375	0	0.185406	0.039059	0.039059	0	0.220238	0.0511403	0.0511403	0	0.185406	0.0391219	0.0391219	0	0.173011	0.038965	0.038965	0
0.203898	0.00746384	0.00746384	0	0.224308	0.0148965	0.0148965	0	0.193639	0.0235977	0.0235977	0	0.236487	0.016721	0.016721	0	0.224308	0.0457256	0.0457256	0	0.2182	0.115077	0.115077	0	0.187466	0.0384627	0.0384627	0	0.222274	0.05217	0.05217	0	0.187466	0.0343372	0.0343372	0	0.175081	0.0401923	0.0401923	0
0.205946	0.00635808	0.00635808	0	0.226341	0.014084	0.014084	0	0.195694	0.0235977	0.0235977	0	0.238511	0.0170144	0.0170144	0	0.226341	0.0444898	0.0444898	0	0.220238	0.1238	0.1238	0	0.189526	0.0480038	0.0480038	0	0.224308	0.0435894	0.0435894	0	0.189526	0.0422179	0.0422179	0	0.177149	0.0457149	0.0457149	0
0.207992	0.00663452	0.00663452	0	0.228373	0.0173341	0.0173341	0	0.197747	0.0321787	0.0321787	0	0.240535	0.0190678	0.0190678	0	0.228373	0.05036	0.05036	0	0.222274	0.151982	0.151982	0	0.191583	0.0474075	0.0474075	0	0.226341	0.0456488	0.0456488	0	0.191583	0.035463	0.035463	0	0.179215	0.0444876	0.0444876	0
0.210036	0.00525233	0.00525233	0	0.230404	0.0208551	0.0208551	0	0.199799	0.0337876	0.0337876	0	0.242557	0.022588	0.022588	0	0.230404	0.0509779	0.0509779	0	0.224308	0.16708	0.16708	0	0.193639	0.0444259	0.0444259	0	0.228373	0.0501107	0.0501107	0	0.193639	0.0416549	0.0416549	0	0.18128	0.0512375	0.0512375	0
0.212079	0.00469945	0.00469945	0	0.232433	0.0135423	0.0135423	0	0.201849	0.0297653	0.0297653	0	0.244578	0.0211213	0.0211213	0	0.232433	0.0491242	0.0491242	0	0.226341	0.19761	0.19761	0	0.195694	0.046513	0.046513	0	0.230404	0.0562887	0.0562887	0	0.195694	0.038559	0.038559	0	0.183344	0.0582942	0.0582942	0
0.214121	0.00608164	0.00608164	0	0.23446	0.0230219	0.0230219	0	0.203898	0.0316424	0.0316424	0	0.246597	0.0266949	0.0266949	0	0.23446	0.0577749	0.0577749	0	0.228373	0.238877	0.238877	0	0.197747	0.0554578	0.0554578	0	0.232433	0.0470217	0.0470217	0	0.197747	0.0416549	0.0416549	0	0.185406	0.0702598	0.0702598	0
0.216161	0.00663452	0.00663452	0	0.236487	0.026272	0.026272	0	0.205946	0.0394189	0.0394189	0	0.248615	0.027575	0.027575	0	0.236487	0.057157	0.057157	0	0.230404	0.286518	0.286518	0	0.199799	0.0435314	0.0435314	0	0.23446	0.0528565	0.0528565	0	0.199799	0.0408106	0.0408106	0	0.187466	0.0708734	0.0708734	0
0.2182	0.00801671	0.00801671	0	0.238511	0.0219385	0.0219385	0	0.207992	0.0453183	0.0453183	0	0.250632	0.0316819	0.0316819	0	0.238511	0.0654989	0.0654989	0	0.232433	0.345231	0.345231	0	0.201849	0.0488983	0.0488983	0	0.236487	0.0504539	0.0504539	0	0.201849	0.0495356	0.0495356	0	0.189526	0.0668849	0.0668849	0
0.220238	0.00856959	0.00856959	0	0.240535	0.0189592	0.0189592	0	0.210036	0.0458546	0.0458546	0	0.252648	0.0264016	0.0264016	0	0.240535	0.0688974	0.0688974	0	0.23446	0.400589	0.400589	0	0.203898	0.0518799	0.0518799	0	0.238511	0.0617803	0.0617803	0	0.203898	0.0506614	0.0506614	0	0.191583	0.0902026	0.0902026	0
0.222274	0.0105047	0.0105047	0	0.242557	0.0246469	0.0246469	0	0.212079	0.0506814	0.0506814	0	0.254662	0.0243481	0.0243481	0	0.242557	0.0849632	0.0849632	0	0.236487	0.480103	0.480103	0	0.205946	0.0676823	0.0676823	0	0.240535	0.0727634	0.0727634	0	0.205946	0.0422179	0.0422179	0	0.193639	0.0874412	0.0874412	0
0.224308	0.00995178	0.00995178	0	0.244578	0.0257303	0.0257303	0	0.214121	0.0528267	0.0528267	0	0.256674	0.0302152	0.0302152	0	0.244578	0.0951588	0.0951588	0	0.238511	0.562636	0.562636	0	0.207992	0.0682787	0.0682787	0	0.242557	0.0737932	0.0737932	0	0.207992	0.0512243	0.0512243	0	0.195694	0.101248	0.101248	0
0.226341	0.00746384	0.00746384	0	0.246597	0.0219385	0.0219385	0	0.216161	0.0606032	0.0606032	0	0.258686	0.021708	0.021708	0	0.246597	0.103501	0.103501	0	0.240535	0.660602	0.660602	0	0.210036	0.076329	0.076329	0	0.244578	0.0717338	0.0717338	0	0.210036	0.0520687	0.0520687	0	0.197747	0.123338	0.123338	0
0.228373	0.0105047	0.0105047	0	0.248615	0.0241053	0.0241053	0	0.2182	0.0732065	0.0732065	0	0.260696	0.0246415	0.0246415	0	0.248615	0.122038	0.122038	0	0.242557	0.783396	0.783396	0	0.212079	0.0670861	0.0670861	0	0.246597	0.0892381	0.0892381	0	0.212079	0.0526316	0.0526316	0	0.199799	0.13469	0.13469	0
0.230404	0.0138219	0.0138219	0	0.250632	0.0278971	0.0278971	0	0.220238	0.0678434	0.0678434	0	0.262704	0.0266949	0.0266949	0	0.250632	0.13038	0.13038	0	0.244578	0.927662	0.927662	0	0.214121	0.0834849	0.0834849	0	0.248615	0.102281	0.102281	0	0.214121	0.0627639	0.0627639	0	0.201849	0.140826	0.140826	0
0.232433	0.00801671	0.00801671	0	0.252648	0.0335848	0.0335848	0	0.222274	0.0863461	0.0863461	0	0.264712	0.0249348	0.0249348	0	0.252648	0.155405	0.155405	0	0.246597	1.08065	1.08065	0	0.216161	0.091237	0.091237	0	0.250632	0.112234	0.112234	0	0.216161	0.0731776	0.0731776	0	0.203898	0.165985	0.165985	0
0.23446	0.0135455	0.0135455	0	0.254662	0.029793	0.029793	0	0.224308	0.0941226	0.0941226	0	0.266718	0.0261082	0.0261082	0	0.254662	0.176723	0.176723	0	0.248615	1.23532	1.23532	0	0.2182	0.115984	0.115984	0	0.252648	0.125963	0.125963	0	0.2182	0.0692372	0.0692372	0	0.205946	0.187155	0.187155	0
0.236487	0.0121633	0.0121633	0	0.256674	0.0308764	0.0308764	0	0.226341	0.113698	0.113698	0	0.268723	0.0249348	0.0249348	0	0.256674	0.200513	0.200513	0	0.250632	1.40911	1.40911	0	0.220238	0.118668	0.118668	0	0.254662	0.14587	0.14587	0	0.220238	0.0776809	0.0776809	0	0.207992	0.219984	0.219984	0
0.238511	0.0160334	0.0160334	0	0.258686	0.0289805	0.0289805	0	0.228373	0.134078	0.134078	0	0.270726	0.0264016	0.0264016	0	0.258686	0.244694	0.244694	0	0.252648	1.56444	1.56444	0	0.222274	0.143117	0.143117	0	0.256674	0.167836	0.167836	0	0.222274	0.0897832	0.0897832	0	0.210036	0.252199	0.252199	0
0.240535	0.0138219	0.0138219	0	0.260696	0.0314181	0.0314181	0	0.230404	0.146949	0.146949	0	0.272728	0.0284551	0.0284551	0	0.260696	0.292273	0.292273	0	0.254662	1.73152	1.73152	0	0.224308	0.157727	0.157727	0	0.258686	0.184311	0.184311	0	0.224308	0.100478	0.100478	0	0.212079	0.300675	0.300675	0
0.242557	0.0127162	0.0127162	0	0.262704	0.0260012	0.0260012	0	0.232433	0.174033	0.174033	0	0.274729	0.0366689	0.0366689	0	0.262704	0.334909	0.334909	0	0.256674	1.89625	1.89625	0	0.226341	0.17502	0.17502	0	0.260696	0.219663	0.219663	0	0.226341	0.111455	0.111455	0	0.214121	0.368787	0.368787	0
0.244578	0.0163099	0.0163099	0	0.264712	0.0249178	0.0249178	0	0.23446	0.20353	0.20353	0	0.276729	0.0337354	0.0337354	0	0.264712	0.389595	0.389595	0	0.258686	2.05763	2.05763	0	0.228373	0.20424	0.20424	0	0.262704	0.268058	0.268058	0	0.228373	0.119617	0.119617	0	0.216161	0.439354	0.439354	0
0.246597	0.0190742	0.0190742	0	0.266718	0.0278971	0.0278971	0	0.236487	0.242681	0.242681	0	0.278727	0.0375489	0.0375489	0	0.266718	0.464362	0.464362	0	0.260696	2.2133	2.2133	0	0.230404	0.221831	0.221831	0	0.264712	0.306499	0.306499	0	0.230404	0.125809	0.125809	0	0.2182	0.539681	0.539681	0
0.248615	0.0174156	0.0174156	0	0.268723	0.0390017	0.0390017	0	0.238511	0.275932	0.275932	0	0.280724	0.0349088	0.0349088	0	0.268723	0.54809	0.54809	0	0.262704	2.32234	2.32234	0	0.232433	0.26745	0.26745	0	0.266718	0.372741	0.372741	0	0.232433	0.15114	0.15114	0	0.220238	0.656883	0.656883	0
0.250632	0.02018	0.02018	0	0.270726	0.0311472	0.0311472	0	0.240535	0.330904	0.330904	0	0.28272	0.0349088	0.0349088	0	0.270726	0.653444	0.653444	0	0.264712	2.40991	2.40991	0	0.23446	0.321417	0.321417	0	0.268723	0.446191	0.446191	0	0.23446	0.1745	0.1745	0	0.222274	0.77838	0.77838	0
0.252648	0.0199036	0.0199036	0	0.272728	0.0349391	0.0349391	0	0.242557	0.379708	0.379708	0	0.284714	0.0419492	0.0419492	0	0.272728	0.764359	0.764359	0	0.266718	2.47869	2.47869	0	0.236487	0.390888	0.390888	0	0.270726	0.538518	0.538518	0	0.236487	0.202364	0.202364	0	0.224308	0.930559	0.930559	0
0.254662	0.0257088	0.0257088	0	0.274729	0.0419811	0.0419811	0	0.244578	0.438703	0.438703	0	0.286707	0.0463495	0.0463495	0	0.274729	0.88856	0.88856	0	0.268723	2.52733	2.52733	0	0.238511	0.477355	0.477355	0	0.272728	0.647663	0.647663	0	0.238511	0.221221	0.221221	0	0.226341	1.10268	1.10268	0
0.256674	0.0262616	0.0262616	0	0.276729	0.0395434	0.0395434	0	0.246597	0.511641	0.511641	0	0.288699	0.0437093	0.0437093	0	0.276729	1.02141	1.02141	0	0.270726	2.5488	2.5488	0	0.240535	0.561436	0.561436	0	0.274729	0.76127	0.76127	0	0.240535	0.269068	0.269068	0	0.228373	1.27879	1.27879	0
0.258686	0.0284732	0.0284732	0	0.278727	0.0468563	0.0468563	0	0.248615	0.596646	0.596646	0	0.290689	0.0460561	0.0460561	0	0.278727	1.16539	1.16539	0	0.272728	2.55753	2.55753	0	0.242557	0.662512	0.662512	0	0.276729	0.897874	0.897874	0	0.242557	0.311568	0.311568	0	0.230404	1.47945	1.47945	0
0.260696	0.029026	0.029026	0	0.280724	0.0530857	0.0530857	0	0.250632	0.675484	0.675484	0	0.292679	0.0569101	0.0569101	0	0.280724	1.31523	1.31523	0	0.274729	2.52029	2.52029	0	0.244578	0.785652	0.785652	0	0.278727	1.05095	1.05095	0	0.244578	0.382212	0.382212	0	0.232433	1.68347	1.68347	0
0.262704	0.0295789	0.0295789	0	0.28272	0.0533565	0.0533565	0	0.252648	0.756467	0.756467	0	0.294667	0.0548567	0.0548567	0	0.28272	1.47002	1.47002	0	0.276729	2.4599	2.4599	0	0.246597	0.92221	0.92221	0	0.280724	1.21844	1.21844	0	0.246597	0.471151	0.471151	0	0.23446	1.91082	1.91082	0
0.264712	0.0337255	0.0337255	0	0.284714	0.0636487	0.0636487	0	0.254662	0.850589	0.850589	0	0.296654	0.0648306	0.0648306	0	0.284714	1.62419	1.62419	0	0.278727	2.39548	2.39548	0	0.248615	1.07248	1.07248	0	0.28272	1.39795	1.39795	0	0.248615	0.569378	0.569378	0	0.236487	2.12866	2.12866	0
0.266718	0.0345548	0.0345548	0	0.286707	0.0706907	0.0706907	0	0.256674	0.931841	0.931841	0	0.298639	0.0692309	0.0692309	0	0.286707	1.78732	1.78732	0	0.280724	2.33811	2.33811	0	0.250632	1.23051	1.23051	0	0.284714	1.608	1.608	0	0.250632	0.676611	0.676611	0	0.238511	2.32778	2.32778	0
0.268723	0.0392543	0.0392543	0	0.288699	0.0706907	0.0706907	0	0.258686	1.03669	1.03669	0	0.300623	0.0739245	0.0739245	0	0.288699	1.9455	1.9455	0	0.28272	2.27235	2.27235	0	0.252648	1.40374	1.40374	0	0.286707	1.81874	1.81874	0	0.252648	0.814523	0.814523	0	0.240535	2.50542	2.50542	0
0.270726	0.0453359	0.0453359	0	0.290689	0.0880248	0.0880248	0	0.260696	1.12786	1.12786	0	0.302607	0.0730445	0.0730445	0	0.290689	2.0799	2.0799	0	0.284714	2.17069	2.17069	0	0.254662	1.58264	1.58264	0	0.288699	2.03257	2.03257	0	0.254662	0.978328	0.978328	0	0.242557	2.68399	2.68399	0
0.272728	0.0469945	0.0469945	0	0.292679	0.0961501	0.0961501	0	0.262704	1.2118	1.2118	0	0.304588	0.0847784	0.0847784	0	0.292679	2.19236	2.19236	0	0.286707	2.07776	2.07776	0	0.256674	1.77853	1.77853	0	0.290689	2.2059	2.2059	0	0.256674	1.14185	1.14185	0	0.244578	2.82359	2.82359	0
0.274729	0.0544584	0.0544584	0	0.294667	0.109692	0.109692	0	0.264712	1.29921	1.29921	0	0.306569	0.0962191	0.0962191	0	0.294667	2.26682	2.26682	0	0.288699	1.98315	1.98315	0	0.258686	1.94758	1.94758	0	0.292679	2.37133	2.37133	0	0.258686	1.31326	1.31326	0	0.246597	2.93404	2.93404	0
0.276729	0.0550112	0.0550112	0	0.296654	0.123776	0.123776	0	0.266718	1.36786	1.36786	0	0.308548	0.107953	0.107953	0	0.296654	2.3456	2.3456	0	0.290689	1.87411	1.87411	0	0.260696	2.12052	2.12052	0	0.294667	2.53128	2.53128	0	0.260696	1.49085	1.49085	0	0.248615	3.01135	3.01135	0
0.278727	0.0577756	0.0577756	0	0.298639	0.140569	0.140569	0	0.268723	1.43839	1.43839	0	0.310526	0.121447	0.121447	0	0.298639	2.37557	2.37557	0	0.292679	1.77984	1.77984	0	0.262704	2.28152	2.28152	0	0.296654	2.69362	2.69362	0	0.262704	1.69462	1.69462	0	0.250632	3.03252	3.03252	0
0.280724	0.0627515	0.0627515	0	0.300623	0.161424	0.161424	0	0.270726	1.47915	1.47915	0	0.312503	0.133181	0.133181	0	0.300623	2.40399	2.40399	0	0.294667	1.67818	1.67818	0	0.264712	2.41152	2.41152	0	0.298639	2.80105	2.80105	0	0.264712	1.89699	1.89699	0	0.252648	3.04203	3.04203	0
0.28272	0.0743619	0.0743619	0	0.302607	0.171987	0.171987	0	0.272728	1.52849	1.52849	0	0.314479	0.149316	0.149316	0	0.302607	2.42408	2.42408	0	0.296654	1.58826	1.58826	0	0.266718	2.5126	2.5126	0	0.300623	2.85905	2.85905	0	0.266718	2.06699	2.06699	0	0.254662	2.99939	2.99939	0
0.284714	0.0834844	0.0834844	0	0.304588	0.199342	0.199342	0	0.274729	1.54967	1.54967	0	0.316453	0.174837	0.174837	0	0.304588	2.3938	2.3938	0	0.298639	1.51512	1.51512	0	0.268723	2.58058	2.58058	0	0.302607	2.89338	2.89338	0	0.268723	2.23755	2.23755	0	0.256674	2.91471	2.91471	0
0.286707	0.0832079	0.0832079	0	0.306569	0.226427	0.226427	0	0.276729	1.56952	1.56952	0	0.318427	0.199185	0.199185	0	0.306569	2.34344	2.34344	0	0.300623	1.41917	1.41917	0	0.270726	2.63961	2.63961	0	0.304588	2.90127	2.90127	0	0.270726	2.396	2.396	0	0.258686	2.81868	2.81868	0
0.288699	0.0917775	0.0917775	0	0.308548	0.265429	0.265429	0	0.278727	1.59258	1.59258	0	0.320399	0.240841	0.240841	0	0.308548	2.28783	2.28783	0	0.302607	1.34503	1.34503	0	0.272728	2.67003	2.67003	0	0.306569	2.86111	2.86111	0	0.272728	2.53363	2.53363	0	0.260696	2.73216	2.73216	0
0.290689	0.100071	0.100071	0	0.310526	0.29793	0.29793	0	0.280724	1.58909	1.58909	0	0.32237	0.278097	0.278097	0	0.310526	2.22851	2.22851	0	0.304588	1.26115	1.26115	0	0.274729	2.6575	2.6575	0	0.308548	2.78183	2.78183	0	0.274729	2.64875	2.64875	0	0.262704	2.61557	2.61557	0
0.292679	0.113893	0.113893	0	0.312503	0.335848	0.335848	0	0.28272	1.56067	1.56067	0	0.324339	0.330313	0.330313	0	0.312503	2.15961	2.15961	0	0.306569	1.187	1.187	0	0.276729	2.61158	2.61158	0	0.310526	2.7046	2.7046	0	0.276729	2.7329	2.7329	0	0.264712	2.49376	2.49376	0
0.294667	0.123292	0.123292	0	0.314479	0.378642	0.378642	0	0.284714	1.53224	1.53224	0	0.326308	0.379303	0.379303	0	0.314479	2.06754	2.06754	0	0.308548	1.10648	1.10648	0	0.278727	2.55285	2.55285	0	0.312503	2.61777	2.61777	0	0.278727	2.78666	2.78666	0	0.266718	2.36398	2.36398	0
0.296654	0.137666	0.137666	0	0.316453	0.439582	0.439582	0	0.286707	1.48692	1.48692	0	0.328275	0.4456	0.4456	0	0.316453	1.97207	1.97207	0	0.310526	1.04106	1.04106	0	0.280724	2.49829	2.49829	0	0.314479	2.52269	2.52269	0	0.280724	2.80467	2.80467	0	0.268723	2.22224	2.22224	0
0.298639	0.142919	0.142919	0	0.318427	0.49321	0.49321	0	0.288699	1.44643	1.44643	0	0.330241	0.522458	0.522458	0	0.318427	1.88773	1.88773	0	0.312503	0.971612	0.971612	0	0.28272	2.42494	2.42494	0	0.316453	2.41424	2.41424	0	0.28272	2.8058	2.8058	0	0.270726	2.08632	2.08632	0
0.300623	0.148724	0.148724	0	0.320399	0.551983	0.551983	0	0.290689	1.41345	1.41345	0	0.332206	0.60225	0.60225	0	0.320399	1.81203	1.81203	0	0.314479	0.911893	0.911893	0	0.284714	2.35219	2.35219	0	0.318427	2.28313	2.28313	0	0.284714	2.77625	2.77625	0	0.272728	1.9596	1.9596	0
0.302607	0.168074	0.168074	0	0.32237	0.611298	0.611298	0	0.292679	1.37135	1.37135	0	0.33417	0.697589	0.697589	0	0.32237	1.72058	1.72058	0	0.316453	0.852845	0.852845	0	0.286707	2.2693	2.2693	0	0.320399	2.15545	2.15545	0	0.286707	2.72643	2.72643	0	0.274729	1.8197	1.8197	0
0.304588	0.192401	0.192401	0	0.324339	0.673051	0.673051	0	0.294667	1.3212	1.3212	0	0.336133	0.799382	0.799382	0	0.324339	1.64736	1.64736	0	0.318427	0.799835	0.799835	0	0.288699	2.17806	2.17806	0	0.32237	2.03566	2.03566	0	0.288699	2.651	2.651	0	0.276729	1.69575	1.69575	0
0.306569	0.200694	0.200694	0	0.326308	0.743471	0.743471	0	0.296654	1.25926	1.25926	0	0.338094	0.917016	0.917016	0	0.326308	1.55931	1.55931	0	0.320399	0.74951	0.74951	0	0.290689	2.06506	2.06506	0	0.324339	1.90798	1.90798	0	0.290689	2.55812	2.55812	0	0.278727	1.56535	1.56535	0
0.308548	0.218939	0.218939	0	0.328275	0.814974	0.814974	0	0.298639	1.20187	1.20187	0	0.340054	1.03758	1.03758	0	0.328275	1.47218	1.47218	0	0.32237	0.700192	0.700192	0	0.292679	1.96875	1.96875	0	0.326308	1.7906	1.7906	0	0.292679	2.46524	2.46524	0	0.280724	1.44876	1.44876	0
0.310526	0.241331	0.241331	0	0.330241	0.896769	0.896769	0	0.300623	1.15736	1.15736	0	0.342014	1.14642	1.14642	0	0.330241	1.37548	1.37548	0	0.324339	0.67268	0.67268	0	0.294667	1.86112	1.86112	0	0.328275	1.67184	1.67184	0	0.294667	2.36617	2.36617	0	0.28272	1.33678	1.33678	0
0.312503	0.253218	0.253218	0	0.332206	0.971794	0.971794	0	0.302607	1.11338	1.11338	0	0.343971	1.27754	1.27754	0	0.332206	1.29576	1.29576	0	0.326308	0.635775	0.635775	0	0.296654	1.76898	1.76898	0	0.330241	1.55034	1.55034	0	0.296654	2.26006	2.26006	0	0.284714	1.24075	1.24075	0
0.314479	0.273121	0.273121	0	0.33417	1.03463	1.03463	0	0.304588	1.05895	1.05895	0	0.345928	1.4119	1.4119	0	0.33417	1.22378	1.22378	0	0.328275	0.599541	0.599541	0	0.298639	1.65717	1.65717	0	0.332206	1.44875	1.44875	0	0.298639	2.1441	2.1441	0	0.286707	1.14349	1.14349	0
0.316453	0.289984	0.289984	0	0.336133	1.09476	1.09476	0	0.306569	1.00666	1.00666	0	0.347884	1.54655	1.54655	0	0.336133	1.14499	1.14499	0	0.330241	0.577063	0.577063	0	0.300623	1.55848	1.55848	0	0.33417	1.3475	1.3475	0	0.300623	2.00732	2.00732	0	0.288699	1.04868	1.04868	0
0.318427	0.317904	0.317904	0	0.338094	1.15272	1.15272	0	0.308548	0.944176	0.944176	0	0.349838	1.66447	1.66447	0	0.338094	1.07146	1.07146	0	0.332206	0.544519	0.544519	0	0.302607	1.45979	1.45979	0	0.336133	1.25105	1.25105	0	0.302607	1.8832	1.8832	0	0.290689	0.982103	0.982103	0
0.320399	0.341125	0.341125	0	0.340054	1.20282	1.20282	0	0.310526	0.889741	0.889741	0	0.351792	1.76715	1.76715	0	0.340054	0.995768	0.995768	0	0.33417	0.530428	0.530428	0	0.304588	1.36706	1.36706	0	0.338094	1.16765	1.16765	0	0.304588	1.76527	1.76527	0	0.292679	0.903559	0.903559	0
0.32237	0.355223	0.355223	0	0.342014	1.25347	1.25347	0	0.312503	0.845227	0.845227	0	0.353744	1.85427	1.85427	0	0.342014	0.921001	0.921001	0	0.336133	0.51164	0.51164	0	0.306569	1.29402	1.29402	0	0.340054	1.07978	1.07978	0	0.306569	1.66451	1.66451	0	0.294667	0.839436	0.839436	0
0.324339	0.382314	0.382314	0	0.343971	1.30168	1.30168	0	0.314479	0.803931	0.803931	0	0.355695	1.92233	1.92233	0	0.343971	0.872185	0.872185	0	0.338094	0.484464	0.484464	0	0.308548	1.20487	1.20487	0	0.342014	1.00393	1.00393	0	0.308548	1.55052	1.55052	0	0.296654	0.774699	0.774699	0
0.326308	0.403876	0.403876	0	0.345928	1.33175	1.33175	0	0.316453	0.759149	0.759149	0	0.357645	1.981	1.981	0	0.345928	0.82337	0.82337	0	0.340054	0.463663	0.463663	0	0.310526	1.12824	1.12824	0	0.343971	0.922929	0.922929	0	0.310526	1.45286	1.45286	0	0.298639	0.707507	0.707507	0
0.328275	0.425715	0.425715	0	0.347884	1.36614	1.36614	0	0.318427	0.710613	0.710613	0	0.359594	2.0121	2.0121	0	0.347884	0.771157	0.771157	0	0.342014	0.450914	0.450914	0	0.312503	1.05728	1.05728	0	0.345928	0.860805	0.860805	0	0.312503	1.34703	1.34703	0	0.300623	0.67161	0.67161	0
0.330241	0.447554	0.447554	0	0.349838	1.37833	1.37833	0	0.320399	0.673071	0.673071	0	0.361542	2.04407	2.04407	0	0.349838	0.726976	0.726976	0	0.343971	0.436823	0.436823	0	0.314479	0.984227	0.984227	0	0.347884	0.807606	0.807606	0	0.314479	1.25331	1.25331	0	0.302607	0.618532	0.618532	0
0.332206	0.469945	0.469945	0	0.351792	1.37671	1.37671	0	0.32237	0.634993	0.634993	0	0.363488	2.04436	2.04436	0	0.351792	0.670746	0.670746	0	0.345928	0.415015	0.415015	0	0.316453	0.921613	0.921613	0	0.349838	0.744109	0.744109	0	0.316453	1.17394	1.17394	0	0.304588	0.582021	0.582021	0
0.33417	0.486532	0.486532	0	0.353744	1.35125	1.35125	0	0.324339	0.606836	0.606836	0	0.365434	2.03674	2.03674	0	0.353744	0.642939	0.642939	0	0.347884	0.401931	0.401931	0	0.318427	0.872417	0.872417	0	0.351792	0.68988	0.68988	0	0.318427	1.10301	1.10301	0	0.306569	0.543363	0.543363	0
0.336133	0.504224	0.504224	0	0.355695	1.34556	1.34556	0	0.326308	0.574658	0.574658	0	0.367378	1.98863	1.98863	0	0.355695	0.616678	0.616678	0	0.349838	0.378781	0.378781	0	0.320399	0.822326	0.822326	0	0.353744	0.645947	0.645947	0	0.320399	1.01661	1.01661	0	0.308548	0.505011	0.505011	0
0.338094	0.525786	0.525786	0	0.357645	1.32118	1.32118	0	0.328275	0.541406	0.541406	0	0.369322	1.95724	1.95724	0	0.357645	0.583002	0.583002	0	0.351792	0.3714	0.3714	0	0.32237	0.771042	0.771042	0	0.355695	0.592748	0.592748	0	0.32237	0.94962	0.94962	0	0.310526	0.482307	0.482307	0
0.340054	0.552877	0.552877	0	0.359594	1.2857	1.2857	0	0.330241	0.519954	0.519954	0	0.371264	1.90766	1.90766	0	0.359594	0.554578	0.554578	0	0.353744	0.351941	0.351941	0	0.324339	0.725126	0.725126	0	0.357645	0.552247	0.552247	0	0.324339	0.892767	0.892767	0	0.312503	0.458683	0.458683	0
0.342014	0.565593	0.565593	0	0.361542	1.25429	1.25429	0	0.332206	0.500915	0.500915	0	0.373205	1.85545	1.85545	0	0.361542	0.537276	0.537276	0	0.355695	0.341205	0.341205	0	0.326308	0.690837	0.690837	0	0.359594	0.50042	0.50042	0	0.326308	0.840135	0.840135	0	0.314479	0.434138	0.434138	0
0.343971	0.585496	0.585496	0	0.363488	1.21718	1.21718	0	0.33417	0.477317	0.477317	0	0.375145	1.78915	1.78915	0	0.363488	0.519048	0.519048	0	0.357645	0.320739	0.320739	0	0.328275	0.649989	0.649989	0	0.361542	0.481886	0.481886	0	0.328275	0.796791	0.796791	0	0.316453	0.400389	0.400389	0
0.345928	0.600977	0.600977	0	0.365434	1.18116	1.18116	0	0.336133	0.457474	0.457474	0	0.377084	1.73458	1.73458	0	0.365434	0.49464	0.49464	0	0.359594	0.299938	0.299938	0	0.330241	0.607949	0.607949	0	0.363488	0.466098	0.466098	0	0.330241	0.741345	0.741345	0	0.318427	0.392718	0.392718	0
0.347884	0.615352	0.615352	0	0.367378	1.1427	1.1427	0	0.338094	0.44782	0.44782	0	0.379022	1.65861	1.65861	0	0.367378	0.477956	0.477956	0	0.361542	0.279137	0.272123	0.00701384	0.332206	0.567399	0.567399	0	0.365434	0.436581	0.436581	0	0.332206	0.686181	0.686181	0	0.320399	0.347004	0.347004	0
0.349838	0.625303	0.625303	0	0.369322	1.09963	1.09963	0	0.340054	0.43334	0.43334	0	0.380959	1.58938	1.58938	0	0.369322	0.464671	0.464671	0	0.363488	0.263704	0.255279	0.00842515	0.33417	0.528638	0.528638	0	0.367378	0.401229	0.401229	0	0.33417	0.640867	0.640867	0	0.32237	0.326754	0.326754	0
0.351792	0.638849	0.638849	0	0.371264	1.06253	1.06253	0	0.342014	0.409206	0.409206	0	0.382895	1.51457	1.51457	0	0.371264	0.454785	0.454785	0	0.365434	0.248607	0.239477	0.00912985	0.336133	0.50568	0.50568	0	0.369322	0.377546	0.377546	0	0.336133	0.602871	0.602871	0	0.324339	0.307118	0.307118	0
0.353744	0.639125	0.639125	0	0.373205	1.01377	1.01377	0	0.343971	0.400356	0.400356	0	0.384829	1.44211	1.44211	0	0.373205	0.433158	0.433158	0	0.367378	0.23787	0.224652	0.0132185	0.338094	0.493157	0.493157	0	0.371264	0.343224	0.343224	0	0.338094	0.570222	0.570222	0	0.326308	0.299141	0.299141	0
0.355695	0.649077	0.649077	0	0.375145	0.962314	0.962314	0	0.345928	0.399552	0.399552	0	0.386763	1.3591	1.3591	0	0.375145	0.421417	0.421417	0	0.369322	0.222773	0.210747	0.0120264	0.340054	0.466919	0.466919	0	0.373205	0.319885	0.319885	0	0.340054	0.533915	0.533915	0	0.328275	0.280732	0.280732	0
0.357645	0.641061	0.641061	0	0.377084	0.923312	0.923312	0	0.347884	0.392044	0.392044	0	0.388696	1.28341	1.28341	0	0.377084	0.406278	0.406278	0	0.371264	0.210024	0.197703	0.0123211	0.342014	0.437699	0.437699	0	0.375145	0.30238	0.30238	0	0.342014	0.489164	0.489164	0	0.330241	0.257721	0.257721	0
0.359594	0.645484	0.645484	0	0.379022	0.881331	0.881331	0	0.349838	0.390971	0.390971	0	0.390627	1.20597	1.20597	0	0.379022	0.399172	0.399172	0	0.373205	0.195262	0.185469	0.00979277	0.343971	0.423686	0.423686	0	0.377084	0.286249	0.286249	0	0.343971	0.462145	0.462145	0	0.332206	0.233177	0.233177	0
0.361542	0.637467	0.637467	0	0.380959	0.84585	0.84585	0	0.351792	0.373005	0.373005	0	0.392558	1.13967	1.13967	0	0.380959	0.392066	0.392066	0	0.375145	0.1909	0.173994	0.0169059	0.345928	0.39864	0.39864	0	0.379022	0.266342	0.266342	0	0.345928	0.43597	0.43597	0	0.33417	0.206484	0.206484	0
0.363488	0.633873	0.633873	0	0.382895	0.820932	0.820932	0	0.353744	0.36791	0.36791	0	0.394487	1.07777	1.07777	0	0.382895	0.367968	0.367968	0	0.377084	0.191571	0.163233	0.0283388	0.347884	0.389397	0.389397	0	0.380959	0.249524	0.249524	0	0.347884	0.413735	0.413735	0	0.336133	0.193905	0.193905	0
0.365434	0.613417	0.613417	0	0.384829	0.780847	0.780847	0	0.355695	0.348602	0.348602	0	0.396416	1.0103	1.0103	0	0.384829	0.353138	0.353138	0	0.379022	0.196268	0.153139	0.0431291	0.349838	0.371806	0.371806	0	0.382895	0.23099	0.23099	0	0.349838	0.388686	0.388686	0	0.338094	0.180405	0.180405	0
0.367378	0.608441	0.608441	0	0.386763	0.739679	0.739679	0	0.357645	0.348602	0.348602	0	0.398343	0.953978	0.953978	0	0.386763	0.337999	0.337999	0	0.380959	0.192242	0.143673	0.0485692	0.351792	0.353022	0.353022	0	0.384829	0.215201	0.215201	0	0.351792	0.36054	0.36054	0	0.340054	0.167212	0.167212	0
0.369322	0.601806	0.601806	0	0.388696	0.703386	0.703386	0	0.359594	0.342971	0.342971	0	0.400269	0.898241	0.898241	0	0.388696	0.315445	0.315445	0	0.382895	0.191236	0.134795	0.0564409	0.353744	0.335132	0.335132	0	0.386763	0.195294	0.195294	0	0.353744	0.338869	0.338869	0	0.342014	0.16353	0.16353	0
0.371264	0.593237	0.593237	0	0.390627	0.673051	0.673051	0	0.361542	0.339217	0.3366	0.00261734	0.402195	0.844558	0.844558	0	0.390627	0.309266	0.309266	0	0.384829	0.181171	0.126468	0.0547024	0.355695	0.304422	0.304422	0	0.388696	0.177447	0.177447	0	0.355695	0.307346	0.307346	0	0.343971	0.154326	0.154326	0
0.373205	0.581903	0.581903	0	0.392558	0.649758	0.649758	0	0.363488	0.334122	0.319725	0.0143971	0.404119	0.797622	0.797622	0	0.392558	0.278679	0.278679	0	0.386763	0.194926	0.118659	0.0762671	0.357645	0.288917	0.288917	0	0.390627	0.16818	0.16818	0	0.357645	0.284267	0.284267	0	0.345928	0.14144	0.14144	0
0.375145	0.565316	0.565316	0	0.394487	0.612923	0.612923	0	0.365434	0.322591	0.303672	0.0189193	0.406042	0.745699	0.745699	0	0.394487	0.261069	0.261069	0	0.388696	0.188887	0.111335	0.0775521	0.359594	0.267748	0.267748	0	0.392558	0.153421	0.153421	0	0.359594	0.270476	0.270476	0	0.347884	0.129168	0.129168	0
0.377084	0.555641	0.555641	0	0.396416	0.58638	0.58638	0	0.367378	0.310256	0.288404	0.0218524	0.407964	0.71519	0.71519	0	0.396416	0.256434	0.256434	0	0.390627	0.194255	0.104466	0.0897893	0.361542	0.257611	0.257611	0	0.394487	0.141751	0.141751	0	0.361542	0.244019	0.244019	0	0.349838	0.122418	0.122418	0
0.379022	0.543478	0.543478	0	0.398343	0.555504	0.555504	0	0.369322	0.297653	0.273887	0.0237657	0.409886	0.669134	0.669134	0	0.398343	0.245621	0.245621	0	0.392558	0.201636	0.0980234	0.103613	0.363488	0.236143	0.236143	0	0.396416	0.131455	0.131455	0	0.363488	0.227695	0.227695	0	0.351792	0.120884	0.120884	0
0.380959	0.527721	0.527721	0	0.400269	0.534378	0.534378	0	0.371264	0.291485	0.260087	0.0313982	0.411806	0.621024	0.621024	0	0.400269	0.227392	0.227392	0	0.394487	0.198617	0.0919805	0.106636	0.365434	0.2269	0.2269	0	0.398343	0.125963	0.125963	0	0.365434	0.21503	0.21503	0	0.353744	0.107384	0.107384	0
0.382895	0.510305	0.510305	0	0.402195	0.513794	0.513794	0	0.373205	0.293094	0.246972	0.0461222	0.413725	0.596676	0.596676	0	0.402195	0.222449	0.222449	0	0.396416	0.200294	0.0863128	0.113982	0.367378	0.203643	0.203643	0	0.400269	0.115323	0.114748	0.000575168	0.367378	0.198142	0.198142	0	0.355695	0.104316	0.104316	0
0.384829	0.491784	0.491784	0	0.404119	0.487251	0.487251	0	0.375145	0.288267	0.234509	0.0537584	0.415643	0.567048	0.567048	0	0.404119	0.218742	0.218742	0	0.398343	0.204656	0.0809966	0.123659	0.369322	0.197382	0.197382	0	0.402195	0.105026	0.106045	-0.00101807	0.369322	0.18407	0.18407	0	0.357645	0.0917366	0.0917366	0
0.386763	0.471604	0.471604	0	0.406042	0.464771	0.464771	0	0.377084	0.275664	0.222668	0.0529958	0.417561	0.541819	0.541819	0	0.406042	0.223685	0.223685	0	0.400269	0.218411	0.0760104	0.142401	0.371264	0.189034	0.187081	0.00195233	0.404119	0.0988485	0.0980043	0.000844211	0.371264	0.167183	0.167183	0	0.359594	0.0932707	0.0932707	0
0.388696	0.463587	0.463587	0	0.407964	0.441207	0.441207	0	0.379022	0.268156	0.21142	0.0567355	0.419477	0.520698	0.520698	0	0.407964	0.212871	0.212871	0	0.402195	0.219753	0.0713332	0.14842	0.373205	0.179791	0.17516	0.00463101	0.406042	0.107429	0.0905768	0.0168522	0.373205	0.159865	0.159865	0	0.361542	0.0951115	0.0780615	0.01705
0.390627	0.451977	0.451977	0	0.409886	0.427936	0.427936	0	0.380959	0.278882	0.200737	0.0781454	0.421392	0.49811	0.48688	0.0112306	0.409886	0.206692	0.206692	0	0.404119	0.226799	0.0669457	0.159853	0.375145	0.170548	0.164	0.0065475	0.407964	0.100221	0.0837154	0.0165059	0.375145	0.147481	0.147481	0	0.363488	0.074862	0.0722153	0.00264667
0.392558	0.425715	0.425715	0	0.411806	0.418456	0.407158	0.0112979	0.382895	0.264133	0.19059	0.0735437	0.423306	0.483149	0.454875	0.0282742	0.411806	0.207619	0.182901	0.0247181	0.406042	0.239548	0.0628301	0.176718	0.377084	0.166672	0.153555	0.0131166	0.409886	0.100908	0.0773766	0.0235311	0.377084	0.140445	0.140445	0	0.365434	0.0724075	0.06681	0.0055975
0.394487	0.405811	0.405811	0	0.413725	0.391101	0.384958	0.00614265	0.384829	0.260916	0.180954	0.0799616	0.42522	0.466428	0.424887	0.0415415	0.413725	0.199277	0.172694	0.0265828	0.407964	0.238542	0.0589694	0.179572	0.379022	0.158025	0.143778	0.0142467	0.411806	0.0937001	0.0715201	0.02218	0.379022	0.128624	0.128624	0	0.367378	0.0724075	0.0618115	0.010596
0.396416	0.386737	0.386737	0	0.415643	0.385955	0.363881	0.022074	0.386763	0.254212	0.171804	0.0824073	0.427132	0.457921	0.396804	0.0611166	0.415643	0.211636	0.163059	0.0485764	0.409886	0.243239	0.0553477	0.187891	0.380959	0.154745	0.134627	0.0201178	0.413725	0.0823736	0.0661095	0.0162641	0.380959	0.126372	0.121605	0.00476687	0.369322	0.0837595	0.0571896	0.0265699
0.398343	0.375403	0.375403	0	0.417561	0.378913	0.343886	0.0350264	0.388696	0.249385	0.163117	0.0862682	0.429044	0.44032	0.370523	0.0697966	0.417561	0.215034	0.153964	0.0610699	0.411806	0.248607	0.0519499	0.196657	0.382895	0.147291	0.126062	0.0212295	0.415643	0.0906111	0.0611104	0.0295007	0.382895	0.125809	0.11277	0.0130393	0.371264	0.0852936	0.0529153	0.0323782
0.400269	0.356882	0.357431	-0.000549277	0.419477	0.374579	0.32493	0.0496492	0.390627	0.249385	0.154868	0.0945164	0.430954	0.431519	0.34594	0.0855794	0.419477	0.214107	0.145378	0.0687287	0.413725	0.251962	0.0487623	0.203199	0.384829	0.143415	0.118044	0.0253707	0.417561	0.0854628	0.0564916	0.0289711	0.384829	0.119336	0.10458	0.0147557	0.373205	0.0822255	0.0489628	0.0332627
0.402195	0.349418	0.342117	0.00730084	0.421392	0.359954	0.30697	0.0529831	0.392558	0.24724	0.147037	0.100202	0.432863	0.419199	0.322954	0.0962443	0.421392	0.2104	0.137274	0.0731253	0.415643	0.257665	0.0457717	0.211893	0.386763	0.147291	0.11054	0.0367511	0.419477	0.0864924	0.0522238	0.0342686	0.386763	0.113144	0.0969884	0.0161555	0.375145	0.076396	0.0453072	0.0310888
0.404119	0.341401	0.327221	0.0141802	0.423306	0.348849	0.289962	0.0588868	0.394487	0.24724	0.139603	0.107637	0.434772	0.406291	0.301469	0.104822	0.423306	0.227392	0.129624	0.0977681	0.417561	0.26404	0.0429659	0.221074	0.388696	0.1458	0.103516	0.0422847	0.421392	0.0912975	0.0482804	0.0430171	0.388696	0.11624	0.0899507	0.0262891	0.377084	0.0770096	0.0419263	0.0350833
0.406042	0.332279	0.312766	0.0195126	0.42522	0.348307	0.273863	0.0744442	0.396416	0.250457	0.132545	0.117912	0.436679	0.38869	0.281394	0.107297	0.42522	0.230173	0.122403	0.10777	0.419477	0.260349	0.0403333	0.220016	0.390627	0.143415	0.0969406	0.0464745	0.423306	0.0875221	0.0446364	0.0428857	0.390627	0.115677	0.0834267	0.0322501	0.379022	0.0702598	0.0387994	0.0314605
0.407964	0.324262	0.298771	0.0254916	0.427132	0.337473	0.25863	0.0788435	0.398343	0.255552	0.125846	0.129707	0.438586	0.38253	0.262639	0.11989	0.427132	0.235734	0.115586	0.120148	0.421392	0.271421	0.0378633	0.233557	0.392558	0.149378	0.0907857	0.0585926	0.42522	0.0851196	0.0412691	0.0438505	0.392558	0.111455	0.0773786	0.0340765	0.380959	0.0656576	0.0359072	0.0297503
0.409886	0.309058	0.285245	0.0238128	0.429044	0.331515	0.244222	0.0872927	0.400269	0.259575	0.119486	0.140089	0.440491	0.371089	0.245124	0.125965	0.429044	0.239751	0.109151	0.130599	0.423306	0.279808	0.0355457	0.244263	0.394487	0.149378	0.085024	0.0643543	0.427132	0.0816872	0.0381571	0.0435301	0.394487	0.0979454	0.0717714	0.026174	0.382895	0.0671917	0.0332319	0.0339598
0.411806	0.300765	0.272197	0.0285683	0.430954	0.32664	0.230599	0.0960403	0.402195	0.257698	0.113449	0.144248	0.442396	0.360822	0.228768	0.132054	0.430954	0.246857	0.103077	0.143779	0.42522	0.270079	0.0333709	0.236708	0.396416	0.15236	0.0796307	0.0727292	0.429044	0.0823736	0.0352812	0.0470924	0.396416	0.0982269	0.0665732	0.0316537	0.384829	0.0724075	0.0307573	0.0416502
0.413725	0.290537	0.259629	0.0309076	0.432863	0.317973	0.217722	0.10025	0.404119	0.264133	0.107719	0.156414	0.4443	0.354368	0.213499	0.140869	0.432863	0.253345	0.0973434	0.156001	0.427132	0.271085	0.0313301	0.239755	0.398343	0.153553	0.0745817	0.0789708	0.430954	0.0748228	0.0326234	0.0421993	0.398343	0.0934421	0.0617536	0.0316885	0.386763	0.079771	0.0284682	0.0513028
0.415643	0.281691	0.247541	0.0341498	0.434772	0.310931	0.205552	0.105378	0.406042	0.268156	0.10228	0.165876	0.446203	0.349088	0.199244	0.149844	0.434772	0.264776	0.0919306	0.172845	0.429044	0.256994	0.0294151	0.227579	0.400269	0.158919	0.0698552	0.0890641	0.432863	0.0658989	0.030167	0.0357319	0.400269	0.0886575	0.0572853	0.0313722	0.388696	0.0745551	0.0263505	0.0482046
0.417561	0.272292	0.23593	0.0363618	0.436679	0.31066	0.194054	0.116606	0.407964	0.2762	0.0971166	0.179084	0.448105	0.33442	0.185939	0.148481	0.436679	0.267866	0.0868209	0.181045	0.430954	0.252968	0.0276181	0.22535	0.402195	0.150273	0.0654303	0.0848424	0.434772	0.0590344	0.0278966	0.0311378	0.402195	0.0911906	0.0531422	0.0380483	0.390627	0.079771	0.0243914	0.0553796
0.419477	0.255429	0.224789	0.03064	0.438586	0.310389	0.183192	0.127197	0.409886	0.284513	0.0922158	0.192297	0.450006	0.32298	0.173522	0.149458	0.438586	0.26354	0.0819972	0.181543	0.432863	0.253975	0.0259316	0.228043	0.404119	0.153553	0.0612876	0.0922649	0.436679	0.0604074	0.0257981	0.0346093	0.404119	0.0878131	0.0493006	0.0385125	0.392558	0.0791573	0.0225788	0.0565785
0.421392	0.252112	0.214111	0.0380003	0.440491	0.298201	0.172932	0.125269	0.411806	0.287195	0.0875637	0.199631	0.451906	0.311246	0.161933	0.149313	0.440491	0.265703	0.0774434	0.18826	0.434772	0.261691	0.0243489	0.237342	0.406042	0.150869	0.0574091	0.09346	0.438586	0.0645261	0.0238583	0.0406678	0.406042	0.0847172	0.0457384	0.0389788	0.394487	0.0702598	0.0209018	0.0493581
0.423306	0.248795	0.203886	0.0449081	0.442396	0.287367	0.163242	0.124125	0.413725	0.291753	0.083148	0.208605	0.453805	0.292764	0.151119	0.141646	0.442396	0.276516	0.0731441	0.203372	0.436679	0.251291	0.0228635	0.228427	0.407964	0.148782	0.0537778	0.0950041	0.440491	0.0621235	0.0220653	0.0400583	0.407964	0.0883761	0.0424354	0.0459407	0.396416	0.0687258	0.0193501	0.0493757
0.42522	0.249624	0.194103	0.0555204	0.4443	0.281679	0.154093	0.127586	0.415643	0.288536	0.0789564	0.209579	0.455703	0.280737	0.141028	0.139709	0.4443	0.269719	0.0690855	0.200634	0.438586	0.247936	0.0214693	0.226466	0.409886	0.164883	0.0503779	0.114505	0.442396	0.0634964	0.0204077	0.0430887	0.409886	0.0872502	0.0393723	0.0478779	0.398343	0.0711803	0.0179144	0.0532659
0.427132	0.23829	0.18475	0.0535398	0.446203	0.275179	0.145455	0.129724	0.417561	0.288536	0.0749778	0.213558	0.457601	0.277803	0.131612	0.146192	0.446203	0.272809	0.0652535	0.207556	0.440491	0.24391	0.0201608	0.223749	0.411806	0.158025	0.0471943	0.110831	0.4443	0.0624667	0.0188754	0.0435913	0.411806	0.0824655	0.0365316	0.0459338	0.400269	0.0767029	0.0165859	0.060117
0.429044	0.232208	0.175814	0.0563942	0.448105	0.26597	0.137299	0.128671	0.419477	0.301943	0.0712009	0.230742	0.459497	0.27399	0.122826	0.151164	0.448105	0.279297	0.0616358	0.217661	0.442396	0.241897	0.0189326	0.222964	0.413725	0.154745	0.0442135	0.110532	0.446203	0.0672719	0.0174588	0.0498131	0.413725	0.0810583	0.0338973	0.047161	0.402195	0.0671917	0.0153566	0.0518352
0.430954	0.232761	0.167282	0.0654794	0.450006	0.261908	0.1296	0.132307	0.421392	0.305161	0.067616	0.237545	0.461393	0.252282	0.114629	0.137653	0.450006	0.280842	0.05822	0.222622	0.4443	0.244245	0.0177798	0.226465	0.415643	0.152658	0.0414222	0.111236	0.448105	0.0573184	0.0161491	0.0411692	0.415643	0.0700816	0.031454	0.0386276	0.404119	0.0582942	0.0142189	0.0440753
0.432863	0.227509	0.15914	0.0683691	0.451906	0.255678	0.122332	0.133346	0.423306	0.308647	0.0642128	0.244434	0.463287	0.248175	0.106981	0.141194	0.451906	0.293818	0.054995	0.238823	0.446203	0.232167	0.0166977	0.215469	0.417561	0.147888	0.0388085	0.109079	0.450006	0.0569751	0.0149383	0.0420369	0.417561	0.0681114	0.0291881	0.0389233	0.406042	0.0484762	0.013166	0.0353102
0.434772	0.230826	0.151373	0.0794529	0.453805	0.260012	0.115473	0.144539	0.42522	0.310256	0.0609823	0.249274	0.465181	0.242308	0.0998444	0.142464	0.453805	0.291964	0.0519499	0.240014	0.448105	0.228812	0.0156819	0.21313	0.419477	0.159516	0.0363608	0.123155	0.451906	0.0576616	0.0138187	0.0438429	0.419477	0.074022	0.0270863	0.0469357	0.407964	0.0497035	0.0121917	0.0375118
0.436679	0.227232	0.143969	0.0832636	0.455703	0.250261	0.108998	0.141263	0.427132	0.317764	0.0579155	0.259849	0.467074	0.238201	0.0931861	0.145015	0.455703	0.295363	0.0490748	0.246288	0.450006	0.224115	0.0147284	0.209387	0.421392	0.153254	0.0340687	0.119186	0.453805	0.0573184	0.0127835	0.0445348	0.421392	0.0706446	0.0251369	0.0455076	0.409886	0.0457149	0.0112899	0.034425
0.438586	0.231102	0.136912	0.0941907	0.457601	0.249719	0.102887	0.146833	0.429044	0.312938	0.0550042	0.257933	0.468966	0.235854	0.0869739	0.14888	0.457601	0.296599	0.0463599	0.250239	0.451906	0.224115	0.0138333	0.210282	0.423306	0.152956	0.0319221	0.121034	0.455703	0.059721	0.0118264	0.0478946	0.423306	0.0683929	0.0233287	0.0450642	0.411806	0.0503171	0.0104551	0.0398619
0.440491	0.228338	0.130189	0.0981492	0.459497	0.24674	0.0971196	0.149621	0.430954	0.319642	0.0522405	0.267401	0.470857	0.21972	0.0811777	0.138542	0.459497	0.294127	0.0437965	0.250331	0.453805	0.219082	0.0129929	0.20609	0.42522	0.153254	0.0299117	0.123343	0.457601	0.0590344	0.0109412	0.0480932	0.42522	0.0717703	0.0216513	0.0501189	0.413725	0.0408059	0.00968256	0.0311233
0.442396	0.225021	0.123786	0.101235	0.461393	0.244573	0.0916762	0.152897	0.432863	0.312401	0.0496168	0.262785	0.472747	0.224707	0.0757695	0.148937	0.461393	0.2932	0.0413757	0.251824	0.455703	0.217069	0.012204	0.204865	0.427132	0.158919	0.0280288	0.130891	0.459497	0.0518268	0.0101228	0.041704	0.427132	0.0681114	0.0200953	0.0480161	0.415643	0.0414195	0.00896739	0.0324521
0.4443	0.219768	0.117689	0.102079	0.463287	0.248636	0.0865393	0.162097	0.434772	0.318569	0.047126	0.271443	0.474637	0.225294	0.0707234	0.15457	0.463287	0.285476	0.0390899	0.246386	0.457601	0.20734	0.0114633	0.195877	0.429044	0.15236	0.0262653	0.126095	0.461393	0.0531997	0.00936584	0.0438339	0.429044	0.0655784	0.0186518	0.0469266	0.417561	0.0404991	0.00830541	0.0321937
0.446203	0.220045	0.111886	0.108159	0.465181	0.243761	0.0816911	0.16207	0.436679	0.31991	0.0447613	0.275148	0.476525	0.231454	0.066015	0.165439	0.465181	0.275899	0.0369312	0.238967	0.459497	0.197275	0.0107679	0.186507	0.430954	0.150273	0.0246136	0.125659	0.463287	0.0425598	0.00866585	0.0338939	0.430954	0.0644525	0.0173127	0.0471398	0.419477	0.0441808	0.00769257	0.0364883
0.448105	0.217004	0.106363	0.110641	0.467074	0.241594	0.0771157	0.164478	0.438586	0.318301	0.0425162	0.275785	0.478413	0.241428	0.0616219	0.179806	0.467074	0.277443	0.0348926	0.242551	0.461393	0.19392	0.0101149	0.183805	0.432863	0.147291	0.0230665	0.124225	0.465181	0.0525132	0.00801845	0.0444948	0.432863	0.0619195	0.0160703	0.0458492	0.421392	0.0429536	0.00712527	0.0358283
0.450006	0.22585	0.101108	0.124742	0.468966	0.234552	0.0727979	0.161754	0.440491	0.319373	0.0403847	0.278989	0.4803	0.244655	0.0575224	0.187132	0.468966	0.275281	0.0329675	0.242313	0.463287	0.198617	0.00950191	0.189115	0.434772	0.146098	0.0216173	0.124481	0.467074	0.0477081	0.00741968	0.0402884	0.434772	0.0593864	0.0149176	0.0444688	0.423306	0.0377378	0.00660004	0.0311378
0.451906	0.228062	0.096109	0.131953	0.470857	0.234281	0.068723	0.165558	0.442396	0.317496	0.0383608	0.279135	0.482186	0.249055	0.0536974	0.195358	0.470857	0.276825	0.0311494	0.245676	0.465181	0.189894	0.00892627	0.180968	0.436679	0.14431	0.0202599	0.12405	0.468966	0.0422165	0.00686588	0.0353506	0.436679	0.064734	0.0138482	0.0508858	0.42522	0.0444876	0.00611377	0.0383739
0.453805	0.232761	0.091354	0.141407	0.472747	0.235906	0.0648773	0.171029	0.4443	0.319642	0.0364394	0.283202	0.484071	0.251109	0.0501279	0.200981	0.472747	0.264467	0.0294322	0.235035	0.467074	0.182848	0.00838574	0.174462	0.438586	0.145204	0.0189882	0.126216	0.470857	0.0535429	0.00635365	0.0471893	0.438586	0.0576977	0.0128558	0.0448419	0.427132	0.0392718	0.00566353	0.0336083
0.455703	0.231932	0.0868321	0.1451	0.474637	0.239698	0.061248	0.17845	0.446203	0.330636	0.034615	0.296021	0.485955	0.253455	0.046797	0.206658	0.474637	0.265703	0.0278104	0.237893	0.468966	0.17077	0.00787818	0.162892	0.440491	0.144608	0.017797	0.126811	0.472747	0.045992	0.00587983	0.0401122	0.440491	0.0562905	0.011935	0.0443555	0.429044	0.0454081	0.00524666	0.0401614
0.457601	0.22972	0.0825318	0.147188	0.476525	0.245657	0.0578228	0.187834	0.448105	0.333049	0.0328827	0.300167	0.487839	0.251695	0.0436887	0.208007	0.476525	0.269719	0.0262786	0.243441	0.470857	0.170099	0.00740156	0.162698	0.442396	0.137154	0.016681	0.120473	0.474637	0.0562887	0.00544154	0.0508472	0.442396	0.059105	0.0110805	0.0480244	0.430954	0.0417263	0.00486067	0.0368657
0.459497	0.231379	0.0784433	0.152936	0.478413	0.25297	0.0545904	0.198379	0.450006	0.331709	0.0312378	0.300471	0.489721	0.255802	0.040788	0.215014	0.478413	0.267866	0.024832	0.243034	0.472747	0.167415	0.00695396	0.160461	0.4443	0.130892	0.0156355	0.115257	0.476525	0.0507971	0.00503609	0.045761	0.4443	0.0636083	0.0102877	0.0533206	0.432863	0.0392718	0.00450326	0.0347686
0.461393	0.241331	0.0745561	0.166775	0.4803	0.255407	0.0515396	0.203868	0.451906	0.333318	0.0296759	0.303642	0.491603	0.261376	0.038081	0.223295	0.4803	0.263849	0.0234654	0.240384	0.474637	0.161376	0.00653362	0.154843	0.446203	0.12642	0.0146559	0.111764	0.478413	0.0439327	0.00466104	0.0392716	0.446203	0.0593864	0.00955185	0.0498346	0.434772	0.0380446	0.00417227	0.0338723
0.463287	0.243819	0.0708609	0.172958	0.482186	0.255136	0.0486606	0.206476	0.453805	0.33734	0.0281928	0.309147	0.493484	0.27223	0.0355546	0.236675	0.482186	0.260142	0.0221747	0.237967	0.476525	0.15735	0.00613885	0.151211	0.448105	0.125525	0.0137382	0.111787	0.4803	0.0415301	0.00431404	0.037216	0.448105	0.0478469	0.00886899	0.0389779	0.436679	0.0371242	0.00386577	0.0332584
0.465181	0.244372	0.0673483	0.177023	0.484071	0.254595	0.0459431	0.208652	0.455703	0.340021	0.0267845	0.313237	0.495364	0.27839	0.0331969	0.245193	0.484071	0.253963	0.0209555	0.233007	0.478413	0.158021	0.00576813	0.152253	0.450006	0.115686	0.0128784	0.102808	0.482186	0.0425598	0.00399304	0.0385667	0.450006	0.0498171	0.00823524	0.0415819	0.438586	0.0340561	0.00358191	0.0304741
0.467074	0.253218	0.0640095	0.189208	0.485955	0.255136	0.0433785	0.211758	0.457601	0.338144	0.025447	0.312697	0.497244	0.285137	0.0309964	0.254141	0.485955	0.24871	0.0198038	0.228906	0.4803	0.147285	0.00541991	0.141865	0.451906	0.10853	0.0120727	0.0964577	0.484071	0.0466784	0.00369603	0.0429824	0.451906	0.0470025	0.00764704	0.0393554	0.440491	0.0404991	0.00331903	0.0371801
0.468966	0.259576	0.0608361	0.198739	0.487839	0.254053	0.0409579	0.213095	0.459497	0.340826	0.024177	0.316649	0.499122	0.288951	0.0289424	0.260008	0.487839	0.254889	0.0187158	0.236174	0.482186	0.14393	0.00509289	0.138837	0.453805	0.111214	0.0113178	0.0998959	0.485955	0.045992	0.00342124	0.0425708	0.453805	0.0517872	0.0071011	0.0446861	0.442396	0.0288403	0.00307554	0.0257647
0.470857	0.262064	0.0578202	0.204243	0.489721	0.268137	0.0386733	0.229464	0.461393	0.34163	0.0229709	0.318659	0.501	0.288951	0.0270255	0.261925	0.489721	0.245003	0.0176881	0.227315	0.484071	0.141917	0.00478571	0.137131	0.455703	0.107636	0.0106104	0.0970254	0.487839	0.0480513	0.00316699	0.0448843	0.455703	0.0416549	0.0065944	0.0350605	0.4443	0.0383514	0.00285004	0.0355014
0.472747	0.264828	0.0549538	0.209874	0.491603	0.274908	0.0365169	0.238391	0.463287	0.348602	0.0218255	0.326777	0.502877	0.304205	0.0252362	0.278969	0.491603	0.238824	0.0167172	0.222106	0.485955	0.138898	0.00449719	0.1344	0.457601	0.101673	0.00994754	0.0917251	0.489721	0.0439327	0.00293173	0.0410009	0.457601	0.0455953	0.00612404	0.0394713	0.446203	0.0309879	0.00264116	0.0283468
0.474637	0.27091	0.0522298	0.21868	0.493484	0.277346	0.0344815	0.242864	0.465181	0.348871	0.0207376	0.328133	0.504753	0.306845	0.023566	0.283279	0.493484	0.24006	0.0158	0.22426	0.487839	0.134872	0.00422617	0.130645	0.459497	0.103163	0.00932639	0.093837	0.491603	0.0391275	0.00271405	0.0364135	0.459497	0.0453138	0.00568745	0.0396264	0.448105	0.0368174	0.00244768	0.0343697
0.476525	0.275056	0.0496411	0.225415	0.495364	0.281679	0.0325604	0.249119	0.467074	0.339217	0.0197045	0.319512	0.506628	0.321219	0.0220069	0.299213	0.495364	0.235116	0.0149335	0.220183	0.489721	0.131852	0.00397161	0.127881	0.461393	0.0966039	0.00874426	0.0878597	0.493484	0.0384411	0.0025126	0.0359285	0.461393	0.0416549	0.00528216	0.0363728	0.450006	0.0331356	0.00226846	0.0308672
0.478413	0.277544	0.0471812	0.230363	0.497244	0.286013	0.030747	0.255266	0.468966	0.340826	0.0187232	0.322103	0.508503	0.32386	0.0205517	0.303308	0.497244	0.229864	0.0141149	0.215749	0.491603	0.131181	0.00373247	0.127449	0.463287	0.0909389	0.00819875	0.0827401	0.495364	0.0435894	0.0023262	0.0412632	0.463287	0.0413735	0.00490593	0.0364676	0.451906	0.0377378	0.00210244	0.0356354
0.4803	0.283626	0.0448434	0.238782	0.499122	0.28845	0.0290352	0.259415	0.470857	0.34458	0.0177913	0.326789	0.510377	0.319753	0.0191932	0.30056	0.499122	0.222449	0.0133414	0.209108	0.493484	0.131181	0.00350783	0.127673	0.465181	0.0891499	0.00768748	0.0814624	0.497244	0.0384411	0.00215369	0.0362874	0.465181	0.0394033	0.00455665	0.0348467	0.453805	0.038965	0.00194863	0.0370164
0.482186	0.293301	0.0426221	0.250679	0.501	0.296847	0.0274194	0.269427	0.472747	0.343507	0.0169061	0.326601	0.51225	0.327086	0.017925	0.309162	0.501	0.220904	0.0126107	0.208293	0.495364	0.134201	0.00329681	0.130904	0.467074	0.0858702	0.00720831	0.0786619	0.499122	0.0329495	0.00199404	0.0309554	0.467074	0.0318041	0.00423238	0.0275717	0.455703	0.0362037	0.00180616	0.0343976
0.484071	0.299936	0.0405111	0.259424	0.502877	0.30118	0.0258942	0.275286	0.474637	0.34458	0.0160653	0.328515	0.514122	0.328553	0.0167411	0.311812	0.502877	0.219977	0.0119202	0.208057	0.497244	0.144266	0.00309856	0.141167	0.468966	0.083783	0.00675922	0.0770238	0.501	0.0326063	0.00184629	0.03076	0.468966	0.0394033	0.00393132	0.035472	0.457601	0.038965	0.00167415	0.0372909
0.485955	0.298553	0.0385053	0.260048	0.504753	0.304972	0.0244543	0.280518	0.476525	0.34163	0.0152667	0.326364	0.515993	0.331487	0.0156358	0.315851	0.504753	0.208237	0.0112679	0.196969	0.499122	0.148292	0.0029123	0.145379	0.470857	0.0846775	0.00633829	0.0783392	0.502877	0.0453055	0.00170954	0.043596	0.470857	0.032367	0.00365181	0.0287152	0.459497	0.0340561	0.00155185	0.0325042
0.487839	0.307952	0.0365992	0.271353	0.506628	0.306326	0.023095	0.283231	0.478413	0.349139	0.0145081	0.334631	0.517864	0.32386	0.0146039	0.309256	0.506628	0.2104	0.0106514	0.199748	0.501	0.151647	0.00273732	0.148909	0.472747	0.0769253	0.00594375	0.0709816	0.504753	0.0439327	0.00158297	0.0423497	0.472747	0.035463	0.00339228	0.0320707	0.461393	0.032522	0.00143853	0.0310835
0.489721	0.31127	0.034788	0.276482	0.508503	0.302805	0.0218118	0.280993	0.4803	0.346189	0.0137876	0.332401	0.519733	0.32914	0.0136404	0.3155	0.508503	0.194952	0.010069	0.184883	0.502877	0.152318	0.00257292	0.149745	0.474637	0.0828886	0.00557393	0.0773147	0.506628	0.0329495	0.00146582	0.0314837	0.474637	0.0312412	0.0031513	0.0280899	0.463287	0.0303743	0.00133355	0.0290408
0.491603	0.313205	0.0330669	0.280138	0.510377	0.308764	0.0206004	0.288163	0.482186	0.333854	0.0131031	0.320751	0.521603	0.335007	0.0127409	0.322266	0.510377	0.197732	0.00951861	0.188214	0.504753	0.153324	0.00241846	0.150906	0.476525	0.0846775	0.00522726	0.0794502	0.508503	0.0353521	0.00135738	0.0339947	0.476525	0.0360259	0.00292753	0.0330984	0.465181	0.0386582	0.00123626	0.037422
0.493484	0.318457	0.0314315	0.287026	0.51225	0.312285	0.0194566	0.292828	0.484071	0.334122	0.0124529	0.321669	0.523471	0.331487	0.011901	0.319586	0.51225	0.196497	0.00899851	0.187498	0.506628	0.160705	0.00227332	0.158432	0.478413	0.0793107	0.00490233	0.0744083	0.510377	0.032263	0.00125701	0.031006	0.478413	0.0365888	0.00271976	0.033869	0.467074	0.0346697	0.00114611	0.0335236
0.495364	0.327303	0.0298774	0.297426	0.514122	0.309847	0.0183769	0.29147	0.485955	0.327686	0.0118352	0.315851	0.525339	0.335594	0.0111168	0.324477	0.514122	0.19248	0.00850706	0.183973	0.508503	0.16708	0.00213696	0.164943	0.4803	0.0721548	0.0045977	0.0675571	0.51225	0.0319198	0.00116409	0.0307557	0.4803	0.0374332	0.0025268	0.0349064	0.468966	0.0380446	0.00106257	0.036982
0.497244	0.321221	0.0284007	0.292821	0.515993	0.314181	0.0173574	0.296823	0.487839	0.330636	0.0112484	0.319388	0.527205	0.347034	0.0103845	0.33665	0.515993	0.193407	0.00804262	0.185364	0.510377	0.164396	0.00200883	0.162387	0.482186	0.0757327	0.00431214	0.0714206	0.514122	0.0305469	0.00107808	0.0294688	0.482186	0.0405291	0.00234763	0.0381815	0.470857	0.0383514	0.00098516	0.0373663
0.499122	0.318181	0.0269973	0.291183	0.517864	0.325014	0.0163949	0.30862	0.489721	0.325273	0.0106909	0.314582	0.529072	0.3353	0.00970076	0.3256	0.517864	0.185683	0.00760372	0.178079	0.51225	0.16708	0.00188843	0.165191	0.484071	0.0635082	0.00404442	0.0594638	0.515993	0.0435894	0.00099846	0.042591	0.484071	0.0399662	0.00218121	0.037785	0.472747	0.0328288	0.000913417	0.0319154
0.501	0.328962	0.0256638	0.303298	0.519733	0.328536	0.0154861	0.313049	0.491603	0.324737	0.0101613	0.314575	0.530937	0.343514	0.00906229	0.334452	0.519733	0.17765	0.00718892	0.170461	0.514122	0.167751	0.00177529	0.165975	0.485955	0.0685769	0.00379343	0.0647835	0.517864	0.0466784	0.000924746	0.0457537	0.485955	0.0481283	0.00202667	0.0461017	0.474637	0.0466353	0.000846929	0.0457884
0.502877	0.332279	0.0243966	0.307882	0.521603	0.330973	0.014628	0.316345	0.493484	0.331709	0.00965813	0.32205	0.532801	0.344101	0.00846605	0.335635	0.521603	0.177032	0.00679691	0.170235	0.515993	0.179493	0.00166897	0.177824	0.487839	0.070664	0.00355812	0.0671059	0.519733	0.0545726	0.000856499	0.0537161	0.487839	0.0430623	0.00188313	0.0411791	0.476525	0.0469421	0.000785305	0.0461568
0.504753	0.325368	0.0231923	0.302176	0.523471	0.327723	0.0138178	0.313905	0.495364	0.323396	0.0091801	0.314216	0.534665	0.353781	0.00790925	0.345872	0.523471	0.184447	0.00642643	0.178021	0.517864	0.179829	0.00156906	0.17826	0.489721	0.0778199	0.00333751	0.0744824	0.521603	0.0473649	0.000793315	0.0465716	0.489721	0.0500986	0.00174983	0.0483487	0.478413	0.0503171	0.000728195	0.0495889
0.506628	0.32675	0.0220479	0.304702	0.525339	0.335848	0.0130528	0.322796	0.497244	0.322055	0.00872592	0.313329	0.536528	0.344101	0.00738925	0.336712	0.525339	0.185374	0.00607627	0.179298	0.519733	0.169764	0.00147517	0.168289	0.491603	0.0799069	0.00313066	0.0767762	0.523471	0.0449623	0.000734816	0.0442275	0.491603	0.0405291	0.001626	0.0389031	0.4803	0.0543056	0.000675256	0.0536304
0.508503	0.324262	0.0209604	0.303302	0.527205	0.344786	0.0123303	0.332456	0.499122	0.316692	0.00829436	0.308397	0.538391	0.342341	0.00690364	0.335437	0.527205	0.199277	0.00574531	0.193532	0.521603	0.179829	0.00138693	0.178442	0.493484	0.0700677	0.00293671	0.067131	0.525339	0.0432462	0.00068065	0.0425655	0.493484	0.0470025	0.00151099	0.0454915	0.482186	0.0552261	0.000626192	0.0545999
0.510377	0.328962	0.0199269	0.309035	0.529072	0.347495	0.0116482	0.335847	0.501	0.3242	0.00788434	0.316316	0.540253	0.344394	0.00645009	0.337944	0.529072	0.198968	0.00543251	0.193536	0.523471	0.176809	0.001304	0.175505	0.495364	0.076329	0.00275486	0.0735741	0.527205	0.0573184	0.000630495	0.0566879	0.495364	0.0447509	0.00140417	0.0433467	0.484071	0.0539988	0.000580708	0.0534181
0.51225	0.332279	0.0189446	0.313334	0.530937	0.350745	0.011004	0.339741	0.502877	0.324468	0.00749475	0.316974	0.542114	0.340287	0.00602651	0.334261	0.530937	0.197732	0.00513686	0.192596	0.525339	0.181506	0.00122606	0.18028	0.497244	0.0754345	0.00258434	0.0728502	0.529072	0.0604074	0.000584055	0.0598233	0.497244	0.0436251	0.00130493	0.0423201	0.485955	0.0595214	0.000538548	0.0589828
0.514122	0.330344	0.0180112	0.312333	0.532801	0.355349	0.0103957	0.344954	0.504753	0.316424	0.00712457	0.309299	0.543974	0.334714	0.00563089	0.329083	0.532801	0.205765	0.00485741	0.200908	0.527205	0.1909	0.00115281	0.189748	0.499122	0.0846775	0.00242443	0.0822531	0.530937	0.061437	0.000541054	0.0608959	0.499122	0.044188	0.00121274	0.0429752	0.487839	0.0625895	0.000499464	0.06209
0.515993	0.332002	0.0171241	0.314878	0.534665	0.361308	0.0098212	0.351487	0.506628	0.315619	0.00677279	0.308846	0.545834	0.338234	0.00526137	0.332972	0.534665	0.2104	0.00459325	0.205806	0.529072	0.187881	0.00108396	0.186797	0.501	0.078118	0.00227449	0.0758435	0.532801	0.0658989	0.000501232	0.0653977	0.501	0.0531945	0.00112711	0.0520674	0.489721	0.0678053	0.000463234	0.0673421
0.517864	0.33145	0.0162809	0.315169	0.536528	0.362662	0.00927866	0.353383	0.508503	0.323396	0.00643854	0.316957	0.547693	0.340581	0.00491623	0.335664	0.536528	0.211018	0.00434355	0.206674	0.530937	0.192913	0.00101925	0.191894	0.502877	0.0849757	0.00213388	0.0828418	0.534665	0.0717338	0.000464355	0.0712694	0.502877	0.0478469	0.00104755	0.0467993	0.491603	0.0693394	0.000429645	0.0689097
0.519733	0.329791	0.0154796	0.314311	0.538391	0.364558	0.0087663	0.355792	0.510377	0.322591	0.00612092	0.31647	0.549551	0.331193	0.00459385	0.3266	0.538391	0.212562	0.00410752	0.208455	0.532801	0.194591	0.00095842	0.193632	0.504753	0.0954113	0.00200201	0.0934092	0.536528	0.0761957	0.000430204	0.0757655	0.504753	0.056009	0.000973641	0.0550354	0.493484	0.0674985	0.000398505	0.0671
0.521603	0.326197	0.014718	0.311479	0.540253	0.365641	0.00828239	0.357359	0.51225	0.322055	0.00581908	0.316236	0.551408	0.327967	0.00429271	0.323674	0.540253	0.21627	0.00388439	0.212385	0.534665	0.190565	0.000901246	0.189664	0.506628	0.0927279	0.00187834	0.0908496	0.538391	0.0799711	0.000398577	0.0795725	0.506628	0.0540388	0.00090497	0.0531338	0.495364	0.0671917	0.000369635	0.0668221
0.523471	0.318457	0.0139941	0.304463	0.542114	0.375392	0.00782538	0.367566	0.514122	0.317496	0.00553226	0.311964	0.553265	0.3309	0.00401144	0.326889	0.542114	0.220286	0.00367347	0.216613	0.536528	0.192578	0.000847501	0.19173	0.508503	0.103462	0.00176237	0.101699	0.540253	0.0799711	0.000369284	0.0796018	0.508503	0.0551646	0.000841173	0.0543235	0.497244	0.0711803	0.000342868	0.0708374
0.525339	0.32288	0.0133061	0.309574	0.543974	0.374308	0.00739374	0.366915	0.515993	0.325541	0.00525967	0.320281	0.555121	0.319459	0.00374866	0.315711	0.543974	0.215034	0.00347407	0.21156	0.538391	0.188552	0.000796983	0.187755	0.510377	0.109425	0.00165359	0.107771	0.542114	0.0916407	0.000342156	0.0912985	0.510377	0.0607936	0.000781897	0.0600117	0.499122	0.0742484	0.000318047	0.0739303
0.527205	0.321774	0.0126522	0.309122	0.545834	0.372954	0.00698606	0.365968	0.517864	0.329295	0.00500062	0.324295	0.556976	0.319459	0.0035032	0.315956	0.545834	0.218432	0.00328557	0.215147	0.540253	0.181171	0.000749491	0.180421	0.51225	0.108232	0.00155157	0.106681	0.543974	0.0957594	0.000317029	0.0954424	0.51225	0.061638	0.000726818	0.0609112	0.501	0.0754756	0.000295035	0.0751805
0.529072	0.319839	0.0120306	0.307809	0.547693	0.372954	0.006601	0.366353	0.519733	0.323396	0.00475442	0.318641	0.558831	0.312126	0.00327389	0.308852	0.547693	0.215652	0.00310736	0.212545	0.542114	0.18419	0.000704847	0.183485	0.514122	0.111512	0.00145589	0.110056	0.545834	0.107772	0.000293756	0.107478	0.514122	0.0641712	0.000675642	0.0634955	0.502877	0.0776232	0.000273696	0.0773495
0.530937	0.318733	0.0114398	0.307294	0.549551	0.36835	0.00623729	0.362112	0.521603	0.318033	0.00452044	0.313512	0.560685	0.313592	0.00305967	0.310533	0.549551	0.227701	0.00293887	0.224762	0.543974	0.186203	0.000662878	0.18554	0.515993	0.114195	0.00136614	0.112829	0.547693	0.110175	0.000272199	0.109903	0.515993	0.0700816	0.000628087	0.0694535	0.504753	0.0938843	0.000253908	0.0936304
0.532801	0.31431	0.0108782	0.303432	0.551408	0.366183	0.00589375	0.360289	0.523471	0.314547	0.00429807	0.310249	0.562539	0.309192	0.00285953	0.306333	0.551408	0.225847	0.00277958	0.223068	0.545834	0.175132	0.000623422	0.174508	0.517864	0.118071	0.00128196	0.11679	0.549551	0.108802	0.000252232	0.10855	0.517864	0.0675486	0.000583898	0.0669647	0.506628	0.0972592	0.000235558	0.0970237
0.534665	0.323433	0.0103444	0.313088	0.553265	0.362391	0.00556927	0.356822	0.525339	0.315083	0.00408671	0.310996	0.564391	0.301565	0.00267255	0.298892	0.553265	0.221522	0.00262899	0.218893	0.547693	0.171441	0.000586329	0.170855	0.519733	0.122246	0.00120299	0.121043	0.551408	0.112577	0.000233736	0.112344	0.519733	0.0712075	0.000542832	0.0706646	0.508503	0.0908162	0.000218542	0.0905976
0.536528	0.33062	0.00983692	0.320783	0.555121	0.368621	0.00526273	0.363358	0.527205	0.308915	0.00388582	0.30503	0.566244	0.300978	0.00249785	0.29848	0.555121	0.218742	0.0024866	0.216255	0.549551	0.167751	0.000551455	0.167199	0.521603	0.127613	0.00112892	0.126484	0.553265	0.108459	0.000216603	0.108242	0.521603	0.0728961	0.00050467	0.0723915	0.510377	0.0822255	0.000202761	0.0820227
0.538391	0.320945	0.00935455	0.31159	0.556976	0.359412	0.00497319	0.354439	0.529072	0.315083	0.00369489	0.311388	0.568095	0.304792	0.00233464	0.302457	0.556976	0.209782	0.00235197	0.20743	0.551408	0.166744	0.000518667	0.166226	0.523471	0.125227	0.00105944	0.124168	0.555121	0.128022	0.00020073	0.127822	0.523471	0.0717703	0.000469206	0.0713011	0.51225	0.092657	0.000188125	0.0924688
0.540253	0.313757	0.00889598	0.304862	0.558831	0.359141	0.00469967	0.354441	0.530937	0.308379	0.00351341	0.304866	0.569946	0.300098	0.00218214	0.297916	0.558831	0.223376	0.00222468	0.221151	0.553265	0.172783	0.000487842	0.172295	0.525339	0.121351	0.00099426	0.120357	0.556976	0.121844	0.000186027	0.121658	0.525339	0.0751477	0.000436245	0.0747115	0.514122	0.0902026	0.000174552	0.090028
0.542114	0.318733	0.00846007	0.310273	0.560685	0.353182	0.00444128	0.348741	0.532801	0.308915	0.00334091	0.305574	0.571796	0.288951	0.00203964	0.286911	0.560685	0.22523	0.00210431	0.223125	0.555121	0.166073	0.000458856	0.165614	0.527205	0.122842	0.000933111	0.121909	0.558831	0.125963	0.000172405	0.125791	0.527205	0.0802139	0.000405611	0.0798083	0.515993	0.0987933	0.000161963	0.0986313
0.543974	0.329238	0.00804566	0.321192	0.562539	0.346411	0.00419719	0.342214	0.534665	0.307843	0.00317694	0.304666	0.573645	0.286017	0.0019065	0.284111	0.562539	0.227392	0.0019905	0.225402	0.556976	0.159028	0.000431604	0.158596	0.529072	0.123737	0.000875747	0.122861	0.560685	0.126306	0.000159785	0.126147	0.529072	0.0785252	0.00037714	0.0781481	0.517864	0.0865208	0.000150287	0.0863705
0.545834	0.320945	0.0076517	0.313293	0.564391	0.345599	0.00396659	0.341632	0.536528	0.310792	0.00302107	0.307771	0.575494	0.28191	0.00178209	0.280128	0.564391	0.225847	0.00188289	0.223965	0.558831	0.153995	0.00040598	0.153589	0.530937	0.121351	0.000821931	0.120529	0.562539	0.132828	0.000148093	0.13268	0.530937	0.0869687	0.000350679	0.0866181	0.519733	0.0877481	0.000139456	0.0876086
0.547693	0.324262	0.00727716	0.316985	0.566244	0.349661	0.00374874	0.345913	0.538391	0.303016	0.00287291	0.300143	0.577342	0.278097	0.00166584	0.276431	0.566244	0.222449	0.00178112	0.220668	0.560685	0.142588	0.000381884	0.142206	0.532801	0.124631	0.000771441	0.12386	0.564391	0.130425	0.00013726	0.130288	0.532801	0.0937236	0.000326083	0.0933975	0.521603	0.0840663	0.00012941	0.0839369
0.549551	0.330067	0.00692108	0.323146	0.568095	0.340994	0.00354293	0.337451	0.540253	0.298725	0.00273207	0.295993	0.57919	0.272817	0.0015572	0.271259	0.568095	0.230173	0.0016849	0.228488	0.562539	0.149298	0.000359227	0.148939	0.534665	0.122246	0.00072407	0.121522	0.566244	0.12665	0.000127223	0.126522	0.534665	0.0925977	0.00030322	0.0922945	0.523471	0.0849867	0.000120091	0.0848666
0.551408	0.328962	0.00658255	0.322379	0.569946	0.329077	0.00334848	0.325729	0.542114	0.296848	0.00259818	0.29425	0.581037	0.269296	0.00145569	0.267841	0.569946	0.219051	0.00159389	0.217457	0.564391	0.142924	0.000337923	0.142586	0.536528	0.113301	0.000679623	0.112621	0.568095	0.125277	0.000117924	0.125159	0.536528	0.100197	0.000281968	0.099915	0.525339	0.0880548	0.000111447	0.0879434
0.553265	0.325091	0.00626071	0.318831	0.571796	0.32664	0.00316475	0.323475	0.543974	0.294971	0.0024709	0.2925	0.582883	0.26959	0.00136082	0.268229	0.571796	0.222449	0.00150783	0.220941	0.566244	0.139904	0.000317887	0.139586	0.538391	0.115984	0.000637923	0.115346	0.569946	0.121158	0.000109307	0.121049	0.538391	0.0973825	0.000262214	0.0971203	0.527205	0.0978728	0.000103428	0.0977694
0.555121	0.328962	0.00595469	0.323007	0.573645	0.329077	0.00299118	0.326086	0.545834	0.300334	0.0023499	0.297985	0.584729	0.271056	0.00127216	0.269784	0.573645	0.212253	0.00142645	0.210827	0.568095	0.131852	0.000299048	0.131553	0.540253	0.103462	0.000598793	0.102863	0.571796	0.120815	0.000101322	0.120713	0.540253	0.0965381	0.000243849	0.0962942	0.529072	0.101555	9.59885e-05	0.101459
0.556976	0.318733	0.00566374	0.31307	0.575494	0.329348	0.00282717	0.326521	0.547693	0.292022	0.00223487	0.289787	0.586574	0.260789	0.00118931	0.2596	0.575494	0.2104	0.00134949	0.20905	0.569946	0.132188	0.00028133	0.131906	0.542114	0.0989892	0.000562079	0.0984271	0.573645	0.122531	9.39229e-05	0.122437	0.542114	0.0973825	0.000226778	0.0971557	0.530937	0.103395	8.90873e-05	0.103306
0.558831	0.31127	0.00538711	0.305882	0.577342	0.329619	0.00267222	0.326947	0.549551	0.292826	0.00212551	0.2907	0.588418	0.270176	0.00111188	0.269065	0.577342	0.208855	0.0012767	0.207578	0.571796	0.132859	0.000264667	0.132594	0.543974	0.101971	0.000527628	0.101443	0.575494	0.119442	8.70662e-05	0.119355	0.543974	0.0956938	0.000210908	0.0954829	0.532801	0.10002	8.26845e-05	0.0999378
0.560685	0.31127	0.00512408	0.306145	0.57919	0.322577	0.0025258	0.320051	0.551408	0.277809	0.00202154	0.275788	0.590262	0.26871	0.00103951	0.26767	0.57919	0.219668	0.00120786	0.21846	0.573645	0.12078	0.000248997	0.120531	0.545834	0.0989892	0.000495301	0.0984939	0.577342	0.11395	8.07128e-05	0.11387	0.545834	0.1047	0.000196153	0.104504	0.534665	0.0920434	7.67441e-05	0.0919666
0.562539	0.31127	0.00487398	0.306396	0.581037	0.318243	0.00238745	0.315856	0.553265	0.275396	0.0019227	0.273473	0.592105	0.270763	0.000971876	0.269791	0.581037	0.212871	0.00114276	0.211729	0.575494	0.108367	0.000234259	0.108133	0.547693	0.0995855	0.000464965	0.0991205	0.57919	0.117383	7.48245e-05	0.117308	0.547693	0.10667	0.000182436	0.106488	0.536528	0.0843731	7.12324e-05	0.0843019
0.564391	0.303529	0.00463617	0.298893	0.582883	0.319056	0.00225672	0.316799	0.555121	0.282904	0.00182871	0.281076	0.593948	0.270176	0.000908658	0.269268	0.582883	0.198659	0.00108118	0.197578	0.577342	0.10669	0.000220399	0.106469	0.549551	0.0963058	0.000436498	0.0958693	0.581037	0.110175	6.93678e-05	0.110105	0.549551	0.100197	0.000169682	0.100027	0.538391	0.10002	6.61187e-05	0.0999544
0.566244	0.312099	0.00441004	0.307689	0.584729	0.314181	0.00213319	0.312047	0.556976	0.283977	0.00173936	0.282238	0.59579	0.27135	0.000849572	0.2705	0.584729	0.187846	0.00102294	0.186823	0.57919	0.105683	0.000207363	0.105476	0.551408	0.0986911	0.000409784	0.0982813	0.582883	0.112921	6.43103e-05	0.112856	0.551408	0.100197	0.000157825	0.100039	0.540253	0.102168	6.13736e-05	0.102107
0.568095	0.307952	0.00419503	0.303757	0.586574	0.311472	0.00201647	0.309456	0.558831	0.281027	0.0016544	0.279373	0.597632	0.27575	0.000794345	0.274956	0.586574	0.184756	0.000967862	0.183788	0.581037	0.0885724	0.000195102	0.0883773	0.553265	0.0858702	0.000384714	0.0854855	0.584729	0.119442	5.96233e-05	0.119382	0.553265	0.103574	0.000146801	0.103428	0.542114	0.10585	5.69709e-05	0.105793
0.569946	0.299383	0.00399055	0.295392	0.588418	0.310118	0.00190616	0.308212	0.560685	0.275396	0.00157362	0.273822	0.599473	0.278097	0.000742724	0.277354	0.588418	0.178886	0.00091576	0.17797	0.582883	0.0875659	0.000183569	0.0873823	0.555121	0.0933241	0.000361185	0.0929629	0.586574	0.110861	5.52795e-05	0.110806	0.555121	0.104137	0.000136549	0.104001	0.543974	0.100941	5.28855e-05	0.100888
0.571796	0.29413	0.0037961	0.290334	0.590262	0.305514	0.00180192	0.303712	0.562539	0.277273	0.00149681	0.275776	0.601313	0.278097	0.000694474	0.277402	0.590262	0.171162	0.000866478	0.170296	0.584729	0.0838754	0.000172722	0.0837026	0.556976	0.0891499	0.000339104	0.0888108	0.588418	0.105026	5.12531e-05	0.104975	0.556976	0.103293	0.000127017	0.103166	0.545834	0.0981796	4.90944e-05	0.0981305
0.573645	0.29413	0.0036112	0.290519	0.592105	0.303618	0.00170341	0.301914	0.564391	0.27191	0.00142378	0.270486	0.603153	0.275163	0.000649369	0.274514	0.592105	0.171471	0.000819866	0.170651	0.586574	0.0801849	0.000162519	0.0800224	0.558831	0.0828886	0.00031838	0.0825702	0.590262	0.098162	4.75212e-05	0.0981145	0.558831	0.0948494	0.000118154	0.0947313	0.547693	0.0981796	4.55763e-05	0.098134
0.575494	0.293025	0.00343536	0.289589	0.593948	0.308493	0.00161032	0.306883	0.566244	0.264402	0.00135433	0.263047	0.604992	0.27927	0.000607207	0.278663	0.593948	0.162202	0.000775773	0.161427	0.588418	0.0764944	0.000152922	0.0763414	0.560685	0.0790124	0.000298929	0.0787135	0.592105	0.0998781	4.40624e-05	0.0998341	0.560685	0.0959753	0.000109912	0.0958654	0.549551	0.0865208	4.23116e-05	0.0864785
0.577342	0.287219	0.00326815	0.283951	0.59579	0.298201	0.00152234	0.296678	0.568095	0.265742	0.0012883	0.264454	0.606831	0.27399	0.000567796	0.273422	0.59579	0.16282	0.000734065	0.162086	0.590262	0.0704553	0.000143894	0.0703114	0.562539	0.0805032	0.000280673	0.0802226	0.593948	0.0912975	4.08561e-05	0.0912566	0.562539	0.0875317	0.000102248	0.0874294	0.551408	0.0929638	3.92818e-05	0.0929245
0.57919	0.288049	0.00310912	0.28494	0.597632	0.287638	0.00143919	0.286199	0.569946	0.267888	0.0012255	0.266662	0.608668	0.275457	0.000530954	0.274926	0.597632	0.143974	0.000694611	0.143279	0.592105	0.0570352	0.000135403	0.0568998	0.564391	0.0769253	0.000263539	0.0766618	0.59579	0.0888949	3.7884e-05	0.088857	0.564391	0.0920349	9.51202e-05	0.0919398	0.553265	0.0794641	3.64701e-05	0.0794277
0.581037	0.281691	0.00295788	0.278733	0.599473	0.287096	0.00136061	0.285736	0.571796	0.25877	0.00116579	0.257604	0.610506	0.279564	0.000496511	0.279067	0.599473	0.141811	0.00065729	0.141154	0.593948	0.0553578	0.000127414	0.0552304	0.566244	0.076329	0.000247455	0.0760815	0.597632	0.0912975	3.5129e-05	0.0912624	0.566244	0.0951309	8.84918e-05	0.0950424	0.555121	0.0770096	3.38603e-05	0.0769758
0.582883	0.277544	0.00281404	0.27473	0.601313	0.280054	0.00128634	0.278768	0.573645	0.262524	0.001109	0.261415	0.612343	0.27575	0.000464313	0.275286	0.601313	0.131925	0.000621985	0.131303	0.59579	0.0506607	0.0001199	0.0505408	0.568095	0.078118	0.000232359	0.0778856	0.599473	0.0985052	3.25752e-05	0.0984726	0.568095	0.0996342	8.23278e-05	0.0995518	0.556976	0.0678053	3.14383e-05	0.0677739
0.584729	0.267316	0.00267724	0.264639	0.603153	0.280054	0.00121615	0.278838	0.575494	0.256089	0.001055	0.255034	0.614179	0.27399	0.000434211	0.273556	0.603153	0.116786	0.000588585	0.116197	0.597632	0.0499897	0.000112831	0.0498769	0.569946	0.0748382	0.000218188	0.07462	0.601313	0.096446	3.02077e-05	0.0964158	0.569946	0.0954124	7.65947e-05	0.0953358	0.558831	0.0671917	2.91904e-05	0.0671626
0.586574	0.27395	0.00254714	0.271403	0.604992	0.271658	0.00114981	0.270508	0.577342	0.253675	0.00100365	0.252672	0.616015	0.275163	0.000406069	0.274757	0.604992	0.111224	0.000556989	0.110667	0.599473	0.0476412	0.00010618	0.047535	0.571796	0.0736456	0.000204885	0.0734407	0.603153	0.0892381	2.80129e-05	0.0892101	0.571796	0.0866873	7.12625e-05	0.086616	0.560685	0.0656576	2.71039e-05	0.0656304
0.588418	0.27091	0.0024234	0.268486	0.606831	0.267866	0.0010871	0.266779	0.57919	0.246971	0.00095481	0.246017	0.61785	0.273403	0.000379758	0.273023	0.606831	0.11555	0.000527099	0.115023	0.601313	0.0473057	9.99237e-05	0.0472058	0.573645	0.0682787	0.000192399	0.0680863	0.604992	0.085806	2.59782e-05	0.08578	0.573645	0.0855616	6.63035e-05	0.0854953	0.562539	0.071487	2.51672e-05	0.0714619
0.590262	0.263999	0.00230571	0.261693	0.608668	0.276804	0.00102784	0.275776	0.581037	0.244826	0.000908365	0.243918	0.619685	0.266363	0.00035516	0.266008	0.608668	0.110607	0.000498821	0.110108	0.603153	0.0345567	9.40375e-05	0.0344626	0.575494	0.070664	0.000180677	0.0704834	0.606831	0.0755093	2.40919e-05	0.0754852	0.575494	0.0886575	6.16909e-05	0.0885958	0.564391	0.0702598	2.33695e-05	0.0702365
0.592105	0.259852	0.00219377	0.257658	0.610506	0.258928	0.000971819	0.257956	0.582883	0.243217	0.000864191	0.242353	0.621519	0.26959	0.000332161	0.269258	0.610506	0.107208	0.000472068	0.106736	0.604992	0.0345567	8.84998e-05	0.0344682	0.577342	0.0724529	0.000169673	0.0722833	0.608668	0.081344	2.23431e-05	0.0813217	0.577342	0.0861244	5.74009e-05	0.086067	0.566244	0.0656576	2.17008e-05	0.0656358
0.593948	0.2546	0.00208729	0.252512	0.612343	0.25324	0.00091887	0.252322	0.584729	0.245362	0.00082218	0.24454	0.623353	0.265483	0.000310657	0.265172	0.612343	0.0997931	0.000446758	0.0993463	0.606831	0.0325436	8.32898e-05	0.0324604	0.57919	0.0697695	0.000159342	0.0696101	0.610506	0.0926704	2.07217e-05	0.0926497	0.57919	0.0976639	5.34103e-05	0.0976105	0.568095	0.0567601	2.01519e-05	0.05674
0.59579	0.243266	0.00198602	0.24128	0.614179	0.247011	0.000868819	0.246142	0.586574	0.251798	0.000782227	0.251016	0.625186	0.266363	0.000290551	0.266072	0.614179	0.0967035	0.00042281	0.0962807	0.608668	0.0315371	7.83881e-05	0.0314587	0.581037	0.0682787	0.000149644	0.068129	0.612343	0.0943866	1.92184e-05	0.0943674	0.581037	0.0897832	4.96985e-05	0.0897335	0.569946	0.0659644	1.87139e-05	0.0659457
0.597632	0.240778	0.00188969	0.238888	0.616015	0.239427	0.000821509	0.238606	0.588418	0.256089	0.000744225	0.255344	0.627019	0.265189	0.000271752	0.264918	0.616015	0.0960856	0.000400154	0.0956854	0.610506	0.0295241	7.37761e-05	0.0294504	0.582883	0.0697695	0.000140539	0.0696289	0.614179	0.0854628	1.78245e-05	0.0854449	0.582883	0.0841542	4.62455e-05	0.084108	0.571796	0.0622827	1.73789e-05	0.0622654
0.599473	0.233314	0.00179806	0.231516	0.61785	0.229135	0.000776787	0.228358	0.590262	0.250994	0.000708081	0.250286	0.628851	0.259616	0.000254173	0.259362	0.61785	0.0865079	0.000378718	0.0861292	0.612343	0.0224786	6.94368e-05	0.0224092	0.584729	0.0626136	0.00013199	0.0624816	0.616015	0.0799711	1.65322e-05	0.0799546	0.584729	0.0864058	4.30337e-05	0.0863628	0.573645	0.060135	1.61397e-05	0.0601188
0.601313	0.234973	0.0017109	0.233262	0.619685	0.223718	0.000734513	0.222984	0.592105	0.245362	0.000673705	0.244689	0.630683	0.260202	0.000237736	0.259965	0.619685	0.0809467	0.000358436	0.0805883	0.614179	0.0281821	6.53538e-05	0.0281168	0.586574	0.0685769	0.000123965	0.0684529	0.61785	0.0713906	1.53338e-05	0.0713753	0.586574	0.0830284	4.0046e-05	0.0829884	0.575494	0.0558397	1.49891e-05	0.0558247
0.603153	0.22585	0.00162799	0.224222	0.621519	0.218843	0.00069455	0.218149	0.593948	0.249653	0.000641006	0.249012	0.632514	0.257269	0.000222367	0.257047	0.621519	0.0760034	0.000339246	0.0756641	0.616015	0.0248271	6.15121e-05	0.0247656	0.588418	0.0700677	0.000116429	0.0699513	0.619685	0.070704	1.42227e-05	0.0706898	0.588418	0.0838728	3.72664e-05	0.0838355	0.577342	0.0555328	1.3921e-05	0.0555189
0.604992	0.223086	0.00154912	0.221537	0.623353	0.212885	0.000656772	0.212228	0.59579	0.243485	0.000609904	0.242875	0.634344	0.259909	0.000207994	0.259701	0.623353	0.0630272	0.000321087	0.0627062	0.61785	0.0308661	5.78972e-05	0.0308082	0.590262	0.0721548	0.000109354	0.0720455	0.621519	0.0724202	1.31923e-05	0.072407	0.590262	0.091472	3.46806e-05	0.0914373	0.57919	0.052158	1.29293e-05	0.0521451
0.606831	0.217557	0.0014741	0.216083	0.625186	0.200696	0.000621058	0.200075	0.597632	0.248044	0.000580321	0.247464	0.636174	0.251695	0.000194555	0.251501	0.625186	0.0630272	0.000303906	0.0627233	0.619685	0.0265046	5.44958e-05	0.0264501	0.592105	0.068875	0.000102712	0.0687723	0.623353	0.0737932	1.22369e-05	0.0737809	0.592105	0.0911906	3.22751e-05	0.0911583	0.581037	0.0530783	1.20086e-05	0.0530663
0.608668	0.212858	0.00140273	0.211455	0.627019	0.194196	0.000587296	0.193609	0.599473	0.24429	0.000552182	0.243738	0.638004	0.242308	0.000181987	0.242126	0.627019	0.0630272	0.000287648	0.0627396	0.621519	0.0244916	5.12951e-05	0.0244403	0.593948	0.0733474	9.64739e-05	0.0732509	0.625186	0.0737932	1.13509e-05	0.0737818	0.593948	0.0779623	3.0037e-05	0.0779323	0.582883	0.0518511	1.11536e-05	0.05184
0.610506	0.208158	0.00133483	0.206823	0.628851	0.197175	0.000555379	0.19662	0.601313	0.248044	0.000525415	0.247519	0.639833	0.235854	0.000170233	0.235684	0.628851	0.0617914	0.000272265	0.0615191	0.623353	0.0224786	4.82832e-05	0.0224303	0.59579	0.0685769	9.06169e-05	0.0684863	0.627019	0.0830602	1.05292e-05	0.0830497	0.59579	0.0810583	2.79548e-05	0.0810303	0.584729	0.0613623	1.03598e-05	0.0613519
0.612343	0.192954	0.00127025	0.191684	0.630683	0.190946	0.000525202	0.190421	0.603153	0.242949	0.000499953	0.242449	0.641662	0.22324	0.000159241	0.223081	0.630683	0.0519048	0.000257707	0.0516471	0.625186	0.0187881	4.54489e-05	0.0187426	0.597632	0.0673842	8.51173e-05	0.0672991	0.628851	0.0840898	9.7673e-06	0.08408	0.597632	0.0813397	2.60175e-05	0.0813137	0.586574	0.0598282	9.62281e-06	0.0598186
0.614179	0.191848	0.0012088	0.190639	0.632514	0.181466	0.000496676	0.18097	0.604992	0.238659	0.000475733	0.238183	0.64349	0.21796	0.000148963	0.217811	0.632514	0.0525227	0.000243933	0.0522787	0.627019	0.0124136	4.27818e-05	0.0123708	0.599473	0.06321	7.9953e-05	0.06313	0.630683	0.0765389	9.06065e-06	0.0765299	0.599473	0.076555	2.42151e-05	0.0765308	0.588418	0.0586009	8.9384e-06	0.058592
0.616015	0.178579	0.00115034	0.177429	0.634344	0.179571	0.000469705	0.179101	0.606831	0.243754	0.000452693	0.243301	0.645317	0.212093	0.00013935	0.211953	0.634344	0.0398554	0.000230898	0.0396245	0.628851	0.0187881	4.02719e-05	0.0187478	0.601313	0.0641044	7.51037e-05	0.0640293	0.632514	0.0765389	8.40536e-06	0.0765305	0.601313	0.0717703	2.2538e-05	0.0717477	0.590262	0.0647372	8.30286e-06	0.0647289
0.61785	0.174985	0.00109473	0.173891	0.636174	0.170903	0.000444205	0.170459	0.608668	0.235441	0.000430776	0.23501	0.647145	0.212973	0.00013036	0.212843	0.636174	0.0305867	0.000218563	0.0303682	0.630683	0.0157686	3.79097e-05	0.0157307	0.603153	0.0599301	7.05496e-05	0.0598596	0.634344	0.0662423	7.79759e-06	0.0662345	0.603153	0.0692372	2.09775e-05	0.0692163	0.592105	0.0674985	7.71273e-06	0.0674908
0.619685	0.170286	0.00104182	0.169244	0.638004	0.16007	0.000420096	0.15965	0.610506	0.231955	0.000409926	0.231545	0.648971	0.213853	0.000121951	0.213731	0.638004	0.036148	0.00020689	0.0359411	0.632514	0.0144266	3.56869e-05	0.0143909	0.604992	0.0623155	6.6273e-05	0.0622492	0.636174	0.0693312	7.23392e-06	0.069324	0.604992	0.0689558	1.95255e-05	0.0689363	0.593948	0.0586009	7.16469e-06	0.0585937
0.621519	0.158952	0.000991484	0.157961	0.639833	0.149507	0.000397301	0.149109	0.612343	0.233027	0.000390091	0.232637	0.650798	0.207693	0.000114087	0.207579	0.639833	0.0219359	0.000195842	0.0217401	0.634344	0.00570353	3.35949e-05	0.00566994	0.606831	0.0551597	6.2257e-05	0.0550974	0.638004	0.0713906	6.71113e-06	0.0713839	0.606831	0.0607936	1.81744e-05	0.0607755	0.59579	0.0561464	6.65574e-06	0.0561397
0.623353	0.150935	0.000943591	0.149992	0.641662	0.136235	0.000375748	0.135859	0.614179	0.23115	0.000371221	0.230779	0.652623	0.203292	0.000106732	0.203186	0.641662	0.0318226	0.000185388	0.0316372	0.636174	0.0104006	3.1626e-05	0.0103689	0.608668	0.0644026	5.84855e-05	0.0643442	0.639833	0.0737932	6.22622e-06	0.0737869	0.608668	0.0669857	1.69173e-05	0.0669688	0.597632	0.0506238	6.1831e-06	0.0506176
0.625186	0.14513	0.000898024	0.144232	0.64349	0.132714	0.000355372	0.132359	0.616015	0.2341	0.000353269	0.233747	0.654449	0.188918	9.98528e-05	0.188818	0.64349	0.0207001	0.000175495	0.0205246	0.638004	0.00369051	2.97731e-05	0.00366074	0.610506	0.0644026	5.49434e-05	0.0643477	0.641662	0.0710474	5.77647e-06	0.0710416	0.610506	0.0554461	1.57473e-05	0.0554304	0.599473	0.061669	5.74416e-06	0.0616633
0.627019	0.136561	0.000854671	0.135706	0.645317	0.123506	0.000336105	0.123169	0.61785	0.233027	0.00033619	0.232691	0.656274	0.183051	9.34184e-05	0.182958	0.645317	0.0228628	0.000166132	0.0226967	0.639833	0.00503252	2.8029e-05	0.00500449	0.612343	0.0617192	5.16169e-05	0.0616676	0.64349	0.0792847	5.35936e-06	0.0792793	0.612343	0.0596679	1.46587e-05	0.0596532	0.601313	0.0598282	5.33651e-06	0.0598229
0.628851	0.128544	0.000813422	0.12773	0.647145	0.124047	0.000317886	0.123729	0.619685	0.2341	0.000319942	0.23378	0.658098	0.179824	8.74002e-05	0.179737	0.647145	0.0250255	0.00015727	0.0248682	0.641662	0.00637453	2.63876e-05	0.00634814	0.614179	0.0685769	4.84926e-05	0.0685284	0.645317	0.0741364	4.97246e-06	0.0741314	0.614179	0.0582606	1.36455e-05	0.058247	0.603153	0.0518511	4.95789e-06	0.0518462
0.630683	0.116933	0.000774172	0.116159	0.648971	0.111047	0.00030066	0.110746	0.621519	0.231418	0.000304483	0.231114	0.659922	0.16809	8.17712e-05	0.168008	0.648971	0.0173016	0.000148883	0.0171527	0.64349	0.00671003	2.48428e-05	0.00668519	0.616015	0.0590357	4.55584e-05	0.0589901	0.647145	0.072077	4.61355e-06	0.0720724	0.616015	0.0515058	1.27027e-05	0.051493	0.604992	0.0420332	4.60624e-06	0.0420285
0.632514	0.113893	0.00073683	0.113156	0.650798	0.106713	0.00028437	0.106429	0.623353	0.2282	0.000289776	0.227911	0.661745	0.16897	7.65056e-05	0.168894	0.650798	0.0188464	0.000140946	0.0187054	0.645317	0.0124136	2.33888e-05	0.0123902	0.61785	0.0670861	4.28024e-05	0.0670433	0.648971	0.0724202	4.28065e-06	0.0724159	0.61785	0.053476	1.18253e-05	0.0534642	0.606831	0.04234	4.27964e-06	0.0423357
0.634344	0.098412	0.000701297	0.0977107	0.652623	0.0899207	0.000268967	0.0896517	0.625186	0.218547	0.000275782	0.218271	0.663569	0.159876	7.15804e-05	0.159805	0.652623	0.0200822	0.000133433	0.0199488	0.647145	0.0201301	2.20202e-05	0.0201081	0.619685	0.0685769	4.0214e-05	0.0685367	0.650798	0.0772253	3.97182e-06	0.0772213	0.619685	0.0537574	1.10087e-05	0.0537464	0.608668	0.0466353	3.97629e-06	0.0466313
0.636174	0.0948183	0.000667486	0.0941508	0.654449	0.0839621	0.000254403	0.0837076	0.627019	0.212111	0.000262468	0.211849	0.665391	0.154009	6.69734e-05	0.153942	0.654449	0.0231718	0.000126323	0.0230454	0.648971	0.00972954	2.0732e-05	0.00970881	0.621519	0.0715585	3.77827e-05	0.0715207	0.652623	0.0737932	3.68536e-06	0.0737895	0.621519	0.0529131	1.02487e-05	0.0529028	0.610506	0.0441808	3.69451e-06	0.0441771
0.638004	0.0829315	0.000635314	0.0822962	0.656274	0.0839621	0.000240629	0.0837214	0.628851	0.217474	0.000249801	0.217224	0.667213	0.144329	6.26639e-05	0.144266	0.656274	0.0179195	0.000119593	0.0177999	0.650798	0.00671003	1.95195e-05	0.00669051	0.623353	0.0655952	3.5499e-05	0.0655597	0.654449	0.0700176	3.41962e-06	0.0700142	0.623353	0.0517872	9.54139e-06	0.0517777	0.612343	0.0469421	3.43279e-06	0.0469387
0.639833	0.0740855	0.000604699	0.0734808	0.658098	0.0725866	0.000227606	0.072359	0.630683	0.22391	0.000237747	0.223672	0.669035	0.139929	5.86326e-05	0.13987	0.658098	0.0200822	0.000113223	0.019969	0.652623	0.0137556	1.83781e-05	0.0137372	0.625186	0.0638063	3.3354e-05	0.0637729	0.656274	0.0634964	3.1731e-06	0.0634932	0.625186	0.0551646	8.88304e-06	0.0551558	0.614179	0.0414195	3.18967e-06	0.0414163
0.641662	0.0760206	0.000575567	0.075445	0.659922	0.0652737	0.00021529	0.0650584	0.632514	0.220424	0.000226279	0.220198	0.670857	0.130541	5.48613e-05	0.130486	0.659922	0.0234807	0.000107195	0.0233735	0.654449	0.0177816	1.73038e-05	0.0177643	0.627019	0.068875	3.13392e-05	0.0688437	0.658098	0.0641829	2.94441e-06	0.06418	0.627019	0.0622009	8.27032e-06	0.0621927	0.616015	0.048783	2.96384e-06	0.04878
0.64349	0.0685567	0.000547849	0.0680088	0.661745	0.0603985	0.000203642	0.0601949	0.634344	0.211307	0.000215367	0.211091	0.672678	0.130835	5.13336e-05	0.130783	0.661745	0.0154478	0.000101488	0.0153464	0.656274	0.0130846	1.62925e-05	0.0130683	0.628851	0.068875	2.94466e-05	0.0688456	0.659922	0.0631532	2.73226e-06	0.0631504	0.628851	0.0622009	7.7e-06	0.0621932	0.61785	0.0524647	2.75405e-06	0.052462
0.645317	0.0566699	0.000521472	0.0561484	0.663569	0.056065	0.000192628	0.0558724	0.636174	0.209966	0.000204984	0.209761	0.674498	0.121447	4.80333e-05	0.121399	0.663569	0.0207001	9.60861e-05	0.020604	0.658098	0.0157686	1.53405e-05	0.0157532	0.630683	0.0682787	2.76686e-05	0.068251	0.661745	0.0573184	2.53543e-06	0.0573158	0.630683	0.0655784	7.16913e-06	0.0655712	0.619685	0.0573737	2.55917e-06	0.0573712
0.647145	0.0527997	0.000496369	0.0523033	0.665391	0.0547108	0.000182212	0.0545286	0.638004	0.207284	0.000195104	0.207089	0.676318	0.115874	4.49459e-05	0.115829	0.665391	0.0256434	9.09734e-05	0.0255525	0.659922	0.0130846	1.44444e-05	0.0130701	0.632514	0.0715585	2.59987e-05	0.0715325	0.663569	0.058348	2.35282e-06	0.0583457	0.632514	0.0667042	6.67504e-06	0.0666975	0.621519	0.0607487	2.37813e-06	0.0607463
0.648971	0.04036	0.000472482	0.0398875	0.667213	0.0436061	0.000172362	0.0434337	0.639833	0.205139	0.000185702	0.204953	0.678138	0.104726	4.20575e-05	0.104684	0.667213	0.0210091	8.61337e-05	0.0209229	0.661745	0.0157686	1.36008e-05	0.015755	0.634344	0.0664898	2.44298e-05	0.0664653	0.665391	0.0531997	2.18341e-06	0.0531975	0.634344	0.0650154	6.2151e-06	0.0650092	0.623353	0.0576806	2.20995e-06	0.0576784
0.650798	0.0387014	0.000449749	0.0382516	0.669035	0.0465854	0.000163046	0.0464224	0.641662	0.201921	0.000176756	0.201744	0.679957	0.10326	3.93554e-05	0.10322	0.669035	0.0228628	8.15525e-05	0.0227813	0.663569	0.00637453	1.28067e-05	0.00636172	0.636174	0.0617192	2.29561e-05	0.0616962	0.667213	0.0590344	2.02623e-06	0.0590324	0.636174	0.0585421	5.78697e-06	0.0585363	0.625186	0.052158	2.05369e-06	0.0521559
0.652623	0.0356606	0.000428115	0.0352324	0.670857	0.0379184	0.000154235	0.0377641	0.64349	0.196558	0.000168244	0.19639	0.681776	0.0909388	3.68273e-05	0.090902	0.670857	0.0228628	7.72159e-05	0.0227856	0.665391	0.00469702	1.20591e-05	0.00468496	0.638004	0.0655952	2.15715e-05	0.0655736	0.669035	0.0566319	1.8804e-06	0.05663	0.638004	0.0602308	5.38843e-06	0.0602254	0.627019	0.0472489	1.90854e-06	0.047247
0.654449	0.0287496	0.000407528	0.028342	0.672678	0.0406268	0.000145903	0.0404809	0.645317	0.195217	0.000160143	0.195057	0.683595	0.0847784	3.44623e-05	0.084744	0.672678	0.0240986	7.31109e-05	0.0240255	0.667213	0.000335499	1.13554e-05	0.000324143	0.639833	0.0560541	2.02708e-05	0.0560338	0.670857	0.042903	1.74509e-06	0.0429012	0.639833	0.0562905	5.01742e-06	0.0562855	0.628851	0.0490898	1.77367e-06	0.049088
0.656274	0.0248795	0.000387935	0.0244915	0.674498	0.0384601	0.000138022	0.0383221	0.647145	0.193877	0.000152434	0.193724	0.685413	0.0759779	3.22494e-05	0.0759457	0.674498	0.0237897	6.92249e-05	0.0237204	0.669035	0.00972954	1.06928e-05	0.00971885	0.641662	0.0486001	1.90488e-05	0.0485811	0.672678	0.0415301	1.61955e-06	0.0415285	0.641662	0.059105	4.67204e-06	0.0591003	0.630683	0.0539988	1.64837e-06	0.0539971
0.658098	0.024603	0.000369289	0.0242337	0.676318	0.0371058	0.000130568	0.0369753	0.648971	0.190659	0.000145098	0.190514	0.687231	0.0686442	3.01791e-05	0.068614	0.676318	0.0173016	6.55463e-05	0.017236	0.670857	0.00771652	1.0069e-05	0.00770645	0.64349	0.0405498	1.7901e-05	0.0405319	0.674498	0.0387843	1.50306e-06	0.0387828	0.64349	0.056009	4.35056e-06	0.0560047	0.632514	0.0533852	1.53195e-06	0.0533836
0.659922	0.0251559	0.000351543	0.0248043	0.678138	0.033314	0.000123519	0.0331905	0.650798	0.187173	0.000138117	0.187035	0.689048	0.0627771	2.82422e-05	0.0627489	0.678138	0.0234807	6.20638e-05	0.0234187	0.672678	0.00872303	9.48181e-06	0.00871355	0.645317	0.0366737	1.68225e-05	0.0366569	0.676318	0.0425598	1.39498e-06	0.0425584	0.645317	0.0529131	4.05126e-06	0.052909	0.634344	0.0490898	1.42379e-06	0.0490884
0.661745	0.02018	0.000334654	0.0198454	0.679957	0.0254595	0.000116852	0.0253426	0.652623	0.176715	0.000131474	0.176583	0.690865	0.0530965	2.64299e-05	0.0530701	0.679957	0.0203911	5.87672e-05	0.0203324	0.674498	0.00570353	8.92892e-06	0.0056946	0.647145	0.0301142	1.58092e-05	0.0300984	0.678138	0.0360385	1.29469e-06	0.0360372	0.647145	0.0531945	3.77261e-06	0.0531908	0.636174	0.0411127	1.32328e-06	0.0411114
0.663569	0.0215622	0.00031858	0.0212436	0.681776	0.0211259	0.000110545	0.0210154	0.654449	0.170279	0.000125151	0.170154	0.692682	0.0548567	2.47342e-05	0.054832	0.681776	0.0200822	5.56462e-05	0.0200265	0.676318	0.0127491	8.40841e-06	0.0127407	0.648971	0.0354811	1.48572e-05	0.0354662	0.679957	0.0326063	1.20163e-06	0.0326051	0.648971	0.0548832	3.51319e-06	0.0548797	0.638004	0.0500102	1.2299e-06	0.050009
0.665391	0.0190742	0.000303282	0.018771	0.683595	0.0232927	0.000104581	0.0231881	0.656274	0.168938	0.000119134	0.168819	0.694498	0.0431226	2.31476e-05	0.0430995	0.683595	0.0179195	5.26918e-05	0.0178668	0.678138	0.0104006	7.91832e-06	0.0103926	0.650798	0.0268344	1.39627e-05	0.0268205	0.681776	0.0329495	1.11527e-06	0.0329484	0.650798	0.0447509	3.27167e-06	0.0447476	0.639833	0.0460217	1.14312e-06	0.0460206
0.667213	0.013269	0.000288722	0.0129803	0.685413	0.0241053	9.89393e-05	0.0240063	0.658098	0.166525	0.000113408	0.166411	0.696314	0.0396024	2.16631e-05	0.0395807	0.685413	0.0197732	4.98946e-05	0.0197234	0.679957	0.0114071	7.45692e-06	0.0113996	0.652623	0.0322013	1.31223e-05	0.0321882	0.683595	0.0442759	1.03514e-06	0.0442748	0.652623	0.0450324	3.0468e-06	0.0450293	0.641662	0.0506238	1.06249e-06	0.0506227
0.669035	0.00663452	0.000274863	0.00635966	0.687231	0.0235636	9.36031e-05	0.02347	0.659922	0.167061	0.000107958	0.166953	0.69813	0.0404825	2.0274e-05	0.0404622	0.687231	0.0163747	4.72465e-05	0.0163275	0.681776	0.0147621	7.02247e-06	0.014755	0.654449	0.0327976	1.23327e-05	0.0327853	0.685413	0.0353521	9.60784e-07	0.0353511	0.654449	0.0481283	2.83745e-06	0.0481255	0.64349	0.0509307	9.87574e-07	0.0509297
0.670857	0.0110575	0.000261673	0.0107959	0.689048	0.0213968	8.85558e-05	0.0213082	0.661745	0.16143	0.000102772	0.161327	0.699945	0.0372556	1.89743e-05	0.0372366	0.689048	0.0148299	4.47395e-05	0.0147852	0.683595	0.010736	6.61344e-06	0.0107294	0.656274	0.0259399	1.15907e-05	0.0259284	0.687231	0.0343224	8.9178e-07	0.0343215	0.656274	0.0461582	2.64253e-06	0.0461556	0.645317	0.0441808	9.17954e-07	0.0441799
0.672678	0.0105047	0.000249119	0.0102555	0.690865	0.0251886	8.37817e-05	0.0251049	0.663569	0.153653	9.78353e-05	0.153555	0.70176	0.0319753	1.77581e-05	0.0319575	0.690865	0.0151389	4.2366e-05	0.0150965	0.685413	0.00771652	6.2283e-06	0.0077103	0.658098	0.0184859	1.08936e-05	0.0184751	0.689048	0.0363817	8.27746e-07	0.0363809	0.658098	0.0447509	2.46104e-06	0.0447484	0.647145	0.0358969	8.53256e-07	0.0358961
0.674498	0.0102282	0.00023717	0.00999105	0.692682	0.0219385	7.92657e-05	0.0218592	0.665391	0.151776	9.31373e-05	0.151683	0.703574	0.0357888	1.66201e-05	0.0357722	0.692682	0.0169926	4.01188e-05	0.0169525	0.687231	0.00738103	5.86567e-06	0.00737516	0.659922	0.0259399	1.02386e-05	0.0259297	0.690865	0.0205934	7.68322e-07	0.0205927	0.659922	0.0444694	2.29206e-06	0.0444672	0.648971	0.0392718	7.93134e-07	0.039271
0.676318	0.0129926	0.000225796	0.0127668	0.694498	0.0224802	7.4994e-05	0.0224052	0.667213	0.139977	8.86659e-05	0.139889	0.705388	0.0346154	1.55552e-05	0.0345999	0.694498	0.0108135	3.79913e-05	0.0107755	0.689048	0.00972954	5.52422e-06	0.00972402	0.661745	0.0247473	9.62305e-06	0.0247377	0.692682	0.0147586	7.13173e-07	0.0147579	0.661745	0.0427808	2.13471e-06	0.0427787	0.650798	0.0380446	7.37259e-07	0.0380439
0.678138	0.0110575	0.00021497	0.0108426	0.696314	0.0211259	7.09534e-05	0.021055	0.669035	0.135687	8.44101e-05	0.135602	0.707202	0.0354955	1.45587e-05	0.0354809	0.696314	0.0129762	3.5977e-05	0.0129402	0.690865	0.00671003	5.20272e-06	0.00670483	0.663569	0.0202749	9.04467e-06	0.0202659	0.694498	0.0102967	6.61994e-07	0.010296	0.663569	0.0498171	1.9882e-06	0.0498151	0.652623	0.0392718	6.85335e-07	0.0392712
0.679957	0.0121633	0.000204666	0.0119586	0.69813	0.0170633	6.71311e-05	0.0169961	0.670857	0.128983	8.03594e-05	0.128903	0.709016	0.0264016	1.36263e-05	0.026388	0.69813	0.0179195	3.40698e-05	0.0178854	0.692682	0.0137556	4.89998e-06	0.0137507	0.665391	0.0199767	8.5012e-06	0.0199682	0.696314	0.0178476	6.14497e-07	0.017847	0.665391	0.0503799	1.85178e-06	0.0503781	0.654449	0.0319084	6.3708e-07	0.0319077
0.681776	0.0146512	0.000194857	0.0144564	0.699945	0.015709	6.35155e-05	0.0156455	0.672678	0.12791	7.65042e-05	0.127834	0.710829	0.0237614	1.27536e-05	0.0237487	0.699945	0.0163747	3.22641e-05	0.0163425	0.694498	0.00603903	4.61491e-06	0.00603442	0.667213	0.0202749	7.99049e-06	0.0202669	0.69813	0.0120128	5.70415e-07	0.0120123	0.667213	0.0467211	1.72475e-06	0.0467194	0.656274	0.0490898	5.92233e-07	0.0490892
0.683595	0.011334	0.00018552	0.0111485	0.70176	0.0148965	6.00952e-05	0.0148364	0.674498	0.125497	7.28344e-05	0.125424	0.712642	0.0228814	1.1937e-05	0.0228694	0.70176	0.0129762	3.05544e-05	0.0129456	0.696314	0.010065	4.34649e-06	0.0100607	0.669035	0.0232565	7.51057e-06	0.023249	0.699945	0.0102967	5.29504e-07	0.0102962	0.669035	0.0365888	1.60646e-06	0.0365872	0.658098	0.0503171	5.50553e-07	0.0503165
0.685413	0.00774027	0.000176633	0.00756364	0.703574	0.0151673	5.68597e-05	0.0151105	0.676318	0.118525	6.93417e-05	0.118455	0.714454	0.0184811	1.11729e-05	0.0184699	0.703574	0.0151389	2.89356e-05	0.0151099	0.69813	0.0177816	4.09371e-06	0.0177775	0.670857	0.0283252	7.05956e-06	0.0283182	0.70176	0.0164747	4.91534e-07	0.0164742	0.670857	0.0343372	1.4963e-06	0.0343357	0.659922	0.0401923	5.11817e-07	0.0401918
0.687231	0.00608164	0.000168173	0.00591347	0.705388	0.0111047	5.37989e-05	0.0110509	0.678138	0.102972	6.60169e-05	0.102906	0.716267	0.0205346	1.04578e-05	0.0205241	0.705388	0.0139031	2.74029e-05	0.0138756	0.699945	0.0144266	3.85569e-06	0.0144227	0.672678	0.0253436	6.63576e-06	0.025337	0.703574	0.00755092	4.56293e-07	0.00755046	0.672678	0.038559	1.39373e-06	0.0385576	0.661745	0.0340561	4.75812e-07	0.0340556
0.689048	0.0058052	0.00016012	0.00564508	0.707202	0.00758368	5.09036e-05	0.00753277	0.679957	0.0911729	6.28525e-05	0.0911101	0.718079	0.0205346	9.78848e-06	0.0205248	0.707202	0.0163747	2.59516e-05	0.0163488	0.70176	0.0124136	3.63155e-06	0.0124099	0.674498	0.0163988	6.23746e-06	0.0163926	0.705388	0.0151019	4.23585e-07	0.0151014	0.674498	0.0405291	1.2982e-06	0.0405278	0.663569	0.0269994	4.42349e-07	0.0269989
0.690865	0.0058052	0.000152454	0.00565275	0.709016	0.0113755	4.81644e-05	0.0113273	0.681776	0.0876869	5.98402e-05	0.0876271	0.71989	0.0170144	9.16217e-06	0.0170052	0.709016	0.0200822	2.45774e-05	0.0200576	0.703574	0.0161041	3.42048e-06	0.0161007	0.676318	0.0196786	5.86316e-06	0.0196727	0.707202	0.0130425	3.93227e-07	0.0130421	0.676318	0.0388404	1.20925e-06	0.0388392	0.665391	0.0291471	4.11248e-07	0.0291467
0.692682	0.00939891	0.000145157	0.00925375	0.710829	0.0102921	4.55731e-05	0.0102466	0.683595	0.0847372	5.6973e-05	0.0846802	0.721701	0.0149609	8.57602e-06	0.0149523	0.710829	0.0259524	2.32762e-05	0.0259291	0.705388	0.00369051	3.22171e-06	0.00368729	0.678138	0.0119264	5.51138e-06	0.0119209	0.709016	0.0144154	3.6505e-07	0.014415	0.678138	0.0332114	1.1264e-06	0.0332102	0.667213	0.0279198	3.82339e-07	0.0279195
0.694498	0.0105047	0.00013821	0.0103664	0.712642	0.012188	4.31216e-05	0.0121449	0.685413	0.0783015	5.42437e-05	0.0782473	0.723513	0.0143742	8.02746e-06	0.0143662	0.712642	0.0191553	2.20441e-05	0.0191333	0.707202	0.0254981	3.03453e-06	0.0254951	0.679957	0.0181878	5.1808e-06	0.0181826	0.710829	0.0223095	3.38896e-07	0.0223092	0.679957	0.0444694	1.04925e-06	0.0444684	0.669035	0.0245449	3.55468e-07	0.0245445
0.696314	0.00608164	0.000131597	0.00595005	0.714454	0.010563	4.08025e-05	0.0105222	0.687231	0.0667708	5.16456e-05	0.0667191	0.725323	0.0132008	7.51405e-06	0.0131933	0.714454	0.0114314	2.08775e-05	0.0114105	0.709016	0.0174461	2.85826e-06	0.0174432	0.681776	0.00954113	4.8701e-06	0.00953626	0.712642	0.016818	3.1462e-07	0.0168176	0.681776	0.0340557	9.7739e-07	0.0340547	0.670857	0.0208632	3.30491e-07	0.0208628
0.69813	0.00912247	0.000125302	0.00899716	0.716267	0.0116464	3.86085e-05	0.0116077	0.689048	0.0740109	4.91726e-05	0.0739618	0.727134	0.0164277	7.03357e-06	0.0164206	0.716267	0.00957766	1.97728e-05	0.00955789	0.710829	0.0194591	2.69225e-06	0.0194564	0.683595	0.0116283	4.5781e-06	0.0116237	0.714454	0.0147586	2.92087e-07	0.0147583	0.683595	0.0374332	9.10473e-07	0.0374322	0.672678	0.0266926	3.07275e-07	0.0266923
0.699945	0.0107811	0.000119308	0.0106618	0.718079	0.0135423	3.65326e-05	0.0135057	0.690865	0.0595306	4.68184e-05	0.0594838	0.728944	0.0111473	6.58389e-06	0.0111407	0.718079	0.0154478	1.87266e-05	0.0154291	0.712642	0.0285176	2.5359e-06	0.0285151	0.685413	0.0128209	4.30366e-06	0.0128166	0.716267	0.0205934	2.71172e-07	0.0205932	0.685413	0.0298339	8.48147e-07	0.0298331	0.674498	0.0251585	2.85694e-07	0.0251582
0.70176	0.0071874	0.000113603	0.00707379	0.71989	0.0138131	3.45688e-05	0.0137786	0.692682	0.0600669	4.45774e-05	0.0600223	0.730754	0.0170144	6.16301e-06	0.0170082	0.71989	0.0129762	1.7736e-05	0.0129585	0.714454	0.0171106	2.38867e-06	0.0171082	0.687231	0.00357793	4.04572e-06	0.00357389	0.718079	0.019907	2.51756e-07	0.0199067	0.687231	0.0326485	7.901e-07	0.0326477	0.676318	0.0236245	2.65633e-07	0.0236242
0.703574	0.0102282	0.000108172	0.01012	0.721701	0.0138131	3.27109e-05	0.0137804	0.694498	0.0490725	4.2444e-05	0.04903	0.732563	0.0173077	5.76909e-06	0.0173019	0.721701	0.0139031	1.6798e-05	0.0138863	0.716267	0.0258336	2.25001e-06	0.0258314	0.689048	0.0116283	3.8033e-06	0.0116244	0.71989	0.0116696	2.33734e-07	0.0116694	0.689048	0.0318041	7.36038e-07	0.0318034	0.678138	0.0187155	2.46984e-07	0.0187152
0.705388	0.0118868	0.000103001	0.0117838	0.723513	0.0127297	3.09531e-05	0.0126988	0.696314	0.053363	4.04132e-05	0.0533226	0.734373	0.0202412	5.40041e-06	0.0202358	0.723513	0.0219359	1.59097e-05	0.02192	0.718079	0.0204656	2.11941e-06	0.0204635	0.690865	0.00536689	3.57545e-06	0.00536332	0.721701	0	2.17005e-07	-2.17005e-07	0.690865	0.0337743	6.85685e-07	0.0337736	0.679957	0.0236245	2.29649e-07	0.0236242
0.707202	0.0124397	9.8078e-05	0.0123416	0.725323	0.010563	2.92899e-05	0.0105337	0.69813	0.0469272	3.84799e-05	0.0468887	0.736182	0.015841	5.05533e-06	0.0158359	0.725323	0.0191553	1.50685e-05	0.0191403	0.71989	0.0234851	1.99642e-06	0.0234831	0.692682	0.00834849	3.36128e-06	0.00834513	0.723513	0.00240256	2.01476e-07	0.00240236	0.692682	0.0349001	6.38785e-07	0.0348994	0.681776	0.0159542	2.13533e-07	0.015954
0.709016	0.0102282	9.33913e-05	0.0101348	0.727134	0.010563	2.77164e-05	0.0105353	0.699945	0.0450501	3.66394e-05	0.0450135	0.73799	0.0202412	4.73235e-06	0.0202365	0.727134	0.0185374	1.42719e-05	0.0185231	0.721701	0.0224786	1.88059e-06	0.0224767	0.694498	0.0128209	3.15999e-06	0.0128177	0.725323	0.00171611	1.8706e-07	0.00171593	0.694498	0.0320856	5.95101e-07	0.032085	0.683595	0.0251585	1.98552e-07	0.0251583
0.710829	0.0058052	8.89293e-05	0.00571628	0.728944	0.00812537	2.62277e-05	0.00809914	0.70176	0.0418323	3.48873e-05	0.0417974	0.739799	0.0199479	4.43005e-06	0.0199434	0.728944	0.00741496	1.35176e-05	0.00740144	0.723513	0.0251626	1.77149e-06	0.0251608	0.696314	0.00745401	2.97079e-06	0.00745104	0.727134	0.0102967	1.73678e-07	0.0102965	0.696314	0.0326485	5.54414e-07	0.0326479	0.685413	0.0285335	1.84624e-07	0.0285333
0.712642	0.0071874	8.46812e-05	0.00710272	0.730754	0.0138131	2.48191e-05	0.0137883	0.703574	0.0439775	3.32193e-05	0.0439443	0.741607	0.0208279	4.14711e-06	0.0208238	0.730754	0.0132851	1.28032e-05	0.0132723	0.725323	0.0137556	1.66873e-06	0.0137539	0.69813	0.00417425	2.79295e-06	0.00417146	0.728944	0.0072077	1.61255e-07	0.00720754	0.69813	0.0278638	5.16514e-07	0.0278633	0.687231	0.0156474	1.71676e-07	0.0156472
0.714454	0.00608164	8.06369e-05	0.00600101	0.732563	0.0167924	2.34864e-05	0.0167689	0.705388	0.0335195	3.16313e-05	0.0334878	0.743415	0.0143742	3.88227e-06	0.0143703	0.732563	0.0151389	1.21266e-05	0.0151268	0.727134	0.0161041	1.57196e-06	0.0161025	0.699945	0.0113301	2.62579e-06	0.0113275	0.730754	0.00446191	1.49722e-07	0.00446176	0.699945	0.0289896	4.81213e-07	0.0289891	0.689048	0.0196359	1.59639e-07	0.0196358
0.716267	0.00691096	7.67863e-05	0.00683417	0.734373	0.00514607	2.22255e-05	0.00512384	0.707202	0.0246703	3.01196e-05	0.0246402	0.745223	0.0193612	3.63437e-06	0.0193575	0.734373	0.014521	1.1486e-05	0.0145095	0.728944	0.00201301	1.48081e-06	0.00201152	0.70176	0.0205731	2.46866e-06	0.0205706	0.732563	0.0192205	1.39016e-07	0.0192204	0.70176	0.0337743	4.4833e-07	0.0337738	0.690865	0.0144201	1.48448e-07	0.01442
0.718079	0.00746384	7.312e-05	0.00739072	0.736182	0.0135423	2.10323e-05	0.0135212	0.709016	0.0262793	2.86803e-05	0.0262506	0.747031	0.0190678	3.40233e-06	0.0190644	0.736182	0.0166837	1.08792e-05	0.0166728	0.730754	0.00738103	1.39495e-06	0.00737963	0.703574	0.0128209	2.32096e-06	0.0128186	0.734373	0.0178476	1.29077e-07	0.0178475	0.703574	0.0242049	4.177e-07	0.0242045	0.692682	0.0165678	1.38043e-07	0.0165677
0.71989	0.00746384	6.96296e-05	0.00739421	0.73799	0.010563	1.99034e-05	0.0105431	0.710829	0.0142123	2.731e-05	0.0141849	0.748838	0.0149609	3.18514e-06	0.0149577	0.73799	0.0148299	1.03046e-05	0.0148196	0.732563	0.00704554	1.31409e-06	0.00704423	0.705388	0.0140135	2.18212e-06	0.0140113	0.736182	0.0120128	1.19849e-07	0.0120127	0.705388	0.0256122	3.89168e-07	0.0256118	0.694498	0.0196359	1.2837e-07	0.0196358
0.721701	0.00884603	6.63063e-05	0.00877972	0.739799	0.00920875	1.88353e-05	0.00918991	0.712642	0.0222569	2.60055e-05	0.0222309	0.750645	0.0143742	2.98184e-06	0.0143712	0.739799	0.00339853	9.7604e-06	0.00338877	0.734373	0.0124136	1.23793e-06	0.0124123	0.707202	0.0181878	2.05162e-06	0.0181857	0.73799	0.0140722	1.11282e-07	0.0140721	0.707202	0.0261751	3.6259e-07	0.0261747	0.696314	0.0171814	1.19376e-07	0.0171813
0.723513	0.00801671	6.31421e-05	0.00795357	0.741607	0.00460438	1.78247e-05	0.00458655	0.714454	0.0246703	2.47634e-05	0.0246456	0.752452	0.0132008	2.79153e-06	0.013198	0.741607	0.00370747	9.24504e-06	0.00369823	0.736182	0.0241561	1.16618e-06	0.0241549	0.709016	0.0104356	1.92894e-06	0.0104337	0.739799	0.0133857	1.0333e-07	0.0133856	0.709016	0.0284267	3.37831e-07	0.0284263	0.69813	0.0181019	1.11014e-07	0.0181018
0.725323	0.00525233	6.01292e-05	0.0051922	0.743415	0.00785452	1.68684e-05	0.00783765	0.716267	0.0209161	2.3581e-05	0.0208926	0.754258	0.0102673	2.6134e-06	0.0102647	0.743415	0.00401643	8.75694e-06	0.00400767	0.73799	0.0254981	1.09861e-06	0.025497	0.710829	0.00357793	1.81361e-06	0.00357612	0.741607	0.0212799	9.59462e-08	0.0212798	0.710829	0.0216718	3.14766e-07	0.0216715	0.699945	0.00613622	1.03239e-07	0.00613611
0.727134	0.00884603	5.72607e-05	0.00878877	0.745223	0.0127297	1.59634e-05	0.0127138	0.718079	0.0185027	2.2455e-05	0.0184803	0.756065	0.016721	2.44665e-06	0.0167186	0.745223	0.00556122	8.29467e-06	0.00555293	0.739799	0.0127491	1.03496e-06	0.012748	0.712642	0.00983929	1.7052e-06	0.00983758	0.743415	0.0164747	8.90911e-08	0.0164746	0.712642	0.0250493	2.9328e-07	0.025049	0.70176	0.0144201	9.60099e-08	0.01442
0.728944	0.00829315	5.45295e-05	0.00823862	0.747031	0.0100213	1.51072e-05	0.0100062	0.71989	0.0115307	2.13831e-05	0.0115093	0.757871	0.0134942	2.29056e-06	0.0134919	0.747031	0.00432539	7.85687e-06	0.00431753	0.741607	0.0191236	9.75013e-07	0.0191226	0.714454	0.0119264	1.60329e-06	0.0119248	0.745223	0.0212799	8.27265e-08	0.0212798	0.714454	0.0188573	2.73264e-07	0.018857	0.703574	0.00797709	8.92884e-08	0.007977
0.730754	0.00469945	5.19289e-05	0.00464752	0.748838	0.0116464	1.4297e-05	0.0116321	0.721701	0.00750836	2.03625e-05	0.007488	0.759677	0.0143742	2.14444e-06	0.0143721	0.748838	0.00803287	7.44222e-06	0.00802543	0.743415	0.00972954	9.18541e-07	0.00972863	0.716267	0.00655953	1.50749e-06	0.00655802	0.747031	0.0302037	7.68175e-08	0.0302036	0.716267	0.0188573	2.54618e-07	0.0188571	0.705388	0.00859071	8.30384e-08	0.00859062
0.732563	0.00525233	4.94527e-05	0.00520288	0.750645	0.00839621	1.35304e-05	0.00838268	0.723513	0.00536312	1.93908e-05	0.00534373	0.761482	0.0161343	2.00765e-06	0.0161323	0.750645	0.00772392	7.04952e-06	0.00771687	0.745223	0.0110715	8.65346e-07	0.0110707	0.718079	0.00268345	1.41742e-06	0.00268203	0.748838	0.0236824	7.13311e-08	0.0236824	0.718079	0.0101323	2.37246e-07	0.0101321	0.707202	0.00521579	7.72272e-08	0.00521571
0.734373	0.00414657	4.70949e-05	0.00409948	0.752452	0.0100213	1.28049e-05	0.0100085	0.725323	0.00482681	1.84656e-05	0.00480834	0.763288	0.0152542	1.87962e-06	0.0152524	0.752452	0.00617914	6.67758e-06	0.00617246	0.747031	0.0104006	8.15239e-07	0.0103997	0.71989	0.0119264	1.33275e-06	0.0119251	0.750645	0.0185341	6.62374e-08	0.018534	0.71989	0.0137912	2.21062e-07	0.0137909	0.709016	0.00521579	7.18235e-08	0.00521572
0.736182	0.00442301	4.48498e-05	0.00437816	0.754258	0.0146257	1.21184e-05	0.0146135	0.727134	0.00643575	1.75847e-05	0.00641816	0.765093	0.0134942	1.75975e-06	0.0134924	0.754258	0.0108135	6.3253e-06	0.0108072	0.748838	0.0201301	7.68039e-07	0.0201293	0.721701	0.0137154	1.25315e-06	0.0137141	0.752452	0.019907	6.1508e-08	0.0199069	0.721701	0.0171686	2.05985e-07	0.0171684	0.710829	0.0138065	6.67987e-08	0.0138064
0.73799	0.00221151	4.27121e-05	0.0021688	0.756065	0.0154382	1.14689e-05	0.0154267	0.728944	0.0067039	1.67459e-05	0.00668716	0.766898	0.00557366	1.64755e-06	0.00557201	0.756065	0.0135941	5.99166e-06	0.0135881	0.750645	0.010065	7.23579e-07	0.0100643	0.723513	0.0152062	1.17831e-06	0.015205	0.754258	0.0106399	5.71167e-08	0.0106399	0.723513	0.0121025	1.91938e-07	0.0121023	0.712642	0.0107384	6.21262e-08	0.0107383
0.739799	0.00691096	4.06766e-05	0.00687028	0.757871	0.0159799	1.08541e-05	0.015969	0.730754	0.0112625	1.59473e-05	0.0112466	0.768703	0.00821383	1.54251e-06	0.00821228	0.757871	0.00988662	5.67563e-06	0.00988095	0.752452	0.010736	6.81697e-07	0.0107354	0.725323	0.0152062	1.10795e-06	0.0152051	0.756065	0.0113264	5.30396e-08	0.0113263	0.725323	0.0163242	1.78851e-07	0.0163241	0.714454	0.0141133	5.77814e-08	0.0141133
0.741607	0.00442301	3.87384e-05	0.00438428	0.759677	0.00975044	1.02725e-05	0.00974016	0.732563	0.00402234	1.51868e-05	0.00400715	0.770508	0.0105606	1.44417e-06	0.0105592	0.759677	0.0117404	5.37633e-06	0.011735	0.754258	0.010736	6.42243e-07	0.0107354	0.727134	0.0169951	1.04181e-06	0.0169941	0.757871	0.0175044	4.92537e-08	0.0175044	0.727134	0.0168871	1.66659e-07	0.016887	0.716267	0.00582941	5.37412e-08	0.00582935
0.743415	0.00912247	3.68927e-05	0.00908557	0.761482	0.0089379	9.72199e-06	0.00892818	0.734373	0.015553	1.44628e-05	0.0155386	0.772312	0.0137875	1.35211e-06	0.0137861	0.761482	0.0169926	5.09282e-06	0.0169875	0.756065	0.00637453	6.05079e-07	0.00637392	0.728944	0.00864666	9.79629e-07	0.00864568	0.759677	0.0161315	4.57386e-08	0.0161315	0.728944	0.0115395	1.55299e-07	0.0115394	0.718079	0.00674985	4.99838e-08	0.0067498
0.745223	0.00552877	3.51352e-05	0.00549363	0.763288	0.00839621	9.20112e-06	0.00838701	0.736182	0.000536318	1.37733e-05	0.000522545	0.774117	0.0111473	1.26593e-06	0.0111461	0.763288	0.0129762	4.82432e-06	0.0129714	0.757871	0.0150976	5.70068e-07	0.015097	0.730754	0.0122246	9.21163e-07	0.0122237	0.761482	0.016818	4.24745e-08	0.0168179	0.730754	0.023642	1.44715e-07	0.0236418	0.71989	0	4.64899e-08	-4.64899e-08
0.747031	0.0058052	3.34617e-05	0.00577174	0.765093	0.00812537	8.70816e-06	0.00811666	0.73799	0.00563127	1.31168e-05	0.00561816	0.775921	0.0102673	1.18525e-06	0.0102661	0.765093	0.00741496	4.56997e-06	0.00741039	0.759677	0.0140911	5.37087e-07	0.0140905	0.732563	0.014908	8.66196e-07	0.0149071	0.763288	0.0178476	3.9444e-08	0.0178476	0.732563	0.0180129	1.34854e-07	0.0180128	0.721701	0.00767028	4.32408e-08	0.00767024
0.748838	0.00691096	3.18681e-05	0.00687909	0.766898	0.014084	8.24169e-06	0.0140757	0.739799	0.00536312	1.24917e-05	0.00535063	0.777725	0.0134942	1.10972e-06	0.013493	0.766898	0.0179195	4.32908e-06	0.0179152	0.761482	0.0167751	5.06016e-07	0.0167746	0.734373	0.0184859	8.14516e-07	0.0184851	0.765093	0.0144154	3.66298e-08	0.0144154	0.734373	0.0135097	1.25666e-07	0.0135096	0.723513	0.00920434	4.02192e-08	0.0092043
0.750645	0.00939891	3.03506e-05	0.00936855	0.768703	0.012188	7.80025e-06	0.0121802	0.741607	0.00643575	1.18965e-05	0.00642385	0.779529	0.0149609	1.03901e-06	0.0149599	0.768703	0.00926871	4.1009e-06	0.00926461	0.763288	0.0167751	4.76749e-07	0.0167746	0.736182	0.0146099	7.65926e-07	0.0146091	0.766898	0.0185341	3.40167e-08	0.018534	0.736182	0.0157613	1.17105e-07	0.0157612	0.725323	0.00889752	3.7409e-08	0.00889748
0.752452	0.00663452	2.89055e-05	0.00660562	0.770508	0.0089379	7.38248e-06	0.00893052	0.743415	0.0144804	1.13297e-05	0.0144691	0.781333	0.0137875	9.72808e-07	0.0137865	0.770508	0.0129762	3.88477e-06	0.0129723	0.765093	0.0167751	4.49175e-07	0.0167746	0.73799	0.0101375	7.20241e-07	0.0101367	0.768703	0.0161315	3.15903e-08	0.0161315	0.73799	0.0146355	1.09129e-07	0.0146354	0.727134	0.00859071	3.47958e-08	0.00859067
0.754258	0.00691096	2.75294e-05	0.00688343	0.772312	0.0089379	6.98714e-06	0.00893091	0.745223	0.00884914	1.079e-05	0.00883835	0.783136	0.0137875	9.10832e-07	0.0137866	0.772312	0.00865079	3.68006e-06	0.00864711	0.766898	0.00536802	4.232e-07	0.0053676	0.739799	0.00596321	6.77288e-07	0.00596253	0.770508	0.0171612	2.93371e-08	0.0171612	0.739799	0.00956938	1.01697e-07	0.00956928	0.728944	0.0082839	3.23655e-08	0.00828387
0.756065	0.00856959	2.6219e-05	0.00854337	0.774117	0.0111047	6.613e-06	0.0110981	0.747031	0.00321787	1.0276e-05	0.0032076	0.78494	0.00938723	8.52808e-07	0.00938638	0.774117	0.0064881	3.48614e-06	0.00648461	0.768703	0	3.98729e-07	-3.98729e-07	0.741607	0.0113301	6.36904e-07	0.0113295	0.772312	0.0109832	2.7245e-08	0.0109831	0.741607	0.0135097	9.47726e-08	0.0135096	0.730754	0.0236245	3.01051e-08	0.0236244
0.757871	0.0071874	2.4971e-05	0.00716243	0.775921	0.0108338	6.25893e-06	0.0108276	0.748838	0.00724021	9.78663e-06	0.00723042	0.786743	0.00880053	7.98486e-07	0.00879973	0.775921	0.00247165	3.30247e-06	0.00246835	0.770508	0.00536802	3.75675e-07	0.00536764	0.743415	0.0184859	5.98931e-07	0.0184853	0.774117	0.016818	2.53022e-08	0.0168179	0.743415	0.01745	8.83202e-08	0.01745	0.732563	0.0202495	2.8003e-08	0.0202495
0.759677	0.00276439	2.37827e-05	0.0027406	0.777725	0.0108338	5.92384e-06	0.0108279	0.750645	0.00589943	9.32061e-06	0.00589011	0.788546	0.0120274	7.47627e-07	0.0120266	0.777725	0.0126672	3.12848e-06	0.0126641	0.772312	0.00771652	3.53957e-07	0.00771617	0.745223	0.0238528	5.63226e-07	0.0238523	0.775921	0.0192205	2.3498e-08	0.0192205	0.745223	0.0185759	8.23077e-08	0.0185758	0.734373	0.0156474	2.6048e-08	0.0156474
0.761482	0.00552877	2.26509e-05	0.00550611	0.779529	0.0124589	5.60674e-06	0.0124533	0.752452	0.0067039	8.87683e-06	0.00669502	0.790349	0.0132008	7.00013e-07	0.0132001	0.779529	0.00679705	2.96368e-06	0.00679409	0.774117	0.00939405	3.33496e-07	0.00939371	0.747031	0.0169951	5.29655e-07	0.0169946	0.777725	0.0250553	2.18227e-08	0.0250553	0.747031	0.0121025	7.67054e-08	0.0121024	0.736182	0.00797709	2.42296e-08	0.00797706
0.763288	0.0058052	2.15733e-05	0.00578363	0.781333	0.0102921	5.30662e-06	0.0102868	0.754258	0.00482681	8.45422e-06	0.00481836	0.792152	0.0123207	6.55433e-07	0.0123201	0.781333	0.00834183	2.80758e-06	0.00833902	0.775921	0.00436151	3.1422e-07	0.0043612	0.748838	0.0232565	4.98089e-07	0.023256	0.779529	0.0161315	2.0267e-08	0.0161315	0.748838	0.00647341	7.1485e-08	0.00647333	0.73799	0.00767028	2.25385e-08	0.00767026
0.765093	0.00691096	2.05469e-05	0.00689041	0.783136	0.0113755	5.02261e-06	0.0113705	0.756065	0.00241341	8.0518e-06	0.00240536	0.793954	0.0126141	6.13695e-07	0.0126135	0.783136	0.0129762	2.65971e-06	0.0129735	0.777725	0.00436151	2.96058e-07	0.00436121	0.750645	0.0152062	4.68408e-07	0.0152057	0.781333	0.0274579	1.88223e-08	0.0274579	0.750645	0.0143541	6.66206e-08	0.014354	0.739799	0.00674985	2.09656e-08	0.00674983
0.766898	0.00884603	1.95695e-05	0.00882646	0.78494	0.00812537	4.7538e-06	0.00812061	0.757871	0.0117988	7.66856e-06	0.0117912	0.795757	0.0114407	5.74619e-07	0.0114401	0.78494	0.0185374	2.51964e-06	0.0185349	0.779529	0.00469702	2.7895e-07	0.00469674	0.752452	0.0152062	4.40499e-07	0.0152057	0.783136	0.0209367	1.74807e-08	0.0209366	0.752452	0.011821	6.20878e-08	0.0118209	0.741607	0.00920434	1.95028e-08	0.00920432
0.768703	0.00939891	1.86387e-05	0.00938027	0.786743	0.00541691	4.49942e-06	0.00541241	0.759677	0.00536312	7.30361e-06	0.00535582	0.797559	0.00792047	5.38033e-07	0.00791993	0.786743	0.0166837	2.38696e-06	0.0166813	0.781333	0.00301952	2.6283e-07	0.00301925	0.754258	0.00983929	4.14256e-07	0.00983888	0.78494	0.0240257	1.62348e-08	0.0240256	0.754258	0	5.78638e-08	-5.78638e-08	0.743415	0.00859071	1.81421e-08	0.00859069
0.770508	0.00276439	1.77522e-05	0.00274664	0.788546	0.00866706	4.25865e-06	0.0086628	0.761482	0.00402234	6.95606e-06	0.00401538	0.799361	0	5.03778e-07	-5.03778e-07	0.788546	0.0151389	2.26127e-06	0.0151366	0.783136	0.010065	2.47644e-07	0.0100648	0.756065	0.00983929	3.8958e-07	0.0098389	0.786743	0.0233392	1.50779e-08	0.0233392	0.756065	0.00337743	5.39278e-08	0.00337738	0.745223	0.00460217	1.68765e-08	0.00460215
0.772312	0.00276439	1.6908e-05	0.00274748	0.790349	0.00758368	4.0308e-06	0.00757965	0.763288	0.000268155	6.62511e-06	0.00026153	0.801164	0.00557366	4.71707e-07	0.00557319	0.790349	0.0135941	2.14221e-06	0.013592	0.78494	0.00637453	2.33336e-07	0.0063743	0.757871	0.00894482	3.66376e-07	0.00894445	0.788546	0.0202502	1.40034e-08	0.0202502	0.757871	0.00394033	5.02597e-08	0.00394028	0.747031	0.0101248	1.56994e-08	0.0101248
0.774117	0.00608164	1.6104e-05	0.00606554	0.792152	0.00785452	3.81515e-06	0.0078507	0.765093	0.000804473	6.30991e-06	0.000798163	0.802966	0.00938723	4.41678e-07	0.00938679	0.792152	0.0114314	2.02943e-06	0.0114294	0.786743	0.0104006	2.19857e-07	0.0104003	0.759677	0.0137154	3.44557e-07	0.013715	0.790349	0.0154451	1.30056e-08	0.0154451	0.759677	0.00309597	4.68417e-08	0.00309593	0.748838	0.00736347	1.46045e-08	0.00736346
0.775921	0.00304082	1.53383e-05	0.00302548	0.793954	0.003521	3.61104e-06	0.00351738	0.766898	0	6.00975e-06	-6.00975e-06	0.804768	0.00704042	4.13563e-07	0.00704001	0.793954	0.0120493	1.92259e-06	0.0120474	0.788546	0.0110715	2.07156e-07	0.0110713	0.761482	0.00655953	3.24038e-07	0.0065592	0.792152	0.0209367	1.2079e-08	0.0209366	0.761482	0.0101323	4.36563e-08	0.0101322	0.750645	0.00490898	1.35862e-08	0.00490897
0.777725	0.00276439	1.46091e-05	0.00274978	0.795757	0.00704198	3.41788e-06	0.00703857	0.768703	0.00429049	5.7239e-06	0.00428477	0.80657	0.00821383	3.8724e-07	0.00821344	0.795757	0.0049433	1.82139e-06	0.00494148	0.790349	0.010736	1.95191e-07	0.0107358	0.763288	0.0131191	3.04746e-07	0.0131187	0.793954	0.0185341	1.12184e-08	0.0185341	0.763288	0.0106952	4.06882e-08	0.0106951	0.752452	0.0134997	1.26389e-08	0.0134997
0.779529	0.00497589	1.39146e-05	0.00496198	0.797559	0	3.23506e-06	-3.23506e-06	0.770508	0.00750836	5.45167e-06	0.00750291	0.808371	0.00410691	3.62593e-07	0.00410655	0.797559	0	1.72552e-06	-1.72552e-06	0.792152	0.0174461	1.83917e-07	0.0174459	0.765093	0.0116283	2.86602e-07	0.011628	0.795757	0.0120128	1.04192e-08	0.0120128	0.765093	0.00928793	3.79218e-08	0.00928789	0.754258	0.00736347	1.17578e-08	0.00736346
0.781333	0.00635808	1.32532e-05	0.00634483	0.799361	0.00460438	3.06203e-06	0.00460132	0.772312	0.0104581	5.19242e-06	0.0104529	0.810173	0.00968058	3.39515e-07	0.00968024	0.799361	0.007106	1.6347e-06	0.00710436	0.793954	0.0167751	1.73295e-07	0.0167749	0.766898	0.00119264	2.69541e-07	0.00119238	0.797559	0.019907	9.67703e-09	0.019907	0.766898	0.00759922	3.5344e-08	0.00759918	0.756065	0.0116588	1.09382e-08	0.0116588
0.783136	0.00469945	1.26233e-05	0.00468683	0.801164	0.00541691	2.89827e-06	0.00541401	0.774117	0.00241341	4.94552e-06	0.00240846	0.811975	0.00821383	3.17908e-07	0.00821351	0.801164	0.00741496	1.54867e-06	0.00741341	0.795757	0.0130846	1.63288e-07	0.0130844	0.768703	0	2.53498e-07	-2.53498e-07	0.799361	0.0205934	8.98774e-09	0.0205934	0.768703	0.00309597	3.29416e-08	0.00309594	0.757871	0.00705666	1.01758e-08	0.00705665
0.78494	0.00635808	1.20234e-05	0.00634606	0.802966	0.00622945	2.74327e-06	0.00622671	0.775921	0.00134078	4.71038e-06	0.00133607	0.813776	0.00645372	2.97676e-07	0.00645342	0.802966	0.00556122	1.46717e-06	0.00555975	0.797559	0.0181171	1.53859e-07	0.0181169	0.770508	0.00536689	2.3841e-07	0.00536666	0.801164	0.0178476	8.34761e-09	0.0178476	0.770508	0.00591049	3.07027e-08	0.00591046	0.759677	0.00797709	9.46669e-09	0.00797708
0.786743	0.0058052	1.14521e-05	0.00579375	0.804768	0.00270846	2.59656e-06	0.00270586	0.777725	0.00536312	4.48643e-06	0.00535863					0.804768	0.0123583	1.38996e-06	0.0123569	0.799361	0.0161041	1.44975e-07	0.0161039	0.772312	0.00447241	2.24222e-07	0.00447218	0.802966	0.0195638	7.75307e-09	0.0195638	0.772312	0.0163242	2.86162e-08	0.0163242	0.761482	0.0138065	8.80701e-09	0.0138065
0.788546	0.00525233	1.09079e-05	0.00524142	0.80657	0.0065003	2.45772e-06	0.00649784	0.779529	0.00643575	4.27316e-06	0.00643147					0.80657	0.0234807	1.31682e-06	0.0234794	0.801164	0.00167751	1.36604e-07	0.00167737	0.774117	0.00864666	2.1088e-07	0.00864645	0.804768	0.00446191	7.2009e-09	0.0044619	0.774117	0.0137912	2.66717e-08	0.0137911	0.763288	0.0184087	8.19342e-09	0.0184087
0.790349	0.0116104	1.03896e-05	0.0116	0.808371	0.00541691	2.32631e-06	0.00541459	0.781333	0.0101899	4.07005e-06	0.0101858					0.808371	0.014212	1.24753e-06	0.0142108	0.802966	0.0174461	1.28717e-07	0.017446	0.775921	0.014908	1.98333e-07	0.0149078	0.80657	0.0120128	6.68812e-09	0.0120128	0.775921	0.00985083	2.48595e-08	0.0098508	0.765093	0.0248517	7.62259e-09	0.0248517
0.792152	0.00442301	9.89601e-06	0.00441312	0.810173	0.00487523	2.20192e-06	0.00487302	0.783136	0.00589943	3.87661e-06	0.00589555					0.810173	0.0185374	1.18189e-06	0.0185362	0.804768	0.0167751	1.21286e-07	0.0167749	0.777725	0.0158025	1.86533e-07	0.0158023	0.808371	0.0085806	6.21188e-09	0.00858059	0.777725	0.00759922	2.31705e-08	0.00759919	0.766898	0.0230109	7.0916e-09	0.0230108
0.793954	0.00331726	9.42588e-06	0.00330784	0.811975	0.003521	2.08419e-06	0.00351891	0.78494	0.0109944	3.69237e-06	0.0109907					0.811975	0.0148299	1.11971e-06	0.0148288	0.80657	0.0104006	1.14285e-07	0.0104004	0.779529	0.0163988	1.75436e-07	0.0163986	0.810173	0.0109832	5.76955e-09	0.0109832	0.779529	0.0109766	2.15965e-08	0.0109766	0.768703	0.0174882	6.59766e-09	0.0174882
0.795757	0.00138219	8.97813e-06	0.00137321	0.813776	0.00460438	1.97276e-06	0.00460241	0.786743	0.00643575	3.51691e-06	0.00643223					0.813776	0.0188464	1.0608e-06	0.0188453	0.808371	0.0177816	1.07688e-07	0.0177815	0.781333	0.0193804	1.65001e-07	0.0193803	0.811975	0.0164747	5.35873e-09	0.0164747	0.781333	0.00900648	2.01295e-08	0.00900646	0.770508	0.0214768	6.13815e-09	0.0214768
0.797559	0.00552877	8.55167e-06	0.00552021	0.815577	0.00487523	1.8673e-06	0.00487336	0.788546	0.00482681	3.34979e-06	0.00482346					0.815577	0.0120493	1.005e-06	0.0120483	0.810173	0.0104006	1.01472e-07	0.0104005	0.783136	0.0110319	1.55187e-07	0.0110318	0.813776	0.0151019	4.97719e-09	0.0151018	0.783136	0.00591049	1.87623e-08	0.00591048	0.772312	0.0196359	5.71071e-09	0.0196359
0.799361	0.00276439	8.14549e-06	0.00275624	0.817379	0.00785452	1.76748e-06	0.00785275	0.790349	0.00589943	3.19063e-06	0.00589624					0.817379	0.0210091	9.52129e-07	0.0210081	0.811975	0.0164396	9.5615e-08	0.0164395	0.78494	0.0175915	1.45958e-07	0.0175913	0.815577	0.0147586	4.62286e-09	0.0147586	0.78494	0.00759922	1.7488e-08	0.0075992	0.774117	0.0107384	5.31306e-09	0.0107384
0.801164	0.00552877	7.75864e-06	0.00552101	0.81918	0.00433353	1.673e-06	0.00433186	0.792152	0.00884914	3.03905e-06	0.0088461					0.81918	0.0154478	9.02042e-07	0.0154469	0.813776	0.00704554	9.00964e-08	0.00704545	0.786743	0.0196786	1.37278e-07	0.0196784	0.817379	0.00514836	4.29375e-09	0.00514835	0.786743	0.0143541	1.63004e-08	0.014354	0.775921	0.0144201	4.94313e-09	0.0144201
0.802966	0.00746384	7.39017e-06	0.00745645	0.820981	0.00758368	1.58357e-06	0.00758209	0.793954	0.0131396	2.89467e-06	0.0131367					0.820981	0.0114314	8.54596e-07	0.0114305	0.815577	0.00805204	8.48969e-08	0.00805195	0.788546	0.0172933	1.29115e-07	0.0172932	0.81918	0.00892381	3.98807e-09	0.00892381	0.788546	0.0129468	1.51936e-08	0.0129468	0.777725	0.00981796	4.59898e-09	0.00981796
0.804768	0.00663452	7.03922e-06	0.00662748	0.822782	0.00162508	1.49892e-06	0.00162358	0.795757	0.0109944	2.75717e-06	0.0109916					0.822782	0.00587018	8.09642e-07	0.00586937	0.817379	0.0110715	7.99974e-08	0.0110715	0.790349	0.0172933	1.21438e-07	0.0172932	0.820981	0.013729	3.70418e-09	0.0137289	0.790349	0.00956938	1.41619e-08	0.00956936	0.779529	0.00644303	4.27885e-09	0.00644302
0.80657	0.00967534	6.70496e-06	0.00966863	0.824583	0.000270855	1.41881e-06	0.000269437	0.797559	0.00777652	2.6262e-06	0.00777389					0.824583	0.0148299	7.67058e-07	0.0148292	0.81918	0.0150976	7.53807e-08	0.0150975	0.792152	0.0220639	1.14218e-07	0.0220637	0.822782	0.0181909	3.44048e-09	0.0181909	0.792152	0.0115395	1.32004e-08	0.0115395	0.781333	0.00644303	3.98101e-09	0.00644302
0.808371	0.00663452	6.3866e-06	0.00662814	0.826384	0.00460438	1.34297e-06	0.00460304	0.799361	0.00750836	2.50147e-06	0.00750586					0.826384	0.014521	7.26714e-07	0.0145202	0.820981	0.0157686	7.10309e-08	0.0157685	0.793954	0.00775217	1.07428e-07	0.00775206	0.824583	0.0116696	3.19559e-09	0.0116696	0.793954	0.0132283	1.23042e-08	0.0132282	0.783136	0.0104316	3.70393e-09	0.0104316
0.810173	0.00497589	6.08336e-06	0.00496981					0.801164	0.0179664	2.38267e-06	0.0179641									0.822782	0.0174461	6.69319e-08	0.017446	0.795757	0.00327978	1.01042e-07	0.00327967	0.826384	0.00995349	2.96812e-09	0.00995349	0.795757	0.0106952	1.1469e-08	0.0106952	0.78494	0.0110452	3.44616e-09	0.0110452
0.811975	0.00497589	5.79452e-06	0.0049701					0.802966	0.00321787	2.26951e-06	0.0032156									0.824583	0.0161041	6.30698e-08	0.016104	0.797559	0.0122246	9.50355e-08	0.0122245					0.797559	0.0137912	1.06905e-08	0.0137912	0.786743	0.0141133	3.20634e-09	0.0141133
0.813776	0.0071874	5.51942e-06	0.00718188					0.804768	-0.00348602	2.16173e-06	-0.00348818									0.826384	0.0137556	5.94306e-08	0.0137555	0.799361	0.0190823	8.93867e-08	0.0190822					0.799361	0.0123839	9.96484e-09	0.0123839	0.788546	0.0184087	2.98323e-09	0.0184087
0.815577	0.00110575	5.25741e-06	0.00110049					0.80657	0.00724021	2.05908e-06	0.00723815									0.828185	0.0147621	5.60016e-08	0.014762	0.801164	0.0184859	8.40743e-08	0.0184859					0.801164	0.0157613	9.28854e-09	0.0157613	0.790349	0.0217836	2.77567e-09	0.0217836
0.817379	0.00221151	5.00783e-06	0.0022065					0.808371	0.000804473	1.96131e-06	0.000802511									0.829986	0.0144266	5.27704e-08	0.0144265	0.802966	0.024151	7.90776e-08	0.0241509					0.802966	0.0154799	8.65813e-09	0.0154799	0.792152	0.02117	2.58256e-09	0.02117
0.81918	0.00442301	4.7701e-06	0.00441824					0.810173	-0.00214524	1.86819e-06	-0.00214711									0.831787	0.0177816	4.97258e-08	0.0177815	0.804768	0.0208712	7.43781e-08	0.0208711					0.804768	0.0146355	8.07055e-09	0.0146355	0.793954	0.0128861	2.40289e-09	0.0128861
0.820981	0.00221151	4.54368e-06	0.00220697					0.811975	0.00938546	1.77949e-06	0.00938368													0.80657	0.0175915	6.99584e-08	0.0175914					0.80657	0.0112581	7.52289e-09	0.0112581	0.795757	0.0082839	2.23574e-09	0.0082839
0.822782	0.00469945	4.328e-06	0.00469512					0.813776	0.00482681	1.695e-06	0.00482511													0.808371	0.0134172	6.58015e-08	0.0134171					0.808371	0.00956938	7.01243e-09	0.00956937	0.797559	0.0156474	2.08022e-09	0.0156474
0.824583	0.0071874	4.12258e-06	0.00718327					0.815577	0.00804467	1.61454e-06	0.00804306													0.810173	0.0187841	6.18916e-08	0.018784					0.810173	0.0123839	6.53661e-09	0.0123839	0.799361	0.0168746	1.93553e-09	0.0168746
0.826384	0.00608164	3.9269e-06	0.00607772					0.817379	0.0067039	1.5379e-06	0.00670236													0.811975	0.0161007	5.82142e-08	0.0161006					0.811975	0.0106952	6.09309e-09	0.0106952	0.801164	0.0184087	1.80092e-09	0.0184087
0.828185	0.00608164	3.74053e-06	0.0060779					0.81918	0.00804467	1.46489e-06	0.00804321													0.813776	0.0134172	5.47556e-08	0.0134172					0.813776	0.00534759	5.67969e-09	0.00534759	0.802966	0.0101248	1.67567e-09	0.0101248
0.829986	0.00331726	3.563e-06	0.0033137					0.820981	0.00938546	1.39536e-06	0.00938406													0.815577	0.0119264	5.15027e-08	0.0119264					0.815577	0.0126654	5.29438e-09	0.0126653	0.804768	0.0199427	1.55914e-09	0.0199427
0.831787	0.00110575	3.39391e-06	0.00110236					0.822782	0.00938546	1.32912e-06	0.00938413													0.817379	0.0172933	4.84431e-08	0.0172933					0.817379	0.0112581	4.93521e-09	0.0112581	0.80657	0.011352	1.45073e-09	0.011352
0.833588	0.00387014	3.23284e-06	0.0038669					0.824583	0.00402234	1.26604e-06	0.00402107													0.81918	0.0196786	4.55653e-08	0.0196785					0.81918	0.00281452	4.60041e-09	0.00281452	0.808371	0.011352	1.34985e-09	0.011352
0.835388	0.00414657	3.07942e-06	0.00414349					0.826384	0.00563127	1.20595e-06	0.00563007													0.820981	0.0244491	4.28587e-08	0.0244491					0.820981	0.0123839	4.28835e-09	0.0123839	0.810173	0.0177951	1.25599e-09	0.0177951
0.837189	0.00635808	2.93328e-06	0.00635515					0.828185	0.00402234	1.14871e-06	0.00402119													0.822782	0.00775217	4.03128e-08	0.00775213					0.822782	0.00985083	3.99745e-09	0.00985082	0.811975	0.00797709	1.16867e-09	0.00797709
0.83899	0.00497589	2.79408e-06	0.0049731					0.829986	0.00777652	1.09419e-06	0.00777543													0.824583	0.0131191	3.79183e-08	0.013119					0.824583	0.00816212	3.7263e-09	0.00816211	0.813776	0.0156474	1.08742e-09	0.0156474
0.84079	0.00414657	2.66149e-06	0.00414391					0.831787	0.00643575	1.04226e-06	0.0064347													0.826384	0.0137154	3.56661e-08	0.0137153					0.826384	0.0160428	3.47355e-09	0.0160428	0.815577	0.00613622	1.01182e-09	0.00613622
0.842591	0.00193507	2.53519e-06	0.00193253					0.833588	0.0091173	9.92801e-07	0.00911631													0.828185	0.0175915	3.35477e-08	0.0175914					0.828185	0.0109766	3.23796e-09	0.0109766	0.817379	0.0125793	9.41482e-10	0.0125793
0.844392	0.0035937	2.41488e-06	0.00359129					0.835388	0.00804467	9.45684e-07	0.00804373													0.829986	0.00506872	3.15552e-08	0.00506869					0.829986	0.0157613	3.01834e-09	0.0157613	0.81918	0.0174882	8.76032e-10	0.0174882
0.846192	0.0058052	2.30028e-06	0.0058029					0.837189	0.00429049	9.00806e-07	0.00428959													0.831787	0.00954113	2.96811e-08	0.0095411					0.831787	0.00816212	2.81363e-09	0.00816211	0.820981	0.0223972	8.15139e-10	0.0223972
0.847993	0.00552877	2.19112e-06	0.00552657					0.83899	0.00616758	8.58057e-07	0.00616672													0.833588	0.0152062	2.79185e-08	0.0152061					0.833588	0.011821	2.62282e-09	0.011821	0.822782	0.0208632	7.58476e-10	0.0208632
0.826384	0.00846721	3.9269e-06	0.00846328					0.84079	0.012067	8.1734e-07	0.0120662													0.835388	0.0143117	2.62604e-08	0.0143117					0.835388	0.0104137	2.44493e-09	0.0104137	0.824583	0.0131929	7.05757e-10	0.0131929
0.828185	0.00779829	3.74053e-06	0.00779455					0.842591	0.00536312	7.78552e-07	0.00536234													0.837189	0.0155043	2.47008e-08	0.0155043					0.837189	0.0151984	2.27912e-09	0.0151984	0.826384	0.0153406	6.56702e-10	0.0153406
0.829986	0.00388038	3.563e-06	0.00387681					0.844392	0.00616758	7.41607e-07	0.00616684													0.83899	0.00238529	2.32339e-08	0.00238527					0.83899	0.00900648	2.12456e-09	0.00900648	0.828185	0.0131929	6.1106e-10	0.0131929
0.831787	0.00540932	3.39391e-06	0.00540592					0.846192	0.00884914	7.06413e-07	0.00884843													0.84079	0.00626137	2.18542e-08	0.00626135					0.84079	0.0135097	1.98048e-09	0.0135097	0.829986	0.000613619	5.6859e-10	0.000613618
0.833588	0.00703382	3.23284e-06	0.00703059					0.847993	0.00563127	6.7289e-07	0.0056306													0.842591	0.00745401	2.05563e-08	0.00745399					0.842591	0.0121025	1.84617e-09	0.0121024	0.831787	0.0055226	5.29073e-10	0.0055226
0.835388	0.00884944	3.07942e-06	0.00884636					0.849794	0.0091173	6.40959e-07	0.00911666													0.844392	0.00805033	1.93356e-08	0.00805031					0.844392	0.0143541	1.72097e-09	0.0143541	0.833588	0.0107384	4.92305e-10	0.0107384
0.837189	0.00798941	2.93328e-06	0.00798648					0.851594	0.0128715	6.10543e-07	0.0128709													0.846192	0.0116283	1.81873e-08	0.0116282					0.846192	0.0135097	1.60426e-09	0.0135097	0.835388	0.0165678	4.58091e-10	0.0165678
0.83899	0.00884944	2.79408e-06	0.00884665					0.853395	0.00616758	5.81571e-07	0.006167													0.847993	0.0217657	1.71072e-08	0.0217657					0.847993	0.00591049	1.49546e-09	0.00591049	0.837189	0.0138065	4.26255e-10	0.0138065
0.84079	0.00923168	2.66149e-06	0.00922902					0.855195	0.00965361	5.53972e-07	0.00965306													0.849794	0.0122246	1.60913e-08	0.0122246					0.849794	0.00759922	1.39405e-09	0.00759922	0.83899	0.0165678	3.96633e-10	0.0165678
0.842591	0.00932724	2.53519e-06	0.0093247					0.856996	0.00965361	5.27684e-07	0.00965308													0.851594	0.00178896	1.51358e-08	0.00178895					0.851594	0.00619196	1.29951e-09	0.00619196	0.84079	0.0177951	3.6907e-10	0.0177951
0.844392	0.00808497	2.41488e-06	0.00808255																					0.853395	0.000894487	1.42369e-08	0.000894472					0.853395	0.00478468	1.21138e-09	0.00478468	0.842591	0.0181019	3.43422e-10	0.0181019
0.846192	0.00598267	2.30028e-06	0.00598037																					0.855195	-0.0014908	1.33914e-08	-0.00149082					0.855195	0.0135097	1.12923e-09	0.0135097	0.844392	0.0141133	3.19557e-10	0.0141133
0.847993	0.00789385	2.19112e-06	0.00789166																					0.856996	0.00327978	1.25962e-08	0.00327976					0.856996	0.00506613	1.05265e-09	0.00506613	0.846192	0.00736347	2.97349e-10	0.00736347
0.849794	0.0052182	2.08715e-06	0.00521611																					0.858797	0.00477057	1.18482e-08	0.00477055					0.858797	0.00450325	9.81264e-10	0.00450324	0.847993	0.0134997	2.76685e-10	0.0134997
0.851594	0.00598267	1.9881e-06	0.00598068																					0.860597	0.00805033	1.11446e-08	0.00805032					0.860597	0.00816212	9.1472e-10	0.00816212	0.849794	0.00490898	2.57458e-10	0.00490898
0.853395	0.00531376	1.89376e-06	0.00531187																					0.862398	0.0110319	1.04827e-08	0.0110319					0.862398	0.00534759	8.52685e-10	0.00534759	0.851594	0.00736347	2.39566e-10	0.00736347
0.855195	0.00569599	1.80389e-06	0.00569419																																	0.853395	0.00521579	2.22919e-10	0.00521579
0.856996	0.00483596	1.71829e-06	0.00483424																																	0.855195	0.00644303	2.07427e-10	0.00644303
0.858797	0.00378482	1.63675e-06	0.00378318																																	0.856996	0.00368173	1.93012e-10	0.00368173
0.860597	0.00846721	1.55908e-06	0.00846565																																	0.858797	0.000306809	1.79599e-10	0.000306809
0.862398	0.00531376	1.48509e-06	0.00531227																																	0.860597	0.0153406	1.67118e-10	0.0153406
0.864199	0.00321146	1.41461e-06	0.00321005																																	0.862398	0.00521579	1.55505e-10	0.00521579
0.866	0.00502708	1.34748e-06	0.00502574																																	0.864199	-0.00153406	1.44698e-10	-0.00153406
0.8678	0.00321146	1.28353e-06	0.00321018																																	0.866	0.00429536	1.34641e-10	0.00429536
0.869601	0.00464485	1.22262e-06	0.00464362																																	0.8678	-0.00153406	1.25284e-10	-0.00153406
0.871402	0.00254255	1.16459e-06	0.00254139																																	0.869601	0.00306811	1.16577e-10	0.00306811
0.873203	0.00263811	1.10932e-06	0.002637																																	0.871402	-0.00368174	1.08474e-10	-0.00368174
0.875004	0.00321146	1.05666e-06	0.00321041																																	0.873203	-0.00337493	1.00935e-10	-0.00337493
0.876805	0.00607823	1.00651e-06	0.00607722																																	0.875004	-0.00153406	9.39196e-11	-0.00153406
																																				0.876805	0.00767028	8.73916e-11	0.00767028

## Sheet: Fig4(wavelength)
Pulse width of gate driver 3.173184 [ns]				Pulse width of gate driver 3.301326 [ns]				Pulse width of gate driver 3.55761 [ns]				Pulse width of gate driver 3.942036 [ns]				Pulse width of gate driver 4.070178 [ns]				Pulse width of gate driver 4.326462 [ns]				Pulse width of gate driver 4.710888 [ns]				Pulse width of gate driver 5.095314 [ns]				Pulse width of gate driver 5.223456 [ns]
Wavelength [nm]	Intensity total [a.u.]	Intensity pulse [a.u.]	Intensity tail [a.u.]	Wavelength [nm]	Intensity total [a.u.]	Intensity pulse [a.u.]	Intensity tail [a.u.]	Wavelength [nm]	Intensity total [a.u.]	Intensity pulse [a.u.]	Intensity tail [a.u.]	Wavelength [nm]	Intensity total [a.u.]	Intensity pulse [a.u.]	Intensity tail [a.u.]	Wavelength [nm]	Intensity total [a.u.]	Intensity pulse [a.u.]	Intensity tail [a.u.]	Wavelength [nm]	Intensity total [a.u.]	Intensity pulse [a.u.]	Intensity tail [a.u.]	Wavelength [nm]	Intensity total [a.u.]	Intensity pulse [a.u.]	Intensity tail [a.u.]	Wavelength [nm]	Intensity total [a.u.]	Intensity pulse [a.u.]	Intensity tail [a.u.]	Wavelength [nm]	Intensity total [a.u.]	Intensity pulse [a.u.]	Intensity tail [a.u.]
809.165	1.26026	0.575221	0.685039	809.165	1.1328	0.514019	0.618784	809.165	1.33568	0.666667	0.669014	809.165	1.37975	0.621359	0.758389	809.165	1.412	0.71875	0.693252	809.165	1.28758	0.557692	0.729885	809.165	1.51313	0.770992	0.742138	809.165	1.49726	0.756757	0.740506	809.165	1.45619	0.713333	0.742857
809.207	1.25719	0.690265	0.566929	809.207	1.32648	0.785047	0.541436	809.207	1.24965	0.686275	0.56338	809.207	1.46211	0.84466	0.61745	809.207	1.60193	0.927083	0.674847	809.207	1.51879	0.903846	0.614943	809.207	1.50367	0.824427	0.679245	809.207	1.54251	0.871622	0.670886	809.207	1.45714	0.84	0.617143
809.249	0.971012	0.451327	0.519685	809.249	1.18418	0.626168	0.558011	809.249	1.08851	0.539216	0.549296	809.249	1.17912	0.601942	0.577181	809.249	1.19498	0.59375	0.601227	809.249	1.18778	0.509615	0.678161	809.249	1.27241	0.618321	0.654088	809.249	1.35588	0.722973	0.632911	809.249	1.24667	0.646667	0.6
809.291	0.748798	0.221239	0.527559	809.291	0.50142	0.158879	0.342541	809.291	0.724247	0.196078	0.528169	809.291	0.692383	0.242718	0.449664	809.291	0.623083	0.1875	0.435583	809.291	0.673077	0.173077	0.5	809.291	0.849873	0.183206	0.666667	809.291	0.866832	0.195946	0.670886	809.291	0.880952	0.246667	0.634286
809.333	1.49153	0.60177	0.889764	809.333	1.4519	0.672897	0.779006	809.333	1.57912	0.705882	0.873239	809.333	1.4827	0.650486	0.832215	809.333	1.52614	0.697917	0.828221	809.333	1.59671	0.740385	0.856322	809.333	1.71348	0.801527	0.91195	809.333	1.77027	0.77027	1	809.333	1.71429	0.76	0.954286
809.375	1.36151	0.707965	0.653543	809.375	1.34776	0.728972	0.618784	809.375	1.43372	0.764706	0.669014	809.375	1.61875	0.873786	0.744966	809.375	1.57752	0.822917	0.754601	809.375	1.51835	0.788462	0.729885	809.375	1.56882	0.801527	0.767296	809.375	1.72058	0.885135	0.835443	809.375	1.62952	0.846667	0.782857
809.418	0.852972	0.380531	0.472441	809.418	0.884184	0.514019	0.370166	809.418	0.9467	0.460784	0.485916	809.418	0.900828	0.504854	0.395973	809.418	1.03361	0.604167	0.429448	809.418	1.00409	0.567308	0.436782	809.418	1.16103	0.557252	0.603774	809.418	1.15156	0.594595	0.556962	809.418	1.14762	0.633333	0.514286
809.46	1.31635	0.584071	0.732283	809.46	1.08778	0.457944	0.629834	809.46	1.25325	0.54902	0.704225	809.46	1.18942	0.504854	0.684564	809.46	1.29441	0.552083	0.742331	809.46	1.30858	0.538462	0.770115	809.46	1.32858	0.580153	0.748428	809.46	1.50479	0.675676	0.829114	809.46	1.45238	0.606667	0.845714
809.502	1.08313	0.539823	0.543307	809.502	1.1642	0.64486	0.519337	809.502	1.2665	0.696078	0.570423	809.502	1.35447	0.669903	0.684564	809.502	1.45795	0.770833	0.687117	809.502	1.33621	0.75	0.586207	809.502	1.31327	0.671756	0.641509	809.502	1.46981	0.722973	0.746835	809.502	1.42952	0.726667	0.702857
809.544	1.15992	0.522124	0.637795	809.544	0.940311	0.448598	0.491713	809.544	1.20519	0.578431	0.626761	809.544	1.17756	0.553398	0.624161	809.544	1.18955	0.520833	0.668712	809.544	1.28017	0.625	0.655172	809.544	1.41029	0.687023	0.72327	809.544	1.42627	0.635135	0.791139	809.544	1.33524	0.626667	0.708571
809.587	1.25127	0.707965	0.543307	809.587	1.16084	0.542056	0.618784	809.587	1.42115	0.745098	0.676056	809.587	1.44328	0.718447	0.724832	809.587	1.44338	0.645833	0.797546	809.587	1.29001	0.692308	0.597701	809.587	1.43363	0.748092	0.685535	809.587	1.54961	0.783784	0.765823	809.587	1.43619	0.733333	0.702857
809.629	1.49049	0.663717	0.826772	809.629	1.35762	0.523365	0.834254	809.629	1.5834	0.696078	0.887324	809.629	1.48342	0.631068	0.852349	809.629	1.50288	0.65625	0.846626	809.629	1.57162	0.692308	0.87931	809.629	1.71213	0.793893	0.918239	809.629	1.80953	0.79054	1.01899	809.629	1.65143	0.72	0.931429
809.671	1.43133	0.769911	0.661417	809.671	1.39366	0.719626	0.674033	809.671	1.51975	0.745098	0.774648	809.671	1.66573	0.873786	0.791946	809.671	1.5972	0.78125	0.815951	809.671	1.6029	0.855769	0.747127	809.671	1.65999	0.854962	0.805031	809.671	1.73366	0.891892	0.841772	809.671	1.7381	0.926667	0.811428
809.713	1.1441	0.59292	0.551181	809.713	1.19859	0.728972	0.469613	809.713	1.219	0.627451	0.591549	809.713	1.32332	0.786408	0.536913	809.713	1.31627	0.739583	0.576687	809.713	1.34792	0.807692	0.54023	809.713	1.46282	0.770992	0.691824	809.713	1.51206	0.79054	0.721519	809.713	1.39905	0.833333	0.565714
809.755	1.18932	0.646018	0.543307	809.755	1.30273	0.672897	0.629834	809.755	1.24965	0.686275	0.56338	809.755	1.49326	0.728155	0.765101	809.755	1.55055	0.802083	0.748466	809.755	1.46463	0.769231	0.695402	809.755	1.50593	0.801527	0.704403	809.755	1.59442	0.891892	0.702532	809.755	1.49143	0.84	0.651429
809.798	1.14417	0.522124	0.622047	809.798	1.01683	0.392523	0.624309	809.798	1.2404	0.578431	0.661972	809.798	1.22969	0.504854	0.724832	809.798	1.18411	0.447917	0.736196	809.798	1.14943	0.5	0.649425	809.798	1.42786	0.572519	0.855346	809.798	1.4651	0.648649	0.816456	809.798	1.3419	0.593333	0.748571
809.84	0.78984	0.522124	0.267717	809.84	0.857851	0.476635	0.381215	809.84	0.961199	0.637255	0.323944	809.84	0.936795	0.621359	0.315436	809.84	1.00722	0.614583	0.392638	809.84	0.981432	0.653846	0.327586	809.84	1.08234	0.717557	0.36478	809.84	1.10571	0.77027	0.335443	809.84	1.17619	0.833333	0.342857
809.882	1.27392	0.699115	0.574803	809.882	1.40512	0.747664	0.657458	809.882	1.36882	0.784314	0.584507	809.882	1.42399	0.786408	0.637584	809.882	1.59279	0.875	0.717791	809.882	1.35334	0.721154	0.632184	809.882	1.42014	0.778626	0.641509	809.882	1.54499	0.810811	0.734177	809.882	1.52762	0.853333	0.674286
809.924	1.26019	0.646018	0.614173	809.924	1.09542	0.476635	0.618784	809.924	1.33513	0.764706	0.570423	809.924	1.30078	0.669903	0.630872	809.924	1.43469	0.729167	0.705522	809.924	1.35511	0.682692	0.672414	809.924	1.46911	0.770992	0.698113	809.924	1.51249	0.797297	0.71519	809.924	1.36095	0.686667	0.674286
809.966	1.13713	0.672566	0.464567	809.966	0.97093	0.401869	0.569061	809.966	1.09928	0.627451	0.471831	809.966	1.20753	0.650486	0.557047	809.966	1.30042	0.65625	0.644172	809.966	1.19408	0.653846	0.54023	809.966	1.34692	0.755725	0.591195	809.966	1.37829	0.777027	0.601266	809.966	1.32952	0.746667	0.582857
810.008	1.23455	0.699115	0.535433	810.008	1.35922	0.757009	0.60221	810.008	1.34921	0.764706	0.584507	810.008	1.54121	0.883495	0.657718	810.008	1.52716	0.864583	0.662577	810.008	1.49392	0.913462	0.58046	810.008	1.52701	0.885496	0.641509	810.008	1.59023	0.925676	0.664557	810.008	1.56286	0.98	0.582857
810.051	1.12264	0.39823	0.72441	810.051	1.05633	0.448598	0.607735	810.051	1.15548	0.401961	0.753521	810.051	1.0722	0.407767	0.66443	810.051	1.1326	0.427083	0.705522	810.051	1.14523	0.403846	0.741379	810.051	1.34884	0.480916	0.867924	810.051	1.4025	0.45946	0.943038	810.051	1.29905	0.453333	0.845714
810.093	1.12452	0.486726	0.637795	810.093	0.885527	0.35514	0.530387	810.093	1.14361	0.509804	0.633803	810.093	1.08047	0.456311	0.624161	810.093	1.03445	0.427083	0.607362	810.093	1.04763	0.432692	0.614943	810.093	1.21811	0.48855	0.72956	810.093	1.29242	0.52027	0.772152	810.093	1.29905	0.493333	0.805714
810.135	1.29663	0.619469	0.677165	810.135	1.20204	0.588785	0.61326	810.135	1.2879	0.647059	0.640845	810.135	1.24995	0.592233	0.657718	810.135	1.29799	0.635417	0.662577	810.135	1.38771	0.692308	0.695402	810.135	1.38965	0.641221	0.748428	810.135	1.51411	0.722973	0.791139	810.135	1.47143	0.7	0.771429
810.177	1.14605	0.610619	0.535433	810.177	1.00238	0.411215	0.59116	810.177	1.17122	0.607843	0.56338	810.177	1.16042	0.563107	0.597315	810.177	1.1907	0.583333	0.607362	810.177	1.14567	0.519231	0.626437	810.177	1.2908	0.687023	0.603774	810.177	1.31406	0.662162	0.651899	810.177	1.31714	0.62	0.697143
810.219	0.989757	0.40708	0.582677	810.219	0.991325	0.411215	0.58011	810.219	1.12676	0.5	0.626761	810.219	1.14387	0.466019	0.677852	810.219	1.04429	0.40625	0.638037	810.219	1.09151	0.384615	0.706897	810.219	1.34164	0.51145	0.830189	810.219	1.39078	0.574324	0.816456	810.219	1.27905	0.473333	0.805714
810.262	1.07449	0.318584	0.755906	810.262	0.781897	0.196262	0.585635	810.262	1.06821	0.392157	0.676056	810.262	1.00052	0.349515	0.651007	810.262	0.849374	0.260417	0.588957	810.262	1.15672	0.403846	0.752873	810.262	1.25541	0.450382	0.805031	810.262	1.24932	0.439189	0.810127	810.262	1.2419	0.453333	0.788571
810.304	1.28569	0.734513	0.551181	810.304	1.14933	0.635514	0.513812	810.304	1.25394	0.676471	0.577465	810.304	1.42458	0.679612	0.744966	810.304	1.51259	0.739583	0.773006	810.304	1.36881	0.759615	0.609195	810.304	1.42642	0.778626	0.647799	810.304	1.5201	0.817568	0.702532	810.304	1.51143	0.82	0.691429
810.346	1.1549	0.619469	0.535433	810.346	1.2513	0.682243	0.569061	810.346	1.3158	0.696078	0.619718	810.346	1.50681	0.815534	0.691275	810.346	1.4414	0.760417	0.680982	810.346	1.36671	0.711538	0.655172	810.346	1.42153	0.679389	0.742138	810.346	1.52934	0.763513	0.765823	810.346	1.52	0.8	0.72
810.388	0.861752	0.460177	0.401575	810.388	0.959002	0.46729	0.491713	810.388	1.13201	0.568627	0.56338	810.388	1.02463	0.514563	0.510067	810.388	1.15203	0.59375	0.558282	810.388	1.13053	0.567308	0.563218	810.388	1.2715	0.648855	0.622641	810.388	1.38796	0.72973	0.658228	810.388	1.28952	0.666667	0.622857
810.43	0.946415	0.442478	0.503937	810.43	0.88594	0.383178	0.502762	810.43	1.04253	0.45098	0.591549	810.43	1.11859	0.514563	0.604027	810.43	1.13804	0.5	0.638037	810.43	1.05548	0.480769	0.574713	810.43	1.20011	0.564886	0.63522	810.43	1.31654	0.601351	0.71519	810.43	1.16095	0.486667	0.674286
810.473	1.38018	0.734513	0.645669	810.473	1.2463	0.46729	0.779006	810.473	1.40583	0.715686	0.690141	810.473	1.50068	0.708738	0.791946	810.473	1.5347	0.71875	0.815951	810.473	1.47966	0.692308	0.787356	810.473	1.55624	0.801527	0.754717	810.473	1.6129	0.783784	0.829114	810.473	1.61905	0.813333	0.805714
810.515	0.910808	0.619469	0.291339	810.515	1.04095	0.654206	0.38674	810.515	1.05523	0.696078	0.359155	810.515	1.26148	0.825243	0.436242	810.515	1.3217	0.8125	0.509203	810.515	1.16202	0.788462	0.373563	810.515	1.2629	0.778626	0.484277	810.515	1.26274	0.851351	0.411392	810.515	1.28762	0.813333	0.474286
810.557	1.50031	0.681416	0.818898	810.557	1.40853	0.728972	0.679558	810.557	1.54087	0.745098	0.795775	810.557	1.56793	0.796117	0.771812	810.557	1.58979	0.822917	0.766871	810.557	1.5567	0.798077	0.758621	810.557	1.66004	0.748092	0.91195	810.557	1.72597	0.77027	0.955696	810.557	1.64857	0.78	0.868571
810.599	1.41258	0.814159	0.598425	810.599	1.38943	0.682243	0.707182	810.599	1.46838	0.862745	0.605634	810.599	1.68359	0.84466	0.838926	810.599	1.67996	0.833333	0.846626	810.599	1.6355	0.865385	0.770115	810.599	1.62226	0.854962	0.767296	810.599	1.62692	0.905405	0.721519	810.599	1.70095	0.906667	0.794286
810.641	0.883353	0.513274	0.370079	810.641	0.863789	0.504673	0.359116	810.641	0.830986	0.5	0.330986	810.641	1.06659	0.650486	0.416107	810.641	1.08384	0.666667	0.417178	810.641	1.01592	0.653846	0.362069	810.641	0.980844	0.641221	0.339623	810.641	1.13565	0.743243	0.392405	810.641	1.15048	0.733333	0.417143
810.683	1.22981	0.513274	0.716535	810.683	1.01595	0.457944	0.558011	810.683	1.21955	0.529412	0.690141	810.683	1.22082	0.563107	0.657718	810.683	1.29672	0.677083	0.619632	810.683	1.26857	0.596154	0.672414	810.683	1.35643	0.59542	0.761006	810.683	1.45706	0.621622	0.835443	810.683	1.42381	0.646667	0.777143
810.726	1.06543	0.522124	0.543307	810.726	1.08349	0.542056	0.541436	810.726	1.16998	0.578431	0.591549	810.726	1.21196	0.621359	0.590604	810.726	1.27959	0.635417	0.644172	810.726	1.19386	0.596154	0.597701	810.726	1.32719	0.679389	0.647799	810.726	1.33596	0.608108	0.727848	810.726	1.43905	0.753333	0.685714
810.768	1.20911	0.539823	0.669291	810.768	1.098	0.401869	0.696133	810.768	1.30226	0.598039	0.704225	810.768	1.21255	0.514563	0.697987	810.768	1.21837	0.53125	0.687117	810.768	1.18767	0.480769	0.706897	810.768	1.40136	0.564886	0.836478	810.768	1.51659	0.662162	0.85443	810.768	1.38476	0.573333	0.811428
810.81	1.28089	0.619469	0.661417	810.81	1.16384	0.495327	0.668508	810.81	1.2741	0.598039	0.676056	810.81	1.29107	0.660194	0.630872	810.81	1.23121	0.5625	0.668712	810.81	1.25309	0.557692	0.695402	810.81	1.44937	0.694657	0.754717	810.81	1.4858	0.675676	0.810127	810.81	1.4219	0.633333	0.788571
810.852	1.61438	0.787611	0.826772	810.852	1.33975	0.560748	0.779006	810.852	1.62483	0.843137	0.78169	810.852	1.52668	0.640777	0.885906	810.852	1.62372	0.666667	0.957055	810.852	1.51989	0.692308	0.827586	810.852	1.62274	0.78626	0.836478	810.852	1.65549	0.756757	0.898734	810.852	1.6219	0.793333	0.828571
810.894	0.772281	0.362832	0.409449	810.894	0.823463	0.392523	0.430939	810.894	0.901961	0.401961	0.5	810.894	0.943963	0.427185	0.516779	810.894	1.04231	0.520833	0.521472	810.894	1.0116	0.528846	0.482759	810.894	1.0627	0.427481	0.63522	810.894	1.16926	0.574324	0.594937	810.894	1.20286	0.58	0.622857
810.937	1.20626	0.442478	0.763779	810.937	1.05974	0.429907	0.629834	810.937	1.28445	0.509804	0.774648	810.937	1.2581	0.553398	0.704698	810.937	1.22265	0.541667	0.680982	810.937	1.17606	0.451923	0.724138	810.937	1.44404	0.557252	0.886792	810.937	1.48153	0.608108	0.873418	810.937	1.49429	0.58	0.914286
810.979	0.915825	0.522124	0.393701	810.979	0.910156	0.401869	0.508287	810.979	1.02361	0.558824	0.464789	810.979	1.0462	0.475728	0.57047	810.979	1.12877	0.552083	0.576687	810.979	1.0326	0.509615	0.522988	810.979	1.16549	0.618321	0.54717	810.979	1.16849	0.662162	0.506329	810.979	1.12952	0.626667	0.502857
811.021	0.987875	0.318584	0.669291	811.021	0.795477	0.242991	0.552486	811.021	1.12552	0.470588	0.65493	811.021	0.949827	0.359223	0.590604	811.021	1.01917	0.375	0.644172	811.021	0.926503	0.317308	0.609195	811.021	1.24504	0.534351	0.710692	811.021	1.23289	0.47973	0.753165	811.021	1.16095	0.446667	0.714286
811.063	1.45593	0.778761	0.677165	811.063	1.26669	0.476635	0.790055	811.063	1.48702	0.803922	0.683099	811.063	1.6499	0.757282	0.892617	811.063	1.63714	0.729167	0.907975	811.063	1.47569	0.653846	0.821839	811.063	1.6537	0.854962	0.798742	811.063	1.62308	0.844595	0.778481	811.063	1.63524	0.806667	0.828571
811.106	0.954359	0.371681	0.582677	811.106	0.74534	0.214953	0.530387	811.106	1.10163	0.460784	0.640845	811.106	1.01622	0.378641	0.637584	811.106	0.925997	0.3125	0.613497	811.106	1.00321	0.336539	0.666667	811.106	1.18849	0.427481	0.761006	811.106	1.22571	0.466216	0.759494	811.106	1.19333	0.393333	0.8
811.148	1.13637	0.451327	0.685039	811.148	1.09965	0.514019	0.585635	811.148	1.13132	0.441177	0.690141	811.148	1.13801	0.533981	0.604027	811.148	1.15088	0.53125	0.619632	811.148	1.19739	0.519231	0.678161	811.148	1.27966	0.480916	0.798742	811.148	1.4486	0.587838	0.86076	811.148	1.35143	0.54	0.811428
811.19	0.780085	0.433628	0.346457	811.19	0.729953	0.420561	0.309392	811.19	0.762358	0.431373	0.330986	811.19	0.964228	0.514563	0.449664	811.19	1.03361	0.604167	0.429448	811.19	0.981101	0.567308	0.413793	811.19	1.03255	0.541985	0.490566	811.19	1.02326	0.567568	0.455696	811.19	1.0419	0.573333	0.468571
811.232	0.80078	0.40708	0.393701	811.232	0.970414	0.616822	0.353591	811.232	0.891605	0.490196	0.401409	811.232	1.02333	0.640777	0.38255	811.232	1.03048	0.65625	0.374233	811.232	1.06189	0.653846	0.408046	811.232	1.04739	0.519084	0.528302	811.232	1.20091	0.574324	0.626582	811.232	1.18381	0.646667	0.537143
811.274	1.32709	0.681416	0.645669	811.274	1.31631	0.719626	0.596685	811.274	1.44228	0.745098	0.697183	811.274	1.52023	0.815534	0.704698	811.274	1.64986	0.864583	0.785276	811.274	1.61826	0.865385	0.752873	811.274	1.72154	0.847328	0.874214	811.274	1.65729	0.885135	0.772152	811.274	1.64476	0.873333	0.771429
811.317	0.897359	0.283186	0.614173	811.317	0.759333	0.28972	0.469613	811.317	0.874344	0.303922	0.570423	811.317	0.843878	0.320388	0.52349	811.317	0.917881	0.427083	0.490797	811.317	0.813329	0.278846	0.534483	811.317	1.0807	0.351145	0.72956	811.317	1.22143	0.398649	0.822785	811.317	1.22571	0.46	0.765714
811.359	1.20326	0.486726	0.716535	811.359	1.09031	0.504673	0.585635	811.359	1.3013	0.519608	0.78169	811.359	1.19541	0.524272	0.671141	811.359	1.33781	0.6875	0.650307	811.359	1.12434	0.451923	0.672414	811.359	1.45437	0.580153	0.874214	811.359	1.54567	0.621622	0.924051	811.359	1.41048	0.553333	0.857143
811.401	1.66156	0.858407	0.80315	811.401	1.42345	0.616822	0.80663	811.401	1.69249	0.833333	0.859155	811.401	1.69916	0.786408	0.912752	811.401	1.62117	0.75	0.871166	811.401	1.69872	0.865385	0.833333	811.401	1.78756	0.900763	0.886792	811.401	1.87761	0.966216	0.911392	811.401	1.78095	0.866667	0.914286
811.443	1.6833	0.769911	0.913386	811.443	1.46424	0.635514	0.828729	811.443	1.75739	0.813725	0.943662	811.443	1.69988	0.76699	0.932886	811.443	1.6751	0.791667	0.883436	811.443	1.70988	0.778846	0.931034	811.443	1.86125	0.854962	1.00629	811.443	1.8741	0.810811	1.06329	811.443	1.88667	0.886667	1
811.485	1.23552	0.707965	0.527559	811.485	1.18118	0.672897	0.508287	811.485	1.26526	0.666667	0.598592	811.485	1.46739	0.883495	0.583893	811.485	1.41501	0.770833	0.644172	811.485	1.40749	0.855769	0.551724	811.485	1.42374	0.763359	0.660377	811.485	1.56064	0.858108	0.702532	811.485	1.44762	0.853333	0.594286
811.528	1.09198	0.548673	0.543307	811.528	1.04864	0.551402	0.497238	811.528	1.20643	0.607843	0.598592	811.528	1.2104	0.572816	0.637584	811.528	1.29371	0.625	0.668712	811.528	1.31112	0.701923	0.609195	811.528	1.37256	0.687023	0.685535	811.528	1.42337	0.689189	0.734177	811.528	1.38	0.7	0.68
811.57	1.43439	0.654867	0.779528	811.57	1.42769	0.654206	0.773481	811.57	1.6055	0.77451	0.830986	811.57	1.52909	0.757282	0.771812	811.57	1.52786	0.791667	0.736196	811.57	1.50663	0.730769	0.775862	811.57	1.74132	0.816794	0.924528	811.57	1.79439	0.851351	0.943038	811.57	1.66476	0.773333	0.891429
811.612	1.03589	0.539823	0.496063	811.612	0.981515	0.495327	0.486188	811.612	1.11212	0.598039	0.514085	811.612	1.12159	0.524272	0.597315	811.612	1.17229	0.583333	0.588957	811.612	1.17849	0.586538	0.591954	811.612	1.19602	0.648855	0.54717	811.612	1.25753	0.668919	0.588608	811.612	1.26095	0.626667	0.634286
811.654	0.970107	0.371681	0.598425	811.654	0.768214	0.392523	0.375691	811.654	1.09611	0.441177	0.65493	811.654	1.01492	0.504854	0.510067	811.654	0.965107	0.4375	0.527607	811.654	1.10367	0.557692	0.545977	811.654	1.31826	0.557252	0.761006	811.654	1.43594	0.587838	0.848101	811.654	1.32476	0.553333	0.771429
811.696	1.3921	0.628319	0.763779	811.696	1.14349	0.364486	0.779006	811.696	1.53107	0.735294	0.795775	811.696	1.44302	0.543689	0.899329	811.696	1.39628	0.53125	0.865031	811.696	1.36229	0.557692	0.804598	811.696	1.58188	0.732824	0.849057	811.696	1.62804	0.722973	0.905063	811.696	1.48857	0.66	0.828571
811.738	1.25322	0.725664	0.527559	811.738	1.17995	0.588785	0.59116	811.738	1.2451	0.745098	0.5	811.738	1.32619	0.708738	0.61745	811.738	1.29486	0.6875	0.607362	811.738	1.29576	0.692308	0.603448	811.738	1.31682	0.763359	0.553459	811.738	1.37111	0.763513	0.607595	811.738	1.35143	0.74	0.611429
811.781	1.52972	0.80531	0.72441	811.781	1.46078	0.775701	0.685083	811.781	1.66156	0.823529	0.838028	811.781	1.71727	0.932039	0.785235	811.781	1.7553	0.927083	0.828221	811.781	1.66059	0.913462	0.747127	811.781	1.73902	0.946565	0.792453	811.781	1.80628	0.939189	0.867089	811.781	1.75714	0.98	0.777143
811.823	0.878475	0.469027	0.409449	811.823	0.822585	0.457944	0.364641	811.823	0.957747	0.5	0.457747	811.823	0.957516	0.514563	0.442953	811.823	0.960123	0.5	0.460123	811.823	0.98309	0.586538	0.396552	811.823	0.993471	0.534351	0.45912	811.823	1.13813	0.682432	0.455696	811.823	1.17429	0.66	0.514286
811.865	0.907045	0.442478	0.464567	811.865	0.930965	0.439252	0.491713	811.865	0.952499	0.431373	0.521127	811.865	1.02007	0.456311	0.563758	811.865	1.10052	0.572917	0.527607	811.865	0.951702	0.394231	0.557471	811.865	1.19022	0.580153	0.610063	811.865	1.18825	0.574324	0.613924	811.865	1.10762	0.513333	0.594286
811.907	1.15184	0.734513	0.417323	811.907	1.19946	0.663551	0.535912	811.907	1.25366	0.72549	0.528169	811.907	1.38972	0.805825	0.583893	811.907	1.46281	0.8125	0.650307	811.907	1.36903	0.817308	0.551724	811.907	1.30558	0.770992	0.534591	811.907	1.47922	0.871622	0.607595	811.907	1.38667	0.826667	0.56
811.949	1.02306	0.566372	0.456693	811.949	1.00403	0.523365	0.480663	811.949	1.20312	0.696078	0.507042	811.949	1.25451	0.650486	0.604027	811.949	1.19626	0.552083	0.644172	811.949	1.1439	0.557692	0.586207	811.949	1.27822	0.687023	0.591195	811.949	1.36563	0.777027	0.588608	811.949	1.23714	0.66	0.577143
811.992	1.06829	0.619469	0.448819	811.992	1.15867	0.64486	0.513812	811.992	1.1918	0.705882	0.485916	811.992	1.31133	0.747573	0.563758	811.992	1.27646	0.6875	0.588957	811.992	1.33267	0.826923	0.505747	811.992	1.38869	0.778626	0.610063	811.992	1.35169	0.756757	0.594937	811.992	1.34476	0.773333	0.571429
812.034	0.930737	0.371681	0.559055	812.034	0.921206	0.401869	0.519337	812.034	0.976664	0.392157	0.584507	812.034	0.972242	0.38835	0.583893	812.034	1.0209	0.46875	0.552147	812.034	0.959328	0.384615	0.574713	812.034	1.09011	0.40458	0.685535	812.034	1.15951	0.52027	0.63924	812.034	1.1181	0.466667	0.651429
812.076	1.51	0.840708	0.669291	812.076	1.36733	0.682243	0.685083	812.076	1.43096	0.754902	0.676056	812.076	1.52838	0.776699	0.751678	812.076	1.61005	0.8125	0.797546	812.076	1.56841	0.855769	0.712644	812.076	1.57151	0.816794	0.754717	812.076	1.65096	0.885135	0.765823	812.076	1.53429	0.82	0.714286
812.118	1.28479	0.654867	0.629921	812.118	1.35282	0.82243	0.530387	812.118	1.36205	0.735294	0.626761	812.118	1.40985	0.805825	0.604027	812.118	1.43028	0.822917	0.607362	812.118	1.39788	0.846154	0.551724	812.118	1.49292	0.763359	0.72956	812.118	1.62265	0.837838	0.78481	812.118	1.59524	0.886667	0.708571
812.16	1.00258	0.380531	0.622047	812.16	1.00697	0.598131	0.40884	812.16	0.946976	0.411765	0.535211	812.16	1.02248	0.572816	0.449664	812.16	1.06614	0.59375	0.472393	812.16	1.17286	0.615385	0.557471	812.16	1.11254	0.496183	0.616352	812.16	1.21485	0.594595	0.620253	812.16	1.18381	0.566667	0.617143
812.202	1.55627	0.831858	0.72441	812.202	1.41746	0.71028	0.707182	812.202	1.64444	0.862745	0.78169	812.202	1.74783	0.92233	0.825503	812.202	1.71977	0.885417	0.834356	812.202	1.79277	0.913462	0.87931	812.202	1.69682	0.885496	0.811321	812.202	1.76197	0.939189	0.822785	812.202	1.76952	0.906667	0.862857
812.245	1.29169	0.646018	0.645669	812.245	1.23984	0.654206	0.585635	812.245	1.46065	0.735294	0.725352	812.245	1.43357	0.708738	0.724832	812.245	1.42555	0.677083	0.748466	812.245	1.34748	0.692308	0.655172	812.245	1.54458	0.770992	0.773585	812.245	1.60871	0.817568	0.791139	812.245	1.44857	0.7	0.748571
812.287	1.29454	0.743363	0.551181	812.287	1.31843	0.738318	0.58011	812.287	1.3198	0.735294	0.584507	812.287	1.60018	0.92233	0.677852	812.287	1.60321	0.885417	0.717791	812.287	1.51503	0.923077	0.591954	812.287	1.55442	0.862595	0.691824	812.287	1.6371	0.966216	0.670886	812.287	1.54667	0.866667	0.68
812.329	1.27009	0.59292	0.677165	812.329	1.12346	0.504673	0.618784	812.329	1.30931	0.598039	0.711268	812.329	1.30592	0.621359	0.684564	812.329	1.32867	0.635417	0.693252	812.329	1.35477	0.596154	0.758621	812.329	1.49517	0.740458	0.754717	812.329	1.55209	0.722973	0.829114	812.329	1.47524	0.686667	0.788571
812.371	1.28486	0.584071	0.700787	812.371	1.23731	0.607477	0.629834	812.371	1.47929	0.676471	0.802817	812.371	1.33505	0.650486	0.684564	812.371	1.39916	0.6875	0.711657	812.371	1.44905	0.701923	0.747127	812.371	1.50689	0.664122	0.842767	812.371	1.66182	0.756757	0.905063	812.371	1.5219	0.693333	0.828571
812.413	1.2011	0.681416	0.519685	812.413	1.14809	0.551402	0.596685	812.413	1.34217	0.764706	0.577465	812.413	1.43214	0.747573	0.684564	812.413	1.32311	0.666667	0.656442	812.413	1.36859	0.701923	0.666667	812.413	1.42417	0.801527	0.622641	812.413	1.5408	0.844595	0.696202	812.413	1.4981	0.806667	0.691429
812.456	1.34402	0.477876	0.866142	812.456	1.01947	0.196262	0.823204	812.456	1.41273	0.490196	0.922535	812.456	1.30781	0.38835	0.919463	812.456	1.22533	0.354167	0.871166	812.456	1.30018	0.346154	0.954023	812.456	1.41759	0.442748	0.974843	812.456	1.51223	0.493243	1.01899	812.456	1.4019	0.373333	1.02857
812.498	0.698558	0.265487	0.433071	812.498	0.604224	0.261682	0.342541	812.498	0.851422	0.372549	0.478873	812.498	0.758194	0.368932	0.389262	812.498	0.836273	0.4375	0.398773	812.498	0.831123	0.423077	0.408046	812.498	0.999808	0.427481	0.572327	812.498	1.01215	0.391892	0.620253	812.498	1.10286	0.52	0.582857
812.54	1.13323	0.637168	0.496063	812.54	1.22538	0.672897	0.552486	812.54	1.16418	0.607843	0.556338	812.54	1.35219	0.640777	0.711409	812.54	1.28502	0.708333	0.576687	812.54	1.37843	0.769231	0.609195	812.54	1.43631	0.763359	0.672956	812.54	1.45381	0.77027	0.683544	812.54	1.42762	0.793333	0.634286
812.582	1.04968	0.522124	0.527559	812.582	1.25807	0.766355	0.491713	812.582	1.33168	0.627451	0.704225	812.582	1.36502	0.747573	0.61745	812.582	1.44683	0.833333	0.613497	812.582	1.45137	0.807692	0.643678	812.582	1.6344	0.816794	0.81761	812.582	1.57621	0.804054	0.772152	812.582	1.47238	0.746667	0.725714
812.625	1.37335	0.672566	0.700787	812.625	1.41617	0.747664	0.668508	812.625	1.38898	0.705882	0.683099	812.625	1.4784	0.76699	0.711409	812.625	1.56768	0.84375	0.723926	812.625	1.5683	0.826923	0.741379	812.625	1.53694	0.763359	0.773585	812.625	1.66319	0.878378	0.78481	812.625	1.55524	0.766667	0.788571
812.667	1.2682	0.504425	0.763779	812.667	1.08948	0.448598	0.640884	812.667	1.35764	0.519608	0.838028	812.667	1.24611	0.514563	0.731544	812.667	1.25888	0.510417	0.748466	812.667	1.31034	0.5	0.810345	812.667	1.55091	0.664122	0.886792	812.667	1.63856	0.689189	0.949367	812.667	1.42286	0.56	0.862857
812.709	1.00934	0.513274	0.496063	812.709	1.08902	0.542056	0.546961	812.709	1.2248	0.598039	0.626761	812.709	1.25295	0.601942	0.651007	812.709	1.14903	0.541667	0.607362	812.709	1.21121	0.625	0.586207	812.709	1.26612	0.618321	0.647799	812.709	1.31868	0.635135	0.683544	812.709	1.47429	0.76	0.714286
812.751	1.03387	0.59292	0.440945	812.751	1.04694	0.560748	0.486188	812.751	1.10356	0.617647	0.485916	812.751	1.23666	0.679612	0.557047	812.751	1.36535	0.739583	0.625767	812.751	1.19397	0.625	0.568966	812.751	1.3137	0.709924	0.603774	812.751	1.33399	0.777027	0.556962	812.751	1.32286	0.7	0.622857
812.793	1.16974	0.539823	0.629921	812.793	0.904219	0.373832	0.530387	812.793	1.1617	0.54902	0.612676	812.793	1.16785	0.543689	0.624161	812.793	1.2098	0.510417	0.699387	812.793	1.16468	0.480769	0.683908	812.793	1.32364	0.587786	0.735849	812.793	1.37188	0.675676	0.696202	812.793	1.25524	0.586667	0.668571
812.835	1.35761	0.672566	0.685039	812.835	1.21392	0.64486	0.569061	812.835	1.35653	0.715686	0.640845	812.835	1.40301	0.718447	0.684564	812.835	1.46907	0.708333	0.760736	812.835	1.47414	0.75	0.724138	812.835	1.61597	0.854962	0.761006	812.835	1.58168	0.79054	0.791139	812.835	1.55905	0.793333	0.765714
812.878	1.39008	0.681416	0.708661	812.878	1.46466	0.663551	0.801105	812.878	1.50318	0.686275	0.816901	812.878	1.50811	0.68932	0.818792	812.878	1.53042	0.708333	0.822086	812.878	1.59693	0.798077	0.798851	812.878	1.66004	0.748092	0.91195	812.878	1.85392	0.891892	0.962025	812.878	1.70857	0.76	0.948571
812.92	1.21873	0.769911	0.448819	812.92	1.2891	0.747664	0.541436	812.92	1.25891	0.794118	0.464789	812.92	1.51222	0.941747	0.57047	812.92	1.57311	0.916667	0.656442	812.92	1.45181	0.923077	0.528736	812.92	1.43896	0.885496	0.553459	812.92	1.54807	0.95946	0.588608	812.92	1.40952	0.866667	0.542857
812.962	1.45809	0.584071	0.874016	812.962	1.16859	0.317757	0.850829	812.962	1.52182	0.627451	0.894366	812.962	1.35636	0.436893	0.919463	812.962	1.31109	0.458333	0.852761	812.962	1.45424	0.557692	0.896552	812.962	1.61021	0.679389	0.930818	812.962	1.67148	0.70946	0.962025	812.962	1.6181	0.606667	1.01143
813.004	1.04968	0.522124	0.527559	813.004	0.983219	0.485981	0.497238	813.004	0.970588	0.470588	0.5	813.004	1.1313	0.533981	0.597315	813.004	1.10493	0.479167	0.625767	813.004	1.06897	0.5	0.568966	813.004	1.24682	0.580153	0.666667	813.004	1.30816	0.668919	0.63924	813.004	1.26476	0.613333	0.651429
813.046	1.2682	0.504425	0.763779	813.046	1.0759	0.401869	0.674033	813.046	1.34479	0.54902	0.795775	813.046	1.21841	0.446602	0.771812	813.046	1.32509	0.552083	0.773006	813.046	1.26404	0.413461	0.850575	813.046	1.41034	0.580153	0.830189	813.046	1.53301	0.621622	0.911392	813.046	1.50952	0.566667	0.942857
813.089	1.38227	0.610619	0.771653	813.089	1.30149	0.588785	0.712707	813.089	1.41163	0.686275	0.725352	813.089	1.35961	0.621359	0.738255	813.089	1.41699	0.65625	0.760736	813.089	1.43722	0.615385	0.821839	813.089	1.62547	0.694657	0.930818	813.089	1.68209	0.777027	0.905063	813.089	1.66381	0.806667	0.857143
813.131	0.929761	0.362832	0.566929	813.131	0.876181	0.345794	0.530387	813.131	1.01339	0.372549	0.640845	813.131	1.0679	0.524272	0.543624	813.131	1.16072	0.510417	0.650307	813.131	1.04587	0.471154	0.574713	813.131	1.14307	0.526717	0.616352	813.131	1.18611	0.54054	0.64557	813.131	1.20286	0.54	0.662857
813.173	1.14605	0.610619	0.535433	813.173	1.24831	0.728972	0.519337	813.173	1.25518	0.705882	0.549296	813.173	1.28592	0.708738	0.577181	813.173	1.33525	0.770833	0.564417	813.173	1.43214	0.788462	0.643678	813.173	1.30875	0.717557	0.591195	813.173	1.61256	0.878378	0.734177	813.173	1.43429	0.84	0.594286
813.215	1.40966	0.787611	0.622047	813.215	1.20246	0.616822	0.585635	813.215	1.41535	0.77451	0.640845	813.215	1.43741	0.786408	0.651007	813.215	1.45124	0.739583	0.711657	813.215	1.42429	0.740385	0.683908	813.215	1.56925	0.839695	0.72956	813.215	1.62521	0.878378	0.746835	813.215	1.53905	0.853333	0.685714
813.257	1.33607	0.548673	0.787402	813.257	1.23142	0.457944	0.773481	813.257	1.45291	0.607843	0.84507	813.257	1.41246	0.553398	0.85906	813.257	1.48575	0.614583	0.871166	813.257	1.39478	0.538462	0.856322	813.257	1.58193	0.625954	0.955975	813.257	1.70484	0.736487	0.968354	813.257	1.57333	0.613333	0.96
813.3	1.45899	0.663717	0.795276	813.3	1.31595	0.570094	0.745856	813.3	1.4554	0.666667	0.788732	813.3	1.41402	0.601942	0.812081	813.3	1.44095	0.625	0.815951	813.3	1.53128	0.663462	0.867816	813.3	1.66767	0.755725	0.91195	813.3	1.70997	0.817568	0.892405	813.3	1.5619	0.693333	0.868571
813.342	1.09985	0.548673	0.551181	813.342	1.06609	0.485981	0.58011	813.342	1.20064	0.637255	0.56338	813.342	1.34932	0.718447	0.630872	813.342	1.34024	0.708333	0.631902	813.342	1.21496	0.605769	0.609195	813.342	1.30472	0.694657	0.610063	813.342	1.50231	0.736487	0.765823	813.342	1.31143	0.66	0.651429
813.384	1.36262	0.575221	0.787402	813.384	1.16807	0.53271	0.635359	813.384	1.28542	0.588235	0.697183	813.384	1.32834	0.650486	0.677852	813.384	1.44153	0.65625	0.785276	813.384	1.3109	0.644231	0.666667	813.384	1.49388	0.625954	0.867924	813.384	1.60315	0.72973	0.873418	813.384	1.54	0.74	0.8
813.426	0.77235	0.292035	0.480315	813.426	0.825167	0.383178	0.441989	813.426	0.914803	0.372549	0.542254	813.426	0.854434	0.398058	0.456376	813.426	0.888484	0.385417	0.503068	813.426	0.905504	0.336539	0.568966	813.426	0.986797	0.389313	0.597484	813.426	1.06192	0.378378	0.683544	813.426	1.10476	0.453333	0.651429
813.468	1.31817	0.743363	0.574803	813.468	1.33459	0.71028	0.624309	813.468	1.39851	0.764706	0.633803	813.468	1.52538	0.76699	0.758389	813.468	1.5193	0.770833	0.748466	813.468	1.46463	0.769231	0.695402	813.468	1.55802	0.847328	0.710692	813.468	1.62607	0.891892	0.734177	813.468	1.6381	0.866667	0.771429
813.511	1.29364	0.663717	0.629921	813.511	1.21774	0.654206	0.563536	813.511	1.3158	0.696078	0.619718	813.511	1.27393	0.669903	0.604027	813.511	1.49604	0.729167	0.766871	813.511	1.4569	0.75	0.706897	813.511	1.43319	0.709924	0.72327	813.511	1.59648	0.824324	0.772152	813.511	1.49333	0.773333	0.72
813.553	1.15804	0.433628	0.72441	813.553	1.21645	0.691589	0.524862	813.553	1.27258	0.617647	0.65493	813.553	1.26807	0.737864	0.530201	813.553	1.31269	0.65625	0.656442	813.553	1.41457	0.701923	0.712644	813.553	1.43728	0.625954	0.811321	813.553	1.56055	0.756757	0.803798	813.553	1.55619	0.733333	0.822857
813.595	1.62316	0.867257	0.755906	813.595	1.52497	0.757009	0.767956	813.595	1.65824	0.911765	0.746479	813.595	1.73441	0.92233	0.812081	813.595	1.65599	0.864583	0.791411	813.595	1.70844	0.903846	0.804598	813.595	1.82616	0.977099	0.849057	813.595	1.8688	1.02703	0.841772	813.595	1.78476	0.973333	0.811428
813.637	1.22786	0.495575	0.732283	813.637	1.03723	0.401869	0.635359	813.637	1.34024	0.607843	0.732394	813.637	1.24311	0.504854	0.738255	813.637	1.27844	0.572917	0.705522	813.637	1.15694	0.461539	0.695402	813.637	1.42561	0.59542	0.830189	813.637	1.56175	0.675676	0.886076	813.637	1.37333	0.533333	0.84
813.679	1.13539	0.442478	0.692913	813.679	1.19017	0.53271	0.657458	813.679	1.29978	0.539216	0.760563	813.679	1.3028	0.524272	0.778524	813.679	1.28885	0.583333	0.705522	813.679	1.12599	0.384615	0.741379	813.679	1.34658	0.503817	0.842767	813.679	1.51232	0.594595	0.917721	813.679	1.46857	0.56	0.908571
813.722	1.20814	0.530973	0.677165	813.722	1.11153	0.570094	0.541436	813.722	1.22632	0.578431	0.647887	813.722	1.26266	0.61165	0.651007	813.722	1.17657	0.59375	0.582822	813.722	1.19938	0.538462	0.660919	813.722	1.37933	0.618321	0.761006	813.722	1.50564	0.689189	0.816456	813.722	1.49619	0.713333	0.782857
813.764	1.4776	0.761062	0.716535	813.764	1.5687	0.850467	0.718232	813.764	1.55164	0.833333	0.71831	813.764	1.76054	0.941747	0.818792	813.764	1.88714	0.979167	0.907975	813.764	1.74105	0.913462	0.827586	813.764	1.74219	0.89313	0.849057	813.764	1.82022	0.95946	0.86076	813.764	1.88381	0.986667	0.897143
813.806	1.06752	0.39823	0.669291	813.806	1.07544	0.495327	0.58011	813.806	1.23088	0.519608	0.711268	813.806	1.11859	0.514563	0.604027	813.806	1.19127	0.614583	0.576687	813.806	1.08985	0.451923	0.637931	813.806	1.31826	0.557252	0.761006	813.806	1.44526	0.635135	0.810127	813.806	1.35429	0.6	0.754286
813.848	1.49139	0.743363	0.748031	813.848	1.24707	0.64486	0.60221	813.848	1.45609	0.794118	0.661972	813.848	1.55451	0.796117	0.758389	813.848	1.5524	0.791667	0.760736	813.848	1.5683	0.826923	0.741379	813.848	1.63258	0.877863	0.754717	813.848	1.70245	0.898649	0.803798	813.848	1.74952	0.926667	0.822857
813.89	1.0832	0.469027	0.614173	813.89	0.724945	0.205607	0.519337	813.89	1.15093	0.460784	0.690141	813.89	1.11774	0.446602	0.671141	813.89	1.09266	0.479167	0.613497	813.89	0.990053	0.403846	0.586207	813.89	1.22392	0.557252	0.666667	813.89	1.28866	0.560811	0.727848	813.89	1.18286	0.52	0.662857
813.933	1.24556	0.513274	0.732283	813.933	1.16213	0.504673	0.657458	813.933	1.52154	0.676471	0.84507	813.933	1.35147	0.660194	0.691275	813.933	1.284	0.541667	0.742331	813.933	1.42595	0.673077	0.752873	813.933	1.52576	0.664122	0.861635	813.933	1.66772	0.75	0.917721	813.933	1.59619	0.733333	0.862857
813.975	0.997422	0.619469	0.377953	813.975	1.17266	0.719626	0.453039	813.975	1.09473	0.686275	0.408451	813.975	1.17925	0.68932	0.489933	813.975	1.18871	0.697917	0.490797	813.975	1.22491	0.701923	0.522988	813.975	1.28446	0.793893	0.490566	813.975	1.25214	0.783784	0.468354	813.975	1.21238	0.726667	0.485714
814.017	1.03993	0.433628	0.606299	814.017	0.858316	0.383178	0.475138	814.017	1.14789	0.5	0.647887	814.017	1.09103	0.533981	0.557047	814.017	1.17485	0.5	0.674847	814.017	1.11306	0.509615	0.603448	814.017	1.14489	0.465649	0.679245	814.017	1.39839	0.594595	0.803798	814.017	1.31048	0.573333	0.737143
814.059	1.13922	0.548673	0.590551	814.059	1.15655	0.626168	0.530387	814.059	1.19663	0.598039	0.598592	814.059	1.25008	0.679612	0.57047	814.059	1.36037	0.802083	0.558282	814.059	1.31145	0.788462	0.522988	814.059	1.30606	0.70229	0.603774	814.059	1.43945	0.743243	0.696202	814.059	1.54	0.86	0.68
814.101	1.03393	0.522124	0.511811	814.101	1.09026	0.626168	0.464088	814.101	0.981635	0.509804	0.471831	814.101	1.1397	0.669903	0.469799	814.101	1.17587	0.666667	0.509203	814.101	1.11351	0.625	0.488506	814.101	1.25623	0.633588	0.622641	814.101	1.30944	0.689189	0.620253	814.101	1.35333	0.713333	0.64
814.144	1.31238	0.619469	0.692913	814.144	1.15408	0.457944	0.696133	814.144	1.35957	0.676471	0.683099	814.144	1.24396	0.572816	0.671141	814.144	1.47763	0.729167	0.748466	814.144	1.37798	0.653846	0.724138	814.144	1.5284	0.78626	0.742138	814.144	1.56355	0.804054	0.759494	814.144	1.50286	0.8	0.702857
814.186	0.972963	0.469027	0.503937	814.186	0.97852	0.542056	0.436464	814.186	1.10508	0.598039	0.507042	814.186	1.10901	0.592233	0.516779	814.186	1.21268	0.666667	0.546012	814.186	1.13064	0.596154	0.534483	814.186	1.15474	0.557252	0.597484	814.186	1.23135	0.655405	0.575949	814.186	1.16286	0.66	0.502857
814.228	1.45404	0.690265	0.763779	814.228	1.3066	0.560748	0.745856	814.228	1.62814	0.754902	0.873239	814.228	1.55881	0.679612	0.879195	814.228	1.46549	0.625	0.840491	814.228	1.53912	0.711538	0.827586	814.228	1.64881	0.755725	0.893082	814.228	1.76317	0.858108	0.905063	814.228	1.69048	0.793333	0.897143
814.27	0.904954	0.566372	0.338583	814.27	1.04482	0.542056	0.502762	814.27	1.0261	0.617647	0.408451	814.27	1.12172	0.61165	0.510067	814.27	1.13848	0.635417	0.503068	814.27	1.12876	0.605769	0.522988	814.27	1.17624	0.679389	0.496855	814.27	1.30277	0.783784	0.518987	814.27	1.26095	0.746667	0.514286
814.312	1.26026	0.575221	0.685039	814.312	1.27005	0.579439	0.690608	814.312	1.42695	0.715686	0.711268	814.312	1.34319	0.61165	0.731544	814.312	1.32809	0.604167	0.723926	814.312	1.4065	0.596154	0.810345	814.312	1.4512	0.633588	0.81761	814.312	1.62213	0.72973	0.892405	814.312	1.48286	0.66	0.822857
814.354	1.66852	0.778761	0.889764	814.354	1.3334	0.504673	0.828729	814.354	1.6113	0.745098	0.866197	814.354	1.57223	0.679612	0.892617	814.354	1.54697	0.71875	0.828221	814.354	1.51978	0.663462	0.856322	814.354	1.68923	0.770992	0.918239	814.354	1.8227	0.898649	0.924051	814.354	1.74	0.78	0.96
814.397	1.14313	0.584071	0.559055	814.397	1.11835	0.53271	0.585635	814.397	1.2781	0.637255	0.640845	814.397	1.39102	0.679612	0.711409	814.397	1.32924	0.666667	0.662577	814.397	1.40318	0.730769	0.672414	814.397	1.48889	0.740458	0.748428	814.397	1.63616	0.851351	0.78481	814.397	1.42476	0.733333	0.691429
814.439	1.59578	0.690265	0.905512	814.439	1.14096	0.317757	0.823204	814.439	1.45719	0.598039	0.859155	814.439	1.46315	0.543689	0.919463	814.439	1.31237	0.416667	0.895706	814.439	1.39854	0.519231	0.87931	814.439	1.696	0.70229	0.993711	814.439	1.72845	0.70946	1.01899	814.439	1.59333	0.593333	1
814.481	1.33203	0.654867	0.677165	814.481	1.35116	0.71028	0.640884	814.481	1.53659	0.754902	0.78169	814.481	1.65303	0.854369	0.798658	814.481	1.59522	0.895833	0.699387	814.481	1.62389	0.836538	0.787356	814.481	1.6708	0.80916	0.861635	814.481	1.74042	0.898649	0.841772	814.481	1.72476	0.913333	0.811428
814.523	1.32618	0.60177	0.72441	814.523	1.17272	0.598131	0.574586	814.523	1.39229	0.617647	0.774648	814.523	1.36561	0.640777	0.724832	814.523	1.34151	0.666667	0.674847	814.523	1.40694	0.711538	0.695402	814.523	1.53699	0.656489	0.880503	814.523	1.57569	0.695946	0.879747	814.523	1.58476	0.733333	0.851429
814.565	0.962999	0.59292	0.370079	814.565	0.81959	0.504673	0.314917	814.565	0.985363	0.598039	0.387324	814.565	1.11885	0.68932	0.42953	814.565	1.15133	0.666667	0.484663	814.565	1.1387	0.701923	0.436782	814.565	1.1605	0.732824	0.427673	814.565	1.30363	0.797297	0.506329	814.565	1.21048	0.753333	0.457143
814.608	0.890252	0.504425	0.385827	814.608	0.775856	0.411215	0.364641	814.608	0.864954	0.470588	0.394366	814.608	0.822441	0.446602	0.375839	814.608	0.997508	0.53125	0.466258	814.608	0.860079	0.480769	0.37931	814.608	1.03793	0.572519	0.465409	814.608	1.15284	0.614865	0.537975	814.608	1.09905	0.613333	0.485714
814.65	1.36262	0.575221	0.787402	814.65	1.28662	0.579439	0.707182	814.65	1.44035	0.588235	0.852113	814.65	1.44843	0.669903	0.778524	814.65	1.38145	0.614583	0.766871	814.65	1.44496	0.634615	0.810345	814.65	1.6322	0.732824	0.899371	814.65	1.75633	0.75	1.00633	814.65	1.66667	0.746667	0.92
814.692	1.1441	0.59292	0.551181	814.692	1.0584	0.588785	0.469613	814.692	1.22729	0.656863	0.570423	814.692	1.19268	0.68932	0.503356	814.692	1.31998	0.71875	0.601227	814.692	1.26492	0.644231	0.62069	814.692	1.33617	0.694657	0.641509	814.692	1.50701	0.810811	0.696202	814.692	1.40952	0.746667	0.662857
814.734	1.25719	0.690265	0.566929	814.734	1.15826	0.616822	0.541436	814.734	1.3198	0.735294	0.584507	814.734	1.36646	0.708738	0.657718	814.734	1.49048	0.760417	0.730061	814.734	1.39169	0.730769	0.660919	814.734	1.46997	0.847328	0.622641	814.734	1.44672	0.858108	0.588608	814.734	1.36381	0.786667	0.577143
814.776	0.872761	0.274336	0.598425	814.776	0.74534	0.214953	0.530387	814.776	1.05565	0.372549	0.683099	814.776	0.869877	0.252427	0.61745	814.776	0.832247	0.21875	0.613497	814.776	0.895557	0.240385	0.655172	814.776	1.0807	0.351145	0.72956	814.776	1.16909	0.371622	0.797468	814.776	1.02571	0.3	0.725714
814.819	1.14215	0.575221	0.566929	814.819	1.02742	0.485981	0.541436	814.819	1.14582	0.617647	0.528169	814.819	1.25894	0.621359	0.637584	814.819	1.25876	0.614583	0.644172	814.819	1.24005	0.653846	0.586207	814.819	1.29617	0.717557	0.578616	814.819	1.48674	0.79054	0.696202	814.819	1.37905	0.693333	0.685714
814.861	1.12654	0.433628	0.692913	814.861	0.875768	0.317757	0.558011	814.861	1.0388	0.362745	0.676056	814.861	1.07448	0.436893	0.637584	814.861	1.14047	0.520833	0.619632	814.861	1.10732	0.509615	0.597701	814.861	1.32186	0.541985	0.779874	814.861	1.42704	0.547297	0.879747	814.861	1.36476	0.553333	0.811428
814.903	1.14814	0.486726	0.661417	814.903	1.09201	0.495327	0.596685	814.903	1.16777	0.470588	0.697183	814.903	1.30078	0.669903	0.630872	814.903	1.35992	0.666667	0.693252	814.903	1.22635	0.576923	0.649425	814.903	1.50598	0.694657	0.811321	814.903	1.54447	0.702703	0.841772	814.903	1.48857	0.74	0.748571
814.945	1.31322	0.769911	0.543307	814.945	1.12088	0.579439	0.541436	814.945	1.27782	0.686275	0.591549	814.945	1.38959	0.718447	0.671141	814.945	1.46223	0.78125	0.680982	814.945	1.38771	0.692308	0.695402	814.945	1.5041	0.862595	0.641509	814.945	1.54251	0.871622	0.670886	814.945	1.53333	0.853333	0.68
814.987	1.27399	0.628319	0.645669	814.987	1.20246	0.616822	0.585635	814.987	1.3198	0.735294	0.584507	814.987	1.45084	0.786408	0.66443	814.987	1.50275	0.760417	0.742331	814.987	1.46298	0.836538	0.626437	814.987	1.59532	0.80916	0.786164	814.987	1.62436	0.864865	0.759494	814.987	1.48952	0.826667	0.662857
815.029	1.16974	0.539823	0.629921	815.029	1.09754	0.495327	0.60221	815.029	1.2741	0.598039	0.676056	815.029	1.20968	0.592233	0.61745	815.029	1.31212	0.625	0.687117	815.029	1.32051	0.653846	0.666667	815.029	1.49249	0.725191	0.767296	815.029	1.59434	0.79054	0.803798	815.029	1.52571	0.76	0.765714
815.072	1.0685	0.40708	0.661417	815.072	1.04188	0.46729	0.574586	815.072	1.20947	0.568627	0.640845	815.072	1.25067	0.572816	0.677852	815.072	1.27473	0.59375	0.680982	815.072	1.26271	0.567308	0.695402	815.072	1.44222	0.618321	0.823899	815.072	1.4947	0.716216	0.778481	815.072	1.37143	0.6	0.771429
815.114	0.92565	0.539823	0.385827	815.114	1.24149	0.766355	0.475138	815.114	1.09473	0.686275	0.408451	815.114	1.25249	0.796117	0.456376	815.114	1.29473	0.791667	0.503068	815.114	1.22336	0.798077	0.425287	815.114	1.29795	0.763359	0.534591	815.114	1.45304	0.858108	0.594937	815.114	1.44762	0.853333	0.594286
815.156	0.96502	0.539823	0.425197	815.156	0.961946	0.542056	0.41989	815.156	1.13325	0.598039	0.535211	815.156	1.09943	0.669903	0.42953	815.156	1.19542	0.729167	0.466258	815.156	1.06576	0.663462	0.402299	815.156	1.22473	0.740458	0.484277	815.156	1.34707	0.783784	0.563291	815.156	1.22571	0.7	0.525714
815.198	1.33991	0.654867	0.685039	815.198	1.20803	0.495327	0.712707	815.198	1.49185	0.696078	0.795775	815.198	1.51411	0.708738	0.805369	815.198	1.42069	0.635417	0.785276	815.198	1.3529	0.605769	0.747127	815.198	1.56032	0.717557	0.842767	815.198	1.66986	0.783784	0.886076	815.198	1.57714	0.72	0.857143
815.24	1.32806	0.690265	0.637795	815.24	1.34058	0.616822	0.723757	815.24	1.44049	0.813725	0.626761	815.24	1.54779	0.796117	0.751678	815.24	1.62474	0.833333	0.791411	815.24	1.51426	0.721154	0.793103	815.24	1.59484	0.877863	0.716981	815.24	1.76112	0.925676	0.835443	815.24	1.61905	0.853333	0.765714
815.283	1.40171	0.858407	0.543307	815.283	1.46843	0.794392	0.674033	815.283	1.55813	0.931373	0.626761	815.283	1.65387	0.92233	0.731544	815.283	1.72335	0.96875	0.754601	815.283	1.59925	0.903846	0.695402	815.283	1.61683	0.931298	0.685535	815.283	1.75274	0.993243	0.759494	815.283	1.71143	0.98	0.731429
815.325	0.774162	0.451327	0.322835	815.325	0.99463	0.635514	0.359116	815.325	0.893814	0.598039	0.295775	815.325	1.16296	0.76699	0.395973	815.325	1.28547	0.84375	0.441718	815.325	1.15053	0.788462	0.362069	815.325	1.18071	0.740458	0.440252	815.325	1.27326	0.817568	0.455696	815.325	1.21238	0.806667	0.405714
815.367	1.75995	0.893805	0.866142	815.367	1.69448	0.88785	0.80663	815.367	1.79881	0.960784	0.838028	815.367	1.78739	0.941747	0.845638	815.367	1.85775	0.9375	0.920245	815.367	1.83897	0.971154	0.867816	815.367	1.94969	1	0.949685	815.367	2.13342	1.10811	1.02532	815.367	1.96	1	0.96
815.409	1.05658	0.513274	0.543307	815.409	1.14292	0.700935	0.441989	815.409	1.15866	0.588235	0.570423	815.409	1.22851	0.718447	0.510067	815.409	1.34196	0.802083	0.539877	815.409	1.28073	0.769231	0.511494	815.409	1.31864	0.70229	0.616352	815.409	1.39514	0.743243	0.651899	815.409	1.4381	0.826667	0.611429
815.452	0.792906	0.40708	0.385827	815.452	1.01756	0.691589	0.325967	815.452	0.94739	0.588235	0.359155	815.452	1.00847	0.679612	0.328859	815.452	1.15305	0.760417	0.392638	815.452	1.04664	0.673077	0.373563	815.452	1.10663	0.641221	0.465409	815.452	1.27275	0.70946	0.563291	815.452	1.26476	0.813333	0.451429
815.494	1.15114	0.442478	0.708661	815.494	1.23943	0.626168	0.61326	815.494	1.24869	0.607843	0.640845	815.494	1.27237	0.621359	0.651007	815.494	1.3458	0.677083	0.668712	815.494	1.21485	0.576923	0.637931	815.494	1.41437	0.603054	0.811321	815.494	1.57527	0.689189	0.886076	815.494	1.49619	0.673333	0.822857
815.536	0.982928	0.345133	0.637795	815.536	0.757629	0.299065	0.458564	815.536	1.05413	0.392157	0.661972	815.536	0.871571	0.38835	0.483222	815.536	1.01904	0.479167	0.539877	815.536	1.00343	0.394231	0.609195	815.536	1.15613	0.458015	0.698113	815.536	1.35315	0.47973	0.873418	815.536	1.21619	0.473333	0.742857
815.578	1.18821	0.778761	0.409449	815.578	1.2466	0.738318	0.508287	815.578	1.1802	0.764706	0.415493	815.578	1.41741	0.873786	0.543624	815.578	1.4407	0.833333	0.607362	815.578	1.40771	0.913462	0.494253	815.578	1.36708	0.870229	0.496855	815.578	1.44595	0.945946	0.5	815.578	1.47238	0.906667	0.565714
815.62	0.998537	0.486726	0.511811	815.62	1.11236	0.626168	0.486188	815.62	1.16418	0.607843	0.556338	815.62	1.32703	0.776699	0.550336	815.62	1.3217	0.8125	0.509203	815.62	1.1597	0.682692	0.477011	815.62	1.28542	0.656489	0.628931	815.62	1.46185	0.797297	0.664557	815.62	1.4	0.76	0.64
815.663	1.23552	0.707965	0.527559	815.663	1.38896	0.775701	0.61326	815.663	1.35474	0.784314	0.570423	815.663	1.55763	0.893204	0.66443	815.663	1.60992	0.916667	0.693252	815.663	1.49392	0.913462	0.58046	815.663	1.53464	0.89313	0.641509	815.663	1.75992	1.00676	0.753165	815.663	1.67905	1.03333	0.645714
815.705	1.04278	0.530973	0.511811	815.705	1.05117	0.598131	0.453039	815.705	1.10936	0.588235	0.521127	815.705	1.27921	0.708738	0.57047	815.705	1.24764	0.677083	0.570552	815.705	1.22491	0.701923	0.522988	815.705	1.35321	0.755725	0.597484	815.705	1.43654	0.797297	0.63924	815.705	1.40476	0.753333	0.651429
815.747	1.15887	0.584071	0.574803	815.747	1.26148	0.747664	0.513812	815.747	1.2683	0.627451	0.640845	815.747	1.37786	0.854369	0.52349	815.747	1.50562	0.916667	0.588957	815.747	1.43424	0.836538	0.597701	815.747	1.55984	0.78626	0.773585	815.747	1.64035	0.817568	0.822785	815.747	1.59429	0.88	0.714286
815.789	1.18445	0.60177	0.582677	815.789	0.926783	0.280374	0.646409	815.789	1.15714	0.607843	0.549296	815.789	1.11631	0.485437	0.630872	815.789	1.13804	0.5	0.638037	815.789	1.19551	0.528846	0.666667	815.789	1.28945	0.679389	0.610063	815.789	1.393	0.70946	0.683544	815.789	1.28952	0.666667	0.622857
815.831	1.28674	0.672566	0.614173	815.831	1.23473	0.682243	0.552486	815.831	1.32256	0.745098	0.577465	815.831	1.49938	0.834951	0.66443	815.831	1.64174	0.979167	0.662577	815.831	1.46684	0.846154	0.62069	815.831	1.58903	0.80916	0.779874	815.831	1.6708	0.898649	0.772152	815.831	1.74667	0.946667	0.8
815.873	1.18939	0.575221	0.614173	815.873	1.00361	0.495327	0.508287	815.873	1.28818	0.598039	0.690141	815.873	1.23953	0.601942	0.637584	815.873	1.30713	0.6875	0.619632	815.873	1.34008	0.759615	0.58046	815.873	1.5091	0.748092	0.761006	815.873	1.63864	0.79054	0.848101	815.873	1.4619	0.753333	0.708571
815.916	1.20424	0.495575	0.708661	815.916	1.18635	0.523365	0.662983	815.916	1.38829	0.578431	0.809859	815.916	1.20141	0.543689	0.657718	815.916	1.3318	0.583333	0.748466	815.916	1.2742	0.567308	0.706897	815.916	1.36454	0.534351	0.830189	815.916	1.62795	0.621622	1.00633	815.916	1.56952	0.626667	0.942857
815.958	1.1186	0.504425	0.614173	815.958	1.04823	0.523365	0.524862	815.958	1.16418	0.607843	0.556338	815.958	1.31804	0.747573	0.57047	815.958	1.37877	0.802083	0.576687	815.958	1.42451	0.798077	0.626437	815.958	1.36358	0.671756	0.691824	815.958	1.57997	0.763513	0.816456	815.958	1.3619	0.733333	0.628571
816	1.7727	0.938053	0.834646	816	1.59973	0.831776	0.767956	816	1.83955	0.980392	0.859155	816	1.92702	1.06796	0.85906	816	1.8148	0.9375	0.877301	816	2.03504	1.14423	0.890805	816	2.07274	1.0916	0.981132	816	2.14651	1.11486	1.03165	816	2.19524	1.20667	0.988571
816.042	1.1933	0.610619	0.582677	816.042	1.2479	0.700935	0.546961	816.042	1.23861	0.647059	0.591549	816.042	1.43155	0.854369	0.577181	816.042	1.4621	0.885417	0.576687	816.042	1.42661	0.846154	0.58046	816.042	1.53512	0.824427	0.710692	816.042	1.68936	0.891892	0.797468	816.042	1.67524	0.926667	0.748571
816.084	1.3921	0.628319	0.763779	816.084	1.4345	0.616822	0.81768	816.084	1.70353	0.872549	0.830986	816.084	1.62677	0.747573	0.879195	816.084	1.65114	0.822917	0.828221	816.084	1.59295	0.759615	0.833333	816.084	1.65778	0.770992	0.886792	816.084	1.99324	0.993243	1	816.084	1.81619	0.833333	0.982857
816.127	1.23085	0.451327	0.779528	816.127	1.10817	0.46729	0.640884	816.127	1.29702	0.529412	0.767606	816.127	1.21698	0.485437	0.731544	816.127	1.29186	0.635417	0.656442	816.127	1.37577	0.576923	0.798851	816.127	1.44673	0.572519	0.874214	816.127	1.73777	0.756757	0.981013	816.127	1.59905	0.673333	0.925714
816.169	1.40088	0.707965	0.692913	816.169	1.27005	0.579439	0.690608	816.169	1.49282	0.77451	0.71831	816.169	1.56793	0.796117	0.771812	816.169	1.40957	0.697917	0.711657	816.169	1.52807	0.826923	0.701149	816.169	1.66043	0.89313	0.767296	816.169	1.74128	0.912162	0.829114	816.169	1.71714	0.9	0.817143
816.211	1.41955	0.734513	0.685039	816.211	1.27898	0.560748	0.718232	816.211	1.53231	0.764706	0.767606	816.211	1.59093	0.718447	0.872483	816.211	1.61688	0.739583	0.877301	816.211	1.59306	0.788462	0.804598	816.211	1.65956	0.816794	0.842767	816.211	1.89831	0.993243	0.905063	816.211	1.78381	0.886667	0.897143
816.253	1.49927	0.743363	0.755906	816.253	1.54959	0.803738	0.745856	816.253	1.67109	0.882353	0.788732	816.253	1.77468	0.92233	0.852349	816.253	1.7192	0.854167	0.865031	816.253	1.84671	0.990385	0.856322	816.253	1.78664	0.931298	0.855346	816.253	2.04225	1.06757	0.974684	816.253	2.04476	1.03333	1.01143
816.295	1.04376	0.539823	0.503937	816.295	0.933908	0.514019	0.41989	816.295	1.08824	0.588235	0.5	816.295	1.25093	0.747573	0.503356	816.295	1.29173	0.739583	0.552147	816.295	1.26183	0.836538	0.425287	816.295	1.3788	0.793893	0.584906	816.295	1.61512	0.918919	0.696202	816.295	1.48476	0.913333	0.571429
816.338	1.08208	0.60177	0.480315	816.338	0.95988	0.401869	0.558011	816.338	1.12345	0.588235	0.535211	816.338	1.08888	0.592233	0.496644	816.338	1.21396	0.625	0.588957	816.338	1.2689	0.682692	0.586207	816.338	1.43406	0.78626	0.647799	816.338	1.54584	0.824324	0.721519	816.338	1.36952	0.786667	0.582857
816.38	1.25622	0.681416	0.574803	816.38	1.12088	0.579439	0.541436	816.38	1.3042	0.754902	0.549296	816.38	1.31948	0.708738	0.610738	816.38	1.4561	0.78125	0.674847	816.38	1.43999	0.836538	0.603448	816.38	1.45557	0.908397	0.54717	816.38	1.69107	0.918919	0.772152	816.38	1.68095	0.926667	0.754286
816.422	1.15295	0.60177	0.551181	816.422	1.12723	0.635514	0.491713	816.422	1.21472	0.637255	0.577465	816.422	1.34717	0.776699	0.57047	816.422	1.48479	0.895833	0.588957	816.422	1.49204	0.923077	0.568966	816.422	1.39138	0.793893	0.597484	816.422	1.6383	0.885135	0.753165	816.422	1.70476	0.973333	0.731429
816.464	1.32416	0.654867	0.669291	816.464	1.27598	0.607477	0.668508	816.464	1.44504	0.754902	0.690141	816.464	1.43214	0.747573	0.684564	816.464	1.45424	0.791667	0.662577	816.464	1.44916	0.730769	0.718391	816.464	1.48125	0.732824	0.748428	816.464	1.65301	0.817568	0.835443	816.464	1.55429	0.84	0.714286
816.506	1.21392	0.654867	0.559055	816.506	1.32478	0.794392	0.530387	816.506	1.33969	0.705882	0.633803	816.506	1.27478	0.737864	0.536913	816.506	1.48236	0.875	0.607362	816.506	1.57239	0.894231	0.678161	816.506	1.55264	0.816794	0.735849	816.506	1.72733	0.891892	0.835443	816.506	1.74667	0.946667	0.8
816.548	1.10487	0.451327	0.653543	816.548	1.13621	0.495327	0.640884	816.548	1.17978	0.588235	0.591549	816.548	1.26481	0.553398	0.711409	816.548	1.32496	0.65625	0.668712	816.548	1.27045	0.586538	0.683908	816.548	1.40808	0.603054	0.805031	816.548	1.69646	0.804054	0.892405	816.548	1.58667	0.706667	0.88
816.591	1.3105	0.530973	0.779528	816.591	1.23432	0.654206	0.58011	816.591	1.50166	0.705882	0.795775	816.591	1.44484	0.76699	0.677852	816.591	1.47207	0.760417	0.711657	816.591	1.55305	0.846154	0.706897	816.591	1.63397	0.778626	0.855346	816.591	1.97802	0.952703	1.02532	816.591	1.88286	0.9	0.982857
816.633	1.29956	0.646018	0.653543	816.633	1.38302	0.747664	0.635359	816.633	1.49006	0.764706	0.725352	816.633	1.51795	0.786408	0.731544	816.633	1.61976	0.895833	0.723926	816.633	1.61273	0.923077	0.689655	816.633	1.67617	0.839695	0.836478	816.633	1.81851	0.932432	0.886076	816.633	1.79905	0.953333	0.845714
816.675	1.17657	0.60177	0.574803	816.675	1.28228	0.785047	0.497238	816.675	1.23557	0.686275	0.549296	816.675	1.4397	0.815534	0.624161	816.675	1.55285	0.927083	0.625767	816.675	1.49392	0.913462	0.58046	816.675	1.60968	0.854962	0.754717	816.675	1.84554	0.95946	0.886076	816.675	1.64476	0.873333	0.771429
816.717	0.893248	0.460177	0.433071	816.717	0.885062	0.448598	0.436464	816.717	0.976112	0.490196	0.485916	816.717	1.10914	0.679612	0.42953	816.717	1.13107	0.677083	0.453988	816.717	1.229	0.769231	0.45977	816.717	1.30693	0.778626	0.528302	816.717	1.60708	0.891892	0.71519	816.717	1.43619	0.773333	0.662857
816.76	1.55244	0.725664	0.826772	816.76	1.58527	0.850467	0.734807	816.76	1.7259	0.901961	0.823944	816.76	1.83964	0.980583	0.85906	816.76	1.8295	0.958333	0.871166	816.76	2.02343	1.11539	0.908046	816.76	1.88636	0.961832	0.924528	816.76	2.22203	1.10811	1.11392	816.76	2.2219	1.15333	1.06857
816.802	1.3498	0.60177	0.748031	816.802	1.45572	0.682243	0.773481	816.802	1.44408	0.676471	0.767606	816.802	1.51867	0.76699	0.751678	816.802	1.65171	0.854167	0.797546	816.802	1.55482	0.807692	0.747127	816.802	1.72423	0.862595	0.861635	816.802	1.96074	0.97973	0.981013	816.802	1.8619	0.913333	0.948571
816.844	1.66455	0.814159	0.850394	816.844	1.53219	0.747664	0.78453	816.844	1.72742	0.882353	0.84507	816.844	1.77839	0.912621	0.865772	816.844	1.76885	0.885417	0.883436	816.844	1.96375	1.03846	0.925287	816.844	2.01344	1.07634	0.937107	816.844	2.29379	1.14189	1.1519	816.844	2.18762	1.07333	1.11429
816.886	0.89924	0.371681	0.527559	816.886	0.771622	0.373832	0.39779	816.886	0.939934	0.411765	0.528169	816.886	1.04333	0.553398	0.489933	816.886	0.990797	0.5	0.490797	816.886	0.977011	0.5	0.477011	816.886	1.07974	0.48855	0.591195	816.886	1.47947	0.675676	0.803798	816.886	1.45714	0.72	0.737143
816.928	1.39572	0.946903	0.448819	816.928	1.47818	0.831776	0.646409	816.928	1.67854	1.05882	0.619718	816.928	1.80094	1.02913	0.771812	816.928	1.79199	1.03125	0.760736	816.928	1.86848	1.17308	0.695402	816.928	1.6334	1.06107	0.572327	816.928	1.99179	1.27027	0.721519	816.928	2.02476	1.25333	0.771429
816.971	1.50226	0.699115	0.80315	816.971	1.55894	0.813084	0.745856	816.971	1.63891	0.843137	0.795775	816.971	1.61263	0.76699	0.845638	816.971	1.69709	0.875	0.822086	816.971	1.62345	0.721154	0.902299	816.971	1.79385	0.900763	0.893082	816.971	2.17302	1.03378	1.13924	816.971	2.02857	0.96	1.06857
817.013	1.38116	0.743363	0.637795	817.013	1.3286	0.803738	0.524862	817.013	1.46437	0.823529	0.640845	817.013	1.47182	0.854369	0.61745	817.013	1.59522	0.895833	0.699387	817.013	1.57825	0.923077	0.655172	817.013	1.67929	0.89313	0.786164	817.013	2.03635	1.07432	0.962025	817.013	1.97905	1.05333	0.925714
817.055	1.10376	0.584071	0.519685	817.055	1.13487	0.654206	0.480663	817.055	1.17247	0.637255	0.535211	817.055	1.38372	0.786408	0.597315	817.055	1.49649	0.864583	0.631902	817.055	1.39202	0.817308	0.574713	817.055	1.52883	0.824427	0.704403	817.055	1.87462	0.918919	0.955696	817.055	1.83619	0.973333	0.862857
817.097	1.26395	0.823009	0.440945	817.097	1.2258	0.700935	0.524862	817.097	1.3361	0.843137	0.492958	817.097	1.49365	0.990291	0.503356	817.097	1.59509	1	0.595092	817.097	1.52675	0.980769	0.545977	817.097	1.62576	1.05343	0.572327	817.097	1.87008	1.0473	0.822785	817.097	1.87905	1.11333	0.765714
817.139	1.20229	0.477876	0.72441	817.139	0.975216	0.317757	0.657458	817.139	1.20574	0.480392	0.725352	817.139	1.18114	0.456311	0.724832	817.139	1.17056	0.489583	0.680982	817.139	1.30084	0.519231	0.781609	817.139	1.45168	0.564886	0.886792	817.139	1.69124	0.621622	1.06962	817.139	1.58381	0.646667	0.937143
817.182	1.39098	0.761062	0.629921	817.182	1.23984	0.654206	0.585635	817.182	1.57553	0.843137	0.732394	817.182	1.62546	0.873786	0.751678	817.182	1.75645	0.989583	0.766871	817.182	1.69131	0.932692	0.758621	817.182	1.8504	1.00763	0.842767	817.182	2.11016	1.04054	1.06962	817.182	2.00857	1.06	0.948571
817.224	1.34876	0.663717	0.685039	817.224	1.48882	0.803738	0.685083	817.224	1.63767	0.813725	0.823944	817.224	1.77624	0.970874	0.805369	817.224	1.86433	1.07292	0.791411	817.224	1.7605	0.990385	0.770115	817.224	1.84819	0.923664	0.924528	817.224	2.17893	1.02703	1.1519	817.224	2.1219	1.09333	1.02857
817.266	1.51899	0.707965	0.811024	817.266	1.40858	0.607477	0.801105	817.266	1.62814	0.754902	0.873239	817.266	1.62162	0.796117	0.825503	817.266	1.71121	0.864583	0.846626	817.266	1.78305	0.875	0.908046	817.266	1.84195	0.816794	1.02516	817.266	2.25949	1	1.25949	817.266	2.08857	0.94	1.14857
817.308	0.668943	0.353982	0.314961	817.308	0.891413	0.504673	0.38674	817.308	0.854598	0.558824	0.295775	817.308	1.05017	0.640777	0.409396	817.308	1.03534	0.697917	0.337423	817.308	1.06775	0.682692	0.385057	817.308	1.14297	0.740458	0.402516	817.308	1.54961	0.783784	0.765823	817.308	1.36	0.76	0.6
817.35	1.28974	0.628319	0.661417	817.35	1.25512	0.691589	0.563536	817.35	1.57249	0.882353	0.690141	817.35	1.58533	0.961165	0.624161	817.35	1.57253	0.885417	0.687117	817.35	1.61284	0.951923	0.660919	817.35	1.67435	0.900763	0.773585	817.35	2.16755	1.0473	1.12025	817.35	2.00952	1.02667	0.982857
817.392	1.36834	0.769911	0.598425	817.392	1.42893	0.738318	0.690608	817.392	1.60039	0.931373	0.669014	817.392	1.75539	0.990291	0.765101	817.392	1.64302	0.9375	0.705522	817.392	1.78758	1.05769	0.729885	817.392	1.78299	1.05343	0.72956	817.392	2.2778	1.18919	1.08861	817.392	2.07714	1.1	0.977143
817.435	1.2257	0.690265	0.535433	817.435	1.39913	0.841121	0.558011	817.435	1.34314	0.843137	0.5	817.435	1.54134	0.970874	0.57047	817.435	1.6289	0.947917	0.680982	817.435	1.4748	0.923077	0.551724	817.435	1.65951	0.923664	0.735849	817.435	2.13556	1.14189	0.993671	817.435	1.91429	1.04	0.874286
817.477	1.26897	0.725664	0.543307	817.477	1.38767	0.813084	0.574586	817.477	1.43593	0.872549	0.56338	817.477	1.60403	1	0.604027	817.477	1.55585	0.979167	0.576687	817.477	1.70126	1.02885	0.672414	817.477	1.66398	0.984733	0.679245	817.477	2.24658	1.19595	1.05063	817.477	2.06667	1.10667	0.96
817.519	1.58776	0.831858	0.755906	817.519	1.64517	0.915888	0.729282	817.519	1.6947	0.941176	0.753521	817.519	1.89346	1.06796	0.825503	817.519	1.91584	1.09375	0.822086	817.519	1.9947	1.11539	0.87931	817.519	1.92947	0.992366	0.937107	817.519	2.54371	1.29054	1.25317	817.519	2.42762	1.23333	1.19429
817.561	1.03784	0.557522	0.480315	817.561	1.24449	0.719626	0.524862	817.561	1.29743	0.705882	0.591549	817.561	1.42184	0.84466	0.577181	817.561	1.39034	0.875	0.515337	817.561	1.62058	0.971154	0.649425	817.561	1.64693	0.923664	0.72327	817.561	2.1507	1.08108	1.06962	817.561	2.00286	0.98	1.02286
817.603	1.11936	0.725664	0.393701	817.603	1.496	0.915888	0.58011	817.603	1.3557	0.862745	0.492958	817.603	1.68756	1.00971	0.677852	817.603	1.65945	1.05208	0.607362	817.603	1.72259	1.09615	0.626437	817.603	1.65183	1.0229	0.628931	817.603	2.30021	1.24324	1.05696	817.603	2.09714	1.2	0.897143
817.646	1.54637	0.884956	0.661417	817.646	1.69866	1.04673	0.651934	817.646	1.82919	1.06863	0.760563	817.646	1.91673	1.16505	0.751678	817.646	2.02058	1.22917	0.791411	817.646	2.09118	1.29808	0.793103	817.646	2.0206	1.15267	0.867924	817.646	2.66781	1.35135	1.31646	817.646	2.55333	1.35333	1.2
817.688	1.34367	0.831858	0.511811	817.688	1.34135	0.794392	0.546961	817.688	1.57774	0.95098	0.626761	817.688	1.66072	1.00971	0.651007	817.688	1.69996	1.03125	0.668712	817.688	1.83576	1.13461	0.701149	817.688	1.75068	0.977099	0.773585	817.688	2.44193	1.18243	1.25949	817.688	2.27143	1.18	1.09143
817.73	1.78357	0.893805	0.889764	817.73	1.69835	0.775701	0.922652	817.73	1.99972	1.04902	0.950704	817.73	1.94774	0.961165	0.986577	817.73	1.878	0.927083	0.95092	817.73	2.2553	1.13461	1.12069	817.73	2.26545	1.1145	1.15094	817.73	2.88334	1.25676	1.62658	817.73	2.63429	1.16	1.47429
817.772	1.24256	0.557522	0.685039	817.772	1.29762	0.700935	0.596685	817.772	1.5446	0.833333	0.711268	817.772	1.3486	0.737864	0.610738	817.772	1.7399	0.979167	0.760736	817.772	1.78161	1	0.781609	817.772	1.76062	0.854962	0.90566	817.772	2.47178	1.05405	1.41772	817.772	2.24571	1.04	1.20571
817.814	1.70685	0.840708	0.866142	817.814	1.86611	1.03738	0.828729	817.814	1.94463	1.07843	0.866197	817.814	2.00013	1.08738	0.912752	817.814	2.17938	1.30208	0.877301	817.814	2.33267	1.32692	1.00575	817.814	2.21062	1.1603	1.05031	817.814	2.91379	1.33784	1.57595	817.814	2.7381	1.32667	1.41143
817.857	1.28277	0.707965	0.574803	817.857	1.41617	0.747664	0.668508	817.857	1.65065	1.0098	0.640845	817.857	1.73369	0.941747	0.791946	817.857	1.73434	1.01042	0.723926	817.857	2.07748	1.22115	0.856322	817.857	1.86341	1.0458	0.81761	817.857	2.60443	1.25	1.35443	817.857	2.33048	1.15333	1.17714
817.899	1.3397	0.867257	0.472441	817.899	1.4535	0.906542	0.546961	817.899	1.47459	1.0098	0.464789	817.899	1.77051	1.12621	0.644295	817.899	1.92114	1.27083	0.650307	817.899	2.06079	1.36539	0.695402	817.899	1.82294	1.1374	0.685535	817.899	2.47289	1.37162	1.10127	817.899	2.28	1.24	1.04
817.941	1.22667	0.699115	0.527559	817.941	1.19817	0.700935	0.497238	817.941	1.44173	0.843137	0.598592	817.941	1.52707	0.902913	0.624161	817.941	1.57797	0.958333	0.619632	817.941	1.82394	1.04808	0.775862	817.941	1.68289	0.877863	0.805031	817.941	2.3895	1.05405	1.33544	817.941	2.1419	0.993333	1.14857
817.983	1.52185	0.80531	0.716535	817.983	1.54959	0.803738	0.745856	817.983	1.71279	0.980392	0.732394	817.983	1.88148	1.02913	0.852349	817.983	1.90484	1.05208	0.852761	817.983	2.12688	1.11539	1.01149	817.983	2.07682	1.00763	1.06918	817.983	2.7896	1.17568	1.61392	817.983	2.61905	1.13333	1.48571
818.025	1.58275	0.929203	0.653543	818.025	1.4944	0.682243	0.812155	818.025	1.84176	1.08824	0.753521	818.025	1.8732	0.980583	0.892617	818.025	1.92325	1.05208	0.871166	818.025	2.04045	1.05769	0.982759	818.025	2.12799	1.08397	1.04402	818.025	2.78036	1.22973	1.55063	818.025	2.5619	1.21333	1.34857
818.067	1.58581	0.814159	0.771653	818.067	1.53431	0.766355	0.767956	818.067	1.83927	1.02941	0.809859	818.067	1.82479	1.01942	0.805369	818.067	1.9391	1.13542	0.803681	818.067	2.09052	1.125	0.965517	818.067	2.19987	1.09924	1.10063	818.067	2.89719	1.17568	1.72152	818.067	2.54952	1.12667	1.42286
818.11	1.47655	0.823009	0.653543	818.11	1.71524	1.04673	0.668508	818.11	1.82035	1.13725	0.683099	818.11	1.95556	1.20388	0.751678	818.11	2.0671	1.3125	0.754601	818.11	2.27155	1.375	0.896552	818.11	2.28916	1.32061	0.968553	818.11	2.9096	1.37162	1.53798	818.11	2.83143	1.42	1.41143
818.152	1.31224	0.761062	0.551181	818.152	1.42206	0.897196	0.524862	818.152	1.65189	1.03922	0.612676	818.152	1.75109	1.1068	0.644295	818.152	1.92798	1.19792	0.730061	818.152	2.05449	1.22115	0.833333	818.152	2.06016	1.0916	0.968553	818.152	2.8369	1.22297	1.61392	818.152	2.43714	1.14	1.29714
818.194	1.32611	0.672566	0.653543	818.194	1.36557	0.813084	0.552486	818.194	1.63712	0.911765	0.725352	818.194	1.65244	0.961165	0.691275	818.194	1.77403	1.16667	0.607362	818.194	2.03338	1.21154	0.821839	818.194	2.08133	0.961832	1.1195	818.194	2.96091	1.18243	1.77848	818.194	2.49333	1.09333	1.4
818.236	1.84552	0.955752	0.889764	818.236	1.79222	0.897196	0.895028	818.236	2.25007	1.36275	0.887324	818.236	2.17176	1.16505	1.00671	818.236	2.13114	1.125	1.00614	818.236	2.43756	1.20192	1.23563	818.236	2.47832	1.25191	1.22642	818.236	3.45989	1.46622	1.99367	818.236	2.93429	1.34	1.59429
818.279	1.71758	0.938053	0.779528	818.279	1.65751	0.878505	0.779006	818.279	1.94988	1.14706	0.802817	818.279	2.06066	1.17476	0.885906	818.279	2.03969	1.15625	0.883436	818.279	2.3477	1.25	1.0977	818.279	2.39882	1.22901	1.16981	818.279	3.42696	1.44595	1.98101	818.279	3.01238	1.28667	1.72571
818.321	1.73333	0.938053	0.795276	818.321	1.7599	0.953271	0.80663	818.321	1.95264	1.15686	0.795775	818.321	2.01968	1.19417	0.825503	818.321	2.17082	1.28125	0.889571	818.321	2.30935	1.24039	1.06897	818.321	2.40151	1.24428	1.15723	818.321	3.26788	1.43243	1.83544	818.321	2.96476	1.31333	1.65143
818.363	1.52665	0.920354	0.606299	818.363	1.63371	0.88785	0.745856	818.363	1.92392	1.2549	0.669014	818.363	1.98827	1.13592	0.852349	818.363	1.95137	1.13542	0.815951	818.363	2.35919	1.25	1.10919	818.363	2.29147	1.19084	1.10063	818.363	3.21639	1.41892	1.79747	818.363	2.73619	1.23333	1.50286
818.405	1.37328	0.743363	0.629921	818.405	1.48753	0.841121	0.646409	818.405	1.68586	1.0098	0.676056	818.405	1.76523	1.08738	0.677852	818.405	1.75332	1.04167	0.711657	818.405	2.15374	1.125	1.02874	818.405	2.17024	1.03817	1.13207	818.405	3.20878	1.39865	1.81013	818.405	2.83238	1.22667	1.60571
818.447	1.21079	0.840708	0.370079	818.447	1.4535	0.906542	0.546961	818.447	1.6066	1.07843	0.528169	818.447	1.76621	1.24272	0.52349	818.447	1.65746	1.16667	0.490797	818.447	2.12555	1.26923	0.856322	818.447	1.98646	1.1374	0.849057	818.447	3.05354	1.44595	1.6076	818.447	2.61048	1.31333	1.29714
818.489	1.43433	0.725664	0.708661	818.489	1.51433	0.785047	0.729282	818.489	1.78597	0.990196	0.795775	818.489	1.80609	0.980583	0.825503	818.489	1.81282	1.05208	0.760736	818.489	2.25508	1.07692	1.17816	818.489	2.14873	0.91603	1.2327	818.489	3.38086	1.31757	2.06329	818.489	2.90857	1.16	1.74857
818.532	1.62804	0.911504	0.716535	818.532	1.86358	0.990654	0.872928	818.532	2.03259	1.21569	0.816901	818.532	2.22715	1.30097	0.926175	818.532	2.18737	1.29167	0.895706	818.532	2.64512	1.375	1.27012	818.532	2.43209	1.16794	1.26415	818.532	3.56705	1.45946	2.10759	818.532	3.15714	1.38	1.77714
818.574	1.4815	0.79646	0.685039	818.574	1.72076	1.04673	0.674033	818.574	1.85957	1.17647	0.683099	818.574	1.95641	1.27184	0.684564	818.574	1.97265	1.29167	0.680982	818.574	2.47458	1.36539	1.10919	818.574	2.45273	1.21374	1.23899	818.574	3.40378	1.47973	1.92405	818.574	3.21238	1.48667	1.72571
818.616	1.4176	0.716814	0.700787	818.616	1.92467	1.26168	0.662983	818.616	1.85032	1.06863	0.78169	818.616	2.04978	1.37864	0.671141	818.616	2.12589	1.39583	0.730061	818.616	2.53979	1.38461	1.15517	818.616	2.49724	1.14504	1.3522	818.616	3.57929	1.4527	2.12658	818.616	3.15333	1.35333	1.8
818.658	1.55202	1.15044	0.401575	818.658	1.93954	1.27103	0.668508	818.658	2.0116	1.44118	0.570423	818.658	2.13944	1.49515	0.644295	818.658	2.24233	1.5	0.742331	818.658	2.58057	1.52885	1.05172	818.658	2.54021	1.49618	1.04402	818.658	3.76018	1.81081	1.94937	818.658	3.18571	1.66	1.52571
818.7	1.74817	0.858407	0.889764	818.7	1.76966	0.990654	0.779006	818.7	2.03065	1.05882	0.971831	818.7	1.99642	1.09709	0.899329	818.7	1.99617	1.125	0.871166	818.7	2.66346	1.16346	1.5	818.7	2.44476	0.954198	1.49057	818.7	3.85982	1.38514	2.47468	818.7	3.3019	1.23333	2.06857
818.743	1.41739	0.929203	0.488189	818.743	1.89023	1.29906	0.59116	818.743	1.7567	1.18627	0.570423	818.743	1.99081	1.33981	0.651007	818.743	2.01674	1.35417	0.662577	818.743	2.82007	1.53846	1.28161	818.743	2.50708	1.23664	1.27044	818.743	3.64557	1.5	2.14557	818.743	3.31619	1.53333	1.78286
818.785	1.53063	0.884956	0.645669	818.785	1.86689	1.21495	0.651934	818.785	2.03107	1.23529	0.795775	818.785	2.08406	1.35922	0.724832	818.785	2.07509	1.30208	0.773006	818.785	2.89699	1.61539	1.28161	818.785	2.60142	1.23664	1.36478	818.785	3.94774	1.57432	2.37342	818.785	3.39524	1.52667	1.86857
818.827	1.6594	1.0531	0.606299	818.827	2.19657	1.46729	0.729282	818.827	2.06145	1.34314	0.71831	818.827	2.29152	1.46602	0.825503	818.827	2.39871	1.55208	0.846626	818.827	3.15595	1.70192	1.45402	818.827	2.63911	1.34351	1.2956	818.827	4.05884	1.72973	2.32911	818.827	3.52286	1.62	1.90286
818.869	1.98516	1.07965	0.905512	818.869	2.22084	1.36449	0.856354	818.869	2.32905	1.34314	0.985915	818.869	2.47273	1.46602	1.00671	818.869	2.33148	1.34375	0.98773	818.869	3.22082	1.63461	1.58621	818.869	2.99265	1.35115	1.64151	818.869	4.38291	1.75	2.63291	818.869	3.74286	1.56	2.18286
818.911	2.19762	1.22124	0.976378	818.911	2.4741	1.42991	1.0442	818.911	2.43841	1.43137	1.00704	818.911	2.52114	1.42718	1.09396	818.911	2.59516	1.44792	1.14724	818.911	3.20093	1.44231	1.75862	818.911	3.24058	1.47328	1.7673	818.911	4.47109	1.74324	2.72785	818.911	3.95333	1.55333	2.4
818.954	2.05191	1.25664	0.795276	818.954	2.51908	1.60748	0.911602	818.954	2.43786	1.52941	0.908451	818.954	2.68847	1.62136	1.06711	818.954	2.63114	1.625	1.00614	818.954	3.25332	1.61539	1.63793	818.954	3.11522	1.51145	1.60377	818.954	4.21878	1.75676	2.46203	818.954	3.82476	1.69333	2.13143
818.996	1.53348	0.982301	0.551181	818.996	2.16895	1.46729	0.701658	818.996	2.1668	1.39216	0.774648	818.996	2.20871	1.43689	0.771812	818.996	2.25588	1.45833	0.797546	818.996	3.08079	1.58654	1.49425	818.996	2.90773	1.40458	1.50314	818.996	4.12547	1.68243	2.44304	818.996	3.41905	1.57333	1.84571
819.038	1.87785	1.1062	0.771653	819.038	2.28203	1.39252	0.889503	819.038	2.39713	1.5098	0.887324	819.038	2.37206	1.46602	0.90604	819.038	2.389	1.46875	0.920245	819.038	3.24746	1.58654	1.66092	819.038	3.10581	1.45802	1.6478	819.038	4.38633	1.80405	2.58228	819.038	3.69143	1.6	2.09143
819.08	2.11288	1.30973	0.80315	819.08	2.40781	1.42991	0.977901	819.08	2.56835	1.61765	0.950704	819.08	2.57953	1.57282	1.00671	819.08	2.65881	1.57292	1.08589	819.08	3.46043	1.67308	1.78736	819.08	3.31197	1.55725	1.75472	819.08	4.71305	1.96622	2.74683	819.08	3.96476	1.71333	2.25143
819.122	2.34311	1.39823	0.944882	819.122	2.77999	1.69159	1.0884	819.122	2.94601	1.83333	1.11268	819.122	2.84968	1.70874	1.14094	819.122	2.91437	1.79167	1.1227	819.122	3.93822	1.875	2.06322	819.122	3.6659	1.70992	1.95598	819.122	4.99205	2.07432	2.91772	819.122	4.14952	1.76667	2.38286
819.165	2.55759	1.48673	1.07087	819.165	3.14623	1.92523	1.22099	819.165	3.01367	1.82353	1.19014	819.165	3.11468	1.8932	1.22148	819.165	3.16207	1.91667	1.2454	819.165	4.12257	1.99039	2.13218	819.165	3.93629	1.81679	2.1195	819.165	5.25539	2.13514	3.12025	819.165	4.46095	1.94667	2.51429
819.207	2.32033	1.54867	0.771653	819.207	3.01064	1.97196	1.03867	819.207	2.83527	1.9902	0.84507	819.207	2.95817	1.95146	1.00671	819.207	2.9853	1.97917	1.00614	819.207	3.99458	2.08654	1.90805	819.207	3.7467	1.84733	1.89937	819.207	4.96468	2.14189	2.82279	819.207	4.05524	1.86667	2.18857
819.249	2.32144	1.41593	0.905512	819.249	2.90189	1.84112	1.06077	819.249	2.9797	1.85294	1.12676	819.249	2.88623	1.71845	1.16779	819.249	3.00326	1.84375	1.15951	819.249	3.98033	1.86539	2.11494	819.249	3.75846	1.66412	2.09434	819.249	5.07296	1.9527	3.12025	819.249	4.27238	1.78667	2.48571
819.291	2.4314	1.69911	0.732283	819.291	2.95838	1.92523	1.03315	819.291	3.04847	2.14706	0.901408	819.291	3.16779	2	1.16779	819.291	3.33845	2.16667	1.17178	819.291	4.15948	2.125	2.03448	819.291	3.76019	1.81679	1.9434	819.291	5.06304	2.19595	2.86709	819.291	4.20381	1.94667	2.25714
819.333	2.23573	1.49558	0.740158	819.333	3.04332	2.06542	0.977901	819.333	2.94242	1.97059	0.971831	819.333	3.04242	1.94175	1.10067	819.333	3.16437	2.04167	1.1227	819.333	4.19419	2.18269	2.01149	819.333	3.74944	1.75572	1.99371	819.333	5.02882	2.15541	2.87342	819.333	4.25524	1.94667	2.30857
819.375	2.68344	1.62832	1.05512	819.375	3.45722	2.15888	1.29834	819.375	3.30378	2.07843	1.22535	819.375	3.27901	2.07767	1.20134	819.375	3.49853	2.19792	1.30061	819.375	4.62931	2.25	2.37931	819.375	4.23275	1.89313	2.33962	819.375	5.461	2.28378	3.17721	819.375	4.68952	2.02667	2.66286
819.418	2.6725	1.74336	0.929134	819.418	3.40967	2.05607	1.35359	819.418	3.36937	2.18628	1.1831	819.418	3.2205	1.84466	1.37584	819.418	3.33129	2	1.33129	819.418	4.50431	2.125	2.37931	819.418	4.11911	1.85496	2.26415	819.418	5.25171	2.27703	2.97468	819.418	4.47619	1.93333	2.54286
819.46	2.40994	1.50442	0.905512	819.46	3.43719	2.29907	1.13812	819.46	3.14485	2.03922	1.10563	819.46	2.99902	1.84466	1.15436	819.46	3.3072	2.13542	1.17178	819.46	4.37025	2.13462	2.23563	819.46	4.01719	1.74046	2.27673	819.46	5.07099	2.12162	2.94937	819.46	4.50476	2.01333	2.49143
819.502	2.91053	1.90265	1.00787	819.502	3.84468	2.45794	1.38674	819.502	3.653	2.34314	1.30986	819.502	3.56187	2.23301	1.32886	819.502	3.8681	2.5	1.3681	819.502	4.93866	2.49038	2.44828	819.502	4.43665	2.01527	2.42138	819.502	5.3729	2.39189	2.98101	819.502	4.88762	2.25333	2.63429
819.544	2.27503	1.56637	0.708661	819.544	3.31946	2.30841	1.01105	819.544	2.94214	2.01961	0.922535	819.544	2.81397	1.76699	1.04698	819.544	3.04723	2.01042	1.03681	819.544	4.30703	2.13462	2.17241	819.544	3.86264	1.75572	2.10692	819.544	4.79165	2.10811	2.68354	819.544	4.17238	1.84667	2.32571
819.587	2.5132	1.58407	0.929134	819.587	3.76481	2.41121	1.35359	819.587	3.29522	2.09804	1.19718	819.587	3.19307	1.95146	1.24161	819.587	3.61497	2.30208	1.31288	819.587	4.73674	2.28846	2.44828	819.587	4.19506	1.78626	2.40881	819.587	5.10392	2.14189	2.96203	819.587	4.44095	1.88667	2.55429
819.629	2.54059	1.76106	0.779528	819.629	3.51836	2.30841	1.20995	819.629	3.36578	2.32353	1.04225	819.629	3.38268	2.08738	1.2953	819.629	3.53534	2.19792	1.33742	819.629	4.72745	2.36538	2.36207	819.629	4.0953	1.8626	2.2327	819.629	4.99726	2.25676	2.74051	819.629	4.29905	2.01333	2.28571
819.671	3.24995	2.0531	1.19685	819.671	4.19053	2.68224	1.50829	819.671	4.05551	2.64706	1.40845	819.671	3.9394	2.36893	1.57047	819.671	3.99508	2.51042	1.48466	819.671	5.37401	2.61538	2.75862	819.671	4.61674	2.14504	2.4717	819.671	5.61136	2.45946	3.1519	819.671	5.01048	2.23333	2.77714
819.713	3.24507	2.00885	1.23622	819.713	4.26576	2.66355	1.60221	819.713	4.00801	2.57843	1.42958	819.713	3.71011	2.12621	1.58389	819.713	3.9136	2.41667	1.49693	819.713	5.31012	2.44231	2.86782	819.713	4.53954	1.99237	2.54717	819.713	5.49778	2.36486	3.13291	819.713	4.8581	2.12667	2.73143
819.755	2.98223	2.0531	0.929134	819.755	4.10513	2.63551	1.46961	819.755	3.89602	2.70588	1.19014	819.755	3.63126	2.26214	1.36913	819.755	3.8233	2.51042	1.31288	819.755	5.22038	2.51923	2.70115	819.755	4.41553	2.03817	2.37736	819.755	5.22135	2.2973	2.92405	819.755	4.63905	2.23333	2.40571
819.798	3.43586	2.16814	1.26772	819.798	4.28409	2.53271	1.75138	819.798	4.27934	2.66667	1.61268	819.798	3.928	2.2233	1.7047	819.798	3.98722	2.41667	1.57055	819.798	5.40573	2.39423	3.01149	819.798	4.71026	1.96183	2.74843	819.798	5.67961	2.33784	3.34177	819.798	5.00952	2.18667	2.82286
819.84	3.05296	2.19469	0.858268	819.84	4.33025	2.91589	1.41437	819.84	3.76857	2.57843	1.19014	819.84	3.59399	2.27184	1.32215	819.84	3.89622	2.58333	1.31288	819.84	5.16678	2.52885	2.63793	819.84	4.363	1.9542	2.40881	819.84	5.27164	2.39189	2.87975	819.84	4.88286	2.46	2.42286
819.882	3.69131	2.62832	1.06299	819.882	5.07683	3.21495	1.86188	819.882	4.40168	2.95098	1.4507	819.882	4.35603	2.71845	1.63758	819.882	4.55656	2.90625	1.65031	819.882	5.78294	2.84615	2.93678	819.882	4.87316	2.35114	2.52201	819.882	5.85298	2.77703	3.07595	819.882	5.31714	2.62	2.69714
819.924	3.96091	2.71681	1.24409	819.924	5.31177	3.41121	1.90055	819.924	4.57871	3.02941	1.5493	819.924	4.52023	2.81553	1.7047	819.924	4.61848	2.9375	1.68098	819.924	5.85024	2.91346	2.93678	819.924	4.97647	2.36641	2.61006	819.924	5.93483	2.77027	3.16456	819.924	5.50762	2.67333	2.83429
819.966	3.94718	2.66372	1.28347	819.966	5.18258	3.39252	1.79005	819.966	4.4902	2.9902	1.5	819.966	4.54493	2.87379	1.67114	819.966	4.44383	2.78125	1.66258	819.966	5.71574	2.80769	2.90805	819.966	4.85122	2.19084	2.66038	819.966	5.7216	2.60135	3.12025	819.966	5.26952	2.60667	2.66286
820.008	4.25399	2.9469	1.30709	820.008	5.65038	3.64486	2.00553	820.008	4.87614	3.23529	1.64085	820.008	5.04952	3.20388	1.84564	820.008	4.82509	3.05208	1.77301	820.008	6.04056	3.08654	2.95402	820.008	5.06673	2.45038	2.61635	820.008	5.99059	2.85135	3.13924	820.008	5.38762	2.87333	2.51429
820.051	4.28646	2.95575	1.33071	820.051	5.86415	3.65421	2.20994	820.051	5.08533	3.35294	1.73239	820.051	5.006	3.01942	1.98658	820.051	4.85148	3.04167	1.80982	820.051	6.04973	2.98077	3.06896	820.051	5.03894	2.32824	2.71069	820.051	5.95005	2.81081	3.13924	820.051	5.25048	2.71333	2.53714
820.093	4.21357	3.00885	1.20472	820.093	6.13941	3.96262	2.17679	820.093	5.04004	3.39216	1.64789	820.093	4.88519	3.01942	1.86577	820.093	4.80982	3	1.80982	820.093	6.10212	3.15385	2.94828	820.093	4.92482	2.35878	2.56604	820.093	5.90541	2.90541	3	820.093	5.32571	2.84	2.48571
820.135	4.63083	3.07965	1.55118	820.135	6.31368	3.91589	2.39779	820.135	5.2491	3.28431	1.96479	820.135	5.07611	3.02913	2.04698	820.135	5.0324	3.09375	1.93865	820.135	5.96518	2.91346	3.05172	820.135	5.04657	2.33588	2.71069	820.135	6.20886	3	3.20886	820.135	5.43048	2.77333	2.65714
820.177	5.0862	3.42478	1.66142	820.177	6.73475	4.1215	2.61326	820.177	5.56311	3.54902	2.01409	820.177	5.34925	3.17476	2.1745	820.177	5.4499	3.33333	2.11657	820.177	6.48751	3.24038	3.24713	820.177	5.40717	2.63359	2.77359	820.177	6.43106	3.31081	3.12025	820.177	5.6019	3.05333	2.54857
820.219	4.95234	3.42478	1.52756	820.219	6.96417	4.31776	2.64641	820.219	5.34438	3.37255	1.97183	820.219	5.37024	3.24272	2.12752	820.219	5.4175	3.23958	2.17791	820.219	6.46872	3.33654	3.13218	820.219	5.16151	2.48855	2.67296	820.219	6.26317	3.35811	2.90506	820.219	5.32095	2.88667	2.43429
820.262	4.74281	3.30973	1.43307	820.262	6.76403	4.23365	2.53039	820.262	5.1842	3.30392	1.88028	820.262	5.1225	3.13592	1.98658	820.262	5.23415	3.16667	2.06749	820.262	6.15805	3.25	2.90805	820.262	4.87311	2.45802	2.41509	820.262	5.7246	3.14865	2.57595	820.262	4.98381	2.76667	2.21714
820.304	5.26716	3.56637	1.70079	820.304	7.35932	4.51402	2.8453	820.304	5.67481	3.47059	2.20423	820.304	5.79429	3.57281	2.22148	820.304	5.76495	3.5625	2.20245	820.304	6.59958	3.49038	3.1092	820.304	5.21268	2.56488	2.6478	820.304	6.13787	3.37838	2.75949	820.304	5.44095	3.00667	2.43429
820.346	5.14891	3.70797	1.44094	820.346	7.01472	4.37383	2.64088	820.346	5.41577	3.45098	1.96479	820.346	5.61667	3.47573	2.14094	820.346	5.53866	3.48958	2.04908	820.346	6.51569	3.59615	2.91954	820.346	4.89779	2.52672	2.37107	820.346	5.75727	3.36486	2.39241	820.346	4.99333	2.87333	2.12
820.388	6.20842	4.24779	1.96063	820.388	8.28089	5.06542	3.21547	820.388	6.53342	4.06863	2.46479	820.388	6.55021	3.91262	2.63758	820.388	6.38663	3.89583	2.4908	820.388	7.5389	4.15385	3.38506	820.388	5.86163	3	2.86164	820.388	6.65942	3.91892	2.74051	820.388	6.0419	3.41333	2.62857
820.43	6.30096	4.23009	2.07087	820.43	8.25032	4.99065	3.25967	820.43	6.55054	4.02941	2.52113	820.43	6.26207	3.71845	2.54362	820.43	6.03304	3.57292	2.46012	820.43	7.13008	3.95192	3.17816	820.43	5.68155	2.87023	2.81132	820.43	6.40318	3.77027	2.63291	820.43	5.7	3.14	2.56
820.473	6.33322	4.45133	1.88189	820.473	9.1136	5.71028	3.40332	820.473	6.74758	4.30392	2.44366	820.473	6.31075	3.85437	2.45638	820.473	6.37992	3.86458	2.51534	820.473	7.2153	4.19231	3.02299	820.473	5.76816	3.07634	2.69182	820.473	6.10366	3.83784	2.26582	820.473	5.51333	3.27333	2.24
820.515	6.54477	4.51327	2.0315	820.515	9.44545	5.85981	3.58563	820.515	7.10439	4.47059	2.6338	820.515	6.37701	3.78641	2.5906	820.515	6.49521	3.90625	2.58896	820.515	7.43402	4.27885	3.15517	820.515	5.59028	3.03053	2.55975	820.515	6.19988	3.85811	2.34177	820.515	5.56	3.28	2.28
820.557	7.00502	4.90266	2.10236	820.557	10.0428	6.28037	3.76243	820.557	7.55316	4.81372	2.73944	820.557	6.74197	3.99029	2.75168	820.557	6.83666	4.125	2.71166	820.557	7.56886	4.47115	3.0977	820.557	5.73306	3.19847	2.53459	820.557	6.30978	4.09459	2.21519	820.557	5.72381	3.46667	2.25714
820.599	7.1802	4.92035	2.25984	820.599	9.86606	6.15888	3.70718	820.599	7.41922	4.58824	2.83099	820.599	6.59849	3.78641	2.81208	820.599	6.62091	3.95833	2.66258	820.599	7.11903	4.06731	3.05172	820.599	5.38687	2.83969	2.54717	820.599	6.03267	3.71622	2.31646	820.599	5.1981	3.10667	2.09143
820.641	7.52331	5.31858	2.20472	820.641	10.2888	6.47663	3.81216	820.641	7.49033	4.71569	2.77465	820.641	6.62403	3.91262	2.71141	820.641	6.66973	4.16667	2.50307	820.641	7.30382	4.29808	3.00575	820.641	5.37107	3	2.37107	820.641	5.80448	3.81081	1.99367	820.641	5.05333	3.13333	1.92
820.683	8.51279	6.00885	2.50394	820.683	11.2954	6.92523	4.37017	820.683	8.36633	5.22549	3.14085	820.683	7.52773	4.33981	3.18792	820.683	7.30553	4.48958	2.81595	820.683	8.03935	4.76923	3.27012	820.683	5.98272	3.47328	2.50943	820.683	6.44791	4.27703	2.17089	820.683	5.68667	3.56667	2.12
820.726	8.51878	5.92035	2.59843	820.726	11.4356	7.06542	4.37017	820.726	8.45664	5.19608	3.26056	820.726	7.15006	4.11651	3.03356	820.726	7.04755	4.25	2.79755	820.726	7.75917	4.64423	3.11494	820.726	5.71597	3.24428	2.4717	820.726	6.04884	3.87162	2.17721	820.726	5.4419	3.37333	2.06857
820.768	8.75479	6.13274	2.62205	820.768	12.0312	7.49533	4.53591	820.768	8.68793	5.39216	3.29577	820.768	7.39337	4.25243	3.14094	820.768	7.30624	4.41667	2.88957	820.768	7.69043	4.70192	2.98851	820.768	5.60502	3.22137	2.38365	820.768	6.01565	4.0473	1.96835	820.768	5.40667	3.56667	1.84
820.81	9.20737	6.30973	2.89764	820.81	12.3334	7.50467	4.82873	820.81	8.92958	5.5	3.42958	820.81	7.58285	4.30097	3.28188	820.81	7.24898	4.08333	3.16564	820.81	7.78238	4.70192	3.08046	820.81	5.66388	3.19847	2.46541	820.81	6.02455	4.08784	1.93671	820.81	5.49333	3.53333	1.96
820.852	9.84266	6.85841	2.98425	820.852	12.8806	8.01869	4.86188	820.852	9.14319	5.83333	3.30986	820.852	8.1197	4.75728	3.36242	820.852	7.38484	4.35417	3.03068	820.852	7.8603	5.03846	2.82184	820.852	5.59192	3.39695	2.19497	820.852	6.03284	4.41892	1.61392	820.852	5.41905	3.81333	1.60571
820.894	10.6532	7.35398	3.29921	820.894	13.517	8.46729	5.04972	820.894	9.48136	6.05882	3.42253	820.894	8.39285	4.90291	3.48993	820.894	7.47303	4.47917	2.99386	820.894	8.07482	5.02885	3.04598	820.894	5.61933	3.37405	2.24528	820.894	6.33801	4.54054	1.79747	820.894	5.53048	3.79333	1.73714
820.937	11.0762	7.61947	3.45669	820.937	14.1428	8.94393	5.1989	820.937	9.70864	6.21569	3.49296	820.937	8.44523	5.02913	3.41611	820.937	7.75799	4.73958	3.01841	820.937	8.14246	5.18269	2.95977	820.937	5.73743	3.47328	2.26415	820.937	6.42089	4.75	1.67089	820.937	5.63524	3.88667	1.74857
820.979	10.8254	7.41593	3.40945	820.979	13.7732	8.60748	5.16575	820.979	9.41301	5.94118	3.47183	820.979	8.16596	4.7767	3.38926	820.979	7.39999	4.51042	2.88957	820.979	7.5357	4.81731	2.71839	820.979	5.01027	3.12977	1.8805	820.979	5.89198	4.49324	1.39873	820.979	4.87619	3.45333	1.42286
821.021	12.2124	8.21239	4	821.021	14.8984	8.98131	5.91713	821.021	10.5579	6.48039	4.07747	821.021	9.20388	5.20388	4	821.021	8.45284	4.9375	3.51534	821.021	8.29962	5.20192	3.0977	821.021	5.60939	3.49618	2.11321	821.021	6.72032	5.08108	1.63924	821.021	5.63524	3.92667	1.70857
821.063	12.7058	8.90265	3.80315	821.063	15.5871	9.59813	5.98895	821.063	10.8181	7.02941	3.78873	821.063	9.09292	5.30097	3.79195	821.063	8.64935	5.28125	3.3681	821.063	8.37787	5.625	2.75287	821.063	5.3811	3.66412	1.71698	821.063	6.28327	5.17568	1.1076	821.063	5.40286	4.18	1.22286
821.106	13.667	9.33628	4.33071	821.106	16.2648	9.85047	6.41437	821.106	11.3043	6.98039	4.32394	821.106	9.239	5.25243	3.98658	821.106	9.07541	5.54167	3.53374	821.106	8.65407	5.71154	2.94253	821.106	5.84248	3.64122	2.20126	821.106	6.68491	5.12162	1.56329	821.106	5.57714	4.04	1.53714
821.148	14.4323	9.77876	4.65354	821.148	16.9128	10.0841	6.82873	821.148	11.9383	7.20588	4.73239	821.148	9.59927	5.31068	4.28859	821.148	9.38618	5.76042	3.62577	821.148	8.7269	5.72115	3.00575	821.148	5.92736	3.69466	2.2327	821.148	6.7051	5.04054	1.66456	821.148	5.81238	4.16667	1.64571
821.19	14.8533	10.0974	4.75591	821.19	17.7413	10.6916	7.04972	821.19	12.2755	7.35294	4.92253	821.19	10.0293	5.66019	4.36913	821.19	9.50735	6.01042	3.49693	821.19	8.8887	5.95192	2.93678	821.19	5.86077	3.92366	1.93711	821.19	6.55748	5.10811	1.44937	821.19	6.1	4.62	1.48
821.232	15.5741	10.708	4.86614	821.232	18.5652	11.1121	7.45304	821.232	12.9521	7.7549	5.19718	821.232	10.5675	5.99029	4.57718	821.232	9.75077	6.125	3.62577	821.232	9.02918	6.11538	2.91379	821.232	6.012	4.28244	1.72956	821.232	6.54413	5.2973	1.24683	821.232	5.99333	4.75333	1.24
821.274	16.3041	11.0442	5.25984	821.274	19.5207	11.8411	7.67956	821.274	13.5646	8.02941	5.53521	821.274	10.9773	6.25243	4.72483	821.274	10.167	6.40625	3.76074	821.274	9.14854	6.26923	2.87931	821.274	6.42796	4.35878	2.06918	821.274	6.75	5.25	1.5	821.274	6.23905	4.79333	1.44571
821.317	16.5303	11.2389	5.29134	821.317	19.6047	12.0467	7.55801	821.317	13.5816	8.26471	5.3169	821.317	10.864	6.32039	4.54362	821.317	10.0596	6.45833	3.60123	821.317	8.96861	6.30769	2.66092	821.317	6.12425	4.41985	1.7044	821.317	6.46947	5.31757	1.1519	821.317	5.81524	4.66667	1.14857
821.359	17.2712	11.4602	5.81102	821.359	20.0918	12.1028	7.98895	821.359	14.2628	8.60784	5.65493	821.359	11.1129	6.21359	4.89933	821.359	10.4081	6.39583	4.01227	821.359	9.41777	6.53846	2.87931	821.359	6.34303	4.41221	1.93082	821.359	6.71339	5.37162	1.34177	821.359	5.88571	4.56	1.32571
821.401	17.8141	11.885	5.92913	821.401	20.8714	12.5234	8.34807	821.401	14.8984	9.03922	5.85916	821.401	11.6347	6.53398	5.10067	821.401	10.9028	6.71875	4.18405	821.401	9.88672	6.93269	2.95402	821.401	6.58639	4.68702	1.89937	821.401	6.9858	5.67568	1.31013	821.401	6.25714	4.88	1.37714
821.443	18.7397	12.4248	6.31496	821.443	21.5602	12.8972	8.66298	821.443	15.2226	8.9902	6.23239	821.443	11.7831	6.60194	5.18121	821.443	11.1302	6.85417	4.27607	821.443	9.65385	6.65385	3	821.443	6.82539	4.68702	2.13836	821.443	7.45433	5.87838	1.57595	821.443	6.50476	4.93333	1.57143
821.485	18.9833	12.9203	6.06299	821.485	21.3676	12.9533	8.41437	821.485	14.8277	9.08823	5.73944	821.485	11.5894	6.6699	4.91946	821.485	10.8258	6.97917	3.84663	821.485	8.72911	6.29808	2.43104	821.485	6.11114	4.59542	1.51572	821.485	6.80919	5.88514	0.924051	821.485	5.86095	4.82667	1.03429
821.528	20.0605	13.5487	6.51181	821.528	22.1596	13.5794	8.58011	821.528	15.3572	9.34314	6.01408	821.528	11.8695	6.99029	4.8792	821.528	11.3272	7.33333	3.99386	821.528	9.04465	6.65385	2.3908	821.528	6.31859	4.80916	1.50943	821.528	7.22126	6.19595	1.02532	821.528	6.0581	5.08667	0.971429
821.57	21.5271	14.4248	7.10236	821.57	23.3271	14.3271	9	821.57	16.1025	9.81372	6.28873	821.57	12.2275	7.01942	5.20805	821.57	11.8761	7.48958	4.3865	821.57	9.49956	6.88462	2.61494	821.57	6.78794	5.0458	1.74214	821.57	7.65942	6.41892	1.24051	821.57	6.44667	5.32667	1.12
821.612	22.2037	14.9911	7.2126	821.612	24.0842	14.9626	9.12155	821.612	16.6594	10.2157	6.44366	821.612	12.456	7.28155	5.1745	821.612	11.8724	7.51042	4.36196	821.612	9.64445	7.20192	2.44253	821.612	6.74387	5.15267	1.59119	821.612	7.7943	6.75	1.0443	821.612	6.46762	5.39333	1.07429
821.654	22.5351	15.354	7.1811	821.654	24.4232	15.1028	9.32044	821.654	16.7191	10.3529	6.3662	821.654	12.4598	7.27184	5.18792	821.654	12.1738	7.88542	4.28834	821.654	9.54697	7.25962	2.28736	821.654	6.47794	5.10687	1.37107	821.654	7.57946	6.65541	0.924051	821.654	5.93524	5.02667	0.908571
821.696	23.8581	16.2124	7.64567	821.696	25.418	15.4953	9.92265	821.696	17.737	10.9412	6.79577	821.696	13.0977	7.53398	5.56376	821.696	12.9266	8.34375	4.58282	821.696	10.0191	7.49038	2.52874	821.696	6.59835	5.07634	1.52201	821.696	7.83313	6.76351	1.06962	821.696	6.22952	5.12667	1.10286
821.738	24.8327	16.9823	7.85039	821.738	26.3608	16.1121	10.2486	821.738	18.5178	11.5882	6.92958	821.738	13.937	8.25243	5.68456	821.738	13.0532	8.66667	4.3865	821.738	10.1951	7.91346	2.28161	821.738	6.6382	5.37405	1.26415	821.738	7.78592	6.81757	0.968354	821.738	6.14667	5.30667	0.84
821.781	25.8715	17.5487	8.32283	821.781	27.087	16.2804	10.8066	821.781	19.5034	12.1372	7.3662	821.781	14.863	8.62136	6.24161	821.781	13.3017	8.61458	4.68712	821.781	10.5637	8.11538	2.44828	821.781	7.11878	5.60305	1.51572	821.781	8.19834	7.03378	1.16456	821.781	6.52571	5.44	1.08571
821.823	26.6937	18.2212	8.47244	821.823	28.3339	17.2897	11.0442	821.823	19.7306	12.5686	7.16197	821.823	15.1725	9.14563	6.02684	821.823	13.7403	9.11458	4.62577	821.823	10.7759	8.5	2.27586	821.823	7.14249	5.80916	1.33333	821.823	8.24495	7.27027	0.974684	821.823	6.91619	5.97333	0.942857
821.865	27.6016	18.8142	8.7874	821.865	29.6354	18	11.6354	821.865	20.5616	13.0686	7.49296	821.865	15.9404	9.52427	6.41611	821.865	14.0837	9.32292	4.76074	821.865	10.9924	8.50962	2.48276	821.865	7.30376	5.83206	1.4717	821.865	8.53755	7.49324	1.0443	821.865	7.13714	6.04	1.09714
821.907	28.2784	19.1681	9.11024	821.907	30.3199	18.3364	11.9834	821.907	21.1466	13.4706	7.67606	821.907	16.0545	9.52427	6.5302	821.907	14.0456	9.36458	4.68098	821.907	11.143	8.82692	2.31609	821.907	7.28758	5.84733	1.44025	821.907	8.79003	7.68243	1.1076	821.907	7.19143	6.06	1.13143
821.949	28.848	19.4071	9.44094	821.949	31.0702	18.8879	12.1823	821.949	21.4854	13.598	7.88732	821.949	15.9351	9.48544	6.44967	821.949	14.0848	9.38542	4.69939	821.949	11.4216	9.04808	2.37356	821.949	7.37241	6.00763	1.36478	821.949	8.87624	7.84459	1.03165	821.949	7.15905	6.15333	1.00571
821.992	29.1867	19.3363	9.85039	821.992	32.1306	19.7383	12.3923	821.992	21.9212	13.7451	8.17606	821.992	15.7359	9.42718	6.30872	821.992	14.257	9.52083	4.7362	821.992	11.6491	9.41346	2.23563	821.992	7.0567	5.78626	1.27044	821.992	8.93038	8	0.93038	821.992	7.17714	6.2	0.977143
822.034	30.1301	19.823	10.3071	822.034	33.2132	20.3458	12.8674	822.034	22.9583	14.402	8.55634	822.034	16.5973	10	6.59732	822.034	14.9442	9.96875	4.97546	822.034	12.3192	9.80769	2.51149	822.034	7.5983	6.18321	1.41509	822.034	9.60546	8.46622	1.13924	822.034	7.39905	6.35333	1.04571
822.076	31.1127	20.4513	10.6614	822.076	33.5835	20.9813	12.6022	822.076	23.272	14.7157	8.55634	822.076	16.6186	10.2427	6.37584	822.076	15.0948	10.2604	4.83436	822.076	12.0627	9.85577	2.2069	822.076	7.21878	5.99237	1.22642	822.076	9.46279	8.41216	1.05063	822.076	7.39143	6.42	0.971429
822.118	32.3993	21.2655	11.1339	822.118	34.1511	21.3832	12.768	822.118	23.9956	15.2843	8.71127	822.118	16.7261	10.3301	6.39597	822.118	15.6962	10.6042	5.09202	822.118	12.1093	10.0289	2.08046	822.118	7.23486	6.19084	1.04402	822.118	9.1885	8.37838	0.810127	822.118	7.39714	6.58	0.817143
822.16	33.6287	22.2743	11.3543	822.16	35.0965	22.0467	13.0497	822.16	24.7796	16.1177	8.66197	822.16	17.323	11.068	6.25503	822.16	16.4829	11.4583	5.02454	822.16	12.8329	10.8846	1.94828	822.16	7.73014	6.71756	1.01258	822.16	9.39506	8.64189	0.753165	822.16	7.68571	7.04	0.645714
822.202	34.5374	22.9469	11.5906	822.202	35.515	22.2056	13.3094	822.202	25.8349	16.8137	9.02113	822.202	17.6059	11.2233	6.38255	822.202	16.7634	11.8125	4.95092	822.202	13.0749	11.0577	2.01724	822.202	7.96903	6.9313	1.03774	822.202	9.27891	8.50676	0.772152	822.202	7.83619	7.05333	0.782857
822.245	35.6193	23.8319	11.7874	822.245	36.7629	23.028	13.7348	822.245	27.2575	18.0392	9.21831	822.245	18.5004	11.9903	6.51007	822.245	17.387	12.1354	5.25153	822.245	13.6089	11.4135	2.1954	822.245	8.58515	7.46565	1.1195	822.245	9.91558	8.96622	0.949367	822.245	8.6019	7.69333	0.908571
822.287	36.1565	23.9912	12.1654	822.287	38.1975	24.1589	14.0387	822.287	27.9188	18.4118	9.50704	822.287	18.9757	12.2039	6.77181	822.287	17.4171	12.1042	5.31288	822.287	13.6394	11.375	2.26437	822.287	8.95929	7.62595	1.33333	822.287	10.0991	8.96622	1.13291	822.287	8.85048	7.75333	1.09714
822.329	36.0642	23.7257	12.3386	822.329	38.8905	24.6916	14.1989	822.329	27.3569	18.3922	8.96479	822.329	18.5072	12.0777	6.42953	822.329	16.7744	11.8542	4.92025	822.329	13.2808	11.2981	1.98276	822.329	8.5838	7.45801	1.12579	822.329	9.64027	8.71622	0.924051	822.329	8.4181	7.56667	0.851429
822.371	36.8907	24.0797	12.811	822.371	40.4825	25.7477	14.7348	822.371	27.8685	18.8333	9.03521	822.371	19.1179	12.534	6.58389	822.371	17.4608	12.4792	4.9816	822.371	14.0978	12.0289	2.06896	822.371	9.1918	8.05344	1.13837	822.371	10.0245	9.08784	0.936709	822.371	8.90286	8.04	0.862857
822.413	37.3874	24.3717	13.0158	822.413	41.2493	26.2991	14.9503	822.413	28.3814	19.3039	9.07747	822.413	19.5501	12.8252	6.72483	822.413	17.7045	12.8333	4.87117	822.413	14.4866	12.5096	1.97701	822.413	9.07542	8.10687	0.968553	822.413	10.0445	9.2027	0.841772	822.413	8.97905	8.13333	0.845714
822.456	38.4142	25.1858	13.2284	822.456	42.3114	27.3832	14.9282	822.456	29.153	19.8431	9.30986	822.456	20.4683	13.4952	6.97316	822.456	18.3038	13.3958	4.90798	822.456	15.2248	13.1731	2.05172	822.456	9.42796	8.35878	1.06918	822.456	10.5073	9.61486	0.892405	822.456	9.27524	8.36667	0.908571
822.498	39.1577	25.7876	13.3701	822.498	42.2854	27.4953	14.7901	822.498	29.5221	20.0784	9.44366	822.498	20.8545	13.9418	6.91275	822.498	18.2595	13.5417	4.71779	822.498	15.4945	13.5577	1.93678	822.498	9.45398	8.43511	1.01887	822.498	10.5027	9.64189	0.86076	822.498	9.02095	8.10667	0.914286
822.54	40.4411	26.8584	13.5827	822.54	42.3325	27.5701	14.7624	822.54	30.3935	20.6471	9.74648	822.54	21.3949	14.301	7.09396	822.54	19.203	14.0312	5.17178	822.54	15.8076	13.7789	2.02874	822.54	9.79797	8.70992	1.08805	822.54	10.7116	9.74324	0.968354	822.54	9.30762	8.39333	0.914286
822.582	41.2986	27.5664	13.7323	822.582	42.8015	28.1495	14.6519	822.582	30.7722	20.9412	9.83099	822.582	21.2838	14.3107	6.97316	822.582	19.5663	14.4375	5.12883	822.582	15.7272	13.8077	1.91954	822.582	9.68385	8.74046	0.943396	822.582	10.6412	9.83108	0.810127	822.582	9.40476	8.63333	0.771429
822.625	42.4278	28.3097	14.1181	822.625	43.3177	28.5607	14.7569	822.625	31.6516	21.5882	10.0634	822.625	21.6035	14.6505	6.95302	822.625	20.1233	15.0312	5.09202	822.625	16.1929	14.3365	1.85632	822.625	9.87964	8.92366	0.955975	822.625	10.9541	10.0743	0.879747	822.625	9.78476	9.01333	0.771429
822.667	43.1733	28.9292	14.2441	822.667	43.9621	29.1776	14.7845	822.667	32.3884	22.3039	10.0845	822.667	22.016	15.2039	6.81208	822.667	20.6481	15.7708	4.8773	822.667	16.3742	14.6731	1.70115	822.667	10.1391	9.29008	0.849057	822.667	11.2895	10.5743	0.71519	822.667	10.18	9.54	0.64
822.709	43.8659	29.2124	14.6535	822.709	45.0459	29.9906	15.0552	822.709	33.26	23.098	10.162	822.709	22.3403	15.6893	6.65101	822.709	20.6744	15.8646	4.80982	822.709	16.4127	14.7115	1.70115	822.709	10.3004	9.41985	0.880503	822.709	11.5006	10.7095	0.791139	822.709	10.5095	9.76667	0.742857
822.751	44.2164	29.177	15.0394	822.751	45.653	30.4486	15.2044	822.751	34.115	23.8333	10.2817	822.751	22.5242	15.9806	6.54362	822.751	20.6479	15.9792	4.66871	822.751	16.7203	14.9904	1.72988	822.751	10.6255	9.69466	0.930818	822.751	11.7413	10.9122	0.829114	822.751	10.6048	9.79333	0.811428
822.793	44.7938	29.4867	15.3071	822.793	45.8081	30.4766	15.3315	822.793	34.7048	24.402	10.3028	822.793	22.7961	16.2524	6.54362	822.793	21.1159	16.5208	4.59509	822.793	17.128	15.4039	1.72414	822.793	10.9478	10.1679	0.779874	822.793	11.9374	11.3108	0.626582	822.793	11.0981	10.4067	0.691429
822.835	45.2837	29.7168	15.5669	822.835	45.8394	30.8505	14.989	822.835	35.144	24.6863	10.4578	822.835	22.8353	16.5534	6.28188	822.835	20.9753	16.6562	4.31902	822.835	17.0862	15.5	1.58621	822.835	10.9384	10.2214	0.716981	822.835	12.0902	11.4257	0.664557	822.835	10.719	10.1533	0.565714
822.878	46.2732	30.4071	15.8661	822.878	46.1406	31.1682	14.9724	822.878	35.4261	24.8627	10.5634	822.878	23.2863	16.9709	6.31544	822.878	21.1051	16.8229	4.28221	822.878	17.6687	16.0192	1.64942	822.878	11.3093	10.4351	0.874214	822.878	12.7742	11.9324	0.841772	822.878	11.1743	10.38	0.794286
822.92	47.2783	31.2389	16.0394	822.92	46.9168	31.8505	15.0663	822.92	36.2049	25.6274	10.5775	822.92	24.7451	18.0874	6.65772	822.92	21.8312	17.6042	4.22699	822.92	19.1316	17.3558	1.77586	822.92	11.8077	11.0153	0.792453	822.92	13.3148	12.5743	0.740506	822.92	11.6848	10.9533	0.731429
822.962	47.1438	30.8761	16.2677	822.962	46.9482	31.9813	14.9669	822.962	36.3768	25.8627	10.5141	822.962	25.3001	18.6893	6.61074	822.962	21.8023	17.5938	4.20859	822.962	19.7897	18.1058	1.68391	822.962	12.0323	11.0763	0.955975	822.962	13.5947	12.6959	0.898734	822.962	11.6724	10.8667	0.805714
823.004	46.4239	30.3451	16.0787	823.004	46.5441	31.8037	14.7403	823.004	36.5892	26.1667	10.4225	823.004	25.2888	18.6311	6.65772	823.004	21.5669	17.4688	4.09816	823.004	19.8513	18.2019	1.64942	823.004	11.8293	11.0305	0.798742	823.004	13.4398	12.6486	0.791139	823.004	11.3543	10.6	0.754286
823.046	45.9625	30.0885	15.874	823.046	47.0475	32.2243	14.8232	823.046	37.8887	27.2549	10.6338	823.046	26.1496	19.3107	6.83893	823.046	22.6044	18.3958	4.20859	823.046	20.9275	19.0769	1.85058	823.046	12.343	11.4122	0.930818	823.046	14.2479	13.3176	0.93038	823.046	12.0248	11.1333	0.891429
823.089	44.7218	29.6195	15.1024	823.089	46.8032	32.1402	14.663	823.089	38.4852	27.8726	10.6127	823.089	26.6887	19.7961	6.89262	823.089	23.3508	19.0625	4.28834	823.089	21.1588	19.4519	1.7069	823.089	12.3421	11.5496	0.792453	823.089	14.4326	13.6351	0.797468	823.089	12.3133	11.5533	0.76
823.131	43.3966	29.0266	14.3701	823.131	45.3359	31.5514	13.7845	823.131	38.3788	28.0196	10.3591	823.131	26.4323	19.8349	6.59732	823.131	23.402	19.3958	4.00613	823.131	21.2326	19.7212	1.51149	823.131	12.2603	11.6565	0.603774	823.131	14.4501	13.8108	0.63924	823.131	12.0057	11.44	0.565714
823.173	43.2854	29.0177	14.2677	823.173	45.2959	31.8318	13.4641	823.173	38.888	28.6274	10.2606	823.173	26.9213	20.2233	6.69799	823.173	24.3181	20.2812	4.03681	823.173	21.7324	20.1635	1.56897	823.173	12.7053	11.9695	0.735849	823.173	14.9353	14.277	0.658228	823.173	12.0905	11.4333	0.657143
823.215	42.7904	28.9557	13.8346	823.215	44.6542	31.6542	13	823.215	39.8322	29.5294	10.3028	823.215	27.7587	21.1748	6.58389	823.215	25.146	21.0417	4.10429	823.215	22.6558	21.1731	1.48276	823.215	13.1215	12.5114	0.610063	823.215	15.3437	14.7297	0.613924	823.215	12.1448	11.6533	0.491429
823.257	41.9022	28.3982	13.5039	823.257	43.9454	31.4206	12.5249	823.257	40.0278	29.8235	10.2042	823.257	28.3727	21.9029	6.4698	823.257	25.7323	21.6771	4.05521	823.257	23.6236	22.25	1.37356	823.257	13.1974	12.6565	0.54088	823.257	15.3915	14.8851	0.506329	823.257	12.1333	11.6133	0.52
823.3	41.4134	27.9646	13.4488	823.3	43.1423	31.1589	11.9834	823.3	40.8934	30.4216	10.4718	823.3	29.0822	22.5922	6.48993	823.3	26.7815	22.5729	4.20859	823.3	24.3595	22.8365	1.52299	823.3	13.982	13.1832	0.798742	823.3	16.2502	15.4527	0.797468	823.3	12.5752	11.8267	0.748571
823.342	40.2849	27.5133	12.7716	823.342	42.077	30.729	11.3481	823.342	41.2789	30.9902	10.2887	823.342	29.3417	23.1068	6.2349	823.342	26.9854	22.875	4.11043	823.342	24.6079	23.1538	1.45402	823.342	14.3344	13.6489	0.685535	823.342	16.7343	16.1014	0.632911	823.342	12.3343	11.78	0.554286
823.384	39.799	27.2478	12.5512	823.384	41.768	31	10.768	823.384	41.757	31.6373	10.1197	823.384	30.5584	24.4175	6.14094	823.384	27.538	23.5625	3.97546	823.384	25.6157	24.2019	1.41379	823.384	14.941	14.2366	0.704403	823.384	17.1197	16.3919	0.727848	823.384	13.061	12.4667	0.594286
823.426	39.7852	27.2655	12.5197	823.426	41.6039	30.9906	10.6133	823.426	43.0793	32.9314	10.1479	823.426	31.962	25.4854	6.47651	823.426	28.5689	24.3542	4.21472	823.426	26.6162	24.8173	1.79885	823.426	15.6757	14.8015	0.874214	823.426	17.6191	16.6824	0.936709	823.426	13.7771	12.92	0.857143
823.468	38.7335	26.7257	12.0079	823.468	40.4125	30.3738	10.0387	823.468	43.3967	33.3333	10.0634	823.468	32.2264	25.7767	6.44967	823.468	28.5074	24.4583	4.04908	823.468	25.9744	24.3077	1.66667	823.468	15.5186	14.6947	0.823899	823.468	17.4397	16.5473	0.892405	823.468	13.7333	12.8933	0.84
823.511	37.674	26.1858	11.4882	823.511	39.8554	30.3084	9.54696	823.511	44.0656	34.1078	9.95775	823.511	32.508	26.1456	6.36242	823.511	29.2972	25.2604	4.03681	823.511	26.2304	24.6442	1.58621	823.511	15.5037	14.7176	0.786164	823.511	17.8182	17.027	0.791139	823.511	14.0314	13.3	0.731429
823.553	36.9098	25.6814	11.2284	823.553	39.2193	29.8879	9.33149	823.553	44.7106	34.8725	9.83803	823.553	33.0002	26.6311	6.36913	823.553	30.4493	26.3021	4.14724	823.553	26.576	24.8462	1.72988	823.553	16.0871	15.1374	0.949685	823.553	18.7813	17.8446	0.936709	823.553	14.8324	13.9467	0.885714
823.595	36.1805	25.5664	10.6142	823.595	38.802	29.9346	8.8674	823.595	44.7758	35.3039	9.47183	823.595	33.5501	27.3689	6.18121	823.595	31.2905	27.2292	4.06135	823.595	26.7437	25.1058	1.63793	823.595	16.4359	15.6183	0.81761	823.595	19.5246	18.6892	0.835443	823.595	15.5714	14.8	0.771429
823.637	34.4423	24.6549	9.7874	823.637	37.8472	29.6262	8.221	823.637	44.6007	35.3824	9.21831	823.637	34.0507	27.9903	6.0604	823.637	31.8485	27.9896	3.8589	823.637	27.4327	25.9327	1.5	823.637	16.9846	16.1985	0.786164	823.637	20.1484	19.3446	0.803798	823.637	16.3467	15.6267	0.72
823.679	32.8903	23.5044	9.38583	823.679	36.2913	28.5234	7.76796	823.679	44.4169	35.2549	9.16197	823.679	34.6629	28.4951	6.16779	823.679	32.4294	28.5521	3.8773	823.679	28.18	26.4904	1.68965	823.679	17.489	16.5267	0.962264	823.679	20.7648	19.7838	0.981013	823.679	16.8048	15.8733	0.931429
823.722	31.6084	22.8761	8.73228	823.722	35.3166	28.1121	7.20442	823.722	44.6199	35.7255	8.89437	823.722	35.762	29.4466	6.31544	823.722	33.5097	29.5833	3.92638	823.722	29.3396	27.6442	1.6954	823.722	18.1113	17.1679	0.943396	823.722	21.256	20.3446	0.911392	823.722	17.76	16.88	0.88
823.764	29.6911	21.8407	7.85039	823.764	33.3901	26.9813	6.40884	823.764	44.3658	35.8235	8.54225	823.764	36.1187	30.0583	6.0604	823.764	33.7625	30.0938	3.66871	823.764	29.6054	28.0192	1.58621	823.764	18.0205	17.2595	0.761006	823.764	21.205	20.4392	0.765823	823.764	17.8362	17.0533	0.782857
823.806	28.198	20.8673	7.33071	823.806	31.6796	25.8785	5.8011	823.806	44.6345	36.1275	8.50704	823.806	36.6546	30.9029	5.75168	823.806	33.9063	30.3542	3.55215	823.806	30.4459	28.8654	1.58046	823.806	18.4732	17.5801	0.893082	823.806	21.3481	20.5	0.848101	823.806	18.1067	17.2667	0.84
823.848	26.6312	19.6549	6.97638	823.848	29.8625	24.4206	5.44199	823.848	44.5902	36.2451	8.34507	823.848	37.2064	31.4078	5.79866	823.848	34.1816	30.5312	3.65031	823.848	31.2665	29.5481	1.71839	823.848	18.7984	17.855	0.943396	823.848	21.6255	20.6824	0.943038	823.848	18.3638	17.3867	0.977143
823.89	24.2292	18.1504	6.07874	823.89	27.748	23.0187	4.72928	823.89	43.7829	36.0294	7.75352	823.89	37.6797	32.2233	5.45638	823.89	34.3154	30.9167	3.39877	823.89	31.8039	30.3269	1.47701	823.89	18.8612	18.0687	0.792453	823.89	21.5509	20.8041	0.746835	823.89	18.2495	17.5467	0.702857
823.933	23.0094	17.4425	5.56693	823.933	25.8149	21.4393	4.37569	823.933	43.004	35.5392	7.46479	823.933	38.157	32.7476	5.4094	823.933	34.6451	31.2708	3.37423	823.933	32.834	31.1731	1.66092	823.933	19.175	18.3511	0.823899	823.933	21.9182	21.1081	0.810127	823.933	18.9162	18.0933	0.822857
823.975	21.469	16.469	5	823.975	23.7897	19.8505	3.93923	823.975	42.5315	35.4118	7.11972	823.975	38.5984	33.2427	5.35571	823.975	35.8938	32.5625	3.33129	823.975	33.204	31.75	1.45402	823.975	19.8993	19.1069	0.792453	823.975	22.5749	21.7838	0.791139	823.975	19.5143	18.84	0.674286
824.017	20.049	15.2301	4.8189	824.017	22.1282	18.3271	3.80111	824.017	41.825	34.8039	7.02113	824.017	38.8293	33.534	5.2953	824.017	36.4489	33.1667	3.28221	824.017	33.2593	31.6731	1.58621	824.017	20.5873	19.6565	0.930818	824.017	22.9591	22.0541	0.905063	824.017	19.8771	19.02	0.857143
824.059	18.6296	14.354	4.27559	824.059	21.3336	18.0187	3.31492	824.059	40.9666	34.4314	6.53521	824.059	39.2509	34.2039	5.04698	824.059	36.8824	33.8333	3.04908	824.059	34.0251	32.5481	1.47701	824.059	21.0174	20.2061	0.811321	824.059	23.2615	22.4324	0.829114	824.059	20.2895	19.4667	0.822857
824.101	17.8438	13.7257	4.11811	824.101	20.3382	17.2056	3.1326	824.101	40.0197	33.7451	6.27465	824.101	39.0157	34.0291	4.98658	824.101	37.1393	34.0104	3.12883	824.101	34.5286	32.9712	1.55747	824.101	21.4692	20.5572	0.91195	824.101	23.5727	22.6486	0.924051	824.101	20.3419	19.4333	0.908571
824.144	16.7301	13.1947	3.53543	824.144	19.5844	16.7944	2.79006	824.144	38.7967	33.0784	5.71831	824.144	39.0794	34.2136	4.86577	824.144	38.2096	35.1667	3.04295	824.144	35.1274	33.7596	1.36782	824.144	21.7511	21.0153	0.735849	824.144	23.8837	23.1622	0.721519	824.144	20.8162	20.0333	0.782857
824.186	16.261	12.7965	3.46457	824.186	19.0539	16.2804	2.77348	824.186	38.0312	32.4608	5.57042	824.186	39.2847	34.3786	4.90604	824.186	39.1743	35.9167	3.25767	824.186	36.109	34.4423	1.66667	824.186	22.6717	21.6717	1	824.186	24.3732	23.2973	1.07595	824.186	21.419	20.3733	1.04571
824.228	15.1543	12.1858	2.9685	824.228	17.9671	15.514	2.45304	824.228	36.5267	31.5196	5.00704	824.228	39.1671	34.5631	4.60403	824.228	39.3095	36.2604	3.04908	824.228	36.5309	35.0769	1.45402	824.228	22.9689	22.2519	0.716981	824.228	24.1028	23.3243	0.778481	824.228	21.4971	20.68	0.817143
824.27	14.4324	11.6372	2.79528	824.27	16.9781	14.6355	2.34254	824.27	34.9757	30.3137	4.66197	824.27	38.9	34.4369	4.46309	824.27	40.1447	37.0833	3.06135	824.27	37.0715	35.6635	1.40805	824.27	23.5167	22.7557	0.761006	824.27	24.6603	23.9324	0.727848	824.27	21.5438	20.8067	0.737143
824.312	13.8915	11.2301	2.66142	824.312	16.2189	13.9813	2.23757	824.312	34.1697	29.6274	4.54225	824.312	38.4468	34.0777	4.36913	824.312	40.4823	37.4271	3.05522	824.312	37.8481	36.3654	1.48276	824.312	24.2123	23.4199	0.792453	824.312	25.5618	24.6757	0.886076	824.312	21.6895	20.9067	0.782857
824.354	12.7379	10.3363	2.40157	824.354	15.3891	13.4112	1.9779	824.354	32.8581	28.6961	4.16197	824.354	37.9588	33.8447	4.11409	824.354	40.7161	37.9062	2.80982	824.354	38.3197	36.9519	1.36782	824.354	24.5517	23.8473	0.704403	824.354	25.7012	24.9797	0.721519	824.354	21.9038	21.1667	0.737143
824.397	11.962	9.65487	2.30709	824.397	14.3232	12.5608	1.76243	824.397	31.9344	27.8922	4.04225	824.397	37.3735	33.4272	3.94631	824.397	40.5396	37.7604	2.77914	824.397	38.6926	37.2788	1.41379	824.397	24.9465	24.1603	0.786164	824.397	26.1158	25.2297	0.886076	824.397	22.2114	21.44	0.771429
824.439	11.7239	9.49558	2.22835	824.439	13.723	11.8224	1.90055	824.439	31.1867	27.3627	3.82394	824.439	37.3496	33.4369	3.91275	824.439	40.9006	38.0417	2.8589	824.439	38.998	37.4808	1.51724	824.439	25.6928	24.8626	0.830189	824.439	27.1357	26.3446	0.791139	824.439	22.8486	22.02	0.828571
824.481	10.5793	8.46903	2.11024	824.481	12.8499	11.0654	1.78453	824.481	29.9935	26.402	3.59155	824.481	37.37	33.6116	3.75839	824.481	40.1038	37.4167	2.68712	824.481	39.083	37.6635	1.41954	824.481	25.8558	25.0382	0.81761	824.481	28.0355	27.0608	0.974684	824.481	23.2057	22.32	0.885714
824.523	9.41474	7.61947	1.79528	824.523	11.3409	9.88785	1.45304	824.523	28.6472	25.3726	3.27465	824.523	37.0687	33.5922	3.47651	824.523	39.1188	36.6771	2.44172	824.523	38.9794	37.6346	1.34483	824.523	26.048	25.2366	0.811321	824.523	28.2024	27.3986	0.803798	824.523	23.7629	22.98	0.782857
824.565	8.61731	6.81416	1.80315	824.565	10.4157	8.96262	1.45304	824.565	27.848	24.7353	3.11268	824.565	36.9242	33.6893	3.2349	824.565	37.9293	35.6042	2.32515	824.565	38.6369	37.2404	1.39655	824.565	26.2258	25.3893	0.836478	824.565	28.6736	27.7432	0.93038	824.565	24.0295	23.1667	0.862857
824.608	8.20312	6.62832	1.5748	824.608	9.58218	8.14019	1.44199	824.608	27.2142	24.2353	2.97887	824.608	37.6448	34.3495	3.2953	824.608	37.6291	35.2917	2.33742	824.608	38.8679	37.5288	1.33908	824.608	26.8684	26.0382	0.830189	824.608	29.4009	28.5338	0.867089	824.608	24.4314	23.62	0.811428
824.65	7.64358	6.12389	1.51968	824.65	8.82424	7.57009	1.25414	824.65	26.0551	23.4706	2.58451	824.65	37.7413	34.5534	3.18792	824.65	36.5632	34.4896	2.07362	824.65	38.7066	37.4135	1.2931	824.65	27.0124	26.3206	0.691824	824.65	29.5234	28.7703	0.753165	824.65	24.6181	23.9267	0.691429
824.692	7.08202	5.67257	1.40945	824.692	8.62457	7.39252	1.23204	824.692	25.1664	22.7157	2.4507	824.692	37.5885	34.6019	2.98658	824.692	35.3015	33.2708	2.03068	824.692	38.5491	37.3077	1.24138	824.692	27.3623	26.5572	0.805031	824.692	29.7751	28.9459	0.829114	824.692	24.759	24.0333	0.725714
824.734	7.06529	5.66372	1.40158	824.734	8.34848	7.02804	1.32044	824.734	24.64	22.1471	2.49296	824.734	37.256	34.1553	3.10067	824.734	34.6093	32.4375	2.17178	824.734	38.4541	37.0288	1.42529	824.734	27.299	26.5191	0.779874	824.734	30.2751	29.4459	0.829114	824.734	25.161	24.3667	0.794286
824.776	6.10647	4.82301	1.28347	824.776	7.46476	6.42056	1.0442	824.776	22.8651	20.6961	2.16901	824.776	36.0027	33.2913	2.71141	824.776	33.0384	31.1979	1.84049	824.776	37.5511	36.3269	1.22414	824.776	26.9231	26.0992	0.823899	824.776	30.0407	29.2432	0.797468	824.776	25.2533	24.4933	0.76
824.819	6.01603	4.71681	1.29921	824.819	7.30129	6.07477	1.22652	824.819	21.9772	19.7941	2.1831	824.819	35.3095	32.5243	2.78524	824.819	32.5294	30.5417	1.98773	824.819	36.8237	35.4904	1.33333	824.819	27.2649	26.397	0.867924	824.819	30.3342	29.4797	0.85443	824.819	25.82	25.06	0.76
824.861	5.45432	4.40708	1.04724	824.861	6.83859	5.79439	1.0442	824.861	20.6505	18.7843	1.8662	824.861	34.0813	31.5243	2.55705	824.861	32.007	30.2708	1.7362	824.861	35.9822	34.8558	1.12644	824.861	26.7663	26.1374	0.628931	824.861	29.6493	28.9595	0.689873	824.861	26.199	25.5133	0.685714
824.903	5.21253	4.0708	1.14173	824.903	6.49063	5.5514	0.939226	824.903	19.6454	17.9412	1.70423	824.903	32.9702	30.534	2.43624	824.903	32.3949	30.6771	1.71779	824.903	35.6267	34.5577	1.06897	824.903	26.7067	25.9771	0.72956	824.903	29.3562	28.6284	0.727848	824.903	26.4724	25.7467	0.725714
824.945	5.06898	3.91151	1.15748	824.945	6.56333	5.48598	1.07735	824.945	19.1208	17.3039	1.8169	824.945	31.8798	29.4369	2.44295	824.945	32.5654	30.7188	1.84663	824.945	35.4973	34.3077	1.18965	824.945	27.066	26.1603	0.90566	824.945	29.1002	28.1824	0.917721	824.945	26.7962	25.8933	0.902857
824.987	5.02585	3.73451	1.29134	824.987	6.18702	4.94393	1.24309	824.987	18.2988	16.4608	1.83803	824.987	30.5212	27.9709	2.55034	824.987	32.093	30.1667	1.92638	824.987	35.5138	34.1058	1.40805	824.987	26.8159	25.8473	0.968553	824.987	28.5291	27.4595	1.06962	824.987	26.7124	25.7067	1.00571
825.029	4.15804	3.43363	0.72441	825.029	5.52156	4.7757	0.745856	825.029	17.0384	15.6863	1.35211	825.029	29.4892	27.4757	2.01342	825.029	31.3259	29.9271	1.39877	825.029	34.8122	33.9904	0.821839	825.029	25.8274	25.3053	0.522013	825.029	27.0806	26.5743	0.506329	825.029	26.46	25.86	0.6
825.072	4.77409	3.52212	1.25197	825.072	5.45041	4.19626	1.25414	825.072	16.6203	14.902	1.71831	825.072	28.903	26.4466	2.45638	825.072	30.5851	28.6771	1.90797	825.072	34.6582	33.2788	1.37931	825.072	25.4562	24.4122	1.04402	825.072	26.7917	25.7095	1.08228	825.072	26.8286	25.76	1.06857
825.114	4.13281	3.06195	1.07087	825.114	4.91289	3.96262	0.950276	825.114	15.4292	13.8235	1.60563	825.114	27.7549	25.6408	2.11409	825.114	29.4327	27.8438	1.58896	825.114	33.9263	32.7596	1.16667	825.114	24.7085	23.8092	0.899371	825.114	25.8391	24.8581	0.981013	825.114	26.3114	25.42	0.891429
825.156	3.86997	3.1062	0.763779	825.156	4.72975	3.90654	0.823204	825.156	14.2949	13.1471	1.14789	825.156	27.1467	25.3883	1.75839	825.156	28.6568	27.2396	1.41718	825.156	32.7367	31.7885	0.948276	825.156	23.9041	23.4199	0.484277	825.156	24.7969	24.2905	0.506329	825.156	25.8105	25.3133	0.497143
825.198	3.66852	2.77876	0.889764	825.198	4.08277	3.24299	0.839779	825.198	13.2238	12.0196	1.20423	825.198	26.3282	24.5631	1.7651	825.198	27.5684	26.2188	1.34969	825.198	31.0099	30.0962	0.913793	825.198	23.5881	22.8397	0.748428	825.198	24.0884	23.2973	0.791139	825.198	25.8952	25.1467	0.748571
825.24	3.74531	2.76106	0.984252	825.24	4.01869	3.01869	1	825.24	12.4971	11.2647	1.23239	825.24	25.5565	23.6505	1.90604	825.24	27.0582	25.6042	1.45399	825.24	29.8651	28.7788	1.08621	825.24	23.29	22.5038	0.786164	825.24	23.7798	23.0203	0.759494	825.24	25.6714	24.86	0.811428
825.283	3.40018	2.41593	0.984252	825.283	3.69453	2.76635	0.928177	825.283	11.9315	10.6569	1.27465	825.283	24.4977	22.699	1.79866	825.283	26.041	24.5625	1.47853	825.283	28.8015	27.6923	1.10919	825.283	22.6295	21.8244	0.805031	825.283	23.3536	22.4865	0.867089	825.283	25.019	24.1733	0.845714
825.325	3.15435	2.18584	0.968504	825.325	3.4944	2.68224	0.812155	825.325	11.12	9.95098	1.16901	825.325	23.3029	21.6117	1.69128	825.325	24.697	23.4271	1.26994	825.325	27.2921	26.2404	1.05172	825.325	22.3129	21.5267	0.786164	825.325	22.8245	22.027	0.797468	825.325	24.4905	23.6733	0.817143
825.367	3.01658	2.15044	0.866142	825.367	3.45195	2.5514	0.900552	825.367	10.628	9.52941	1.09859	825.367	22.6099	20.932	1.67785	825.367	23.8349	22.5833	1.25153	825.367	26.1347	25.1635	0.971264	825.367	22.3187	21.5954	0.72327	825.367	22.3393	21.5608	0.778481	825.367	23.9267	23.1667	0.76
825.409	2.99979	2.21239	0.787402	825.409	3.67197	2.85981	0.812155	825.409	10.1078	9.10784	1	825.409	21.9911	20.5146	1.47651	825.409	23.5394	22.4167	1.1227	825.409	25.4009	24.625	0.775862	825.409	22.2446	21.603	0.641509	825.409	21.9728	21.2703	0.702532	825.409	23.301	22.6667	0.634286
825.452	2.58581	1.81416	0.771653	825.452	3.10823	2.34579	0.762431	825.452	9.28556	8.31372	0.971831	825.452	20.7485	19.3592	1.38926	825.452	22.5712	21.4792	1.09203	825.452	24.3987	23.5481	0.850575	825.452	21.668	21.0076	0.660377	825.452	21.3791	20.6892	0.689873	825.452	22.06	21.42	0.64
825.494	2.52679	1.77876	0.748031	825.494	3.10905	2.40187	0.707182	825.494	8.63394	7.72549	0.908451	825.494	19.7435	18.4951	1.24832	825.494	22.1183	21.0938	1.02454	825.494	23.9047	23.1346	0.770115	825.494	21.3124	20.7023	0.610063	825.494	20.9357	20.2838	0.651899	825.494	21.4486	20.82	0.628571
825.536	2.64386	1.84071	0.80315	825.536	2.95275	2.16822	0.78453	825.536	8.49724	7.4902	1.00704	825.536	18.8308	17.5825	1.24832	825.536	21.6197	20.4479	1.17178	825.536	23.7234	22.7981	0.925287	825.536	21.0035	20.1985	0.805031	825.536	20.9874	20.1014	0.886076	825.536	21.1514	20.34	0.811428
825.578	2.45405	1.69027	0.763779	825.578	2.77095	1.95327	0.81768	825.578	8.17371	7.16667	1.00704	825.578	18.0235	16.7282	1.2953	825.578	20.3085	19.0938	1.21472	825.578	23.2636	22.2981	0.965517	825.578	20.1849	19.4428	0.742138	825.578	20.4778	19.75	0.727848	825.578	20.4819	19.7733	0.708571
825.62	2.45983	1.81416	0.645669	825.62	3.11927	2.34579	0.773481	825.62	7.69497	6.89216	0.802817	825.62	17.5636	16.3689	1.19463	825.62	19.1269	18.1146	1.01227	825.62	22.822	22.0288	0.793103	825.62	19.5265	18.9542	0.572327	825.62	20.0873	19.4797	0.607595	825.62	20.0695	19.4467	0.622857
825.663	2.53961	1.75221	0.787402	825.663	2.91919	2.14019	0.779006	825.663	7.33306	6.38235	0.950704	825.663	16.91	15.6214	1.28859	825.663	18.0081	16.8854	1.1227	825.663	21.7929	20.9423	0.850575	825.663	19.3923	18.6565	0.735849	825.663	19.588	18.7905	0.797468	825.663	19.6781	18.9867	0.691429
825.705	2.14138	1.35398	0.787402	825.705	2.28879	1.47663	0.812155	825.705	6.64554	5.66667	0.978873	825.705	15.3119	14.0971	1.21477	825.705	16.2115	15.1562	1.05522	825.705	20.3658	19.4808	0.885057	825.705	18.2707	17.4657	0.805031	825.705	18.1391	17.2973	0.841772	825.705	18.5933	17.7933	0.8
825.747	2.33893	1.64602	0.692913	825.747	2.63541	1.87851	0.756906	825.747	6.54363	5.7549	0.788732	825.747	14.8735	13.699	1.1745	825.747	15.731	14.7188	1.01227	825.747	20.1219	19.3173	0.804598	825.747	17.998	17.3817	0.616352	825.747	17.1447	16.4865	0.658228	825.747	18.0733	17.5133	0.56
825.789	2.0439	1.39823	0.645669	825.789	2.34352	1.69159	0.651934	825.789	5.96161	5.31372	0.647887	825.789	13.7453	12.7185	1.02685	825.789	14.4551	13.6146	0.840491	825.789	18.9567	18.1923	0.764368	825.789	16.9684	16.4275	0.54088	825.789	15.9036	15.277	0.626582	825.789	17.5305	16.8733	0.657143
825.831	1.63473	1.11504	0.519685	825.831	1.97387	1.47663	0.497238	825.831	5.40583	4.71569	0.690141	825.831	12.57	11.6505	0.919463	825.831	13.3023	12.6458	0.656442	825.831	18.0784	17.4519	0.626437	825.831	15.8103	15.2443	0.566038	825.831	14.6405	14.0203	0.620253	825.831	16.5	15.98	0.52
825.873	1.89945	1.15929	0.740158	825.873	2.02071	1.28037	0.740332	825.873	5.285	4.41176	0.873239	825.873	11.8594	10.7185	1.14094	825.873	12.4435	11.5417	0.901841	825.873	17.5679	16.7115	0.856322	825.873	15.1548	14.4504	0.704403	825.873	14.0301	13.1757	0.85443	825.873	16.1714	15.44	0.731429
825.916	1.78517	1.26549	0.519685	825.916	2.32736	1.71963	0.607735	825.916	5.02168	4.40196	0.619718	825.916	11.0017	10.1359	0.865772	825.916	11.9778	11.125	0.852761	825.916	16.7341	16.0962	0.637931	825.916	14.3671	13.8702	0.496855	825.916	13.4362	12.8919	0.544304	825.916	15.8533	15.2933	0.56
825.958	1.64079	0.955752	0.685039	825.958	1.91532	1.25234	0.662983	825.958	4.63491	3.80392	0.830986	825.958	9.81423	8.94175	0.872483	825.958	10.982	10.1354	0.846626	825.958	15.3334	14.5289	0.804598	825.958	13.479	12.7557	0.72327	825.958	12.5323	11.8108	0.721519	825.958	15.0057	14.28	0.725714
826	2.23587	1.35398	0.88189	826	2.15377	1.18692	0.966851	826	4.90748	3.92157	0.985915	826	9.72477	8.45631	1.26846	826	10.9052	9.73958	1.16564	826	15.3209	14.2404	1.08046	826	13.3197	12.458	0.861635	826	12.411	11.4932	0.917721	826	14.9381	14.0467	0.891429
826.042	1.98613	1.0885	0.897638	826.042	2.00924	1.25234	0.756906	826.042	4.43841	3.43137	1.00704	826.042	8.84837	7.83495	1.01342	826.042	10.2634	9.3125	0.95092	826.042	14.4621	13.6058	0.856322	826.042	12.3484	11.4428	0.90566	826.042	11.6935	10.7568	0.936709	826.042	14.2762	13.3733	0.902857
826.084	1.99979	1.21239	0.787402	826.084	2.14349	1.36449	0.779006	826.084	4.35515	3.46078	0.894366	826.084	8.38535	7.37864	1.00671	826.084	9.67338	8.69792	0.97546	826.084	13.9582	13.0961	0.862069	826.084	11.6182	10.8321	0.786164	826.084	11.2813	10.3446	0.936709	826.084	13.6924	12.8067	0.885714
826.127	1.74023	0.929203	0.811024	826.127	1.80317	1.14019	0.662983	826.127	3.89133	3.03922	0.852113	826.127	7.75441	6.83495	0.919463	826.127	8.7045	7.83333	0.871166	826.127	12.9951	12.2308	0.764368	826.127	10.8701	10.084	0.786164	826.127	10.3106	9.50676	0.803798	826.127	12.9457	12.14	0.805714
826.169	1.7727	0.938053	0.834646	826.169	1.66427	0.962617	0.701658	826.169	3.66708	2.84314	0.823944	826.169	7.41233	6.46602	0.946309	826.169	8.07637	7.26042	0.815951	826.169	12.247	11.4711	0.775862	826.169	10.4642	9.67176	0.792453	826.169	9.7092	8.90541	0.803798	826.169	12.141	11.3867	0.754286
826.211	1.59947	0.938053	0.661417	826.211	1.91191	1.27103	0.640884	826.211	3.54212	2.77451	0.767606	826.211	7.32879	6.45631	0.872483	826.211	7.86375	7.04167	0.822086	826.211	11.6089	10.9135	0.695402	826.211	9.91003	9.27481	0.63522	826.211	9.17046	8.49324	0.677215	826.211	11.6676	10.9933	0.674286
826.253	1.7343	0.946903	0.787402	826.253	1.54066	0.82243	0.718232	826.253	3.29301	2.4902	0.802817	826.253	6.72529	5.80582	0.919463	826.253	7.18852	6.35417	0.834356	826.253	10.653	9.92308	0.729885	826.253	9.46013	8.75572	0.704403	826.253	8.6501	7.87162	0.778481	826.253	10.861	10.0667	0.794286
826.295	1.34255	0.964602	0.377953	826.295	1.54691	1.12149	0.425414	826.295	2.8778	2.44118	0.43662	826.295	6.47253	5.83495	0.637584	826.295	6.8996	6.32292	0.576687	826.295	9.81145	9.28846	0.522988	826.295	8.90316	8.55725	0.345912	826.295	7.96502	7.5473	0.417722	826.295	10.121	9.76667	0.354286
826.338	1.70281	0.946903	0.755906	826.338	1.53338	0.953271	0.58011	826.338	3.07581	2.29412	0.78169	826.338	6.30794	5.47573	0.832215	826.338	6.69453	5.95833	0.736196	826.338	9.21629	8.45192	0.764368	826.338	8.87105	8.05344	0.81761	826.338	7.99427	7.20946	0.78481	826.338	9.90381	9.12667	0.777143
826.38	1.90816	1.30973	0.598425	826.38	1.99179	1.31776	0.674033	826.38	3.46092	2.68628	0.774648	826.38	6.67375	5.74757	0.926175	826.38	6.79211	5.92708	0.865031	826.38	9.12036	8.41346	0.706897	826.38	8.6213	7.99237	0.628931	826.38	7.99316	7.39189	0.601266	826.38	9.8	9.16	0.64
826.422	1.64964	0.964602	0.685039	826.422	1.70248	1.05608	0.646409	826.422	2.86385	2.16667	0.697183	826.422	5.88519	5.01942	0.865772	826.422	6.20265	5.34375	0.858896	826.422	8.20325	7.54808	0.655172	826.422	7.95449	7.31298	0.641509	826.422	7.63035	6.95946	0.670886	826.422	9.2	8.48	0.72
826.464	1.40764	0.840708	0.566929	826.464	1.67186	1.1028	0.569061	826.464	2.68034	1.9902	0.690141	826.464	5.50811	4.68932	0.818792	826.464	5.8612	5.125	0.736196	826.464	7.81112	7.20192	0.609195	826.464	7.48303	6.77863	0.704403	826.464	7.37864	6.68243	0.696202	826.464	8.62952	7.96667	0.662857
826.506	1.50317	0.778761	0.72441	826.506	1.53385	0.859813	0.674033	826.506	2.65576	1.85294	0.802817	826.506	5.17345	4.30097	0.872483	826.506	5.31653	4.53125	0.785276	826.506	7.47977	6.72115	0.758621	826.506	6.98781	6.14504	0.842767	826.506	7.0804	6.27027	0.810127	826.506	8.04571	7.28	0.765714
826.548	1.77556	1.0354	0.740158	826.548	1.87505	1.01869	0.856354	826.548	2.81386	2.03922	0.774648	826.548	5.21144	4.27184	0.939597	826.548	5.49687	4.55208	0.944785	826.548	7.57173	6.72115	0.850575	826.548	6.82702	6.05344	0.773585	826.548	7.12008	6.2973	0.822785	826.548	7.84095	7.00667	0.834286
826.591	1.00439	0.539823	0.464567	826.591	1.0805	0.588785	0.491713	826.591	2.1164	1.58824	0.528169	826.591	4.34404	3.67961	0.66443	826.591	4.44868	3.82292	0.625767	826.591	6.31919	5.80769	0.511494	826.591	5.71914	5.19084	0.528302	826.591	6.07176	5.53378	0.537975	826.591	6.67619	6.13333	0.542857
826.633	1.42938	0.752212	0.677165	826.633	1.55207	0.971963	0.58011	826.633	2.52955	1.7549	0.774648	826.633	4.58063	3.81553	0.765101	826.633	4.65657	3.89583	0.760736	826.633	6.47027	5.74038	0.729885	826.633	5.85755	5.08397	0.773585	826.633	6.27087	5.47973	0.791139	826.633	6.72571	5.96	0.765714
826.675	1.37628	0.699115	0.677165	826.675	1.33459	0.71028	0.624309	826.675	2.27437	1.54902	0.725352	826.675	4.30423	3.48544	0.818792	826.675	4.44082	3.72917	0.711657	826.675	5.96076	5.25962	0.701149	826.675	5.32186	4.54199	0.779874	826.675	5.83168	5.04054	0.791139	826.675	6.23143	5.46	0.771429
826.717	1.92628	0.902655	1.02362	826.717	1.8721	0.943925	0.928177	826.717	2.69912	1.65686	1.04225	826.717	4.51	3.45631	1.05369	826.717	4.6882	3.61458	1.07362	826.717	6.13075	5.125	1.00575	826.717	5.41985	4.41985	1	826.717	5.9598	4.86486	1.09494	826.717	6.54476	5.53333	1.01143
826.76	1.34681	0.646018	0.700787	826.76	1.42082	0.813084	0.607735	826.76	2.22162	1.41176	0.809859	826.76	3.79494	3.00971	0.785235	826.76	4.05841	3.39583	0.662577	826.76	5.40694	4.71154	0.695402	826.76	4.97657	4.15267	0.823899	826.76	5.16105	4.34459	0.816456	826.76	5.94952	5.12667	0.822857
826.802	1.37426	0.752212	0.622047	826.802	1.28105	0.700935	0.58011	826.802	2.08934	1.39216	0.697183	826.802	3.58363	2.82524	0.758389	826.802	4.06895	3.30208	0.766871	826.802	5.00508	4.32692	0.678161	826.802	4.73268	4.05344	0.679245	826.802	4.87102	4.16216	0.708861	826.802	5.80286	5.06	0.742857
826.844	1.47474	0.663717	0.811024	826.844	1.41447	0.757009	0.657458	826.844	2.20657	1.33333	0.873239	826.844	3.45514	2.6699	0.785235	826.844	3.98006	3.25	0.730061	826.844	4.67595	3.92308	0.752873	826.844	4.64295	3.79389	0.849057	826.844	4.67277	3.72973	0.943038	826.844	5.76095	4.88667	0.874286
826.886	1.43426	0.79646	0.637795	826.886	1.38555	0.794392	0.59116	826.886	2.08382	1.37255	0.711268	826.886	3.40229	2.73786	0.66443	826.886	3.81026	3.13542	0.674847	826.886	4.59162	3.91346	0.678161	826.886	4.36401	3.70992	0.654088	826.886	4.37778	3.66892	0.708861	826.886	5.58381	4.88667	0.697143
826.928	1.59466	0.823009	0.771653	826.928	1.40812	0.700935	0.707182	826.928	2.1726	1.36275	0.809859	826.928	3.23855	2.4466	0.791946	826.928	3.6149	2.85417	0.760736	826.928	4.54686	3.73077	0.816092	826.928	4.42921	3.58015	0.849057	826.928	4.42875	3.57432	0.85443	826.928	5.55238	4.74667	0.805714
826.971	1.38618	0.646018	0.740158	826.971	1.17442	0.588785	0.585635	826.971	1.77561	1.07843	0.697183	826.971	2.81593	2.07767	0.738255	826.971	3.36733	2.625	0.742331	826.971	4.03183	3.30769	0.724138	826.971	3.92626	3.15267	0.773585	826.971	4.07911	3.25	0.829114	826.971	4.89238	4.12667	0.765714
827.013	0.980698	0.610619	0.370079	827.013	1.08726	0.672897	0.414365	827.013	1.61737	1.16667	0.450704	827.013	2.57959	2.11651	0.463087	827.013	3.13976	2.59375	0.546012	827.013	3.78658	3.29808	0.488506	827.013	3.48471	3.03817	0.446541	827.013	3.66174	3.15541	0.506329	827.013	4.38	3.94	0.44
827.055	1.44812	0.707965	0.740158	827.055	1.41235	0.738318	0.674033	827.055	1.93579	1.14706	0.788732	827.055	2.97928	2.1068	0.872483	827.055	3.45878	2.59375	0.865031	827.055	3.92971	3.15385	0.775862	827.055	3.75697	2.9771	0.779874	827.055	4.00736	3.21622	0.791139	827.055	4.66762	3.87333	0.794286
827.097	1.56303	0.964602	0.598425	827.097	1.5861	0.906542	0.679558	827.097	1.8633	1.26471	0.598592	827.097	2.98241	2.20388	0.778524	827.097	3.39743	2.59375	0.803681	827.097	3.72624	3.04808	0.678161	827.097	3.63119	2.9771	0.654088	827.097	3.95758	3.22973	0.727848	827.097	4.54095	3.82667	0.714286
827.139	1.19908	0.734513	0.464567	827.139	1.24619	0.71028	0.535912	827.139	1.73737	1.11765	0.619718	827.139	2.76523	2.08738	0.677852	827.139	3.08979	2.32292	0.766871	827.139	3.37456	2.75962	0.614943	827.139	3.34918	2.73282	0.616352	827.139	3.67593	2.97973	0.696202	827.139	4.24	3.6	0.64
827.182	1.39217	0.557522	0.834646	827.182	1.08313	0.392523	0.690608	827.182	1.73019	0.892157	0.838028	827.182	2.53196	1.67961	0.852349	827.182	2.69395	1.92708	0.766871	827.182	3.17363	2.31731	0.856322	827.182	3.33674	2.41221	0.924528	827.182	3.44979	2.50676	0.943038	827.182	3.8381	2.90667	0.931429
827.224	1.02014	0.539823	0.480315	827.224	1.15057	0.719626	0.430939	827.224	1.39768	0.911765	0.485916	827.224	2.22923	1.69903	0.530201	827.224	2.60723	2.10417	0.503068	827.224	2.9748	2.42308	0.551724	827.224	3.03438	2.48092	0.553459	827.224	3.06158	2.47297	0.588608	827.224	3.54667	2.94667	0.6
827.266	1.28667	0.743363	0.543307	827.266	1.62044	1.11215	0.508287	827.266	1.68531	1.10784	0.577465	827.266	2.5405	1.90291	0.637584	827.266	2.88005	2.26042	0.619632	827.266	3.21706	2.65385	0.563218	827.266	3.14485	2.57252	0.572327	827.266	3.32629	2.65541	0.670886	827.266	3.71619	3.13333	0.582857
827.308	0.913943	0.433628	0.480315	827.308	0.834461	0.514019	0.320442	827.308	1.23957	0.72549	0.514085	827.308	1.99407	1.52427	0.469799	827.308	2.22054	1.76042	0.460123	827.308	2.42916	2.00962	0.41954	827.308	2.70565	2.22137	0.484277	827.308	2.66635	2.12838	0.537975	827.308	3.17143	2.64	0.531429
827.35	1.57104	0.823009	0.748031	827.35	1.5071	0.794392	0.712707	827.35	1.99213	1.14706	0.84507	827.35	2.70144	1.81553	0.885906	827.35	2.8295	1.95833	0.871166	827.35	3.18546	2.40385	0.781609	827.35	3.30347	2.47328	0.830189	827.35	3.36162	2.51351	0.848101	827.35	3.78952	2.96667	0.822857
827.392	1.41258	0.814159	0.598425	827.392	1.53085	0.906542	0.624309	827.392	1.75173	1.06863	0.683099	827.392	2.55079	1.80583	0.744966	827.392	2.73134	1.95833	0.773006	827.392	3.11074	2.40385	0.706897	827.392	3.02861	2.30534	0.72327	827.392	3.23999	2.39189	0.848101	827.392	3.71714	2.94	0.777143
827.435	1.28186	0.628319	0.653543	827.435	1.0015	0.476635	0.524862	827.435	1.50635	0.872549	0.633803	827.435	2.18857	1.43689	0.751678	827.435	2.30783	1.61458	0.693252	827.435	2.61273	1.92308	0.689655	827.435	2.69903	1.96947	0.72956	827.435	2.82834	2.08784	0.740506	827.435	3.29619	2.51333	0.782857
827.477	1.12055	0.522124	0.598425	827.477	1.18676	0.551402	0.635359	827.477	1.61019	0.941176	0.669014	827.477	2.01023	1.35922	0.651007	827.477	2.17299	1.51042	0.662577	827.477	2.49359	1.82692	0.666667	827.477	2.48389	1.85496	0.628931	827.477	2.67508	1.96622	0.708861	827.477	3.0781	2.38667	0.691429
827.519	1.27894	0.60177	0.677165	827.519	1.19187	0.523365	0.668508	827.519	1.62856	0.931373	0.697183	827.519	2.0765	1.29126	0.785235	827.519	2.24847	1.5	0.748466	827.519	2.55305	1.84615	0.706897	827.519	2.54275	1.83206	0.710692	827.519	2.68389	1.90541	0.778481	827.519	3.05429	2.3	0.754286
827.561	1.61041	0.823009	0.787402	827.561	1.40476	0.598131	0.80663	827.561	2.01629	1.10784	0.908451	827.561	2.23985	1.32039	0.919463	827.561	2.4074	1.46875	0.93865	827.561	2.67728	1.76923	0.908046	827.561	2.75342	1.8855	0.867924	827.561	2.91858	2.01351	0.905063	827.561	3.15238	2.26667	0.885714
827.603	1.10285	0.504425	0.598425	827.603	0.896164	0.327103	0.569061	827.603	1.48978	0.813725	0.676056	827.603	1.76881	0.990291	0.778524	827.603	1.75447	1.10417	0.650307	827.603	2.17396	1.40385	0.770115	827.603	2.24235	1.51908	0.72327	827.603	2.39933	1.70946	0.689873	827.603	2.66762	1.87333	0.794286
827.646	1.4275	0.663717	0.763779	827.646	1.53643	0.785047	0.751381	827.646	1.60619	0.901961	0.704225	827.646	2.07122	1.25243	0.818792	827.646	2.23076	1.42708	0.803681	827.646	2.45071	1.63461	0.816092	827.646	2.60435	1.71756	0.886792	827.646	2.55927	1.73649	0.822785	827.646	2.92381	2.06667	0.857143
827.688	1.25322	0.725664	0.527559	827.688	1.49218	0.906542	0.585635	827.688	1.55786	0.980392	0.577465	827.688	2.00424	1.33981	0.66443	827.688	2.09452	1.46875	0.625767	827.688	2.40528	1.77885	0.626437	827.688	2.43497	1.75572	0.679245	827.688	2.50616	1.7973	0.708861	827.688	2.72	2.08	0.64
827.73	1.62713	0.831858	0.795276	827.73	1.72634	0.925234	0.801105	827.73	1.86288	1.08824	0.774648	827.73	2.14146	1.34952	0.791946	827.73	2.43552	1.55208	0.883436	827.73	2.65429	1.76923	0.885057	827.73	2.57871	1.78626	0.792453	827.73	2.72648	1.87838	0.848101	827.73	2.85143	2.08	0.771429
827.772	1.09003	0.530973	0.559055	827.772	0.930552	0.411215	0.519337	827.772	1.07691	0.598039	0.478873	827.772	1.6383	0.980583	0.657718	827.772	1.679	1.11458	0.564417	827.772	1.82836	1.20192	0.626437	827.772	1.93965	1.33588	0.603774	827.772	2.081	1.47973	0.601266	827.772	2.19333	1.59333	0.6
827.814	1.23566	0.566372	0.669291	827.814	1.21562	0.635514	0.58011	827.814	1.47321	0.754902	0.71831	827.814	1.94057	1.15534	0.785235	827.814	1.95495	1.21875	0.736196	827.814	2.07803	1.36539	0.712644	827.814	2.19074	1.40458	0.786164	827.814	2.31055	1.50676	0.803798	827.814	2.45048	1.67333	0.777143
827.857	0.983695	0.566372	0.417323	827.857	0.988744	0.485981	0.502762	827.857	1.15507	0.72549	0.429578	827.857	1.67186	0.980583	0.691275	827.857	1.69741	1.11458	0.582822	827.857	1.89589	1.32692	0.568966	827.857	1.86015	1.31298	0.54717	827.857	2.04636	1.43243	0.613924	827.857	2.08095	1.52667	0.554286
827.899	1.16082	0.60177	0.559055	827.899	1.01255	0.476635	0.535912	827.899	1.32684	0.735294	0.591549	827.899	1.52864	0.951456	0.577181	827.899	1.75633	1.09375	0.662577	827.899	1.93026	1.29808	0.632184	827.899	1.99222	1.31298	0.679245	827.899	2.20629	1.45946	0.746835	827.899	2.16952	1.54667	0.622857
827.941	0.785172	0.265487	0.519685	827.941	0.760159	0.345794	0.414365	827.941	1.03369	0.519608	0.514085	827.941	1.07259	0.669903	0.402685	827.941	1.33698	0.864583	0.472393	827.941	1.52885	1.02885	0.5	827.941	1.57862	1	0.578616	827.941	1.70552	1.0473	0.658228	827.941	1.85524	1.22667	0.628571
827.983	1.52087	0.79646	0.72441	827.983	1.32653	0.663551	0.662983	827.983	1.63712	0.911765	0.725352	827.983	1.82707	1.04854	0.778524	827.983	2.0046	1.25	0.754601	827.983	2.07416	1.35577	0.718391	827.983	2.26842	1.48855	0.779874	827.983	2.42243	1.57432	0.848101	827.983	2.34286	1.6	0.742857
828.025	1.44324	0.663717	0.779528	828.025	1.11117	0.420561	0.690608	828.025	1.50994	0.735294	0.774648	828.025	1.67173	0.893204	0.778524	828.025	1.80611	1.02083	0.785276	828.025	1.89887	1.10577	0.793103	828.025	2.13241	1.25191	0.880503	828.025	2.16772	1.25	0.917721	828.025	2.27143	1.42	0.851429
828.067	1.08606	0.566372	0.519685	828.067	0.912686	0.448598	0.464088	828.067	1.21196	0.627451	0.584507	828.067	1.42712	0.883495	0.543624	828.067	1.6172	0.979167	0.638037	828.067	1.64401	1.08654	0.557471	828.067	1.70704	1.12214	0.584906	828.067	1.88924	1.25	0.63924	828.067	1.99714	1.3	0.697143
828.11	1.29768	0.557522	0.740158	828.11	1.15191	0.560748	0.59116	828.11	1.51547	0.754902	0.760563	828.11	1.73669	0.951456	0.785235	828.11	1.69325	1	0.693252	828.11	1.82228	1.11539	0.706897	828.11	1.97297	1.16794	0.805031	828.11	2.06688	1.25676	0.810127	828.11	2.14	1.34	0.8
828.152	1.01631	0.433628	0.582677	828.152	0.89446	0.336449	0.558011	828.152	1.17827	0.607843	0.570423	828.152	1.23738	0.660194	0.577181	828.152	1.44127	0.864583	0.576687	828.152	1.542	0.961538	0.58046	828.152	1.64377	0.977099	0.666667	828.152	1.84605	1.06757	0.778481	828.152	1.66	1.06	0.6
828.194	1.25023	0.769911	0.480315	828.194	1.08096	0.495327	0.585635	828.194	1.39699	0.784314	0.612676	828.194	1.57177	0.873786	0.697987	828.194	1.68897	0.989583	0.699387	828.194	1.7321	1.07692	0.655172	828.194	1.84805	1.24428	0.603774	828.194	1.87068	1.25676	0.613924	828.194	2.01714	1.36	0.657143
828.236	0.996516	0.539823	0.456693	828.236	0.83792	0.373832	0.464088	828.236	1.16266	0.627451	0.535211	828.236	1.3486	0.737864	0.610738	828.236	1.35308	0.739583	0.613497	828.236	1.43623	0.855769	0.58046	828.236	1.52201	1	0.522013	828.236	1.65027	1.07432	0.575949	828.236	1.77905	1.13333	0.645714
828.279	0.919797	0.486726	0.433071	828.279	1.30686	0.953271	0.353591	828.279	1.10729	0.705882	0.401409	828.279	1.4915	1.04854	0.442953	828.279	1.63292	1.16667	0.466258	828.279	1.57173	1.22115	0.350575	828.279	1.60373	1.10687	0.496855	828.279	1.69928	1.14865	0.550633	828.279	1.92381	1.34667	0.577143
828.321	1.34374	0.761062	0.582677	828.321	1.32736	0.719626	0.607735	828.321	1.48951	0.862745	0.626761	828.321	1.8025	1.07767	0.724832	828.321	1.81525	1.07292	0.742331	828.321	1.79962	1.20192	0.597701	828.321	1.8274	1.19847	0.628931	828.321	1.99307	1.29054	0.702532	828.321	2.05238	1.36667	0.685714
828.363	1.24347	0.637168	0.606299	828.363	1.11964	0.495327	0.624309	828.363	1.45305	0.833333	0.619718	828.363	1.57549	0.864078	0.711409	828.363	1.5811	0.90625	0.674847	828.363	1.60522	0.961538	0.643678	828.363	1.75064	1.08397	0.666667	828.363	1.83005	1.11486	0.71519	828.363	1.81429	1.14	0.674286
828.405	1.39997	0.628319	0.771653	828.405	1.25259	0.64486	0.607735	828.405	1.60273	0.764706	0.838028	828.405	1.72255	0.970874	0.751678	828.405	1.82637	1.01042	0.815951	828.405	1.7931	1	0.793103	828.405	2.02285	1.12977	0.893082	828.405	2.08536	1.14865	0.936709	828.405	2.23143	1.3	0.931429
828.447	1.02111	0.548673	0.472441	828.447	1.07497	0.588785	0.486188	828.447	1.06007	0.588235	0.471831	828.447	1.33003	0.786408	0.543624	828.447	1.22923	0.677083	0.552147	828.447	1.35179	0.817308	0.534483	828.447	1.50319	0.89313	0.610063	828.447	1.5928	0.966216	0.626582	828.447	1.58952	1.00667	0.582857
828.489	1.10682	0.469027	0.637795	828.489	1.02742	0.485981	0.541436	828.489	1.30475	0.656863	0.647887	828.489	1.44413	0.786408	0.657718	828.489	1.5995	0.90625	0.693252	828.489	1.48607	0.865385	0.62069	828.489	1.64602	0.954198	0.691824	828.489	1.79619	0.97973	0.816456	828.489	1.84476	1.07333	0.771429
828.532	0.985785	0.442478	0.543307	828.532	0.926266	0.495327	0.430939	828.532	1.03369	0.519608	0.514085	828.532	1.27106	0.747573	0.52349	828.532	1.42472	0.854167	0.570552	828.532	1.32692	0.826923	0.5	828.532	1.43315	0.816794	0.616352	828.532	1.51976	0.912162	0.607595	828.532	1.59905	0.993333	0.605714
828.574	1.27197	0.681416	0.590551	828.574	1.23731	0.607477	0.629834	828.574	1.47998	0.803922	0.676056	828.574	1.55978	0.834951	0.724832	828.574	1.64117	0.947917	0.693252	828.574	1.56267	0.855769	0.706897	828.574	1.76504	1.0229	0.742138	828.574	1.83254	1.05405	0.778481	828.574	1.78286	1.08	0.702857
828.616	1.28186	0.628319	0.653543	828.616	1.13322	0.542056	0.59116	828.616	1.37089	0.666667	0.704225	828.616	1.41728	0.786408	0.630872	828.616	1.55783	0.864583	0.693252	828.616	1.51481	0.865385	0.649425	828.616	1.73494	1.03053	0.704403	828.616	1.75488	1.02703	0.727848	828.616	1.68286	0.98	0.702857
828.658	1.40666	0.831858	0.574803	828.658	1.0933	0.457944	0.635359	828.658	1.49102	0.843137	0.647887	828.658	1.58591	0.854369	0.731544	828.658	1.56097	0.8125	0.748466	828.658	1.584	0.923077	0.660919	828.658	1.74929	1.07634	0.672956	828.658	1.79456	1.05405	0.740506	828.658	1.67238	1.02667	0.645714
828.7	0.954289	0.442478	0.511811	828.7	0.969174	0.53271	0.436464	828.7	1.13021	0.637255	0.492958	828.7	1.25836	0.728155	0.530201	828.7	1.40817	0.84375	0.564417	828.7	1.28846	0.788462	0.5	828.7	1.42503	0.877863	0.54717	828.7	1.42602	0.831081	0.594937	828.7	1.47238	0.946667	0.525714
828.743	0.917915	0.39823	0.519685	828.743	0.938607	0.457944	0.480663	828.743	1.0098	0.509804	0.5	828.743	1.09487	0.61165	0.483222	828.743	1.24565	0.791667	0.453988	828.743	1.20778	0.730769	0.477011	828.743	1.44347	0.839695	0.603774	828.743	1.4403	0.756757	0.683544	828.743	1.40762	0.813333	0.594286
828.785	1.3567	0.59292	0.763779	828.785	1.03981	0.327103	0.712707	828.785	1.54239	0.72549	0.816901	828.785	1.46771	0.601942	0.865772	828.785	1.3913	0.59375	0.797546	828.785	1.28946	0.548077	0.741379	828.785	1.66676	0.78626	0.880503	828.785	1.71126	0.837838	0.873418	828.785	1.68476	0.793333	0.891429
828.827	1.35468	0.646018	0.708661	828.827	1.27975	0.738318	0.541436	828.827	1.44629	0.784314	0.661972	828.827	1.59275	0.941747	0.651007	828.827	1.5547	0.916667	0.638037	828.827	1.71286	1.05769	0.655172	828.827	1.68553	1	0.685535	828.827	1.71767	0.939189	0.778481	828.827	1.79143	1.1	0.691429
828.869	1.64191	0.823009	0.818898	828.869	1.62524	0.813084	0.812155	828.869	1.78197	0.95098	0.830986	828.869	1.8919	1.01942	0.872483	828.869	1.84234	0.989583	0.852761	828.869	1.87566	1.04808	0.827586	828.869	1.91464	1.01527	0.899371	828.869	2.0461	1.12838	0.917721	828.869	2.12095	1.20667	0.914286
828.911	0.77904	0.495575	0.283465	828.911	0.857799	0.598131	0.259669	828.911	0.885529	0.568627	0.316901	828.911	1.075	0.786408	0.288591	828.911	1.18175	0.875	0.306748	828.911	1.20458	0.894231	0.310345	828.911	1.13712	0.778626	0.358491	828.911	1.23529	0.817568	0.417722	828.911	1.34952	0.966667	0.382857
828.954	1.01526	0.495575	0.519685	828.954	1.23385	0.747664	0.486188	828.954	1.19539	0.568627	0.626761	828.954	1.39571	0.825243	0.57047	828.954	1.28119	0.833333	0.447853	828.954	1.49956	0.884615	0.614943	828.954	1.5005	0.877863	0.622641	828.954	1.66447	0.898649	0.765823	828.954	1.54762	0.913333	0.634286
828.996	1.13908	0.690265	0.448819	828.996	1.23344	0.719626	0.513812	828.996	1.186	0.735294	0.450704	828.996	1.58761	0.990291	0.597315	828.996	1.6944	1.0625	0.631902	828.996	1.54797	1.01923	0.528736	828.996	1.53954	0.992366	0.54717	828.996	1.49829	0.972973	0.525316	828.996	1.68667	1.12667	0.56
829.038	0.951293	0.486726	0.464567	829.038	0.796664	0.448598	0.348066	829.038	1.00124	0.529412	0.471831	829.038	1.14426	0.728155	0.416107	829.038	1.17945	0.75	0.429448	829.038	1.19452	0.769231	0.425287	829.038	1.27956	0.694657	0.584906	829.038	1.44244	0.79054	0.651899	829.038	1.41143	0.88	0.531429
829.08	1.36736	0.761062	0.606299	829.08	1.25982	0.635514	0.624309	829.08	1.44049	0.813725	0.626761	829.08	1.63003	0.932039	0.697987	829.08	1.64245	0.90625	0.736196	829.08	1.64346	0.942308	0.701149	829.08	1.81847	1.07634	0.742138	829.08	1.83296	1.06081	0.772152	829.08	1.85048	1.07333	0.777143
829.122	1.14912	0.495575	0.653543	829.122	1.03935	0.420561	0.618784	829.122	1.25449	0.578431	0.676056	829.122	1.23138	0.640777	0.590604	829.122	1.29001	0.645833	0.644172	829.122	1.2458	0.653846	0.591954	829.122	1.41164	0.694657	0.716981	829.122	1.53062	0.783784	0.746835	829.122	1.58952	0.806667	0.782857
829.165	1.36938	0.707965	0.661417	829.165	1.36774	0.71028	0.657458	829.165	1.41535	0.77451	0.640845	829.165	1.58376	0.912621	0.671141	829.165	1.76687	1	0.766871	829.165	1.50906	0.865385	0.643678	829.165	1.67521	0.977099	0.698113	829.165	1.83715	1.02703	0.810127	829.165	1.70095	0.986667	0.714286
829.207	0.738834	0.345133	0.393701	829.207	0.695565	0.336449	0.359116	829.207	0.885115	0.392157	0.492958	829.207	0.94481	0.495146	0.449664	829.207	0.941718	0.5	0.441718	829.207	0.927166	0.490385	0.436782	829.207	1.11743	0.59542	0.522013	829.207	1.21485	0.594595	0.620253	829.207	1.2181	0.646667	0.571429
829.249	1.05156	0.610619	0.440945	829.249	1.26617	0.691589	0.574586	829.249	1.08644	0.656863	0.429578	829.249	1.31361	0.776699	0.536913	829.249	1.39417	0.75	0.644172	829.249	1.36317	0.788462	0.574713	829.249	1.43718	0.839695	0.597484	829.249	1.6164	0.939189	0.677215	829.249	1.55048	0.973333	0.577143
829.291	1.16863	0.672566	0.496063	829.291	1.22538	0.672897	0.552486	829.291	1.40224	0.852941	0.549296	829.291	1.44413	0.786408	0.657718	829.291	1.45725	0.84375	0.613497	829.291	1.43833	0.903846	0.534483	829.291	1.5584	0.992366	0.566038	829.291	1.63291	1	0.632911	829.291	1.62	0.98	0.64
829.333	1.07916	0.575221	0.503937	829.333	1.17184	0.663551	0.508287	829.333	1.20713	0.735294	0.471831	829.333	1.38014	0.883495	0.496644	829.333	1.41673	0.864583	0.552147	829.333	1.39257	0.961538	0.431034	829.333	1.36531	0.824427	0.54088	829.333	1.45561	0.898649	0.556962	829.333	1.44571	0.92	0.525714
829.375	1.06334	0.646018	0.417323	829.375	1.25172	0.71028	0.541436	829.375	1.26802	0.676471	0.591549	829.375	1.49052	0.893204	0.597315	829.375	1.58237	0.864583	0.717791	829.375	1.44584	0.865385	0.58046	829.375	1.58135	0.908397	0.672956	829.375	1.53703	0.885135	0.651899	829.375	1.62571	0.94	0.685714
829.418	1.34388	0.619469	0.72441	829.418	1.19058	0.560748	0.629834	829.418	1.37669	0.637255	0.739437	829.418	1.29165	0.553398	0.738255	829.418	1.42983	0.6875	0.742331	829.418	1.39523	0.653846	0.741379	829.418	1.55404	0.717557	0.836478	829.418	1.71545	0.804054	0.911392	829.418	1.66095	0.746667	0.914286
829.46	1.15107	0.513274	0.637795	829.46	0.770434	0.168224	0.60221	829.46	1.20423	0.5	0.704225	829.46	1.05565	0.31068	0.744966	829.46	1.04429	0.40625	0.638037	829.46	1.18358	0.413461	0.770115	829.46	1.34879	0.587786	0.761006	829.46	1.40139	0.641892	0.759494	829.46	1.25524	0.506667	0.748571
829.502	1.16382	0.557522	0.606299	829.502	1.19564	0.654206	0.541436	829.502	1.31883	0.656863	0.661972	829.502	1.23966	0.68932	0.550336	829.502	1.34637	0.708333	0.638037	829.502	1.37821	0.711538	0.666667	829.502	1.49561	0.778626	0.716981	829.502	1.61042	0.844595	0.765823	829.502	1.65524	0.826667	0.828571
829.544	1.04278	0.530973	0.511811	829.544	0.967471	0.542056	0.425414	829.544	1.10384	0.568627	0.535211	829.544	1.12387	0.553398	0.57047	829.544	1.17657	0.59375	0.582822	829.544	1.11152	0.605769	0.505747	829.544	1.22478	0.633588	0.591195	829.544	1.4403	0.756757	0.683544	829.544	1.31048	0.653333	0.657143
829.587	0.82057	0.300885	0.519685	829.587	0.814117	0.383178	0.430939	829.587	0.937172	0.401961	0.535211	829.587	0.907409	0.417476	0.489933	829.587	0.949131	0.458333	0.490797	829.587	1.03448	0.5	0.534483	829.587	1.07754	0.40458	0.672956	829.587	1.21776	0.54054	0.677215	829.587	1.20381	0.546667	0.657143
829.629	0.980768	0.539823	0.440945	829.629	1.10678	0.747664	0.359116	829.629	0.930544	0.578431	0.352113	829.629	1.21294	0.776699	0.436242	829.629	1.35723	0.854167	0.503068	829.629	1.26757	0.836538	0.431034	829.629	1.29075	0.793893	0.496855	829.629	1.35982	0.885135	0.474684	829.629	1.40095	0.846667	0.554286
829.671	0.641419	0.318584	0.322835	829.671	0.717199	0.429907	0.287293	829.671	0.781966	0.45098	0.330986	829.671	0.807584	0.485437	0.322148	829.671	0.918903	0.59375	0.325153	829.671	0.8834	0.567308	0.316092	829.671	0.835806	0.496183	0.339623	829.671	1.03849	0.608108	0.43038	829.671	0.940952	0.586667	0.354286
829.713	1.148	0.628319	0.519685	829.713	1.1294	0.53271	0.596685	829.713	1.33789	0.77451	0.56338	829.713	1.36203	0.737864	0.624161	829.713	1.43897	0.739583	0.699387	829.713	1.44164	0.769231	0.672414	829.713	1.31639	0.725191	0.591195	829.713	1.50539	0.885135	0.620253	829.713	1.43333	0.753333	0.68
829.755	0.985715	0.513274	0.472441	829.755	1.13781	0.728972	0.40884	829.755	1.07111	0.627451	0.443662	829.755	1.31218	0.815534	0.496644	829.755	1.40018	0.854167	0.546012	829.755	1.3078	0.836538	0.471264	829.755	1.24898	0.770992	0.477987	829.755	1.42816	0.864865	0.563291	829.755	1.43905	0.873333	0.565714
829.798	1.14717	0.477876	0.669291	829.798	0.918676	0.35514	0.563536	829.798	1.18462	0.480392	0.704225	829.798	1.14987	0.485437	0.66443	829.798	1.14174	0.479167	0.662577	829.798	1.07626	0.403846	0.672414	829.798	1.32632	0.603054	0.72327	829.798	1.45706	0.621622	0.835443	829.798	1.36095	0.526667	0.834286
829.84	1.50226	0.699115	0.80315	829.84	1.19657	0.46729	0.729282	829.84	1.50014	0.72549	0.774648	829.84	1.47599	0.650486	0.825503	829.84	1.5678	0.739583	0.828221	829.84	1.50995	0.596154	0.913793	829.84	1.6816	0.763359	0.918239	829.84	1.78977	0.878378	0.911392	829.84	1.56571	0.72	0.845714
829.882	1.17943	0.699115	0.480315	829.882	1.26488	0.728972	0.535912	829.882	1.09928	0.627451	0.471831	829.882	1.31146	0.834951	0.47651	829.882	1.44312	0.854167	0.588957	829.882	1.39401	0.836538	0.557471	829.882	1.30602	0.80916	0.496855	829.882	1.52694	0.925676	0.601266	829.882	1.53333	0.933333	0.6
829.924	1.10668	0.610619	0.496063	829.924	1.09666	0.560748	0.535912	829.924	1.24137	0.656863	0.584507	829.924	1.36203	0.737864	0.624161	829.924	1.37334	0.729167	0.644172	829.924	1.24591	0.682692	0.563218	829.924	1.34198	0.763359	0.578616	829.924	1.36563	0.777027	0.588608	829.924	1.34667	0.746667	0.6
829.966	1.07428	0.530973	0.543307	829.966	0.922497	0.364486	0.558011	829.966	1.14513	0.490196	0.65493	829.966	1.08419	0.446602	0.637584	829.966	1.2061	0.53125	0.674847	829.966	1.15329	0.509615	0.643678	829.966	1.29848	0.587786	0.710692	829.966	1.41661	0.682432	0.734177	829.966	1.34	0.58	0.76
830.008	1.77869	0.849557	0.929134	830.008	1.60572	0.738318	0.867403	830.008	1.77672	0.882353	0.894366	830.008	1.88434	0.951456	0.932886	830.008	1.77499	0.885417	0.889571	830.008	1.85599	0.913462	0.942529	830.008	1.88233	0.938931	0.943396	830.008	1.96031	0.972973	0.987342	830.008	2.02571	1.06	0.965714
830.051	0.990663	0.486726	0.503937	830.051	0.995508	0.570094	0.425414	830.051	1.01257	0.519608	0.492958	830.051	1.18069	0.650486	0.530201	830.051	1.2268	0.65625	0.570552	830.051	1.11726	0.605769	0.511494	830.051	1.14705	0.656489	0.490566	830.051	1.41199	0.70946	0.702532	830.051	1.3181	0.706667	0.611429
830.093	1.29364	0.663717	0.629921	830.093	1.15619	0.476635	0.679558	830.093	1.55896	0.784314	0.774648	830.093	1.49169	0.679612	0.812081	830.093	1.50345	0.6875	0.815951	830.093	1.57394	0.798077	0.775862	830.093	1.58769	0.801527	0.786164	830.093	1.62479	0.871622	0.753165	830.093	1.49429	0.78	0.714286
830.135	1.51697	0.761062	0.755906	830.135	1.25306	0.551402	0.701658	830.135	1.53259	0.715686	0.816901	830.135	1.50968	0.737864	0.771812	830.135	1.60091	0.760417	0.840491	830.135	1.5336	0.769231	0.764368	830.135	1.70359	0.816794	0.886792	830.135	1.7902	0.885135	0.905063	830.135	1.68476	0.833333	0.851429
830.177	1.01819	0.522124	0.496063	830.177	0.925027	0.411215	0.513812	830.177	1.04598	0.588235	0.457747	830.177	1.16583	0.68932	0.47651	830.177	1.18015	0.677083	0.503068	830.177	1.25188	0.740385	0.511494	830.177	1.23597	0.732824	0.503145	830.177	1.25718	0.763513	0.493671	830.177	1.33333	0.813333	0.52
830.219	1.01233	0.469027	0.543307	830.219	0.950483	0.514019	0.436464	830.219	1.03245	0.490196	0.542254	830.219	1.2448	0.640777	0.604027	830.219	1.29914	0.697917	0.601227	830.219	1.2384	0.721154	0.517241	830.219	1.33933	0.641221	0.698113	830.219	1.44406	0.716216	0.727848	830.219	1.42286	0.76	0.662857
830.262	1.30242	0.743363	0.559055	830.262	1.39108	0.794392	0.596685	830.262	1.30572	0.735294	0.570423	830.262	1.61732	0.912621	0.704698	830.262	1.61235	0.9375	0.674847	830.262	1.59936	0.932692	0.666667	830.262	1.60877	0.885496	0.72327	830.262	1.73751	0.952703	0.78481	830.262	1.63333	0.873333	0.76
830.304	0.914919	0.442478	0.472441	830.304	0.873599	0.420561	0.453039	830.304	1.08575	0.529412	0.556338	830.304	1.0993	0.582524	0.516779	830.304	1.13676	0.541667	0.595092	830.304	1.02509	0.548077	0.477011	830.304	1.22344	0.625954	0.597484	830.304	1.29336	0.635135	0.658228	830.304	1.1781	0.606667	0.571429
830.346	0.831162	0.539823	0.291339	830.346	0.916043	0.551402	0.364641	830.346	0.994615	0.705882	0.288732	830.346	1.16296	0.76699	0.395973	830.346	1.11267	0.677083	0.435583	830.346	1.1387	0.701923	0.436782	830.346	1.05852	0.725191	0.333333	830.346	1.21801	0.844595	0.373418	830.346	1.27333	0.833333	0.44
830.388	1.28186	0.628319	0.653543	830.388	1.1328	0.514019	0.618784	830.388	1.25449	0.578431	0.676056	830.388	1.32834	0.650486	0.677852	830.388	1.34279	0.625	0.717791	830.388	1.32228	0.615385	0.706897	830.388	1.4705	0.671756	0.798742	830.388	1.53943	0.722973	0.816456	830.388	1.42571	0.66	0.765714
830.43	0.977841	0.513274	0.464567	830.43	0.973821	0.598131	0.375691	830.43	0.992682	0.54902	0.443662	830.43	1.01961	0.650486	0.369127	830.43	1.02991	0.625	0.404908	830.43	1.14069	0.721154	0.41954	830.43	1.06352	0.610687	0.45283	830.43	1.29678	0.689189	0.607595	830.43	1.25048	0.713333	0.537143
830.473	1.33196	0.725664	0.606299	830.473	1.15743	0.560748	0.596685	830.473	1.28031	0.745098	0.535211	830.473	1.41428	0.776699	0.637584	830.473	1.50147	0.802083	0.699387	830.473	1.48022	0.836538	0.643678	830.473	1.53286	0.847328	0.685535	830.473	1.60503	0.95946	0.64557	830.473	1.58857	0.96	0.628571
830.515	1.48059	0.716814	0.763779	830.515	1.38684	0.757009	0.629834	830.515	1.51823	0.764706	0.753521	830.515	1.52994	0.825243	0.704698	830.515	1.6002	0.833333	0.766871	830.515	1.68546	0.903846	0.781609	830.515	1.61645	0.78626	0.830189	830.515	1.72143	0.898649	0.822785	830.515	1.77429	0.94	0.834286
830.557	1.23552	0.707965	0.527559	830.557	1.29504	0.775701	0.519337	830.557	1.15382	0.696078	0.457747	830.557	1.43012	0.893204	0.536913	830.557	1.5841	0.958333	0.625767	830.557	1.4958	0.903846	0.591954	830.557	1.48749	0.839695	0.647799	830.557	1.58348	0.918919	0.664557	830.557	1.43429	0.88	0.554286
830.599	0.870671	0.39823	0.472441	830.599	1.01167	0.542056	0.469613	830.599	1.07871	0.529412	0.549296	830.599	1.01264	0.475728	0.536913	830.599	1.04959	0.583333	0.466258	830.599	1.12677	0.586538	0.54023	830.599	1.19963	0.633588	0.566038	830.599	1.27095	0.581081	0.689873	830.599	1.23524	0.606667	0.628571
830.641	1.06648	0.460177	0.606299	830.641	1.2037	0.700935	0.502762	830.641	1.15162	0.588235	0.56338	830.641	1.31433	0.757282	0.557047	830.641	1.36778	0.760417	0.607362	830.641	1.36693	0.769231	0.597701	830.641	1.32133	0.717557	0.603774	830.641	1.49726	0.756757	0.740506	830.641	1.56667	0.886667	0.68
830.683	1.07923	0.504425	0.574803	830.683	0.924614	0.383178	0.541436	830.683	1.17178	0.509804	0.661972	830.683	1.12159	0.524272	0.597315	830.683	1.2091	0.583333	0.625767	830.683	1.05714	0.413461	0.643678	830.683	1.21268	0.564886	0.647799	830.683	1.46049	0.675676	0.78481	830.683	1.34476	0.613333	0.731429
830.726	0.983834	0.424779	0.559055	830.726	0.806062	0.336449	0.469613	830.726	0.954294	0.362745	0.591549	830.726	0.912686	0.456311	0.456376	830.726	1.06442	0.5	0.564417	830.726	0.976901	0.471154	0.505747	830.726	1.12511	0.496183	0.628931	830.726	1.19073	0.513513	0.677215	830.726	1.23714	0.54	0.697143
830.768	0.981813	0.477876	0.503937	830.768	0.882945	0.429907	0.453039	830.768	1.0573	0.578431	0.478873	830.768	1.16427	0.640777	0.52349	830.768	1.16488	0.625	0.539877	830.768	1.07891	0.596154	0.482759	830.768	1.23467	0.618321	0.616352	830.768	1.40523	0.702703	0.702532	830.768	1.27905	0.713333	0.565714
830.81	1.22667	0.699115	0.527559	830.81	1.11705	0.570094	0.546961	830.81	1.31856	0.705882	0.612676	830.81	1.36574	0.728155	0.637584	830.81	1.39603	0.739583	0.656442	830.81	1.43225	0.817308	0.614943	830.81	1.40396	0.793893	0.610063	830.81	1.52899	0.858108	0.670886	830.81	1.43905	0.793333	0.645714
830.852	1.44317	0.734513	0.708661	830.852	1.40595	0.803738	0.60221	830.852	1.54612	0.813725	0.732394	830.852	1.5532	0.92233	0.630872	830.852	1.63376	0.989583	0.644172	830.852	1.63771	0.942308	0.695402	830.852	1.67795	0.885496	0.792453	830.852	1.82569	0.945946	0.879747	830.852	1.75238	0.986667	0.765714
830.894	1.32116	0.699115	0.622047	830.894	1.08948	0.448598	0.640884	830.894	1.36385	0.666667	0.697183	830.894	1.30964	0.61165	0.697987	830.894	1.46293	0.708333	0.754601	830.894	1.31278	0.634615	0.678161	830.894	1.34471	0.671756	0.672956	830.894	1.59348	0.777027	0.816456	830.894	1.48762	0.773333	0.714286
830.937	0.853947	0.389381	0.464567	830.937	0.888005	0.523365	0.364641	830.937	0.949185	0.519608	0.429578	830.937	1.05389	0.631068	0.422819	830.937	1.08199	0.677083	0.404908	830.937	0.944629	0.548077	0.396552	830.937	1.05368	0.519084	0.534591	830.937	1.23135	0.655405	0.575949	830.937	1.22095	0.706667	0.514286
830.979	1.36325	0.938053	0.425197	830.979	1.65699	1.09346	0.563536	830.979	1.48647	0.901961	0.584507	830.979	1.64058	1.00971	0.630872	830.979	1.89545	1.20833	0.687117	830.979	1.81874	1.19231	0.626437	830.979	1.62082	1.06107	0.559748	830.979	1.72879	1.11486	0.613924	830.979	1.78095	1.18667	0.594286
831.021	1.16271	0.690265	0.472441	831.021	1.20158	0.682243	0.519337	831.021	1.36606	0.77451	0.591549	831.021	1.45012	0.805825	0.644295	831.021	1.4297	0.791667	0.638037	831.021	1.45159	0.865385	0.586207	831.021	1.49335	0.801527	0.691824	831.021	1.52438	0.885135	0.63924	831.021	1.54667	0.866667	0.68
831.063	1.38415	0.699115	0.685039	831.063	1.24583	0.560748	0.685083	831.063	1.52375	0.784314	0.739437	831.063	1.46413	0.699029	0.765101	831.063	1.60762	0.791667	0.815951	831.063	1.45281	0.682692	0.770115	831.063	1.56882	0.801527	0.767296	831.063	1.62855	0.831081	0.797468	831.063	1.58667	0.826667	0.76
831.106	0.857919	0.353982	0.503937	831.106	0.652295	0.149533	0.502762	831.106	1.02044	0.372549	0.647887	831.106	0.72809	0.184466	0.543624	831.106	0.848799	0.229167	0.619632	831.106	0.907162	0.269231	0.637931	831.106	1.18263	0.465649	0.716981	831.106	1.14429	0.47973	0.664557	831.106	1.10476	0.373333	0.731429
831.148	1.41474	0.619469	0.795276	831.148	1.38519	0.64486	0.740332	831.148	1.5243	0.686275	0.838028	831.148	1.52453	0.699029	0.825503	831.148	1.5347	0.71875	0.815951	831.148	1.53316	0.653846	0.87931	831.148	1.58054	0.725191	0.855346	831.148	1.6365	0.756757	0.879747	831.148	1.61619	0.713333	0.902857
831.19	1.32026	0.619469	0.700787	831.19	1.10776	0.439252	0.668508	831.19	1.37918	0.696078	0.683099	831.19	1.46999	0.631068	0.838926	831.19	1.40101	0.677083	0.723926	831.19	1.34715	0.605769	0.741379	831.19	1.43948	0.709924	0.72956	831.19	1.58082	0.777027	0.803798	831.19	1.46476	0.653333	0.811428
831.232	0.704411	0.318584	0.385827	831.232	0.69004	0.336449	0.353591	831.232	0.792323	0.362745	0.429578	831.232	0.852284	0.456311	0.395973	831.232	0.944146	0.520833	0.423313	831.232	0.831123	0.423077	0.408046	831.232	0.967017	0.419847	0.54717	831.232	1.02951	0.466216	0.563291	831.232	1.00762	0.493333	0.514286
831.274	1.02411	0.504425	0.519685	831.274	1.05928	0.523365	0.535912	831.274	1.13629	0.558824	0.577465	831.274	1.20968	0.592233	0.61745	831.274	1.32611	0.71875	0.607362	831.274	1.30139	0.663462	0.637931	831.274	1.31283	0.633588	0.679245	831.274	1.39557	0.75	0.64557	831.274	1.34476	0.693333	0.651429
831.317	1.50812	0.752212	0.755906	831.317	1.5054	0.803738	0.701658	831.317	1.57829	0.852941	0.725352	831.317	1.64032	0.834951	0.805369	831.317	1.76329	0.916667	0.846626	831.317	1.76415	0.942308	0.821839	831.317	1.75342	0.885496	0.867924	831.317	1.87042	0.952703	0.917721	831.317	1.75048	0.893333	0.857143
831.359	1.02808	0.469027	0.559055	831.359	0.764445	0.261682	0.502762	831.359	0.959818	0.382353	0.577465	831.359	0.91399	0.330097	0.583893	831.359	0.992076	0.458333	0.533742	831.359	0.945844	0.365385	0.58046	831.359	1.13366	0.473282	0.660377	831.359	1.14215	0.445946	0.696202	831.359	1.20667	0.446667	0.76
831.401	1.28981	0.557522	0.732283	831.401	1.1549	0.514019	0.640884	831.401	1.44131	0.666667	0.774648	831.401	1.29621	0.61165	0.684564	831.401	1.34592	0.572917	0.773006	831.401	1.34339	0.625	0.718391	831.401	1.4862	0.725191	0.761006	831.401	1.5597	0.743243	0.816456	831.401	1.51619	0.693333	0.822857
831.443	1.13525	0.584071	0.551181	831.443	1.15526	0.663551	0.491713	831.443	1.17799	0.656863	0.521127	831.443	1.34033	0.68932	0.651007	831.443	1.25805	0.6875	0.570552	831.443	1.36494	0.75	0.614943	831.443	1.3366	0.732824	0.603774	831.443	1.46356	0.824324	0.63924	831.443	1.45238	0.806667	0.645714
831.485	0.644415	0.274336	0.370079	831.485	0.694687	0.401869	0.292818	831.485	0.738746	0.372549	0.366197	831.485	0.894116	0.504854	0.389262	831.485	0.903055	0.510417	0.392638	831.485	0.786804	0.355769	0.431034	831.485	0.869989	0.40458	0.465409	831.485	0.938334	0.425676	0.512658	831.485	0.971429	0.52	0.451429
831.528	0.982858	0.415929	0.566929	831.528	0.866422	0.308411	0.558011	831.528	1.07222	0.431373	0.640845	831.528	1.05649	0.378641	0.677852	831.528	1.12705	0.458333	0.668712	831.528	0.959107	0.326923	0.632184	831.528	1.27471	0.48855	0.786164	831.528	1.26163	0.533784	0.727848	831.528	1.28286	0.5	0.782857
831.57	1.49725	0.79646	0.700787	831.57	1.43063	0.728972	0.701658	831.57	1.50511	0.843137	0.661972	831.57	1.46641	0.728155	0.738255	831.57	1.72463	0.927083	0.797546	831.57	1.56057	0.807692	0.752873	831.57	1.58092	0.870229	0.710692	831.57	1.67927	0.932432	0.746835	831.57	1.61238	0.886667	0.725714
831.612	0.849976	0.424779	0.425197	831.612	0.806475	0.364486	0.441989	831.612	0.779481	0.392157	0.387324	831.612	0.937382	0.514563	0.422819	831.612	0.985238	0.53125	0.453988	831.612	0.930813	0.442308	0.488506	831.612	1.00965	0.519084	0.490566	831.612	1.09707	0.533784	0.563291	831.612	1.08286	0.54	0.542857
831.654	1.27991	0.610619	0.669291	831.654	1.05597	0.299065	0.756906	831.654	1.31911	0.607843	0.711268	831.654	1.35649	0.524272	0.832215	831.654	1.33065	0.520833	0.809816	831.654	1.24878	0.432692	0.816092	831.654	1.47679	0.671756	0.805031	831.654	1.47314	0.675676	0.797468	831.654	1.32857	0.54	0.788571
831.696	1.22876	0.575221	0.653543	831.696	1.22626	0.607477	0.618784	831.696	1.24165	0.607843	0.633803	831.696	1.1887	0.524272	0.66443	831.696	1.22751	0.583333	0.644172	831.696	1.26249	0.509615	0.752873	831.696	1.52033	0.740458	0.779874	831.696	1.43602	0.689189	0.746835	831.696	1.42571	0.66	0.765714
831.738	0.73089	0.415929	0.314961	831.738	0.716838	0.280374	0.436464	831.738	0.777962	0.411765	0.366197	831.738	0.916401	0.446602	0.469799	831.738	0.895769	0.447917	0.447853	831.738	0.911693	0.451923	0.45977	831.738	1.00562	0.496183	0.509434	831.738	1.09246	0.560811	0.531646	831.738	0.964762	0.513333	0.451429
831.781	1.21699	0.539823	0.677165	831.781	1.02194	0.364486	0.657458	831.781	1.30075	0.617647	0.683099	831.781	1.2364	0.504854	0.731544	831.781	1.2576	0.552083	0.705522	831.781	1.22414	0.5	0.724138	831.781	1.39863	0.656489	0.742138	831.781	1.55713	0.702703	0.85443	831.781	1.39238	0.626667	0.765714
831.823	1.03986	0.504425	0.535433	831.823	0.992565	0.495327	0.497238	831.823	1.24537	0.696078	0.549296	831.823	1.20382	0.660194	0.543624	831.823	1.23051	0.635417	0.595092	831.823	1.20944	0.663462	0.545977	831.823	1.28134	0.740458	0.54088	831.823	1.30525	0.722973	0.582279	831.823	1.28381	0.666667	0.617143
831.865	1.20514	0.575221	0.629921	831.865	1.16337	0.588785	0.574586	831.865	1.25394	0.676471	0.577465	831.865	1.28064	0.669903	0.610738	831.865	1.35679	0.71875	0.638037	831.865	1.44949	0.817308	0.632184	831.865	1.46373	0.740458	0.72327	831.865	1.57792	0.831081	0.746835	831.865	1.48	0.76	0.72
831.907	1.13706	0.743363	0.393701	831.907	1.09836	0.551402	0.546961	831.907	1.22798	0.784314	0.443662	831.907	1.40829	0.757282	0.651007	831.907	1.41373	0.8125	0.601227	831.907	1.36152	0.855769	0.505747	831.907	1.3716	0.824427	0.54717	831.907	1.42773	0.858108	0.56962	831.907	1.31905	0.793333	0.525714
831.949	1.45795	0.725664	0.732283	831.949	1.26328	0.495327	0.767956	831.949	1.58313	0.745098	0.838028	831.949	1.61849	0.699029	0.919463	831.949	1.68124	0.791667	0.889571	831.949	1.48519	0.634615	0.850575	831.949	1.68246	0.839695	0.842767	831.949	1.78045	0.831081	0.949367	831.949	1.61429	0.74	0.874286
831.992	0.943488	0.415929	0.527559	831.992	0.840037	0.392523	0.447514	831.992	0.998757	0.470588	0.528169	831.992	1.03206	0.495146	0.536913	831.992	1.13363	0.59375	0.539877	831.992	1.05183	0.528846	0.522988	831.992	1.17092	0.541985	0.628931	831.992	1.30474	0.614865	0.689873	831.992	1.17429	0.58	0.594286
832.034	0.992683	0.433628	0.559055	832.034	0.951774	0.476635	0.475138	832.034	1.01008	0.460784	0.549296	832.034	1.15971	0.582524	0.577181	832.034	1.20539	0.604167	0.601227	832.034	1.13053	0.567308	0.563218	832.034	1.27918	0.549618	0.72956	832.034	1.41704	0.689189	0.727848	832.034	1.32762	0.613333	0.714286
832.076	0.912828	0.566372	0.346457	832.076	1.0333	0.635514	0.39779	832.076	0.87752	0.490196	0.387324	832.076	1.10614	0.669903	0.436242	832.076	1.25978	0.78125	0.478528	832.076	1.09847	0.701923	0.396552	832.076	1.13313	0.648855	0.484277	832.076	1.30277	0.783784	0.518987	832.076	1.20952	0.746667	0.462857
832.118	1.17072	0.548673	0.622047	832.118	1.00702	0.476635	0.530387	832.118	1.28266	0.578431	0.704225	832.118	1.20825	0.631068	0.577181	832.118	1.17242	0.479167	0.693252	832.118	1.24746	0.586538	0.660919	832.118	1.3389	0.603054	0.735849	832.118	1.38787	0.628378	0.759494	832.118	1.25905	0.573333	0.685714
832.16	1.39001	0.752212	0.637795	832.16	1.25471	0.663551	0.59116	832.16	1.40735	0.696078	0.711268	832.16	1.53965	0.834951	0.704698	832.16	1.52473	0.84375	0.680982	832.16	1.59914	0.875	0.724138	832.16	1.63887	0.877863	0.761006	832.16	1.66319	0.878378	0.78481	832.16	1.66381	0.886667	0.777143
832.202	1.17859	0.548673	0.629921	832.202	1.06015	0.457944	0.60221	832.202	1.27686	0.607843	0.669014	832.202	1.38646	0.621359	0.765101	832.202	1.30112	0.583333	0.717791	832.202	1.26105	0.634615	0.626437	832.202	1.47093	0.709924	0.761006	832.202	1.57954	0.756757	0.822785	832.202	1.50571	0.7	0.805714
832.245	0.780155	0.362832	0.417323	832.245	0.861672	0.485981	0.375691	832.245	0.890362	0.460784	0.429578	832.245	0.7709	0.38835	0.38255	832.245	0.857106	0.458333	0.398773	832.245	0.973475	0.576923	0.396552	832.245	1.06985	0.503817	0.566038	832.245	1.18277	0.587838	0.594937	832.245	1.05714	0.52	0.537143
832.287	1.19727	0.575221	0.622047	832.287	1.29209	0.700935	0.59116	832.287	1.33112	0.72549	0.605634	832.287	1.58148	0.883495	0.697987	832.287	1.42785	0.802083	0.625767	832.287	1.43026	0.798077	0.632184	832.287	1.45475	0.725191	0.72956	832.287	1.60152	0.804054	0.797468	832.287	1.6219	0.833333	0.788571
832.329	1.1942	0.690265	0.503937	832.329	1.08566	0.439252	0.646409	832.329	1.42792	0.794118	0.633803	832.329	1.45514	0.669903	0.785235	832.329	1.31039	0.53125	0.779141	832.329	1.28017	0.625	0.655172	832.329	1.43631	0.763359	0.672956	832.329	1.52181	0.844595	0.677215	832.329	1.41429	0.74	0.674286
832.371	1.11853	0.575221	0.543307	832.371	1.15955	0.579439	0.58011	832.371	1.2034	0.647059	0.556338	832.371	1.24923	0.61165	0.637584	832.371	1.36791	0.65625	0.711657	832.371	1.3225	0.673077	0.649425	832.371	1.45158	0.778626	0.672956	832.371	1.42636	0.736487	0.689873	832.371	1.39048	0.733333	0.657143
832.413	1.16974	0.539823	0.629921	832.413	1.25342	0.700935	0.552486	832.413	1.17426	0.568627	0.605634	832.413	1.37317	0.708738	0.66443	832.413	1.32311	0.666667	0.656442	832.413	1.38207	0.721154	0.660919	832.413	1.37793	0.717557	0.660377	832.413	1.56945	0.797297	0.772152	832.413	1.41524	0.706667	0.708571
832.456	1.27113	0.530973	0.740158	832.456	1.30655	0.682243	0.624309	832.456	1.46824	0.637255	0.830986	832.456	1.38275	0.631068	0.751678	832.456	1.46479	0.697917	0.766871	832.456	1.40307	0.701923	0.701149	832.456	1.58505	0.679389	0.90566	832.456	1.61914	0.682432	0.936709	832.456	1.59143	0.7	0.891429
832.498	1.17051	0.761062	0.409449	832.498	1.31543	0.785047	0.530387	832.498	1.35998	0.852941	0.507042	832.498	1.44654	0.902913	0.543624	832.498	1.57924	0.916667	0.662577	832.498	1.46132	0.903846	0.557471	832.498	1.40256	0.89313	0.509434	832.498	1.56457	1.02027	0.544304	832.498	1.47333	0.873333	0.6
832.54	1.19323	0.681416	0.511811	832.54	1.12687	0.485981	0.640884	832.54	1.32684	0.735294	0.591549	832.54	1.27608	0.61165	0.66443	832.54	1.31582	0.604167	0.711657	832.54	1.33002	0.634615	0.695402	832.54	1.49469	0.80916	0.685535	832.54	1.51753	0.777027	0.740506	832.54	1.48	0.76	0.72
832.582	1.29468	0.60177	0.692913	832.582	1.06356	0.439252	0.624309	832.582	1.24468	0.568627	0.676056	832.582	1.34991	0.61165	0.738255	832.582	1.24105	0.541667	0.699387	832.582	1.28183	0.557692	0.724138	832.582	1.36046	0.618321	0.742138	832.582	1.47229	0.662162	0.810127	832.582	1.39238	0.626667	0.765714
832.625	1.14124	0.495575	0.645669	832.625	1.02783	0.514019	0.513812	832.625	1.19815	0.578431	0.619718	832.625	1.29406	0.669903	0.624161	832.625	1.24035	0.614583	0.625767	832.625	1.26857	0.596154	0.672414	832.625	1.53877	0.70229	0.836478	832.625	1.39591	0.655405	0.740506	832.625	1.46286	0.68	0.782857
832.667	1.18166	0.433628	0.748031	832.667	1.00537	0.364486	0.640884	832.667	1.20298	0.470588	0.732394	832.667	1.13631	0.398058	0.738255	832.667	1.07196	0.354167	0.717791	832.667	1.09328	0.346154	0.747127	832.667	1.23563	0.480916	0.754717	832.667	1.45322	0.560811	0.892405	832.667	1.28857	0.46	0.828571
832.709	1.26416	0.610619	0.653543	832.709	1.23731	0.607477	0.629834	832.709	1.3905	0.686275	0.704225	832.709	1.46713	0.708738	0.758389	832.709	1.46651	0.791667	0.674847	832.709	1.43767	0.730769	0.706897	832.709	1.51001	0.717557	0.792453	832.709	1.68004	0.844595	0.835443	832.709	1.52857	0.78	0.748571
832.751	1.57808	0.672566	0.905512	832.751	1.43409	0.588785	0.845304	832.751	1.64526	0.715686	0.929577	832.751	1.61022	0.650486	0.959731	832.751	1.59733	0.677083	0.920245	832.751	1.6733	0.730769	0.942529	832.751	1.77997	0.78626	0.993711	832.751	1.86016	0.79054	1.06962	832.751	1.74095	0.666667	1.07429
832.793	1.38624	0.575221	0.811024	832.793	1.14003	0.504673	0.635359	832.793	1.45443	0.588235	0.866197	832.793	1.32006	0.601942	0.718121	832.793	1.25275	0.510417	0.742331	832.793	1.38152	0.576923	0.804598	832.793	1.54554	0.633588	0.91195	832.793	1.58921	0.70946	0.879747	832.793	1.60857	0.66	0.948571
832.835	1.65368	0.858407	0.795276	832.835	1.49269	0.691589	0.801105	832.835	1.65576	0.852941	0.802817	832.835	1.74699	0.854369	0.892617	832.835	1.77071	0.875	0.895706	832.835	1.73508	0.855769	0.87931	832.835	1.74396	0.938931	0.805031	832.835	1.78857	0.95946	0.829114	832.835	1.8019	0.933333	0.868571
832.878	1.37238	0.663717	0.708661	832.878	1.25136	0.560748	0.690608	832.878	1.42847	0.696078	0.732394	832.878	1.57008	0.737864	0.832215	832.878	1.63829	0.791667	0.846626	832.878	1.48154	0.682692	0.798851	832.878	1.50012	0.732824	0.767296	832.878	1.62812	0.824324	0.803798	832.878	1.61524	0.826667	0.788571
832.92	0.963138	0.451327	0.511811	832.92	0.979398	0.476635	0.502762	832.92	1.07194	0.480392	0.591549	832.92	1.15071	0.553398	0.597315	832.92	1.13976	0.59375	0.546012	832.92	1.19938	0.538462	0.660919	832.92	1.30971	0.580153	0.72956	832.92	1.43431	0.662162	0.772152	832.92	1.30762	0.553333	0.754286
832.962	1.3705	0.575221	0.795276	832.962	1.26581	0.542056	0.723757	832.962	1.42419	0.705882	0.71831	832.962	1.37675	0.61165	0.765101	832.962	1.45622	0.677083	0.779141	832.962	1.51216	0.673077	0.839081	832.962	1.4777	0.641221	0.836478	832.962	1.67405	0.75	0.924051	832.962	1.52286	0.7	0.822857
833.004	1.07449	0.318584	0.755906	833.004	0.916972	0.364486	0.552486	833.004	1.12055	0.352941	0.767606	833.004	0.898286	0.300971	0.597315	833.004	1.01917	0.375	0.644172	833.004	0.907051	0.240385	0.666667	833.004	1.20918	0.366412	0.842767	833.004	1.29781	0.405405	0.892405	833.004	1.34476	0.493333	0.851429
833.046	1.68218	0.902655	0.779528	833.046	1.25141	0.439252	0.812155	833.046	1.657	0.882353	0.774648	833.046	1.58937	0.669903	0.919463	833.046	1.58634	0.635417	0.95092	833.046	1.56587	0.692308	0.873563	833.046	1.67526	0.870229	0.805031	833.046	1.64839	0.844595	0.803798	833.046	1.61143	0.8	0.811428
833.089	0.990732	0.415929	0.574803	833.089	0.852791	0.383178	0.469613	833.089	0.947528	0.313725	0.633803	833.089	0.92826	0.398058	0.530201	833.089	1.01719	0.489583	0.527607	833.089	1.10334	0.471154	0.632184	833.089	1.11839	0.458015	0.660377	833.089	1.29961	0.533784	0.765823	833.089	1.1619	0.453333	0.708571
833.131	1.51397	0.80531	0.708661	833.131	1.4251	0.728972	0.696133	833.131	1.50262	0.784314	0.71831	833.131	1.54851	0.776699	0.771812	833.131	1.77684	0.875	0.901841	833.131	1.61229	0.807692	0.804598	833.131	1.61866	0.870229	0.748428	833.131	1.76155	0.932432	0.829114	833.131	1.60095	0.886667	0.714286
833.173	0.929622	0.504425	0.425197	833.173	0.867662	0.392523	0.475138	833.173	1.04902	0.54902	0.5	833.173	1.0275	0.436893	0.590604	833.173	0.998211	0.458333	0.539877	833.173	0.990385	0.490385	0.5	833.173	1.16506	0.580153	0.584906	833.173	1.24016	0.594595	0.64557	833.173	1.14667	0.546667	0.6
833.215	1.21796	0.548673	0.669291	833.215	1.16342	0.46729	0.696133	833.215	1.39782	0.637255	0.760563	833.215	1.26181	0.543689	0.718121	833.215	1.29441	0.552083	0.742331	833.215	1.30283	0.538462	0.764368	833.215	1.54866	0.687023	0.861635	833.215	1.62	0.695946	0.924051	833.215	1.42476	0.653333	0.771429
833.257	1.07609	0.690265	0.385827	833.257	1.09108	0.682243	0.40884	833.257	1.12138	0.705882	0.415493	833.257	1.2248	0.728155	0.496644	833.257	1.26291	0.729167	0.533742	833.257	1.35002	0.855769	0.494253	833.257	1.2063	0.778626	0.427673	833.257	1.36991	0.844595	0.525316	833.257	1.2581	0.846667	0.411429
833.3	1.18152	0.575221	0.606299	833.3	1.06821	0.504673	0.563536	833.3	1.32436	0.676471	0.647887	833.3	1.26194	0.631068	0.630872	833.3	1.23179	0.59375	0.638037	833.3	1.28039	0.682692	0.597701	833.3	1.38782	0.70229	0.685535	833.3	1.4787	0.763513	0.71519	833.3	1.40762	0.693333	0.714286
833.342	1.41558	0.769911	0.645669	833.342	1.44085	0.672897	0.767956	833.342	1.53908	0.813725	0.725352	833.342	1.63876	0.786408	0.852349	833.342	1.60947	0.78125	0.828221	833.342	1.60091	0.836538	0.764368	833.342	1.69682	0.885496	0.811321	833.342	1.74675	0.898649	0.848101	833.342	1.69333	0.853333	0.84
833.384	0.824402	0.40708	0.417323	833.384	0.924975	0.53271	0.392265	833.384	0.906932	0.519608	0.387324	833.384	1.05017	0.640777	0.409396	833.384	1.18814	0.666667	0.521472	833.384	1.12699	0.644231	0.482759	833.384	1.14528	0.610687	0.534591	833.384	1.18449	0.614865	0.56962	833.384	1.26667	0.706667	0.56
833.426	1.76782	0.893805	0.874016	833.426	1.39629	0.523365	0.872928	833.426	1.76263	0.882353	0.880282	833.426	1.75871	0.718447	1.04027	833.426	1.74386	0.75	0.993865	833.426	1.74624	0.769231	0.977012	833.426	1.84325	0.931298	0.91195	833.426	1.82603	0.851351	0.974684	833.426	1.82381	0.846667	0.977143
833.468	1.1588	0.654867	0.503937	833.468	1.1532	0.523365	0.629834	833.468	1.17854	0.558824	0.619718	833.468	1.2708	0.572816	0.697987	833.468	1.39117	0.697917	0.693252	833.468	1.2416	0.557692	0.683908	833.468	1.30832	0.679389	0.628931	833.468	1.45245	0.648649	0.803798	833.468	1.42095	0.666667	0.754286
833.511	0.847049	0.39823	0.448819	833.511	0.970878	0.523365	0.447514	833.511	0.942695	0.421569	0.521127	833.511	1.02391	0.533981	0.489933	833.511	1.10353	0.625	0.478528	833.511	0.942529	0.5	0.442529	833.511	1.10845	0.580153	0.528302	833.511	1.10007	0.581081	0.518987	833.511	1.04952	0.506667	0.542857
833.553	1.15992	0.522124	0.637795	833.553	1.15867	0.64486	0.513812	833.553	1.17095	0.656863	0.514085	833.553	1.41956	0.815534	0.604027	833.553	1.4591	0.833333	0.625767	833.553	1.46673	0.817308	0.649425	833.553	1.50324	0.78626	0.716981	833.553	1.56269	0.79054	0.772152	833.553	1.55524	0.806667	0.748571
833.595	1.56024	0.79646	0.763779	833.595	1.25523	0.448598	0.80663	833.595	1.5127	0.745098	0.767606	833.595	1.46856	0.669903	0.798658	833.595	1.48933	0.697917	0.791411	833.595	1.49691	0.692308	0.804598	833.595	1.62139	0.778626	0.842767	833.595	1.6336	0.810811	0.822785	833.595	1.6	0.76	0.84
833.637	0.924605	0.60177	0.322835	833.637	0.963236	0.504673	0.458564	833.637	1.04419	0.656863	0.387324	833.637	1.12471	0.621359	0.503356	833.637	1.19242	0.677083	0.515337	833.637	1.07317	0.596154	0.477011	833.637	1.18297	0.717557	0.465409	833.637	1.14788	0.736487	0.411392	833.637	1.21714	0.72	0.497143
833.679	1.18549	0.539823	0.645669	833.679	1.14344	0.485981	0.657458	833.679	1.26333	0.509804	0.753521	833.679	1.17899	0.514563	0.66443	833.679	1.26374	0.552083	0.711657	833.679	1.36826	0.615385	0.752873	833.679	1.36632	0.580153	0.786164	833.679	1.49213	0.675676	0.816456	833.679	1.37905	0.573333	0.805714
833.722	1.50819	0.681416	0.826772	833.722	1.4043	0.691589	0.712707	833.722	1.50138	0.754902	0.746479	833.722	1.48883	0.757282	0.731544	833.722	1.50888	0.760417	0.748466	833.722	1.6355	0.865385	0.770115	833.722	1.71165	0.862595	0.849057	833.722	1.69988	0.858108	0.841772	833.722	1.69429	0.82	0.874286
833.764	1.63111	0.79646	0.834646	833.764	1.61631	0.831776	0.78453	833.764	1.64927	0.754902	0.894366	833.764	1.69173	0.805825	0.885906	833.764	1.72719	0.84375	0.883436	833.764	1.75818	0.884615	0.873563	833.764	1.71079	0.78626	0.924528	833.764	1.98854	0.918919	1.06962	833.764	1.84286	0.86	0.982857
833.806	1.02801	0.539823	0.488189	833.806	1.07033	0.523365	0.546961	833.806	1.21872	0.676471	0.542254	833.806	1.27022	0.679612	0.590604	833.806	1.30771	0.71875	0.588957	833.806	1.24569	0.625	0.62069	833.806	1.32988	0.694657	0.63522	833.806	1.38035	0.70946	0.670886	833.806	1.43905	0.753333	0.685714
833.848	0.645321	0.353982	0.291339	833.848	0.644137	0.345794	0.298343	833.848	0.641397	0.401961	0.239437	833.848	0.744054	0.38835	0.355705	833.848	0.939161	0.583333	0.355828	833.848	0.768126	0.480769	0.287356	833.848	0.879399	0.458015	0.421384	833.848	0.958262	0.54054	0.417722	833.848	0.90381	0.486667	0.417143
833.89	1.50331	0.637168	0.866142	833.89	1.27222	0.476635	0.79558	833.89	1.50069	0.627451	0.873239	833.89	1.44002	0.533981	0.90604	833.89	1.41155	0.583333	0.828221	833.89	1.45601	0.519231	0.936782	833.89	1.51323	0.557252	0.955975	833.89	1.64737	0.628378	1.01899	833.89	1.64	0.64	1
833.933	0.984809	0.433628	0.551181	833.933	0.888883	0.457944	0.430939	833.933	0.911765	0.411765	0.5	833.933	0.972503	0.563107	0.409396	833.933	1.13235	0.635417	0.496932	833.933	1.10555	0.548077	0.557471	833.933	1.10668	0.534351	0.572327	833.933	1.20219	0.594595	0.607595	833.933	1.23524	0.606667	0.628571
833.975	1.11846	0.646018	0.472441	833.975	1.12341	0.626168	0.497238	833.975	1.17095	0.656863	0.514085	833.975	1.27764	0.660194	0.61745	833.975	1.30956	0.708333	0.601227	833.975	1.32482	0.778846	0.545977	833.975	1.38374	0.78626	0.597484	833.975	1.45766	0.831081	0.626582	833.975	1.41143	0.84	0.571429
834.017	0.889415	0.353982	0.535433	834.017	0.943254	0.523365	0.41989	834.017	0.948495	0.392157	0.556338	834.017	1.02535	0.495146	0.530201	834.017	1.12321	0.583333	0.539877	834.017	1.13826	0.586538	0.551724	834.017	1.17812	0.51145	0.666667	834.017	1.22408	0.54054	0.683544	834.017	1.24	0.56	0.68
834.059	1.0724	0.442478	0.629921	834.059	1.01637	0.485981	0.530387	834.059	1.11848	0.470588	0.647887	834.059	1.04763	0.436893	0.610738	834.059	1.0657	0.458333	0.607362	834.059	1.10312	0.413461	0.689655	834.059	1.175	0.458015	0.716981	834.059	1.357	0.54054	0.816456	834.059	1.29429	0.58	0.714286
834.101	1.44812	0.707965	0.740158	834.101	1.38736	0.542056	0.845304	834.101	1.51698	0.735294	0.78169	834.101	1.56252	0.669903	0.892617	834.101	1.58691	0.666667	0.920245	834.101	1.63495	0.721154	0.913793	834.101	1.81948	0.832061	0.987421	834.101	1.78507	0.804054	0.981013	834.101	1.69143	0.72	0.971429
834.144	1.39405	0.646018	0.748031	834.144	1.2764	0.635514	0.640884	834.144	1.43303	0.637255	0.795775	834.144	1.36261	0.631068	0.731544	834.144	1.44581	0.666667	0.779141	834.144	1.51238	0.730769	0.781609	834.144	1.69912	0.755725	0.943396	834.144	1.685	0.722973	0.962025	834.144	1.53238	0.686667	0.845714
834.186	0.830395	0.318584	0.511811	834.186	0.719368	0.327103	0.392265	834.186	0.833333	0.333333	0.5	834.186	0.794748	0.378641	0.416107	834.186	0.770194	0.291667	0.478528	834.186	0.79244	0.326923	0.465517	834.186	0.989054	0.366412	0.622641	834.186	1.05183	0.418919	0.632911	834.186	1.0819	0.373333	0.708571
834.228	1.16682	0.513274	0.653543	834.228	1.10048	0.570094	0.530387	834.228	1.23336	0.578431	0.65493	834.228	1.34404	0.679612	0.66443	834.228	1.36848	0.6875	0.680982	834.228	1.17639	0.538462	0.637931	834.228	1.39191	0.618321	0.773585	834.228	1.44364	0.70946	0.734177	834.228	1.52667	0.686667	0.84
834.27	1.04975	0.451327	0.598425	834.27	0.955646	0.364486	0.59116	834.27	1.24869	0.607843	0.640845	834.27	1.04678	0.368932	0.677852	834.27	1.16328	0.427083	0.736196	834.27	1.24149	0.528846	0.712644	834.27	1.30208	0.572519	0.72956	834.27	1.39292	0.608108	0.78481	834.27	1.27143	0.5	0.771429
834.312	1.10201	0.353982	0.748031	834.312	0.764496	0.140187	0.624309	834.312	1.09114	0.323529	0.767606	834.312	0.876458	0.165048	0.711409	834.312	0.892319	0.260417	0.631902	834.312	0.956786	0.221154	0.735632	834.312	1.09828	0.236641	0.861635	834.312	1.2429	0.337838	0.905063	834.312	1.18381	0.246667	0.937143
834.354	0.889415	0.353982	0.535433	834.354	0.814117	0.383178	0.430939	834.354	0.941729	0.343137	0.598592	834.354	0.823027	0.339806	0.483222	834.354	1.04544	0.46875	0.576687	834.354	0.95546	0.375	0.58046	834.354	1.14312	0.419847	0.72327	834.354	1.19783	0.425676	0.772152	834.354	1.17238	0.486667	0.685714
834.397	0.976935	0.433628	0.543307	834.397	0.98704	0.495327	0.491713	834.397	1.00028	0.45098	0.549296	834.397	1.04763	0.436893	0.610738	834.397	1.10551	0.510417	0.595092	834.397	1.02476	0.461539	0.563218	834.397	1.27063	0.572519	0.698113	834.397	1.2642	0.574324	0.689873	834.397	1.25143	0.6	0.651429
834.439	0.627761	0.19469	0.433071	834.439	0.547271	0.271028	0.276243	834.439	0.595968	0.215686	0.380282	834.439	0.676093	0.320388	0.355705	834.439	0.722265	0.354167	0.368098	834.439	0.677387	0.298077	0.37931	834.439	0.880791	0.358779	0.522013	834.439	0.8091	0.283784	0.525316	834.439	0.902857	0.32	0.582857
834.481	1.44311	0.80531	0.637795	834.481	1.34141	0.672897	0.668508	834.481	1.55717	0.852941	0.704225	834.481	1.55151	0.786408	0.765101	834.481	1.60634	0.833333	0.773006	834.481	1.54907	0.807692	0.741379	834.481	1.6766	0.877863	0.798742	834.481	1.64087	0.925676	0.71519	834.481	1.57238	0.886667	0.685714
834.523	1.23859	0.59292	0.645669	834.523	1.10136	0.504673	0.596685	834.523	1.26429	0.588235	0.676056	834.523	1.32378	0.592233	0.731544	834.523	1.35078	0.614583	0.736196	834.523	1.27608	0.557692	0.718391	834.523	1.45657	0.664122	0.792453	834.523	1.49889	0.682432	0.816456	834.523	1.45524	0.666667	0.788571
834.565	1.05951	0.539823	0.519685	834.565	0.789074	0.308411	0.480663	834.565	1.1026	0.539216	0.56338	834.565	1.04092	0.436893	0.604027	834.565	0.981084	0.416667	0.564417	834.565	1.09372	0.461539	0.632184	834.565	1.17634	0.465649	0.710692	834.565	1.26882	0.547297	0.721519	834.565	1.09619	0.473333	0.622857
834.608	1.19734	0.504425	0.692913	834.608	0.98198	0.401869	0.58011	834.608	1.31911	0.607843	0.711268	834.608	1.25295	0.601942	0.651007	834.608	1.18156	0.53125	0.650307	834.608	1.23011	0.557692	0.672414	834.608	1.45705	0.59542	0.861635	834.608	1.48366	0.641892	0.841772	834.608	1.48	0.64	0.84
834.65	1.16382	0.557522	0.606299	834.65	1.04781	0.495327	0.552486	834.65	1.30627	0.637255	0.669014	834.65	1.24767	0.563107	0.684564	834.65	1.22322	0.572917	0.650307	834.65	1.22834	0.596154	0.632184	834.65	1.40088	0.633588	0.767296	834.65	1.43175	0.621622	0.810127	834.65	1.40381	0.666667	0.737143
834.692	1.30555	0.557522	0.748031	834.692	1.2811	0.579439	0.701658	834.692	1.3372	0.647059	0.690141	834.692	1.27751	0.572816	0.704698	834.692	1.34893	0.625	0.723926	834.692	1.41446	0.673077	0.741379	834.692	1.53699	0.656489	0.880503	834.692	1.58792	0.689189	0.898734	834.692	1.41524	0.626667	0.788571
834.734	0.928716	0.424779	0.503937	834.734	0.885527	0.35514	0.530387	834.734	0.941453	0.392157	0.549296	834.734	0.958103	0.407767	0.550336	834.734	0.832119	0.322917	0.509203	834.734	0.982538	0.442308	0.54023	834.734	1.15747	0.465649	0.691824	834.734	1.26796	0.533784	0.734177	834.734	1.14857	0.52	0.628571
834.776	1.34576	0.707965	0.637795	834.776	1.47865	0.738318	0.740332	834.776	1.54709	0.892157	0.65493	834.776	1.70972	0.864078	0.845638	834.776	1.7075	0.885417	0.822086	834.776	1.64699	0.865385	0.781609	834.776	1.6272	0.847328	0.779874	834.776	1.76788	0.932432	0.835443	834.776	1.64286	0.86	0.782857
834.819	1.35168	0.690265	0.661417	834.819	1.26494	0.607477	0.657458	834.819	1.40279	0.754902	0.647887	834.819	1.38216	0.737864	0.644295	834.819	1.32554	0.6875	0.638037	834.819	1.38959	0.682692	0.706897	834.819	1.56119	0.793893	0.767296	834.819	1.58587	0.756757	0.829114	834.819	1.48952	0.746667	0.742857
834.861	1.32311	0.716814	0.606299	834.861	1.15067	0.476635	0.674033	834.861	1.33389	0.735294	0.598592	834.861	1.41044	0.699029	0.711409	834.861	1.37347	0.625	0.748466	834.861	1.30128	0.634615	0.666667	834.861	1.48303	0.778626	0.704403	834.861	1.45629	0.70946	0.746835	834.861	1.4819	0.733333	0.748571
834.903	1.30757	0.504425	0.80315	834.903	1.31166	0.654206	0.657458	834.903	1.33775	0.54902	0.788732	834.903	1.34319	0.61165	0.731544	834.903	1.41143	0.6875	0.723926	834.903	1.41821	0.653846	0.764368	834.903	1.5729	0.717557	0.855346	834.903	1.61914	0.682432	0.936709	834.903	1.55238	0.666667	0.885714
834.945	0.881332	0.566372	0.314961	834.945	0.871431	0.523365	0.348066	834.945	0.851837	0.54902	0.302817	834.945	1.08516	0.601942	0.483222	834.945	1.18443	0.6875	0.496932	834.945	0.998453	0.596154	0.402299	834.945	1.06664	0.664122	0.402516	834.945	1.11281	0.682432	0.43038	834.945	1.15905	0.713333	0.445714
834.987	1.34179	0.743363	0.598425	834.987	1.43058	0.850467	0.58011	834.987	1.40983	0.754902	0.65493	834.987	1.42855	0.84466	0.583893	834.987	1.56697	0.916667	0.650307	834.987	1.55139	0.913462	0.637931	834.987	1.48884	0.847328	0.641509	834.987	1.70835	0.891892	0.816456	834.987	1.55143	0.9	0.651429
835.029	0.982858	0.415929	0.566929	835.029	0.746166	0.271028	0.475138	835.029	1.05109	0.431373	0.619718	835.029	0.831889	0.281553	0.550336	835.029	0.877492	0.34375	0.533742	835.029	0.963196	0.394231	0.568966	835.029	1.22531	0.458015	0.767296	835.029	1.28353	0.47973	0.803798	835.029	1.1419	0.433333	0.708571
835.072	1.31921	0.681416	0.637795	835.072	1.32225	0.747664	0.574586	835.072	1.3412	0.686275	0.65493	835.072	1.47996	0.815534	0.66443	835.072	1.40401	0.729167	0.674847	835.072	1.45325	0.798077	0.655172	835.072	1.42508	0.770992	0.654088	835.072	1.56611	0.844595	0.721519	835.072	1.48762	0.773333	0.714286
835.114	1.42945	0.681416	0.748031	835.114	1.19275	0.457944	0.734807	835.114	1.56352	0.72549	0.838028	835.114	1.42516	0.572816	0.852349	835.114	1.48888	0.5625	0.92638	835.114	1.40827	0.557692	0.850575	835.114	1.65644	0.763359	0.893082	835.114	1.67747	0.804054	0.873418	835.114	1.58476	0.693333	0.891429
835.156	1.01624	0.504425	0.511811	835.156	1.04311	0.551402	0.491713	835.156	1.08423	0.54902	0.535211	835.156	1.18583	0.601942	0.583893	835.156	1.22623	0.625	0.601227	835.156	1.2342	0.625	0.609195	835.156	1.13227	0.572519	0.559748	835.156	1.27942	0.614865	0.664557	835.156	1.30952	0.646667	0.662857
835.198	1.14626	0.39823	0.748031	835.198	1.10477	0.485981	0.618784	835.198	1.22135	0.460784	0.760563	835.198	1.1857	0.514563	0.671141	835.198	1.28087	0.59375	0.687117	835.198	1.27597	0.528846	0.747127	835.198	1.36142	0.480916	0.880503	835.198	1.48529	0.567568	0.917721	835.198	1.45333	0.533333	0.92
835.24	0.988711	0.469027	0.519685	835.24	0.849796	0.429907	0.41989	835.24	1.00055	0.401961	0.598592	835.24	0.951391	0.407767	0.543624	835.24	1.0092	0.5	0.509203	835.24	0.915451	0.432692	0.482759	835.24	1.13678	0.526717	0.610063	835.24	1.29798	0.608108	0.689873	835.24	1.19714	0.54	0.657143
835.283	1.13344	0.424779	0.708661	835.283	1.10389	0.551402	0.552486	835.283	1.28873	0.5	0.788732	835.283	1.22239	0.61165	0.610738	835.283	1.29058	0.677083	0.613497	835.283	1.26116	0.663462	0.597701	835.283	1.34702	0.541985	0.805031	835.283	1.52668	0.621622	0.905063	835.283	1.51714	0.66	0.857143
835.325	1.24932	0.690265	0.559055	835.325	1.28786	0.663551	0.624309	835.325	1.37462	0.754902	0.619718	835.325	1.40757	0.776699	0.630872	835.325	1.47821	0.760417	0.717791	835.325	1.47624	0.798077	0.678161	835.325	1.52657	0.847328	0.679245	835.325	1.59733	0.837838	0.759494	835.325	1.44952	0.826667	0.622857
835.367	1.08202	0.672566	0.409449	835.367	1.17695	0.635514	0.541436	835.367	1.17923	0.686275	0.492958	835.367	1.30749	0.669903	0.637584	835.367	1.42114	0.770833	0.650307	835.367	1.20756	0.673077	0.534483	835.367	1.36713	0.763359	0.603774	835.367	1.36102	0.804054	0.556962	835.367	1.35333	0.793333	0.56
835.409	1.22096	0.504425	0.716535	835.409	1.10518	0.514019	0.59116	835.409	1.2799	0.568627	0.711268	835.409	1.16257	0.504854	0.657718	835.409	1.21779	0.5	0.717791	835.409	1.19927	0.509615	0.689655	835.409	1.42335	0.618321	0.805031	835.409	1.3304	0.52027	0.810127	835.409	1.40381	0.546667	0.857143
835.452	0.964044	0.530973	0.433071	835.452	0.957712	0.504673	0.453039	835.452	1.1541	0.647059	0.507042	835.452	1.14485	0.621359	0.52349	835.452	1.21952	0.59375	0.625767	835.452	1.19419	0.682692	0.511494	835.452	1.11114	0.59542	0.515723	835.452	1.23392	0.695946	0.537975	835.452	1.22762	0.633333	0.594286
835.494	1.04787	0.362832	0.685039	835.494	0.953942	0.373832	0.58011	835.494	1.18337	0.45098	0.732394	835.494	0.958689	0.300971	0.657718	835.494	1.07739	0.427083	0.650307	835.494	1.01459	0.307692	0.706897	835.494	1.31965	0.458015	0.861635	835.494	1.38608	0.5	0.886076	835.494	1.30762	0.473333	0.834286
835.536	1.07916	0.575221	0.503937	835.536	1.12681	0.607477	0.519337	835.536	1.1976	0.676471	0.521127	835.536	1.25751	0.660194	0.597315	835.536	1.24035	0.614583	0.625767	835.536	1.34781	0.778846	0.568966	835.536	1.33885	0.709924	0.628931	835.536	1.45381	0.77027	0.683544	835.536	1.36667	0.726667	0.64
835.578	1.10459	0.734513	0.370079	835.578	1.2449	0.747664	0.497238	835.578	1.09901	0.676471	0.422535	835.578	1.31961	0.796117	0.52349	835.578	1.40389	0.833333	0.570552	835.578	1.28084	0.798077	0.482759	835.578	1.23549	0.801527	0.433962	835.578	1.44424	0.918919	0.525316	835.578	1.42857	0.88	0.548571
835.62	0.825378	0.415929	0.409449	835.62	1.00232	0.53271	0.469613	835.62	0.925297	0.509804	0.415493	835.62	0.914967	0.485437	0.42953	835.62	1.06371	0.572917	0.490797	835.62	0.979111	0.548077	0.431034	835.62	1.14485	0.572519	0.572327	835.62	1.15746	0.587838	0.56962	835.62	1.07905	0.553333	0.525714
835.663	1.13929	0.477876	0.661417	835.663	0.904632	0.401869	0.502762	835.663	1.14085	0.5	0.640845	835.663	1.08191	0.417476	0.66443	835.663	1.15702	0.53125	0.625767	835.663	1.08201	0.403846	0.678161	835.663	1.27875	0.51145	0.767296	835.663	1.35913	0.574324	0.78481	835.663	1.24286	0.54	0.702857
835.705	1.22291	0.522124	0.700787	835.705	0.854133	0.224299	0.629834	835.705	1.24648	0.5	0.746479	835.705	1.18414	0.466019	0.718121	835.705	1.23562	0.46875	0.766871	835.705	1.2395	0.509615	0.729885	835.705	1.40223	0.641221	0.761006	835.705	1.38488	0.581081	0.803798	835.705	1.44857	0.62	0.828571
835.747	1.45	0.79646	0.653543	835.747	1.41782	0.859813	0.558011	835.747	1.4757	0.813725	0.661972	835.747	1.62559	0.961165	0.66443	835.747	1.64788	0.979167	0.668712	835.747	1.57272	0.980769	0.591954	835.747	1.62269	0.89313	0.72956	835.747	1.7181	0.945946	0.772152	835.747	1.83714	1.06	0.777143
835.789	1.26312	0.672566	0.590551	835.789	1.07761	0.392523	0.685083	835.789	1.51395	0.77451	0.739437	835.789	1.2938	0.495146	0.798658	835.789	1.34164	0.5625	0.779141	835.789	1.28946	0.548077	0.741379	835.789	1.52662	0.740458	0.786164	835.789	1.58125	0.783784	0.797468	835.789	1.42095	0.626667	0.794286
835.831	1.01331	0.477876	0.535433	835.831	1.15227	0.71028	0.441989	835.831	1.13477	0.578431	0.556338	835.831	1.16427	0.640777	0.52349	835.831	1.22067	0.65625	0.564417	835.831	1.20579	0.711538	0.494253	835.831	1.26026	0.656489	0.603774	835.831	1.44158	0.777027	0.664557	835.831	1.4	0.76	0.64
835.873	1.53174	0.752212	0.779528	835.873	1.3665	0.626168	0.740332	835.873	1.63215	0.794118	0.838028	835.873	1.66261	0.776699	0.885906	835.873	1.62059	0.71875	0.901841	835.873	1.6985	0.807692	0.890805	835.873	1.67977	0.824427	0.855346	835.873	1.77583	0.858108	0.917721	835.873	1.76952	0.826667	0.942857
835.916	1.0517	0.469027	0.582677	835.916	0.953477	0.46729	0.486188	835.916	1.01284	0.470588	0.542254	835.916	0.991073	0.514563	0.47651	835.916	1.10909	0.59375	0.515337	835.916	1.20546	0.625	0.58046	835.916	1.22752	0.541985	0.685535	835.916	1.39506	0.641892	0.753165	835.916	1.28667	0.646667	0.64
835.958	1.36945	0.637168	0.732283	835.958	1.40899	0.635514	0.773481	835.958	1.54943	0.72549	0.823944	835.958	1.51039	0.718447	0.791946	835.958	1.5163	0.71875	0.797546	835.958	1.47756	0.644231	0.833333	835.958	1.62499	0.763359	0.861635	835.958	1.6838	0.804054	0.879747	835.958	1.60667	0.766667	0.84
836	0.777158	0.40708	0.370079	836	0.782672	0.373832	0.40884	836	0.698012	0.352941	0.34507	836	0.877696	0.495146	0.38255	836	0.874233	0.5	0.374233	836	0.902188	0.471154	0.431034	836	1.04244	0.526717	0.515723	836	1.07176	0.533784	0.537975	836	0.992381	0.546667	0.445714
836.042	0.68274	0.336283	0.346457	836.042	0.84675	0.598131	0.248619	836.042	0.759597	0.421569	0.338028	836.042	0.920375	0.61165	0.308725	836.042	1.09356	0.75	0.343558	836.042	1.01989	0.692308	0.327586	836.042	1.03927	0.580153	0.45912	836.042	1.05919	0.635135	0.424051	836.042	1.10095	0.706667	0.394286
836.084	1.42945	0.681416	0.748031	836.084	1.20633	0.504673	0.701658	836.084	1.47625	0.715686	0.760563	836.084	1.53124	0.699029	0.832215	836.084	1.47463	0.677083	0.797546	836.084	1.51636	0.769231	0.747127	836.084	1.58726	0.763359	0.823899	836.084	1.70493	0.837838	0.867089	836.084	1.4781	0.746667	0.731429
836.127	1.13233	0.557522	0.574803	836.127	0.922497	0.364486	0.558011	836.127	1.22452	0.647059	0.577465	836.127	1.07891	0.407767	0.671141	836.127	1.23805	0.489583	0.748466	836.127	1.15318	0.480769	0.672414	836.127	1.27735	0.610687	0.666667	836.127	1.35708	0.641892	0.71519	836.127	1.26286	0.52	0.742857
836.169	1.53265	0.831858	0.700787	836.169	1.35333	0.607477	0.745856	836.169	1.64747	0.823529	0.823944	836.169	1.65374	0.834951	0.818792	836.169	1.64928	0.833333	0.815951	836.169	1.62953	0.807692	0.821839	836.169	1.72197	0.885496	0.836478	836.169	1.77506	0.945946	0.829114	836.169	1.81905	0.893333	0.925714
836.211	0.924814	0.389381	0.535433	836.211	0.89699	0.383178	0.513812	836.211	0.999033	0.421569	0.577465	836.211	1.0088	0.398058	0.610738	836.211	1.00435	0.458333	0.546012	836.211	0.938218	0.375	0.563218	836.211	1.16376	0.465649	0.698113	836.211	1.28567	0.513513	0.772152	836.211	1.16762	0.453333	0.714286
836.253	1.2503	0.699115	0.551181	836.253	1.12857	0.476635	0.651934	836.253	1.38719	0.77451	0.612676	836.253	1.35818	0.660194	0.697987	836.253	1.46964	0.739583	0.730061	836.253	1.44529	0.721154	0.724138	836.253	1.47717	0.816794	0.660377	836.253	1.47451	0.797297	0.677215	836.253	1.46667	0.786667	0.68
836.295	0.77904	0.495575	0.283465	836.295	0.79496	0.457944	0.337017	836.295	0.892571	0.568627	0.323944	836.295	0.963511	0.533981	0.42953	836.295	1.02077	0.572917	0.447853	836.295	1.03526	0.701923	0.333333	836.295	1.08776	0.641221	0.446541	836.295	1.13351	0.70946	0.424051	836.295	1.14952	0.686667	0.462857
836.338	0.938401	0.584071	0.354331	836.338	1.1136	0.71028	0.403315	836.338	0.96976	0.617647	0.352113	836.338	1.23751	0.747573	0.489933	836.338	1.2769	0.822917	0.453988	836.338	1.23486	0.798077	0.436782	836.338	1.17711	0.755725	0.421384	836.338	1.29773	0.804054	0.493671	836.338	1.33429	0.78	0.554286
836.38	0.856038	0.265487	0.590551	836.38	0.723654	0.242991	0.480663	836.38	0.998067	0.343137	0.65493	836.38	0.857301	0.320388	0.536913	836.38	0.842536	0.333333	0.509203	836.38	0.85168	0.288461	0.563218	836.38	1.01829	0.282443	0.735849	836.38	1.14001	0.412162	0.727848	836.38	1.07429	0.36	0.714286
836.422	1.31245	0.548673	0.763779	836.422	1.08953	0.327103	0.762431	836.422	1.43303	0.637255	0.795775	836.422	1.34834	0.563107	0.785235	836.422	1.28898	0.479167	0.809816	836.422	1.31609	0.5	0.816092	836.422	1.52081	0.671756	0.849057	836.422	1.58579	0.655405	0.93038	836.422	1.5581	0.626667	0.931429
836.464	0.949411	0.39823	0.551181	836.464	0.828987	0.392523	0.436464	836.464	1.04253	0.45098	0.591549	836.464	1.12159	0.524272	0.597315	836.464	1.07426	0.479167	0.595092	836.464	1.14169	0.480769	0.660919	836.464	1.3003	0.526717	0.773585	836.464	1.36084	0.601351	0.759494	836.464	1.31048	0.573333	0.737143
836.506	1.31238	0.619469	0.692913	836.506	1.30402	0.635514	0.668508	836.506	1.41287	0.715686	0.697183	836.506	1.3342	0.582524	0.751678	836.506	1.58621	0.739583	0.846626	836.506	1.41247	0.653846	0.758621	836.506	1.42916	0.687023	0.742138	836.506	1.55884	0.72973	0.829114	836.506	1.57619	0.753333	0.822857
836.548	0.891366	0.371681	0.519685	836.548	0.988744	0.485981	0.502762	836.548	0.988953	0.460784	0.528169	836.548	1.16511	0.708738	0.456376	836.548	1.18571	0.645833	0.539877	836.548	1.21905	0.673077	0.545977	836.548	1.2823	0.603054	0.679245	836.548	1.3765	0.648649	0.727848	836.548	1.2781	0.626667	0.651429
836.591	1.12738	0.584071	0.543307	836.591	0.91439	0.439252	0.475138	836.591	1.12096	0.529412	0.591549	836.591	1.141	0.543689	0.597315	836.591	1.13746	0.46875	0.668712	836.591	1.11527	0.586538	0.528736	836.591	1.38202	0.633588	0.748428	836.591	1.39129	0.682432	0.708861	836.591	1.27333	0.633333	0.64
836.633	1.28486	0.584071	0.700787	836.633	1.22843	0.504673	0.723757	836.633	1.39754	0.686275	0.711268	836.633	1.22526	0.533981	0.691275	836.633	1.38145	0.614583	0.766871	836.633	1.36638	0.625	0.741379	836.633	1.44894	0.656489	0.792453	836.633	1.58921	0.70946	0.879747	836.633	1.45429	0.62	0.834286
836.675	1.36938	0.707965	0.661417	836.675	1.26494	0.607477	0.657458	836.675	1.50055	0.901961	0.598592	836.675	1.60605	0.854369	0.751678	836.675	1.51745	0.78125	0.736196	836.675	1.45701	0.778846	0.678161	836.675	1.59307	0.832061	0.761006	836.675	1.67123	0.905405	0.765823	836.675	1.60857	0.9	0.708571
836.717	0.958261	0.40708	0.551181	836.717	0.595343	0.158879	0.436464	836.717	1.14637	0.519608	0.626761	836.717	0.972959	0.368932	0.604027	836.717	0.988497	0.375	0.613497	836.717	0.97447	0.336539	0.637931	836.717	1.08066	0.458015	0.622641	836.717	1.28233	0.560811	0.721519	836.717	1.05524	0.386667	0.668571
836.76	1.09498	0.504425	0.590551	836.76	0.976868	0.429907	0.546961	836.76	1.11544	0.509804	0.605634	836.76	1.25881	0.533981	0.724832	836.76	1.15331	0.552083	0.601227	836.76	1.07648	0.461539	0.614943	836.76	1.29397	0.633588	0.660377	836.76	1.39848	0.695946	0.702532	836.76	1.32667	0.646667	0.68
836.802	1.05561	0.504425	0.551181	836.802	1.00914	0.495327	0.513812	836.802	1.06462	0.529412	0.535211	836.802	1.02763	0.524272	0.503356	836.802	1.18213	0.5625	0.619632	836.802	1.13638	0.596154	0.54023	836.802	1.25445	0.587786	0.666667	836.802	1.34827	0.702703	0.64557	836.802	1.26286	0.64	0.622857
836.844	0.882517	0.362832	0.519685	836.844	0.778851	0.364486	0.414365	836.844	0.93013	0.401961	0.528169	836.844	1.03291	0.563107	0.469799	836.844	1.04844	0.520833	0.527607	836.844	0.94065	0.509615	0.431034	836.844	1.0676	0.526717	0.54088	836.844	1.16841	0.560811	0.607595	836.844	1.16095	0.566667	0.594286
836.886	1.0901	0.460177	0.629921	836.886	1.12387	0.53271	0.59116	836.886	1.14388	0.460784	0.683099	836.886	1.16857	0.524272	0.644295	836.886	1.2723	0.572917	0.699387	836.886	1.1838	0.471154	0.712644	836.886	1.26482	0.503817	0.761006	836.886	1.42285	0.581081	0.841772	836.886	1.29429	0.54	0.754286
836.928	1.27887	0.672566	0.606299	836.928	1.33459	0.71028	0.624309	836.928	1.41839	0.735294	0.683099	836.928	1.48211	0.757282	0.724832	836.928	1.52358	0.78125	0.742331	836.928	1.42617	0.730769	0.695402	836.928	1.57511	0.801527	0.773585	836.928	1.57492	0.783784	0.791139	836.928	1.59905	0.833333	0.765714
836.971	1.38011	0.80531	0.574803	836.971	1.13833	0.514019	0.624309	836.971	1.36026	0.803922	0.556338	836.971	1.47755	0.699029	0.778524	836.971	1.49974	0.708333	0.791411	836.971	1.3876	0.663462	0.724138	836.971	1.47223	0.824427	0.647799	836.971	1.51129	0.878378	0.632911	836.971	1.44952	0.746667	0.702857
837.013	0.843983	0.513274	0.330709	837.013	1.01549	0.551402	0.464088	837.013	1.04999	0.627451	0.422535	837.013	1.20454	0.640777	0.563758	837.013	1.29787	0.739583	0.558282	837.013	1.0809	0.615385	0.465517	837.013	1.22699	0.717557	0.509434	837.013	1.3032	0.79054	0.512658	837.013	1.2	0.72	0.48
837.055	1.46185	0.761062	0.700787	837.055	1.3665	0.626168	0.740332	837.055	1.4594	0.705882	0.753521	837.055	1.54923	0.757282	0.791946	837.055	1.61746	0.770833	0.846626	837.055	1.45645	0.634615	0.821839	837.055	1.61554	0.816794	0.798742	837.055	1.60238	0.817568	0.78481	837.055	1.63429	0.8	0.834286
837.097	1.14027	0.486726	0.653543	837.097	0.913564	0.383178	0.530387	837.097	1.14913	0.529412	0.619718	837.097	1.2134	0.582524	0.630872	837.097	1.09011	0.5625	0.527607	837.097	1.22259	0.596154	0.626437	837.097	1.12694	0.435115	0.691824	837.097	1.29875	0.52027	0.778481	837.097	1.3819	0.673333	0.708571
837.139	1.27294	0.690265	0.582677	837.139	1.33841	0.719626	0.618784	837.139	1.39147	0.764706	0.626761	837.139	1.54636	0.834951	0.711409	837.139	1.53828	0.802083	0.736196	837.139	1.52034	0.807692	0.712644	837.139	1.62451	0.832061	0.792453	837.139	1.60323	0.831081	0.772152	837.139	1.65905	0.853333	0.805714
837.182	1.12334	0.690265	0.433071	837.182	1.20964	0.728972	0.480663	837.182	1.30544	0.784314	0.521127	837.182	1.4741	0.883495	0.590604	837.182	1.49406	0.84375	0.650307	837.182	1.43236	0.846154	0.586207	837.182	1.37025	0.816794	0.553459	837.182	1.37496	0.824324	0.550633	837.182	1.50762	0.873333	0.634286
837.224	1.40178	0.787611	0.614173	837.224	1.41999	0.757009	0.662983	837.224	1.5544	0.843137	0.711268	837.224	1.66945	0.864078	0.805369	837.224	1.73875	0.916667	0.822086	837.224	1.60279	0.826923	0.775862	837.224	1.76283	0.938931	0.823899	837.224	1.82065	0.966216	0.85443	837.224	1.82571	0.94	0.885714
837.266	1.13525	0.584071	0.551181	837.266	1.01508	0.523365	0.491713	837.266	1.2404	0.578431	0.661972	837.266	1.0993	0.582524	0.516779	837.266	1.31512	0.677083	0.638037	837.266	1.18446	0.644231	0.54023	837.266	1.3546	0.656489	0.698113	837.266	1.53738	0.79054	0.746835	837.266	1.44571	0.72	0.725714
837.308	1.29364	0.663717	0.629921	837.308	1.19229	0.551402	0.640884	837.308	1.3158	0.696078	0.619718	837.308	1.31348	0.68932	0.624161	837.308	1.48262	0.666667	0.815951	837.308	1.33974	0.673077	0.666667	837.308	1.52749	0.816794	0.710692	837.308	1.50787	0.824324	0.683544	837.308	1.48095	0.726667	0.754286
837.35	1.28493	0.513274	0.771653	837.35	1.12304	0.476635	0.646409	837.35	1.43607	0.598039	0.838028	837.35	1.26409	0.572816	0.691275	837.35	1.32138	0.572917	0.748466	837.35	1.34704	0.576923	0.770115	837.35	1.53522	0.610687	0.924528	837.35	1.67781	0.70946	0.968354	837.35	1.60476	0.633333	0.971429
837.392	1.5748	1	0.574803	837.392	1.5925	0.841121	0.751381	837.392	1.72231	1.03922	0.683099	837.392	1.79638	0.970874	0.825503	837.392	1.86874	0.979167	0.889571	837.392	1.69308	0.894231	0.798851	837.392	1.76413	1.05343	0.710692	837.392	1.83767	1.13514	0.702532	837.392	1.78857	1.04	0.748571
837.435	1.58296	0.716814	0.866142	837.435	1.37079	0.542056	0.828729	837.435	1.68696	0.813725	0.873239	837.435	1.54167	0.68932	0.852349	837.435	1.70092	0.75	0.95092	837.435	1.65992	0.740385	0.91954	837.435	1.80647	0.793893	1.01258	837.435	1.77326	0.817568	0.955696	837.435	1.84095	0.806667	1.03429
837.477	1.54644	0.814159	0.732283	837.477	1.51515	0.841121	0.674033	837.477	1.66957	0.901961	0.767606	837.477	1.63146	0.893204	0.738255	837.477	1.82579	0.979167	0.846626	837.477	1.76415	0.942308	0.821839	837.477	1.93351	1.01527	0.918239	837.477	1.90421	0.986487	0.917721	837.477	1.92571	1.04	0.885714

## Sheet: Fig5a
Freqency[Hz]	Optical full angle [deg.]	Freqency[Hz]	Optical full angle [deg.]
2043	15.6	2043	13.8
2053	19.6	2053	17.6
2063	24.6	2063	22.4
2073	31.4	2073	28.6
2078	34	2078	31.8
2083	36.8	2083	34.4
2088	39	2088	37.2
2093	40.6	2093	38.4
2094	41	2094	38.6
2095	41.2	2095	38.8
2096	41.2	2096	38.8
2097	41	2097	38.2
2098	40.6	2098	37.6
2099	39.6	2099	34.4
2104	21.4	2104	19.2
2109	16.4	2109	15.4
2114	13.8	2114	12.4
2119	11.8	2119	11.4
2129	9.2	2129	10
2139	7.8	2139	7.6
2149	6.4	2149	6

## Sheet: Fig5b
Freqency[Hz]	Optical full angle [deg.]	Freqency[Hz]	Optical full angle [deg.]
735	8	737	8
745	10	747	9.8
755	13.6	757	12.4
765	19.6	767	18.4
770	25.4	772	23.8
775	33.8	777	32
780	47	782	44.6
785	60	787	57.6
786	62.2	788	59
787	63.8	789	60.2
788	64.2	790	60.4
[truncated: 10 more rows]

## Sheet: Fig5c
Time [s]	Amplitude (V) [a.u.]	Amplitude (H) [a.u.]
[truncated: 4,991 more rows]

[truncated: 7 more sheets: Fig5f, Fig6a, Fig6b, Fig6c, Fig6d, Fig6e, Fig6f]
